# Supplementary material
Source: PubMed Central journal article supplement (PMC3955718)
Supplement: NIHMS516852-supplement-1.pdf [file NIHMS516852-supplement-1.pdf]

# SUPPLEMENTAL MATERIAL

## Contents

### Supplemental Methods

Methods S1: Selection of soft-thresholding  $\beta$  parameter. **2**

### Supplemental Figures

Figure S1: Plots of scale-free topology  $R^2$  fit index (left) and mean connectivity (right) with different values of  $\beta$ . **4**

### Supplemental Figure Legends

Figure Legend S1: Plots of scale-free topology  $R^2$  fit index (left) and mean connectivity (right) with different values of  $\beta$ . **5**

### Supplemental Tables

Table S1: Clinical definitions of cardiovascular phenotype groups. **6**

Table S2: Network preservation analysis between the MV and CAD groups – size and  $Z_{\text{summary}}$  scores of gene modules detected. **7**

Table S3: Network preservation analysis between the MV and LAF groups – size and  $Z_{\text{summary}}$  scores of gene modules detected. **8**

Table S4: Proportion of variance explained by the principal components for each module. **9**

Table S5: Salmon module gene members and selected characteristics. **10**

Table S6: Tan module gene members and selected characteristics. **13**

Table S7: Ingenuity IPA<sup>®</sup> analysis of salmon module gene contents. **29**

Table S8: Ingenuity IPA<sup>®</sup> analysis of tan module gene contents. **88**

Table S9: Module locations of AF-associated candidate genes. **143**

Table S10: Module assignments for genes in network. **144**

**Supplemental references 282**

## Supplemental Methods

Weighted gene co-expression network analysis (WGCNA) is a technique developed by Horvath et. al. to identify sets (or modules) of genes that share similar correlation patterns <sup>1</sup>. In the first step of module identification, Pearson correlations between all gene pairs were computed. At this point, either a “hard thresholding” (correlations above a certain magnitude are kept while all others are shrunk to zero) or a “soft thresholding” approach may be used to quantify the connection between two genes. We chose the soft thresholding approach because it allows for the emphasis of stronger correlations over weaker and less meaningful ones while preserving the continuous nature of gene-gene relationships. The following weighted adjacency matrix was then constructed:

$$a_{ij} = |c_{ij}|^{\beta} \tag{1}$$

where  $c_{ij}$  = Pearson correlation between gene  $i$  and gene  $j$ ,  $a_{ij}$  = adjacency between gene  $i$  and gene  $j$ , and  $\beta$  = soft-thresholding parameter.

In addition to its role as a stringency parameter,  $\beta$  also serves as a tuning parameter for approximating scale-free topology. A scale-free network is one in which the connectivity of its nodes follow a power law distribution:

$$p(k) \sim k^{-\gamma} \tag{2}$$

where  $p(k)$  = fraction of nodes with  $k$  connections. A scale-free network is populated by a relatively small number of highly connected nodes (known as hubs) <sup>2</sup>. Many metabolic and biological networks have been reported to exhibit scale-free behavior <sup>1-3</sup>. Thus, it is appropriate to select  $\beta$  such that an approximate scale-free topology of the network is

achieved. We computed the signed scale-free topology model fit index ( $R^2$ ) for different values of  $\beta$ . There is an inverse relationship between the  $R^2$  index and the mean connectivity of the network. To fulfill the scale-free approximation criterion while maintaining a relatively high number of connections, we chose the first  $\beta$  value that gave an  $R^2$  index of 0.9 or above (as advocated by Horvath et. al.)<sup>1</sup>; this value corresponded to 3 in our data (Figure S1).

## Supplemental Figures



Figure S1: Plots of scale-free topology  $R^2$  fit index (left) and mean connectivity (right) with different values of  $\beta$ .

## Supplemental Figure Legends

Figure S1: Plots of scale-free topology  $R^2$  fit index (left) and mean connectivity (right) with different values of  $\beta$ . The value 3 is the first to reach the  $R^2$  index cutoff of 0.9; thus,  $\beta=3$  was chosen for the construction of the weighted adjacency matrix.

## Supplemental Tables

**Table S1: Clinical definitions of cardiovascular phenotype groups.**

| <b>Criterion Type</b> | <b>Mitral Valve (MV) Disease</b>                                                                                                                                                                                                                          | <b>Coronary Artery Disease (CAD)</b>                                                                                                                                                  | <b>Lone Atrial Fibrillation (LAF)</b>                                                                                                                                                                                                                                                                                                                                                                                                        |
|-----------------------|-----------------------------------------------------------------------------------------------------------------------------------------------------------------------------------------------------------------------------------------------------------|---------------------------------------------------------------------------------------------------------------------------------------------------------------------------------------|----------------------------------------------------------------------------------------------------------------------------------------------------------------------------------------------------------------------------------------------------------------------------------------------------------------------------------------------------------------------------------------------------------------------------------------------|
| Inclusion Criteria    | Surgical indication – mitral valve repair or replacement                                                                                                                                                                                                  | Surgical indication – coronary artery bypass graft                                                                                                                                    | History of atrial fibrillation<br><br>Surgical indication – MAZE procedure<br><br>Preserved ejection fraction ( $\geq 50\%$ )                                                                                                                                                                                                                                                                                                                |
| Exclusion Criteria    | Significant coronary artery disease:<br>- Significant ( $\geq 50\%$ ) stenosis in at least one coronary artery via cardiac catheterization<br>- History of revascularization (percutaneous coronary intervention or coronary artery bypass graft surgery) | Significant mitral valve disease:<br>- Documented echocardiography finding of mitral regurgitation ( $\geq 3$ ) or mitral stenosis<br>- History of mitral valve repair or replacement | Significant coronary artery disease:<br>- Significant ( $\geq 50\%$ ) stenosis in at least one coronary artery via cardiac catheterization<br>- History of revascularization (percutaneous coronary intervention or coronary artery bypass graft surgery)<br><br>Significant valvular heart disease:<br>- Documented echocardiography finding of valvular regurgitation ( $\geq 3$ ) or stenosis<br>- History of valve repair or replacement |

**Table S2: Network preservation analysis between the MV and CAD groups – size and  $Z_{\text{summary}}$  scores of gene modules detected.**

| <b>Module</b> | <b>Module Size</b> | <b><math>Z_{\text{summary}}</math></b> |
|---------------|--------------------|----------------------------------------|
| Black         | 275                | 15.52                                  |
| Blue          | 964                | 44.79                                  |
| Brown         | 817                | 12.80                                  |
| Cyan          | 119                | 13.42                                  |
| Green         | 349                | 14.27                                  |
| Green-Yellow  | 215                | 19.31                                  |
| Magenta       | 239                | 15.38                                  |
| Midnight-Blue | 83                 | 15.92                                  |
| Pink          | 252                | 23.31                                  |
| Purple        | 224                | 16.96                                  |
| Red           | 278                | 17.30                                  |
| Salmon        | 124                | 13.84                                  |
| Tan           | 679                | 28.48                                  |
| Turquoise     | 1512               | 44.03                                  |

**Table S3: Network preservation analysis between the MV and LAF groups – size and  $Z_{\text{summary}}$  scores of gene modules detected.**

| <b>Module</b> | <b>Module Size</b> | <b><math>Z_{\text{summary}}</math></b> |
|---------------|--------------------|----------------------------------------|
| Black         | 275                | 13.14                                  |
| Blue          | 964                | 39.26                                  |
| Brown         | 817                | 14.98                                  |
| Cyan          | 119                | 11.46                                  |
| Green         | 349                | 14.91                                  |
| Green-Yellow  | 215                | 20.99                                  |
| Magenta       | 239                | 18.58                                  |
| Midnight-Blue | 83                 | 13.87                                  |
| Pink          | 252                | 19.10                                  |
| Purple        | 224                | 8.80                                   |
| Red           | 278                | 16.62                                  |
| Salmon        | 124                | 11.57                                  |
| Tan           | 679                | 28.61                                  |
| Turquoise     | 1512               | 42.07                                  |

**Table S4: Proportion of variance explained by the principal components for each module.**

| <b>Dataset Group</b> | <b>Principal Component</b> | <b>Black</b> | <b>Blue</b> | <b>Brown</b> | <b>Cyan</b> | <b>Green</b> | <b>Green-Yellow</b> | <b>Magenta</b> |
|----------------------|----------------------------|--------------|-------------|--------------|-------------|--------------|---------------------|----------------|
| Mitral               | 1                          | 20.5%        | 22.2%       | 20.1%        | 21.8%       | 21.4%        | 22.8%               | 19.6%          |
|                      | 2                          | 4.1%         | 3.6%        | 4.8%         | 5.7%        | 4.5%         | 5.9%                | 3.9%           |
|                      | 3                          | 3.4%         | 3.1%        | 3.8%         | 4.4%        | 3.9%         | 3.7%                | 3.7%           |
| CAD                  | 1                          | 12.5%        | 18.6%       | 7.1%         | 16.8%       | 12.2%        | 20.3%               | 12.8%          |
|                      | 2                          | 6.0%         | 5.5%        | 5.0%         | 7.0%        | 5.5%         | 6.1%                | 6.4%           |
|                      | 3                          | 4.9%         | 4.1%        | 4.4%         | 6.5%        | 4.8%         | 4.4%                | 4.8%           |
| LAF                  | 1                          | 14.0%        | 16.6%       | 11.7%        | 14.3%       | 14.7%        | 20.8%               | 20.2%          |
|                      | 2                          | 8.9%         | 8.5%        | 7.6%         | 9.3%        | 7.3%         | 11.1%               | 6.9%           |
|                      | 3                          | 6.5%         | 6.3%        | 5.5%         | 8.2%        | 6.1%         | 5.3%                | 6.2%           |

| <b>Dataset Group</b> | <b>Principal Component</b> | <b>Midnight-Blue</b> | <b>Pink</b> | <b>Purple</b> | <b>Red</b> | <b>Salmon</b> | <b>Tan</b> | <b>Turquoise</b> |
|----------------------|----------------------------|----------------------|-------------|---------------|------------|---------------|------------|------------------|
| Mitral               | 1                          | 28.5%                | 22.6%       | 18.7%         | 20.5%      | 22.3%         | 19.0%      | 25.8%            |
|                      | 2                          | 4.6%                 | 6.0%        | 4.7%          | 4.1%       | 6.9%          | 4.0%       | 3.5%             |
|                      | 3                          | 4.2%                 | 4.2%        | 4.2%          | 3.5%       | 4.0%          | 3.6%       | 3.3%             |
| CAD                  | 1                          | 23.4%                | 17.1%       | 15.5%         | 15.0%      | 18.0%         | 14.6%      | 18.2%            |
|                      | 2                          | 7.4%                 | 8.6%        | 6.0%          | 6.4%       | 7.2%          | 5.8%       | 6.6%             |
|                      | 3                          | 5.1%                 | 5.4%        | 5.3%          | 5.4%       | 6.2%          | 5.1%       | 4.5%             |
| LAF                  | 1                          | 23.5%                | 18.4%       | 12.0%         | 15.9%      | 16.9%         | 13.7%      | 16.5%            |
|                      | 2                          | 7.9%                 | 8.5%        | 9.8%          | 9.4%       | 9.5%          | 9.1%       | 9.6%             |
|                      | 3                          | 6.7%                 | 7.0%        | 6.6%          | 6.0%       | 6.9%          | 6.8%       | 6.3%             |

**Table S5: Salmon module gene members and selected characteristics.**

| ILMN_ID*     | HGNC <sup>†</sup> | Chr. No. <sup>‡</sup> | kWithin <sup>§</sup> | MM <sup>  </sup> |
|--------------|-------------------|-----------------------|----------------------|------------------|
| ILMN_2367239 | RCAN1             | 21                    | 8.19                 | 0.81             |
| ILMN_1776998 | DNAJA4            | 15                    | 7.73                 | 0.81             |
| ILMN_2301722 | PDE8B             | 5                     | 7.65                 | 0.80             |
| ILMN_1738632 | PRKAR1A           | 17                    | 6.86                 | 0.76             |
| ILMN_1793549 | PTPN4             | 2                     | 6.74                 | 0.75             |
| ILMN_1716407 | SORBS2            | 4                     | 5.97                 | 0.68             |
| ILMN_1685156 | ADCY6             | 12                    | 5.73                 | 0.69             |
| ILMN_2355831 | FHL2              | 2                     | 5.71                 | 0.69             |
| ILMN_1689237 | BVES              | 6                     | 5.44                 | 0.65             |
| ILMN_2145116 | TMEM173           | 5                     | 5.28                 | 0.63             |
| ILMN_1792356 | DPYSL4            | 10                    | 5.14                 | 0.64             |
| ILMN_1733998 | DHRS9             | 2                     | 4.84                 | 0.67             |
| ILMN_1757877 | HCFC1R1           | 16                    | 4.56                 | -0.65            |
| ILMN_1815346 | TMEM136           | 11                    | 4.51                 | 0.63             |
| ILMN_1680196 | LAPTM4B           | 8                     | 4.50                 | 0.65             |
| ILMN_1765966 | CHGB              | 20                    | 4.48                 | 0.65             |
| ILMN_1657087 | ZNF385B           | 2                     | 4.42                 | 0.64             |
| ILMN_1796339 | PLEKHA2           | 8                     | 4.32                 | 0.59             |
| ILMN_1767422 | POLR1D            | 13                    | 4.32                 | -0.62            |
| ILMN_1802380 | RERE              | 1                     | 4.20                 | 0.54             |
| ILMN_1723874 | MRPS6             | 21                    | 4.13                 | 0.58             |
| ILMN_2152581 | STK38             | 6                     | 4.04                 | 0.62             |
| ILMN_1770206 | GEMIN4            | 17                    | 4.00                 | -0.59            |
| ILMN_1763568 | ZDHHC16           | 10                    | 3.93                 | 0.60             |
| ILMN_2186137 | RRAD              | 16                    | 3.85                 | 0.54             |
| ILMN_1843198 | AK4               | 1                     | 3.71                 | 0.56             |
| ILMN_2305544 | DBI               | 2                     | 3.59                 | 0.57             |
| ILMN_1669714 | MYH7              | 14                    | 3.17                 | 0.39             |
| ILMN_1813530 | AGT               | 1                     | 3.17                 | -0.52            |
| ILMN_1708204 | COPG1             | 3                     | 3.13                 | 0.56             |
| ILMN_1814022 | NR1H3             | 11                    | 3.01                 | -0.53            |
| ILMN_2397880 | CSTF3             | 11                    | 2.96                 | 0.52             |
| ILMN_1744949 | RHOBTB3           | 5                     | 2.88                 | 0.51             |
| ILMN_1780898 | PRKCH             | 14                    | 2.88                 | 0.54             |
| ILMN_1788095 | SPRYD3            | 12                    | 2.87                 | 0.48             |
| ILMN_1674402 | TMEM71            | 8                     | 2.82                 | 0.34             |
| ILMN_2119224 | KIFAP3            | 1                     | 2.80                 | 0.51             |
| ILMN_1735584 | ST8SIA5           | 18                    | 2.79                 | 0.41             |
| ILMN_1727194 | CALU              | 7                     | 2.70                 | 0.48             |
| ILMN_1719199 | TULP3             | 12                    | 2.66                 | -0.47            |
| ILMN_1771987 | SLC44A2           | 19                    | 2.65                 | -0.53            |
| ILMN_1661194 | CLDN14            | 21                    | 2.64                 | -0.52            |

|              |          |    |      |       |
|--------------|----------|----|------|-------|
| ILMN_1810725 | FAM129A  | 1  | 2.62 | -0.46 |
| ILMN_1780667 | POC1A    | 3  | 2.54 | 0.49  |
| ILMN_1807455 | DHRS7    | 14 | 2.53 | -0.48 |
| ILMN_1708743 | NT5DC2   | 3  | 2.50 | -0.45 |
| ILMN_1674236 | HSPB1    | 7  | 2.49 | -0.45 |
| ILMN_1671106 | GJA4     | 1  | 2.46 | 0.49  |
| ILMN_2351466 | NTM      | 11 | 2.42 | -0.50 |
| ILMN_1682799 | STAMBPL1 | 10 | 2.42 | 0.41  |
| ILMN_1699489 | TUBB6    | 18 | 2.41 | 0.47  |
| ILMN_1814333 | SERPINI1 | 3  | 2.39 | 0.49  |
| ILMN_1752755 | VWF      | 12 | 2.38 | 0.45  |
| ILMN_1738147 | NES      | 1  | 2.35 | 0.36  |
| ILMN_1794213 | ABHD14A  | 3  | 2.34 | -0.50 |
| ILMN_1680314 | TXN      | 9  | 2.29 | -0.43 |
| ILMN_2320250 | NOL6     | 9  | 2.25 | 0.48  |
| ILMN_1690880 | CTAGE5   | 14 | 2.25 | 0.42  |
| ILMN_1773865 | HSPA5    | 9  | 2.24 | -0.47 |
| ILMN_2054607 | CYP4V2   | 4  | 2.22 | -0.46 |
| ILMN_1708081 | LCLAT1   | 2  | 2.16 | 0.44  |
| ILMN_1739586 | FEZ2     | 2  | 2.13 | 0.40  |
| ILMN_1734353 | GPX4     | 19 | 2.11 | -0.43 |
| ILMN_1694111 | PNKP     | 19 | 2.10 | 0.45  |
| ILMN_1691090 | MPV17    | 2  | 2.08 | 0.47  |
| ILMN_1715684 | LAMB3    | 1  | 2.08 | 0.37  |
| ILMN_1669851 | STAG3L4  | 7  | 2.04 | 0.46  |
| ILMN_2185845 | BRSK1    | 19 | 2.04 | 0.44  |
| ILMN_1714159 | LUZP1    | 1  | 2.01 | 0.45  |
| ILMN_1758939 | RIPK2    | 8  | 1.95 | 0.42  |
| ILMN_1740742 | UROD     | 1  | 1.90 | -0.37 |
| ILMN_1683462 | GSS      | 20 | 1.89 | 0.44  |
| ILMN_2230025 | PDLIM3   | 4  | 1.87 | 0.38  |
| ILMN_1774432 | DTD1     | 20 | 1.87 | 0.44  |
| ILMN_1665212 | EDC4     | 16 | 1.85 | 0.37  |
| ILMN_1653861 | SCMH1    | 1  | 1.84 | -0.43 |
| ILMN_1704206 | NPSR1    | 7  | 1.83 | 0.43  |
| ILMN_1778347 | NUDT2    | 9  | 1.82 | -0.45 |
| ILMN_1695797 | NCOA6    | 20 | 1.79 | -0.41 |
| ILMN_1662880 | C5orf27  | 5  | 1.79 | -0.40 |
| ILMN_1661376 | GRIK2    | 6  | 1.75 | 0.41  |
| ILMN_1800733 | MANBA    | 4  | 1.66 | -0.42 |
| ILMN_1766925 | CDH13    | 16 | 1.65 | -0.42 |
| ILMN_1682273 | SHISA3   | 4  | 1.65 | -0.40 |
| ILMN_1660232 | PEX5     | 12 | 1.61 | -0.40 |
| ILMN_1774207 | ANGPT2   | 8  | 1.58 | 0.38  |
| ILMN_1803788 | LGALS3   | 14 | 1.55 | -0.37 |

|              |           |    |      |       |
|--------------|-----------|----|------|-------|
| ILMN_1664608 | INPP5A    | 10 | 1.53 | 0.39  |
| ILMN_2143250 | FAR1      | 11 | 1.51 | -0.37 |
| ILMN_1690342 | LTA4H     | 12 | 1.51 | -0.38 |
| ILMN_1689989 | CDC42BPB  | 14 | 1.49 | 0.37  |
| ILMN_1785857 | ISY1      | 3  | 1.46 | 0.32  |
| ILMN_1748438 | POLR2G    | 11 | 1.45 | -0.39 |
| ILMN_1706957 | BMP1A     | 10 | 1.41 | -0.34 |
| ILMN_1716089 | KANK2     | 19 | 1.40 | -0.32 |
| ILMN_1687743 | BTBD7     | 14 | 1.38 | -0.33 |
| ILMN_2153332 | ATXN1     | 6  | 1.36 | -0.38 |
| ILMN_1756006 | ATG2A     | 11 | 1.34 | -0.35 |
| ILMN_1679460 | PPFIBP1   | 12 | 1.32 | 0.35  |
| ILMN_2406552 | PIDD      | 11 | 1.31 | -0.37 |
| ILMN_2049727 | C20orf111 | 20 | 1.30 | -0.37 |
| ILMN_1654893 | SCAMP2    | 15 | 1.30 | -0.36 |
| ILMN_1723843 | CSNK2A2   | 16 | 1.27 | -0.27 |
| ILMN_1724897 | C14orf93  | 14 | 1.25 | -0.33 |
| ILMN_1685170 | ANXA11    | 10 | 1.18 | 0.26  |
| ILMN_1730940 | KLHDC3    | 6  | 1.16 | -0.32 |
| ILMN_1659874 | SCAF4     | 21 | 1.13 | 0.25  |
| ILMN_1729767 | TARBP2    | 12 | 1.12 | -0.32 |
| ILMN_1705261 | CAPN1     | 11 | 1.11 | -0.35 |
| ILMN_1672496 | DNAJA1    | 9  | 1.11 | 0.34  |
| ILMN_2370772 | EIF4G1    | 3  | 1.07 | 0.34  |
| ILMN_1728528 | ZNF655    | 7  | 1.06 | -0.34 |
| ILMN_1804735 | CBS       | 21 | 1.04 | -0.31 |
| ILMN_1808821 | COMMD9    | 11 | 1.04 | -0.31 |
| ILMN_1715416 | NUP188    | 9  | 1.03 | 0.28  |
| ILMN_1658182 | MEX3C     | 18 | 0.98 | -0.30 |
| ILMN_1798177 | CHURC1    | 14 | 0.96 | -0.27 |
| ILMN_1760778 | ENG       | 9  | 0.94 | 0.22  |
| ILMN_2389582 | HNRNPL    | 19 | 0.83 | 0.26  |
| ILMN_1810225 | UVSSA     | 4  | 0.81 | -0.26 |
| ILMN_1710962 | TMEM97    | 17 | 0.78 | -0.29 |
| ILMN_2192385 | TTC19     | 17 | 0.72 | 0.29  |
| ILMN_1750664 | PPT2      | 6  | 0.61 | 0.20  |
| ILMN_1684647 | ILKAP     | 2  | 0.58 | -0.24 |

\*ILMN\_ID – Probe Illumina ID

†HGNC – HGNC symbol

‡Chr. No. – Chromosome number

§kWithin – Intramodular connectivity

||MM – Module membership

**Table S6: Tan module gene members and selected characteristics.**

| ILMN_ID*     | HGNC <sup>†</sup> | Chr. No. <sup>‡</sup> | kWithin <sup>§</sup> | MM <sup>  </sup> |
|--------------|-------------------|-----------------------|----------------------|------------------|
| ILMN_1755954 | CPEB3             | 10                    | 43.35                | 0.85             |
| ILMN_1689515 | CPLX3             | 15                    | 42.47                | 0.84             |
| ILMN_1733627 | NEDD4L            | 18                    | 40.80                | 0.83             |
| ILMN_1762207 | SGSM1             | 22                    | 40.68                | 0.82             |
| ILMN_2050255 | UCKL1             | 20                    | 39.03                | 0.81             |
| ILMN_1715463 | SOSTDC1           | 7                     | 37.16                | 0.79             |
| ILMN_2366388 | PRDX1             | 1                     | 35.50                | 0.76             |
| ILMN_1791366 | RCOR2             | 11                    | 35.43                | 0.78             |
| ILMN_1763382 | NPPB              | 1                     | 35.25                | -0.78            |
| ILMN_1773650 | LRRN3             | 7                     | 34.63                | 0.75             |
| ILMN_1789171 | EEF2K             | 16                    | 33.64                | 0.77             |
| ILMN_1655915 | MMP11             | 22                    | 32.44                | 0.76             |
| ILMN_1696537 | DDIT4L            | 4                     | 32.23                | 0.73             |
| ILMN_1712998 | CORIN             | 4                     | 32.18                | 0.75             |
| ILMN_2352131 | ERBB2             | 17                    | 32.01                | 0.75             |
| ILMN_1709634 | CMBL              | 5                     | 31.83                | 0.75             |
| ILMN_1806692 | HEXB              | 5                     | 30.94                | -0.71            |
| ILMN_1668072 | PGAM2             | 7                     | 30.90                | 0.73             |
| ILMN_2227968 | NTHL1             | 16                    | 30.74                | 0.75             |
| ILMN_2046611 | MCOLN3            | 1                     | 29.79                | 0.72             |
| ILMN_1674817 | C1orf115          | 1                     | 29.72                | 0.73             |
| ILMN_1791847 | DAPK2             | 15                    | 28.62                | 0.71             |
| ILMN_2227790 | GRIN2C            | 17                    | 28.58                | 0.69             |
| ILMN_2104295 | TMEM178           | 2                     | 28.54                | 0.72             |
| ILMN_1696767 | SERP2             | 13                    | 27.84                | 0.70             |
| ILMN_2406106 | CACNB2            | 10                    | 27.66                | 0.70             |
| ILMN_1655614 | DSP               | 6                     | 27.37                | 0.70             |
| ILMN_1807767 | KIAA0182          | 16                    | 27.28                | 0.70             |
| ILMN_1733811 | JUP               | 17                    | 27.14                | 0.70             |
| ILMN_1701875 | ZYX               | 7                     | 27.09                | -0.69            |
| ILMN_2104106 | XPR1              | 1                     | 26.61                | -0.69            |
| ILMN_2321416 | DIAPH1            | 5                     | 26.54                | -0.70            |
| ILMN_1661264 | SHMT2             | 12                    | 26.49                | -0.68            |
| ILMN_1779071 | FEZ1              | 11                    | 26.25                | 0.64             |
| ILMN_2329114 | COLQ              | 3                     | 26.18                | -0.64            |
| ILMN_1684865 | GPR22             | 7                     | 26.11                | 0.67             |
| ILMN_1793630 | SLC4A3            | 2                     | 26.10                | 0.67             |
| ILMN_1743373 | DLL1              | 6                     | 25.84                | 0.69             |
| ILMN_1752932 | MPZL2             | 11                    | 25.75                | -0.69            |
| ILMN_2056606 | PPP1R1A           | 12                    | 25.72                | 0.67             |
| ILMN_1653220 | PITPNM1           | 11                    | 25.30                | -0.66            |
| ILMN_1718621 | TSPAN32           | 11                    | 25.15                | 0.69             |

|              |          |    |       |       |
|--------------|----------|----|-------|-------|
| ILMN_1714737 | ASF1A    | 6  | 25.04 | 0.68  |
| ILMN_1667716 | TMEM101  | 17 | 24.84 | 0.69  |
| ILMN_1716019 | RHBDL3   | 17 | 24.81 | 0.67  |
| ILMN_1757807 | AGXT2L1  | 4  | 24.61 | 0.65  |
| ILMN_1750181 | TESC     | 12 | 24.52 | 0.65  |
| ILMN_1811102 | LRSAM1   | 9  | 24.50 | 0.67  |
| ILMN_1787691 | CITED4   | 1  | 24.10 | 0.65  |
| ILMN_1804150 | HIBADH   | 7  | 23.96 | 0.66  |
| ILMN_1780036 | WDR1     | 4  | 23.85 | -0.65 |
| ILMN_1723971 | SLC29A1  | 6  | 23.85 | 0.67  |
| ILMN_1786197 | NR2F1    | 5  | 23.77 | 0.66  |
| ILMN_1741727 | QPCT     | 2  | 23.74 | -0.65 |
| ILMN_1767960 | NSUN7    | 4  | 23.59 | 0.66  |
| ILMN_1750912 | STXBP6   | 14 | 23.48 | 0.64  |
| ILMN_1673682 | GATAD2A  | 19 | 23.41 | -0.66 |
| ILMN_1713901 | KDELR3   | 22 | 23.23 | -0.63 |
| ILMN_1692785 | KLHL21   | 1  | 23.12 | 0.65  |
| ILMN_1711030 | OPLAH    | 8  | 22.49 | 0.64  |
| ILMN_1753639 | MTAP     | 9  | 22.47 | 0.64  |
| ILMN_1767848 | PCMTD2   | 20 | 22.46 | 0.64  |
| ILMN_1699644 | MARCH3   | 5  | 22.40 | -0.65 |
| ILMN_2063925 | CTNNB1   | 20 | 22.23 | 0.64  |
| ILMN_1682139 | RAI14    | 5  | 22.17 | -0.65 |
| ILMN_1729455 | EML1     | 14 | 21.99 | 0.65  |
| ILMN_1785175 | SWAP70   | 11 | 21.97 | -0.62 |
| ILMN_1808487 | PLA2G12B | 10 | 21.88 | 0.61  |
| ILMN_1810274 | HOXB2    | 17 | 21.79 | -0.60 |
| ILMN_1753010 | PET112   | 4  | 21.64 | 0.61  |
| ILMN_1793859 | ALDH2    | 12 | 21.62 | 0.62  |
| ILMN_1713162 | GSTM2    | 1  | 21.33 | 0.63  |
| ILMN_1687301 | VCAN     | 5  | 21.22 | -0.61 |
| ILMN_1696675 | CES2     | 16 | 21.00 | -0.60 |
| ILMN_1797475 | FAM216B  | 13 | 20.93 | 0.62  |
| ILMN_1807710 | HINT1    | 5  | 20.74 | 0.60  |
| ILMN_1729980 | RNF216   | 7  | 20.65 | -0.56 |
| ILMN_2191313 | FAM21A   | 10 | 20.51 | 0.61  |
| ILMN_1656682 | AZIN1    | 8  | 20.50 | -0.58 |
| ILMN_1694432 | CRIP2    | 14 | 20.44 | 0.58  |
| ILMN_1657515 | RPS6KA5  | 14 | 20.31 | 0.64  |
| ILMN_1766499 | HSPA2    | 14 | 20.26 | -0.61 |
| ILMN_1789058 | RNF207   | 1  | 20.11 | 0.60  |
| ILMN_1772605 | FRS3     | 6  | 20.10 | 0.62  |
| ILMN_1715927 | VSTM2L   | 20 | 20.02 | 0.59  |
| ILMN_1718769 | ITSN1    | 21 | 19.81 | 0.60  |
| ILMN_1801205 | GPNMB    | 7  | 19.73 | -0.62 |

|              |          |    |       |       |
|--------------|----------|----|-------|-------|
| ILMN_2214098 | BIVM     | 13 | 19.71 | 0.61  |
| ILMN_2383611 | PTPRE    | 10 | 19.69 | -0.59 |
| ILMN_1691572 | TST      | 22 | 19.52 | 0.61  |
| ILMN_1790173 | COL28A1  | 7  | 19.51 | 0.61  |
| ILMN_1705231 | SLCO2A1  | 3  | 19.20 | -0.60 |
| ILMN_1719518 | ARF4     | 3  | 19.11 | -0.58 |
| ILMN_1707695 | IFIT1    | 10 | 18.99 | 0.60  |
| ILMN_1678730 | NOMO1    | 16 | 18.93 | 0.59  |
| ILMN_1796216 | VASH1    | 14 | 18.90 | -0.57 |
| ILMN_1689001 | CDK4     | 12 | 18.79 | -0.60 |
| ILMN_2402640 | DSC1     | 18 | 18.72 | 0.58  |
| ILMN_2371379 | ACLY     | 17 | 18.62 | -0.60 |
| ILMN_2148819 | TUBA1A   | 12 | 18.52 | -0.58 |
| ILMN_1671568 | ECHDC2   | 1  | 18.49 | 0.59  |
| ILMN_1658499 | SYT13    | 11 | 18.20 | 0.56  |
| ILMN_1730670 | FSTL3    | 19 | 18.12 | -0.57 |
| ILMN_1735996 | NOX4     | 11 | 18.10 | -0.58 |
| ILMN_2115125 | CTGF     | 6  | 18.09 | -0.58 |
| ILMN_2326713 | CD151    | 11 | 18.05 | -0.58 |
| ILMN_1653028 | COL4A1   | 13 | 18.04 | -0.57 |
| ILMN_2343048 | ABCB9    | 12 | 17.93 | 0.58  |
| ILMN_1695276 | MAPRE2   | 18 | 17.91 | -0.58 |
| ILMN_1702501 | RPS6KA2  | 6  | 17.88 | -0.53 |
| ILMN_1800447 | PHKB     | 16 | 17.88 | 0.59  |
| ILMN_1705049 | TMEM67   | 8  | 17.83 | 0.56  |
| ILMN_1656940 | ABLIM3   | 5  | 17.71 | 0.56  |
| ILMN_1684352 | TRIM45   | 1  | 17.68 | 0.59  |
| ILMN_1776519 | RAP1GAP  | 1  | 17.67 | 0.57  |
| ILMN_1810100 | PBX3     | 9  | 17.44 | 0.57  |
| ILMN_1657744 | FAM219B  | 15 | 17.41 | 0.57  |
| ILMN_1678037 | HIRIP3   | 16 | 17.38 | 0.55  |
| ILMN_1657373 | LEPREL1  | 3  | 17.31 | -0.53 |
| ILMN_1801616 | EMP1     | 12 | 17.28 | -0.57 |
| ILMN_1690040 | TM7SF2   | 11 | 16.84 | 0.53  |
| ILMN_2197128 | OSR1     | 2  | 16.54 | 0.55  |
| ILMN_1658333 | ECM1     | 1  | 16.52 | -0.56 |
| ILMN_1681591 | PTPN1    | 20 | 16.52 | -0.56 |
| ILMN_1751028 | SERPINH1 | 11 | 16.47 | -0.56 |
| ILMN_1693338 | CYP1B1   | 2  | 16.42 | -0.55 |
| ILMN_2387090 | CGGBP1   | 3  | 16.41 | -0.56 |
| ILMN_1738652 | BAD      | 11 | 16.35 | 0.56  |
| ILMN_1770548 | CLASP2   | 3  | 16.34 | 0.57  |
| ILMN_1784217 | SOX15    | 17 | 16.31 | 0.51  |
| ILMN_1808202 | R3HDM4   | 19 | 16.27 | -0.57 |
| ILMN_1778240 | GFOD1    | 6  | 16.26 | 0.54  |

|              |               |    |       |       |
|--------------|---------------|----|-------|-------|
| ILMN_1681515 | CRLF1         | 19 | 16.11 | -0.57 |
| ILMN_1711089 | DNAJC21       | 5  | 16.06 | 0.52  |
| ILMN_1759513 | RND3          | 2  | 16.04 | -0.54 |
| ILMN_1768662 | UCK2          | 1  | 15.97 | -0.55 |
| ILMN_1726928 | TCEA3         | 1  | 15.97 | 0.54  |
| ILMN_1659688 | LGALS3BP      | 17 | 15.76 | 0.55  |
| ILMN_1666894 | CSPG4         | 15 | 15.73 | -0.53 |
| ILMN_2064725 | METTTL7B      | 12 | 15.69 | 0.54  |
| ILMN_2343278 | PPAP2A        | 5  | 15.59 | -0.54 |
| ILMN_1703955 | FBXO32        | 8  | 15.44 | 0.51  |
| ILMN_1686116 | THBS1         | 15 | 15.39 | -0.54 |
| ILMN_1675797 | EPDR1         | 7  | 15.30 | 0.55  |
| ILMN_1737988 | PRNP          | 20 | 15.29 | 0.54  |
| ILMN_2404049 | RBM38         | 20 | 15.24 | 0.54  |
| ILMN_1793002 | C20orf196     | 20 | 15.22 | 0.54  |
| ILMN_1787648 | GPR125        | 4  | 15.16 | 0.54  |
| ILMN_1762466 | BBS4          | 15 | 15.14 | 0.54  |
| ILMN_1717599 | CNTN3         | 3  | 15.08 | 0.53  |
| ILMN_1655884 | ATP2A2        | 12 | 15.01 | 0.50  |
| ILMN_1656186 | SLC41A1       | 1  | 15.00 | 0.50  |
| ILMN_1772612 | ANGPTL2       | 9  | 14.99 | -0.45 |
| ILMN_1761566 | CYSTEM1       | 5  | 14.93 | -0.53 |
| ILMN_1688242 | C6            | 5  | 14.91 | 0.52  |
| ILMN_1785732 | TNFAIP6       | 2  | 14.88 | -0.50 |
| ILMN_1813175 | LPHN1         | 19 | 14.87 | 0.52  |
| ILMN_1720344 | NIPA2         | 15 | 14.84 | -0.52 |
| ILMN_1665331 | AMT           | 3  | 14.76 | 0.55  |
| ILMN_1715384 | B3GNT1        | 11 | 14.74 | 0.53  |
| ILMN_1742330 | PLXNB1        | 3  | 14.72 | 0.55  |
| ILMN_1705390 | KLHL22        | 22 | 14.72 | 0.52  |
| ILMN_1791967 | C20orf166-AS1 | 20 | 14.64 | 0.51  |
| ILMN_1732060 | ARHGAP1       | 11 | 14.62 | -0.53 |
| ILMN_1809101 | STEAP2        | 7  | 14.58 | 0.53  |
| ILMN_2110252 | NPM3          | 10 | 14.57 | -0.52 |
| ILMN_1741133 | NME1          | 17 | 14.40 | -0.51 |
| ILMN_1792389 | RNF165        | 18 | 14.27 | 0.52  |
| ILMN_1803256 | STOX2         | 4  | 14.16 | 0.52  |
| ILMN_1692072 | CENPBD1       | 16 | 14.12 | 0.51  |
| ILMN_1719143 | APOBEC2       | 6  | 14.11 | 0.49  |
| ILMN_1793732 | FARS2         | 6  | 14.06 | 0.50  |
| ILMN_2376958 | TBX5          | 12 | 13.87 | 0.53  |
| ILMN_1718193 | MYLK3         | 16 | 13.78 | 0.48  |
| ILMN_1654118 | BCL2L1        | 20 | 13.77 | -0.50 |
| ILMN_2116127 | NPEPPS        | 17 | 13.74 | 0.50  |
| ILMN_1660063 | POLE4         | 2  | 13.72 | -0.50 |

|              |           |    |       |       |
|--------------|-----------|----|-------|-------|
| ILMN_1665871 | ANGEL1    | 14 | 13.65 | 0.52  |
| ILMN_2210934 | NR3C2     | 4  | 13.58 | 0.50  |
| ILMN_1704353 | IGSF3     | 1  | 13.56 | 0.50  |
| ILMN_1716488 | PACS1     | 11 | 13.55 | -0.50 |
| ILMN_1662470 | C10orf35  | 10 | 13.46 | 0.51  |
| ILMN_1733690 | AKAP7     | 6  | 13.35 | 0.52  |
| ILMN_1660793 | PAQR4     | 16 | 13.32 | -0.50 |
| ILMN_1804007 | NANOS3    | 19 | 13.26 | 0.53  |
| ILMN_1736078 | THBS4     | 5  | 13.17 | -0.50 |
| ILMN_1694426 | ROR2      | 9  | 13.17 | 0.50  |
| ILMN_1730487 | CALD1     | 7  | 13.13 | -0.45 |
| ILMN_2153373 | LRBA      | 4  | 13.11 | 0.48  |
| ILMN_1654639 | HERC6     | 4  | 13.09 | 0.51  |
| ILMN_1686968 | ZNF362    | 1  | 13.06 | 0.49  |
| ILMN_1733515 | LOXL3     | 2  | 13.04 | -0.51 |
| ILMN_1665945 | ACBD3     | 1  | 12.98 | -0.49 |
| ILMN_1743655 | TMED9     | 5  | 12.91 | -0.49 |
| ILMN_2395043 | HSPA4     | 5  | 12.81 | -0.50 |
| ILMN_1680781 | C14orf135 | 14 | 12.80 | -0.48 |
| ILMN_2289924 | TRAK1     | 3  | 12.72 | 0.46  |
| ILMN_1653133 | SH3D19    | 4  | 12.70 | -0.48 |
| ILMN_2302118 | CCDC50    | 3  | 12.47 | -0.48 |
| ILMN_1652065 | KCNMB1    | 5  | 12.46 | -0.46 |
| ILMN_1738173 | METTL4    | 18 | 12.45 | 0.51  |
| ILMN_1804737 | RAVER2    | 1  | 12.34 | 0.48  |
| ILMN_1789463 | FXD1      | 19 | 12.32 | 0.49  |
| ILMN_1687315 | RXRA      | 9  | 12.22 | 0.49  |
| ILMN_1679919 | ASCC2     | 22 | 12.18 | -0.49 |
| ILMN_1796210 | PPRC1     | 10 | 12.18 | -0.48 |
| ILMN_2336094 | ODZ3      | 4  | 12.15 | 0.49  |
| ILMN_1676984 | DDIT3     | 12 | 12.12 | 0.45  |
| ILMN_1680353 | NSF       | 17 | 12.10 | -0.47 |
| ILMN_1751072 | SRPRB     | 3  | 12.08 | -0.48 |
| ILMN_1679428 | CHIC2     | 4  | 12.04 | -0.48 |
| ILMN_2386818 | URGCP     | 7  | 12.04 | 0.47  |
| ILMN_1687978 | PHLDA1    | 12 | 12.02 | -0.47 |
| ILMN_1781560 | ST3GAL6   | 3  | 12.00 | -0.45 |
| ILMN_1767446 | RNF150    | 4  | 11.90 | 0.44  |
| ILMN_1666503 | DENND2A   | 7  | 11.89 | 0.47  |
| ILMN_1718070 | CASP9     | 1  | 11.87 | 0.50  |
| ILMN_2283325 | WLS       | 1  | 11.86 | 0.46  |
| ILMN_1731064 | ADCK3     | 1  | 11.82 | 0.43  |
| ILMN_2232177 | ACTN1     | 14 | 11.78 | -0.47 |
| ILMN_2041577 | SLC52A2   | 8  | 11.77 | -0.49 |
| ILMN_1723021 | ICMT      | 1  | 11.70 | -0.48 |

|              |           |    |       |       |
|--------------|-----------|----|-------|-------|
| ILMN_1753582 | RPA2      | 1  | 11.66 | 0.48  |
| ILMN_1725746 | CARNS1    | 11 | 11.64 | 0.45  |
| ILMN_2220187 | GFPT1     | 2  | 11.63 | -0.48 |
| ILMN_1747303 | DDX39A    | 19 | 11.63 | -0.48 |
| ILMN_2357730 | CDK20     | 9  | 11.63 | 0.47  |
| ILMN_1747227 | ADORA1    | 1  | 11.60 | 0.44  |
| ILMN_1807031 | C14orf28  | 14 | 11.60 | 0.46  |
| ILMN_1680652 | SELENBP1  | 1  | 11.59 | 0.49  |
| ILMN_1770412 | AHCYL1    | 1  | 11.57 | -0.47 |
| ILMN_1751559 | TMEM204   | 16 | 11.56 | -0.47 |
| ILMN_1702691 | TNFAIP3   | 6  | 11.50 | -0.47 |
| ILMN_1782688 | THNSL1    | 10 | 11.48 | 0.43  |
| ILMN_1765146 | IFNAR2    | 21 | 11.45 | -0.47 |
| ILMN_2410772 | KEAP1     | 19 | 11.45 | 0.46  |
| ILMN_1712944 | AES       | 19 | 11.44 | 0.47  |
| ILMN_1775170 | MT1X      | 16 | 11.42 | 0.44  |
| ILMN_2364022 | SLC16A3   | 17 | 11.41 | -0.46 |
| ILMN_2144088 | FDFT1     | 8  | 11.38 | 0.49  |
| ILMN_1800261 | TUBA1B    | 12 | 11.36 | -0.47 |
| ILMN_1755589 | DIP2B     | 12 | 11.34 | -0.47 |
| ILMN_1769409 | C9orf123  | 9  | 11.34 | 0.46  |
| ILMN_1682326 | PCP4      | 21 | 11.26 | 0.46  |
| ILMN_1693951 | C14orf180 | 14 | 11.19 | 0.45  |
| ILMN_1720771 | STX11     | 6  | 11.18 | -0.45 |
| ILMN_1671693 | TPGS2     | 18 | 11.16 | 0.39  |
| ILMN_2047599 | TMEM50B   | 21 | 11.15 | 0.46  |
| ILMN_1736828 | CHST10    | 2  | 11.11 | 0.45  |
| ILMN_1712975 | YIF1A     | 11 | 11.11 | -0.45 |
| ILMN_1806533 | PDE7B     | 6  | 11.08 | 0.44  |
| ILMN_1790026 | SFRP5     | 10 | 11.06 | 0.42  |
| ILMN_1873621 | NTN1      | 17 | 11.06 | 0.45  |
| ILMN_2334042 | THYN1     | 11 | 11.03 | 0.47  |
| ILMN_2378376 | CYB561    | 17 | 11.02 | 0.47  |
| ILMN_1812856 | ZSWIM1    | 20 | 11.01 | 0.46  |
| ILMN_1808590 | GUCY1A3   | 4  | 10.97 | 0.47  |
| ILMN_1805543 | ADAMTS9   | 3  | 10.97 | -0.46 |
| ILMN_2215119 | SYNJ2     | 6  | 10.95 | -0.45 |
| ILMN_2308849 | MYADM     | 19 | 10.94 | -0.43 |
| ILMN_1690487 | PCM1      | 8  | 10.91 | 0.42  |
| ILMN_1682147 | HOOK2     | 19 | 10.88 | -0.47 |
| ILMN_1734742 | ARHGDI A  | 17 | 10.87 | -0.46 |
| ILMN_2378100 | FBXL5     | 4  | 10.83 | 0.44  |
| ILMN_2120210 | RCAN2     | 6  | 10.82 | 0.44  |
| ILMN_1726368 | ZNF135    | 19 | 10.77 | 0.48  |
| ILMN_2224486 | C3orf14   | 3  | 10.77 | -0.44 |

|              |            |    |       |       |
|--------------|------------|----|-------|-------|
| ILMN_1667748 | ANKRD33    | 12 | 10.70 | -0.44 |
| ILMN_1733176 | LIMS1      | 2  | 10.67 | -0.43 |
| ILMN_1792679 | ITGA5      | 12 | 10.66 | -0.46 |
| ILMN_2201678 | FSTL1      | 3  | 10.61 | -0.45 |
| ILMN_1745041 | TCF15      | 20 | 10.58 | 0.44  |
| ILMN_1695719 | EIF2C2     | 8  | 10.57 | -0.46 |
| ILMN_2047112 | DPCD       | 10 | 10.54 | 0.45  |
| ILMN_1803180 | PRDX6      | 1  | 10.53 | 0.43  |
| ILMN_1662658 | PUS1       | 12 | 10.49 | -0.44 |
| ILMN_1727001 | DDX46      | 5  | 10.47 | 0.43  |
| ILMN_1721457 | RANBP1     | 22 | 10.46 | -0.44 |
| ILMN_1795300 | ARHGEF37   | 5  | 10.45 | 0.45  |
| ILMN_1733221 | SEMA4D     | 9  | 10.44 | 0.43  |
| ILMN_1783546 | CARKD      | 13 | 10.40 | 0.46  |
| ILMN_2149164 | SFRP1      | 8  | 10.38 | 0.41  |
| ILMN_1787251 | DAAM1      | 14 | 10.36 | 0.44  |
| ILMN_1766408 | CBFB       | 16 | 10.36 | -0.43 |
| ILMN_1671911 | MTA1       | 14 | 10.36 | 0.39  |
| ILMN_1723706 | GRAMD4     | 22 | 10.35 | 0.36  |
| ILMN_2047676 | OSGEPL1    | 2  | 10.30 | 0.44  |
| ILMN_1811178 | SCAPER     | 15 | 10.29 | 0.44  |
| ILMN_1682781 | TEAD2      | 19 | 10.28 | 0.36  |
| ILMN_1673820 | HLTF       | 3  | 10.26 | 0.43  |
| ILMN_1694514 | ZDHHC11    | 5  | 10.25 | 0.44  |
| ILMN_1672589 | SEMA4B     | 15 | 10.25 | 0.43  |
| ILMN_1734445 | PKDCC      | 2  | 10.22 | 0.45  |
| ILMN_1721901 | CTNNAL1    | 9  | 10.21 | 0.37  |
| ILMN_1738494 | AQP7       | 9  | 10.19 | 0.44  |
| ILMN_1783304 | ATP1B3     | 3  | 10.15 | -0.44 |
| ILMN_2052208 | GADD45A    | 1  | 10.15 | -0.45 |
| ILMN_1718177 | CYP20A1    | 2  | 10.11 | -0.45 |
| ILMN_1693740 | DNAJC3-AS1 | 13 | 10.06 | 0.43  |
| ILMN_2388155 | CASP3      | 4  | 10.06 | -0.42 |
| ILMN_2399896 | SEC31A     | 4  | 10.04 | -0.45 |
| ILMN_1747577 | ALAD       | 9  | 10.00 | 0.42  |
| ILMN_2049303 | ECI1       | 16 | 9.98  | 0.43  |
| ILMN_1723684 | DARC       | 1  | 9.96  | -0.41 |
| ILMN_2335718 | HNRNPAB    | 5  | 9.83  | -0.44 |
| ILMN_2399310 | MLLT10     | 10 | 9.81  | 0.42  |
| ILMN_1735461 | DDX21      | 10 | 9.80  | -0.42 |
| ILMN_1771957 | MAN1B1     | 9  | 9.77  | 0.40  |
| ILMN_1656501 | DUSP5      | 10 | 9.74  | -0.38 |
| ILMN_2050813 | CLGN       | 4  | 9.70  | 0.41  |
| ILMN_1674135 | RALGPS1    | 9  | 9.67  | 0.43  |
| ILMN_2139761 | LIMCH1     | 4  | 9.66  | 0.43  |

|              |          |    |      |       |
|--------------|----------|----|------|-------|
| ILMN_1787718 | SLC27A1  | 19 | 9.61 | 0.42  |
| ILMN_1784785 | COPS7B   | 2  | 9.61 | 0.42  |
| ILMN_1726288 | TMEM106B | 7  | 9.58 | 0.45  |
| ILMN_2118472 | FAM213A  | 10 | 9.53 | 0.43  |
| ILMN_1741032 | HERC3    | 4  | 9.51 | 0.43  |
| ILMN_1811921 | CSRP1    | 1  | 9.49 | -0.44 |
| ILMN_1724333 | TOR1B    | 9  | 9.47 | -0.43 |
| ILMN_1780698 | ZFYVE19  | 15 | 9.47 | 0.44  |
| ILMN_1770356 | POLRMT   | 19 | 9.44 | 0.43  |
| ILMN_1813400 | CBR4     | 4  | 9.38 | 0.38  |
| ILMN_1767263 | FUBP3    | 9  | 9.31 | 0.41  |
| ILMN_1764431 | COPS6    | 7  | 9.28 | 0.40  |
| ILMN_1796900 | NUDCD3   | 7  | 9.16 | 0.40  |
| ILMN_1706539 | KDM3B    | 5  | 9.15 | 0.45  |
| ILMN_1662795 | CA2      | 8  | 9.12 | -0.41 |
| ILMN_1685703 | ACOX2    | 3  | 9.04 | 0.42  |
| ILMN_1704154 | TNFRSF19 | 13 | 9.03 | 0.38  |
| ILMN_1707326 | TASP1    | 20 | 9.02 | -0.43 |
| ILMN_1704795 | MARK3    | 14 | 9.00 | 0.40  |
| ILMN_2224143 | MCM3     | 6  | 8.92 | 0.41  |
| ILMN_1707372 | RNF187   | 1  | 8.88 | 0.40  |
| ILMN_2180682 | MTPN     | 7  | 8.87 | -0.39 |
| ILMN_1786278 | FAM149A  | 4  | 8.87 | 0.40  |
| ILMN_1785756 | H2AFX    | 11 | 8.81 | -0.45 |
| ILMN_1715189 | LHX6     | 9  | 8.79 | -0.39 |
| ILMN_1679725 | PCYOX1   | 2  | 8.79 | 0.40  |
| ILMN_1668514 | PIP5K1C  | 19 | 8.77 | -0.39 |
| ILMN_2120555 | ADCY1    | 7  | 8.76 | 0.39  |
| ILMN_1674661 | CIRBP    | 19 | 8.76 | 0.40  |
| ILMN_2306955 | ACPL2    | 3  | 8.70 | -0.36 |
| ILMN_1773741 | GOLGA5   | 14 | 8.68 | -0.42 |
| ILMN_2175447 | ZNF767   | 7  | 8.64 | 0.40  |
| ILMN_1754045 | FANCL    | 2  | 8.62 | 0.41  |
| ILMN_2325347 | B3GALNT1 | 3  | 8.58 | 0.40  |
| ILMN_1803279 | TMED5    | 1  | 8.56 | -0.42 |
| ILMN_1784678 | PBX1     | 1  | 8.56 | 0.37  |
| ILMN_1662174 | ORMDL3   | 17 | 8.54 | -0.38 |
| ILMN_1678165 | LSM7     | 19 | 8.53 | -0.41 |
| ILMN_1694223 | DGCR8    | 22 | 8.51 | 0.39  |
| ILMN_1763228 | MEF2D    | 1  | 8.44 | 0.37  |
| ILMN_1691946 | FAM173B  | 5  | 8.37 | 0.40  |
| ILMN_1766916 | RPAP3    | 12 | 8.36 | 0.36  |
| ILMN_1720708 | CSNK1D   | 17 | 8.36 | -0.42 |
| ILMN_1707062 | REV1     | 2  | 8.33 | 0.43  |
| ILMN_2174081 | ZNF133   | 20 | 8.29 | 0.42  |

|              |          |    |      |       |
|--------------|----------|----|------|-------|
| ILMN_1730611 | RTN4     | 2  | 8.27 | -0.36 |
| ILMN_1699723 | RARB     | 3  | 8.26 | 0.37  |
| ILMN_1811823 | MED25    | 19 | 8.19 | 0.39  |
| ILMN_2392189 | CTDSPL   | 3  | 8.18 | 0.39  |
| ILMN_1656560 | PARM1    | 4  | 8.18 | 0.37  |
| ILMN_1731745 | NINJ2    | 12 | 8.16 | -0.39 |
| ILMN_1673073 | WDR62    | 19 | 8.14 | 0.34  |
| ILMN_2049693 | C11orf71 | 11 | 8.12 | 0.33  |
| ILMN_1715647 | VANGL2   | 1  | 8.10 | 0.38  |
| ILMN_1803611 | SNAPC3   | 9  | 8.08 | 0.38  |
| ILMN_1769883 | IDE      | 10 | 8.07 | 0.41  |
| ILMN_1785644 | AP5S1    | 20 | 7.95 | 0.40  |
| ILMN_1666122 | HEG1     | 3  | 7.93 | 0.38  |
| ILMN_1750722 | RPS7     | 2  | 7.92 | -0.36 |
| ILMN_2156982 | IMP4     | 2  | 7.88 | -0.38 |
| ILMN_2324056 | GNL3     | 3  | 7.81 | -0.38 |
| ILMN_1801302 | SCN1B    | 19 | 7.79 | 0.36  |
| ILMN_1724666 | INADL    | 1  | 7.74 | 0.36  |
| ILMN_1804476 | GMPPA    | 2  | 7.72 | -0.38 |
| ILMN_1667239 | INPP1    | 2  | 7.71 | 0.38  |
| ILMN_1734254 | ZNF770   | 15 | 7.67 | 0.40  |
| ILMN_1716973 | POLM     | 7  | 7.65 | 0.38  |
| ILMN_1743402 | SIX4     | 14 | 7.64 | 0.39  |
| ILMN_2235283 | MAPK1    | 22 | 7.61 | -0.40 |
| ILMN_2215545 | C3orf26  | 3  | 7.58 | -0.37 |
| ILMN_2209748 | DERL1    | 8  | 7.58 | -0.37 |
| ILMN_1747775 | STX2     | 12 | 7.53 | -0.36 |
| ILMN_2199313 | NPDC1    | 9  | 7.52 | -0.37 |
| ILMN_2358560 | TIAM2    | 6  | 7.52 | -0.40 |
| ILMN_1795428 | WDR59    | 16 | 7.52 | 0.37  |
| ILMN_1766814 | TK2      | 16 | 7.50 | -0.36 |
| ILMN_1780825 | RRAS     | 19 | 7.48 | -0.34 |
| ILMN_1741881 | C9orf72  | 9  | 7.47 | 0.39  |
| ILMN_1710697 | BUD31    | 7  | 7.47 | -0.36 |
| ILMN_1682165 | NT5C2    | 10 | 7.43 | -0.34 |
| ILMN_1730698 | ODF2     | 9  | 7.42 | -0.37 |
| ILMN_1745623 | EFCAB4A  | 11 | 7.40 | 0.39  |
| ILMN_1775573 | DPY19L4  | 8  | 7.28 | -0.33 |
| ILMN_1706523 | FCGR2A   | 1  | 7.18 | 0.35  |
| ILMN_2128770 | CDR2L    | 17 | 7.17 | -0.34 |
| ILMN_1764096 | CCBL1    | 9  | 7.16 | 0.36  |
| ILMN_1745778 | SLC45A4  | 8  | 7.15 | 0.35  |
| ILMN_1663538 | CLYBL    | 13 | 7.15 | 0.40  |
| ILMN_1784766 | MCM3AP   | 21 | 7.10 | 0.36  |
| ILMN_1807372 | ADORA2A  | 22 | 7.09 | 0.35  |

|              |            |    |      |       |
|--------------|------------|----|------|-------|
| ILMN_1651719 | MBTPS1     | 16 | 7.08 | 0.35  |
| ILMN_1753502 | IGSF11     | 3  | 7.08 | 0.36  |
| ILMN_1713964 | BTBD3      | 20 | 7.05 | 0.34  |
| ILMN_2403664 | POMC       | 2  | 7.03 | 0.39  |
| ILMN_1708934 | ADM        | 11 | 6.97 | -0.30 |
| ILMN_1800590 | BBS1       | 11 | 6.95 | 0.35  |
| ILMN_1682449 | ZNF518B    | 4  | 6.93 | 0.34  |
| ILMN_1664424 | ZBED5      | 11 | 6.87 | 0.34  |
| ILMN_1708009 | LANCL2     | 7  | 6.87 | 0.36  |
| ILMN_1792415 | GTDC2      | 3  | 6.86 | 0.35  |
| ILMN_1707649 | MPDZ       | 9  | 6.83 | 0.37  |
| ILMN_1705144 | ULK1       | 12 | 6.79 | 0.27  |
| ILMN_1731287 | ARFGAP3    | 22 | 6.77 | -0.31 |
| ILMN_2178587 | ANKRD6     | 6  | 6.76 | 0.35  |
| ILMN_1680987 | HAND1      | 5  | 6.76 | 0.37  |
| ILMN_1657495 | MLEC       | 12 | 6.74 | 0.34  |
| ILMN_2129161 | LRRC32     | 11 | 6.73 | -0.34 |
| ILMN_2375484 | CPEB2      | 4  | 6.73 | 0.35  |
| ILMN_1791226 | NXN        | 17 | 6.64 | 0.32  |
| ILMN_1755643 | MGAT4A     | 2  | 6.62 | -0.36 |
| ILMN_2180239 | DOPEY2     | 21 | 6.61 | -0.35 |
| ILMN_1718907 | TSHZ1      | 18 | 6.56 | 0.29  |
| ILMN_1747058 | TRAPPC2L   | 16 | 6.55 | 0.30  |
| ILMN_1767253 | RRP12      | 10 | 6.54 | -0.34 |
| ILMN_1759411 | C16orf79   | 16 | 6.52 | 0.32  |
| ILMN_1878019 | DOK6       | 18 | 6.48 | 0.30  |
| ILMN_1797341 | ARID1A     | 1  | 6.43 | -0.32 |
| ILMN_1753584 | KRT8       | 12 | 6.42 | 0.27  |
| ILMN_1695491 | WDYHV1     | 8  | 6.40 | 0.37  |
| ILMN_1710427 | VPS37B     | 12 | 6.39 | 0.32  |
| ILMN_1655563 | CTIF       | 18 | 6.39 | -0.35 |
| ILMN_1799104 | SPAG9      | 17 | 6.37 | -0.35 |
| ILMN_1814315 | PBXIP1     | 1  | 6.36 | 0.34  |
| ILMN_1687857 | ST6GALNAC4 | 9  | 6.36 | -0.35 |
| ILMN_1717490 | RPL6       | 12 | 6.35 | -0.34 |
| ILMN_1787539 | ZNF177     | 19 | 6.34 | 0.34  |
| ILMN_1755741 | DACH1      | 13 | 6.31 | 0.32  |
| ILMN_2395285 | SNRNP35    | 12 | 6.29 | 0.34  |
| ILMN_1799589 | NOXA1      | 9  | 6.29 | 0.30  |
| ILMN_1697962 | NSMCE1     | 16 | 6.23 | -0.32 |
| ILMN_1692267 | B4GALT3    | 1  | 6.23 | -0.34 |
| ILMN_1803855 | FAIM2      | 12 | 6.22 | 0.30  |
| ILMN_2415189 | ATP1A1     | 1  | 6.20 | -0.33 |
| ILMN_1704305 | NIP7       | 16 | 6.18 | -0.33 |
| ILMN_1754051 | RMI1       | 9  | 6.16 | 0.30  |

|              |          |    |      |       |
|--------------|----------|----|------|-------|
| ILMN_1691567 | GNPDA2   | 4  | 6.16 | 0.35  |
| ILMN_1680874 | TUBB2B   | 6  | 6.14 | 0.32  |
| ILMN_1672022 | EPHA4    | 2  | 6.14 | 0.29  |
| ILMN_2358541 | RBMS1    | 2  | 6.13 | -0.37 |
| ILMN_1728228 | ZNF548   | 19 | 6.05 | 0.28  |
| ILMN_1665964 | GAB2     | 11 | 6.04 | -0.34 |
| ILMN_1688152 | IL27RA   | 19 | 5.96 | -0.31 |
| ILMN_2159859 | LYSMD4   | 15 | 5.96 | 0.27  |
| ILMN_1713993 | UBAC2    | 13 | 5.96 | -0.32 |
| ILMN_1692168 | UBE2Z    | 17 | 5.96 | -0.34 |
| ILMN_1770020 | PPIL3    | 2  | 5.91 | 0.34  |
| ILMN_1726108 | CERS2    | 1  | 5.91 | -0.32 |
| ILMN_1666385 | CALM3    | 19 | 5.90 | -0.13 |
| ILMN_1736077 | LIAS     | 4  | 5.87 | 0.32  |
| ILMN_1751887 | PREP     | 6  | 5.82 | -0.29 |
| ILMN_1710209 | MFSD6    | 2  | 5.81 | 0.25  |
| ILMN_1671686 | EPB49    | 8  | 5.80 | 0.33  |
| ILMN_1678268 | VPS8     | 3  | 5.79 | -0.27 |
| ILMN_1667043 | EIF4A3   | 17 | 5.77 | -0.28 |
| ILMN_2230683 | CDCA7L   | 7  | 5.75 | 0.31  |
| ILMN_1743714 | CARD10   | 22 | 5.71 | 0.29  |
| ILMN_1749866 | GATA4    | 8  | 5.65 | 0.31  |
| ILMN_1688480 | CCND1    | 11 | 5.63 | -0.26 |
| ILMN_1709114 | TAB1     | 22 | 5.62 | 0.34  |
| ILMN_1666482 | SP2      | 17 | 5.60 | 0.29  |
| ILMN_2179717 | FAM189A2 | 9  | 5.59 | 0.27  |
| ILMN_2411963 | RBM39    | 20 | 5.58 | -0.32 |
| ILMN_1674380 | TRPC1    | 3  | 5.56 | 0.25  |
| ILMN_2107933 | ZNF285   | 19 | 5.56 | 0.29  |
| ILMN_2070044 | PPM1K    | 4  | 5.54 | 0.31  |
| ILMN_1749821 | MED28    | 4  | 5.54 | 0.27  |
| ILMN_1737965 | ELOVL4   | 6  | 5.52 | -0.28 |
| ILMN_1782551 | E2F5     | 8  | 5.52 | 0.32  |
| ILMN_1767111 | ANO10    | 3  | 5.50 | -0.32 |
| ILMN_1763144 | NEU1     | 6  | 5.49 | -0.30 |
| ILMN_1765532 | RDBP     | 6  | 5.48 | -0.32 |
| ILMN_1654541 | ATP6V1G2 | 6  | 5.47 | 0.30  |
| ILMN_1813010 | VTA1     | 6  | 5.44 | 0.30  |
| ILMN_1699545 | PCSK7    | 11 | 5.44 | -0.29 |
| ILMN_1691559 | ELF2     | 4  | 5.44 | 0.31  |
| ILMN_1678504 | RHOT1    | 17 | 5.44 | 0.31  |
| ILMN_2123119 | MFSD8    | 4  | 5.43 | -0.30 |
| ILMN_1815032 | SOX7     | 8  | 5.43 | 0.30  |
| ILMN_1789436 | DENND1B  | 1  | 5.41 | 0.30  |
| ILMN_1661337 | SRM      | 1  | 5.41 | -0.33 |

|              |           |    |      |       |
|--------------|-----------|----|------|-------|
| ILMN_1713529 | SEMA6A    | 5  | 5.39 | 0.28  |
| ILMN_1724293 | KDELR2    | 7  | 5.38 | -0.31 |
| ILMN_1734830 | MTHFR     | 1  | 5.37 | 0.27  |
| ILMN_1761531 | SGPL1     | 10 | 5.37 | -0.33 |
| ILMN_1780861 | METRNL    | 17 | 5.37 | -0.29 |
| ILMN_1784238 | SEC22B    | 1  | 5.35 | -0.29 |
| ILMN_1796377 | C14orf37  | 14 | 5.31 | -0.28 |
| ILMN_2186858 | ZNF839    | 14 | 5.29 | 0.31  |
| ILMN_1690252 | ALKBH2    | 12 | 5.28 | 0.31  |
| ILMN_2388539 | C17orf101 | 17 | 5.27 | -0.29 |
| ILMN_1723768 | NLRX1     | 11 | 5.26 | 0.25  |
| ILMN_1711919 | SCYL2     | 12 | 5.25 | -0.30 |
| ILMN_1795338 | YPEL1     | 22 | 5.25 | 0.27  |
| ILMN_1750689 | MPP5      | 14 | 5.22 | 0.31  |
| ILMN_1736533 | RND2      | 17 | 5.19 | 0.29  |
| ILMN_1747556 | CDK9      | 9  | 5.19 | 0.27  |
| ILMN_1727740 | SYNCRIP   | 6  | 5.18 | -0.28 |
| ILMN_1741869 | WDR47     | 1  | 5.14 | 0.29  |
| ILMN_1760121 | RRAGC     | 1  | 5.14 | -0.31 |
| ILMN_1755504 | CALCOCO2  | 17 | 5.14 | 0.30  |
| ILMN_1693401 | KLHL28    | 14 | 5.13 | 0.29  |
| ILMN_1716507 | EPB41L1   | 20 | 5.12 | 0.28  |
| ILMN_1674034 | H2AFY     | 5  | 5.12 | 0.21  |
| ILMN_1742935 | ZNF33B    | 10 | 5.11 | 0.30  |
| ILMN_1700834 | SLK       | 10 | 5.09 | -0.24 |
| ILMN_1689431 | APCDD1L   | 20 | 5.09 | 0.29  |
| ILMN_1718629 | NRIP1     | 21 | 5.09 | 0.28  |
| ILMN_1703246 | SBF1      | 22 | 5.07 | -0.30 |
| ILMN_1785926 | ZNF621    | 3  | 5.06 | -0.30 |
| ILMN_1735495 | TBC1D8    | 2  | 5.00 | -0.27 |
| ILMN_2285802 | SEC14L1   | 17 | 4.99 | -0.29 |
| ILMN_2227757 | PCDHB2    | 5  | 4.99 | -0.30 |
| ILMN_2141482 | SERPINF1  | 17 | 4.99 | -0.27 |
| ILMN_1763461 | ALDH7A1   | 5  | 4.98 | 0.29  |
| ILMN_1722059 | SAFB      | 19 | 4.95 | 0.25  |
| ILMN_1804629 | TPK1      | 7  | 4.94 | -0.26 |
| ILMN_2363591 | SDCBP     | 8  | 4.94 | 0.20  |
| ILMN_1679358 | ZDHHC5    | 11 | 4.93 | -0.25 |
| ILMN_2173835 | FTH1P3    | 2  | 4.93 | -0.28 |
| ILMN_1703314 | KLHL36    | 16 | 4.92 | -0.28 |
| ILMN_1786347 | TNPO1     | 5  | 4.92 | -0.28 |
| ILMN_1703754 | CEP192    | 18 | 4.90 | 0.30  |
| ILMN_1713037 | PFKL      | 21 | 4.90 | -0.27 |
| ILMN_1755588 | KANK3     | 19 | 4.90 | 0.26  |
| ILMN_1777344 | RPS13     | 11 | 4.89 | 0.30  |

|              |           |    |      |       |
|--------------|-----------|----|------|-------|
| ILMN_1814971 | TCF25     | 16 | 4.89 | -0.26 |
| ILMN_1781198 | PPP1R3D   | 20 | 4.85 | 0.29  |
| ILMN_1769575 | JAM3      | 11 | 4.84 | -0.28 |
| ILMN_1671427 | FBXW4     | 10 | 4.84 | 0.26  |
| ILMN_1754655 | TTLL5     | 14 | 4.84 | 0.25  |
| ILMN_2306540 | PDE9A     | 21 | 4.81 | 0.27  |
| ILMN_1752111 | SMARCA1   | 2  | 4.80 | 0.28  |
| ILMN_1773307 | NAP1L5    | 4  | 4.79 | -0.26 |
| ILMN_2210729 | STYXL1    | 7  | 4.75 | 0.30  |
| ILMN_1812968 | SOX18     | 20 | 4.71 | 0.25  |
| ILMN_1778010 | IL32      | 16 | 4.68 | -0.27 |
| ILMN_1734229 | SPPL2A    | 15 | 4.67 | -0.27 |
| ILMN_2221673 | ASNSD1    | 2  | 4.65 | 0.27  |
| ILMN_1658399 | KLRG1     | 12 | 4.64 | 0.24  |
| ILMN_1708101 | LMNB2     | 19 | 4.62 | -0.27 |
| ILMN_1815673 | DKK3      | 11 | 4.62 | -0.23 |
| ILMN_1708328 | RAB11FIP3 | 16 | 4.61 | -0.21 |
| ILMN_1754839 | DHX15     | 4  | 4.60 | -0.29 |
| ILMN_1797566 | SNAP47    | 1  | 4.57 | -0.18 |
| ILMN_1802843 | PRCC      | 1  | 4.56 | 0.27  |
| ILMN_1812841 | C8orf34   | 8  | 4.56 | 0.27  |
| ILMN_1665049 | SPG11     | 15 | 4.55 | 0.29  |
| ILMN_1906187 | CAMK1D    | 10 | 4.54 | 0.19  |
| ILMN_2225709 | PTCD1     | 7  | 4.53 | 0.26  |
| ILMN_1748970 | PRR15L    | 17 | 4.51 | 0.27  |
| ILMN_1715669 | TP53I11   | 11 | 4.50 | 0.19  |
| ILMN_1696065 | SDF4      | 1  | 4.48 | -0.28 |
| ILMN_1792176 | TADA3     | 3  | 4.47 | -0.29 |
| ILMN_2059211 | KIAA0195  | 17 | 4.44 | 0.19  |
| ILMN_1733667 | DHX35     | 20 | 4.42 | 0.24  |
| ILMN_1722753 | GJA5      | 1  | 4.42 | 0.19  |
| ILMN_2398926 | C17orf58  | 17 | 4.39 | 0.18  |
| ILMN_1691112 | PIGN      | 18 | 4.39 | 0.28  |
| ILMN_1815141 | MTR       | 1  | 4.33 | 0.23  |
| ILMN_2305721 | POMT1     | 9  | 4.33 | 0.27  |
| ILMN_1682332 | GYPC      | 2  | 4.30 | -0.27 |
| ILMN_1652753 | PAAF1     | 11 | 4.30 | 0.21  |
| ILMN_1731546 | RPL26     | 17 | 4.29 | 0.28  |
| ILMN_2410909 | AKT1      | 14 | 4.27 | -0.27 |
| ILMN_1781231 | SLC25A38  | 3  | 4.27 | 0.25  |
| ILMN_1656136 | STAU1     | 20 | 4.24 | -0.27 |
| ILMN_1704753 | EPAS1     | 2  | 4.23 | 0.21  |
| ILMN_2111187 | ELOVL6    | 4  | 4.22 | -0.26 |
| ILMN_1700461 | AARSD1    | 17 | 4.21 | 0.24  |
| ILMN_2072973 | TOP3A     | 17 | 4.20 | -0.22 |

|              |            |    |      |       |
|--------------|------------|----|------|-------|
| ILMN_1801833 | ARHGAP24   | 4  | 4.20 | -0.12 |
| ILMN_1768101 | HOXB6      | 17 | 4.17 | -0.17 |
| ILMN_1669032 | PPIC       | 5  | 4.15 | -0.27 |
| ILMN_1805807 | SLC30A3    | 2  | 4.14 | 0.18  |
| ILMN_2075051 | PGS1       | 17 | 4.13 | -0.23 |
| ILMN_1655557 | INTS6      | 13 | 4.12 | -0.24 |
| ILMN_2237746 | ING3       | 7  | 4.11 | -0.23 |
| ILMN_2093389 | SNAPC1     | 14 | 4.07 | 0.26  |
| ILMN_1791511 | TMEM176A   | 7  | 4.07 | 0.25  |
| ILMN_1766542 | RNPC3      | 1  | 4.06 | 0.22  |
| ILMN_1653466 | HES4       | 1  | 4.02 | -0.19 |
| ILMN_1659054 | CHKB       | 22 | 4.01 | 0.24  |
| ILMN_1664641 | MED4       | 13 | 4.01 | 0.27  |
| ILMN_1685679 | RNF146     | 6  | 4.00 | -0.20 |
| ILMN_1772224 | KCNJ5      | 11 | 4.00 | 0.22  |
| ILMN_1766264 | PI16       | 6  | 3.99 | -0.25 |
| ILMN_1662667 | ANKRD20A8P | 2  | 3.98 | 0.25  |
| ILMN_1786189 | MKI67IP    | 2  | 3.95 | -0.20 |
| ILMN_1782829 | GLTSCR1    | 19 | 3.91 | 0.26  |
| ILMN_2077886 | C1orf109   | 1  | 3.89 | 0.23  |
| ILMN_1755235 | XPO6       | 16 | 3.88 | -0.18 |
| ILMN_1710906 | RNF145     | 5  | 3.81 | -0.24 |
| ILMN_1777411 | ATP1A2     | 1  | 3.80 | -0.19 |
| ILMN_1678290 | HMG20A     | 15 | 3.76 | 0.24  |
| ILMN_2160929 | FEN1       | 11 | 3.74 | 0.23  |
| ILMN_1658176 | ABCG1      | 21 | 3.70 | 0.15  |
| ILMN_1655225 | C19orf25   | 19 | 3.70 | 0.22  |
| ILMN_1775498 | FAM100B    | 17 | 3.69 | -0.18 |
| ILMN_1758337 | ZNF213     | 16 | 3.68 | -0.21 |
| ILMN_1779486 | FAM126B    | 2  | 3.66 | 0.25  |
| ILMN_1665066 | NOA1       | 4  | 3.63 | 0.22  |
| ILMN_1797367 | TSC1       | 9  | 3.61 | 0.20  |
| ILMN_1663379 | FBXL15     | 10 | 3.60 | 0.23  |
| ILMN_1768181 | TOR3A      | 1  | 3.59 | -0.21 |
| ILMN_2365881 | ATG16L1    | 2  | 3.56 | 0.22  |
| ILMN_2167616 | NACA       | 12 | 3.54 | -0.21 |
| ILMN_1772113 | U2AF1      | 21 | 3.53 | -0.24 |
| ILMN_2405018 | PPP1CB     | 2  | 3.52 | -0.24 |
| ILMN_2175465 | RSL24D1    | 15 | 3.50 | 0.24  |
| ILMN_1771026 | GARS       | 7  | 3.50 | -0.24 |
| ILMN_1750511 | NT5C3L     | 17 | 3.48 | -0.23 |
| ILMN_2406892 | URI1       | 19 | 3.46 | -0.23 |
| ILMN_1803652 | C9orf91    | 9  | 3.45 | -0.21 |
| ILMN_1658884 | ATP11B     | 3  | 3.45 | 0.24  |
| ILMN_1692219 | RAB11FIP1  | 8  | 3.44 | 0.15  |

|              |          |    |      |       |
|--------------|----------|----|------|-------|
| ILMN_1778226 | EXTL3    | 8  | 3.40 | 0.17  |
| ILMN_1732537 | HEATR2   | 7  | 3.40 | 0.17  |
| ILMN_2222065 | FZD1     | 7  | 3.40 | 0.17  |
| ILMN_1766346 | ZNF512B  | 20 | 3.39 | 0.18  |
| ILMN_2386016 | C2orf28  | 2  | 3.39 | 0.20  |
| ILMN_1762436 | UBB      | 17 | 3.37 | 0.22  |
| ILMN_2088172 | POLR2B   | 4  | 3.34 | 0.23  |
| ILMN_1691476 | MYLK     | 3  | 3.33 | 0.16  |
| ILMN_1699665 | CLIC6    | 21 | 3.33 | 0.16  |
| ILMN_1690099 | ITGB1BP1 | 2  | 3.32 | -0.20 |
| ILMN_1693630 | C16orf7  | 16 | 3.32 | 0.20  |
| ILMN_1694589 | PAQR8    | 6  | 3.31 | -0.23 |
| ILMN_1731157 | MYOZ1    | 10 | 3.30 | -0.22 |
| ILMN_1768773 | EGLN2    | 19 | 3.30 | 0.22  |
| ILMN_2245305 | ABHD12   | 20 | 3.29 | -0.23 |
| ILMN_2072091 | HNRNPUL2 | 11 | 3.27 | 0.23  |
| ILMN_1685140 | PRRC1    | 5  | 3.26 | -0.21 |
| ILMN_1791067 | TESK1    | 9  | 3.26 | -0.23 |
| ILMN_2360705 | ACSL3    | 2  | 3.26 | -0.23 |
| ILMN_1761113 | GNL2     | 1  | 3.25 | -0.17 |
| ILMN_1749218 | TOPORS   | 9  | 3.25 | 0.18  |
| ILMN_1739558 | CRELD1   | 3  | 3.25 | 0.09  |
| ILMN_1677200 | CYFIP2   | 5  | 3.25 | 0.22  |
| ILMN_2069593 | SCAF11   | 12 | 3.24 | -0.23 |
| ILMN_1815719 | PLCG2    | 16 | 3.23 | 0.25  |
| ILMN_1729430 | FBXO18   | 10 | 3.23 | 0.22  |
| ILMN_1807304 | MBNL1    | 3  | 3.21 | -0.20 |
| ILMN_2157240 | MNS1     | 15 | 3.21 | -0.21 |
| ILMN_2217935 | RFC1     | 4  | 3.20 | 0.22  |
| ILMN_1705213 | TMBIM1   | 2  | 3.14 | -0.19 |
| ILMN_2148507 | ANKRD13C | 1  | 3.12 | -0.21 |
| ILMN_1737157 | GRAMD1A  | 19 | 3.05 | -0.14 |
| ILMN_1696330 | GUF1     | 4  | 3.03 | -0.20 |
| ILMN_2309228 | GPS1     | 17 | 3.03 | 0.21  |
| ILMN_2290998 | CCS      | 11 | 3.00 | 0.19  |
| ILMN_1763640 | NCKAP5L  | 12 | 2.98 | 0.14  |
| ILMN_1708841 | GOLPH3   | 5  | 2.98 | -0.18 |
| ILMN_1661424 | THAP6    | 4  | 2.92 | 0.18  |
| ILMN_1673185 | CPSF2    | 14 | 2.90 | 0.21  |
| ILMN_1668027 | NDUFB4   | 3  | 2.88 | 0.19  |
| ILMN_1801383 | SMG1     | 16 | 2.88 | -0.21 |
| ILMN_1776515 | MPPE1    | 18 | 2.78 | -0.15 |
| ILMN_1794643 | ZGPAT    | 20 | 2.75 | -0.11 |
| ILMN_2087989 | ZFAND1   | 8  | 2.74 | -0.13 |
| ILMN_2136177 | CNOT6    | 5  | 2.52 | -0.15 |

|              |         |    |      |       |
|--------------|---------|----|------|-------|
| ILMN_1783843 | MIIP    | 1  | 2.52 | -0.14 |
| ILMN_1700044 | SAP130  | 2  | 2.51 | 0.14  |
| ILMN_1744665 | EP300   | 22 | 2.25 | -0.14 |
| ILMN_1685824 | B4GALT5 | 20 | 2.18 | 0.15  |
| ILMN_1745130 | RBFOX2  | 22 | 2.17 | -0.12 |
| ILMN_2341815 | TFG     | 3  | 2.14 | -0.11 |
| ILMN_1695959 | FAM176C | 21 | 1.81 | -0.12 |

\*ILMN\_ID – Probe Illumina ID

†HGNC – HGNC symbol

‡Chr. No. – Chromosome number

§kWithin – Intramodular connectivity

||MM – Module membership

**Table S7: Ingenuity IPA<sup>®</sup> analysis of salmon module gene contents.**

| Category                                       | Functions                                        | Functions Annotation                             | p-Value  | Molecules                             | # Molecules |
|------------------------------------------------|--------------------------------------------------|--------------------------------------------------|----------|---------------------------------------|-------------|
| Cellular Compromise                            | oxidative stress response                        | oxidative stress response of myocardium          | 4.44E-04 | AGT, TXN                              | 2           |
| Organ Morphology                               | oxidative stress response                        | oxidative stress response of myocardium          | 4.44E-04 | AGT, TXN                              | 2           |
| Tissue Morphology                              | oxidative stress response                        | oxidative stress response of myocardium          | 4.44E-04 | AGT, TXN                              | 2           |
| Endocrine System Disorders                     | primary pigmented nodular adrenocortical disease | primary pigmented nodular adrenocortical disease | 4.44E-04 | PDE8B, PRKAR1A                        | 2           |
| Organismal Injury and Abnormalities            | restenosis                                       | restenosis of femoral artery                     | 4.44E-04 | AGT, RCAN1                            | 2           |
| Cardiovascular System Development and Function | stroke volume index                              | stroke volume index                              | 4.44E-04 | ANGPT2, ENG                           | 2           |
| Cardiovascular System Development and Function | vasoconstriction                                 | vasoconstriction of mesenteric artery            | 4.44E-04 | AGT, ANGPT2                           | 2           |
| Post-Translational Modification                | folding                                          | folding of protein                               | 7.56E-04 | DNAJA1, DNAJA4, HSPA5, HSPB1, TXN     | 5           |
| Protein Folding                                | folding                                          | folding of protein                               | 7.56E-04 | DNAJA1, DNAJA4, HSPA5, HSPB1, TXN     | 5           |
| Endocrine System Disorders                     | differentiated thyroid cancer                    | differentiated thyroid cancer                    | 1.25E-03 | ANGPT2, ENG, LGA, LS3, PRKAR1A, PTPN4 | 5           |
| Cancer                                         | differentiated thyroid cancer                    | differentiated thyroid cancer                    | 1.25E-03 | ANGPT2, ENG, LGA, LS3, PRKAR1A, PTPN4 | 5           |
| Cell Death and Survival                        | apoptosis                                        | apoptosis of lymphoid cells                      | 1.31E-03 | HSPA5, TXN                            | 2           |
| Tissue Morphology                              | dilation                                         | dilation of epithelial tissue                    | 1.31E-03 | AGT, LGALS3                           | 2           |
| Free Radical Scavenging                        | metabolism                                       | metabolism of hydrogen peroxide                  | 1.76E-03 | AGT, ANGPT2, GPX4, LCLAT1, TXN        | 5           |
| Small Molecule Biochemistry                    | metabolism                                       | metabolism of hydrogen peroxide                  | 1.76E-03 | AGT, ANGPT2, GPX4, LCLAT1, TXN        | 5           |
| Organ Morphology                               | abnormal morphology                              | abnormal morphology of sebaceous glands          | 2.59E-03 | CBS, NCOA6                            | 2           |
| Developmental                                  | developmental                                    | developmental                                    | 2.59E-03 | NCOA6, PEX5                           | 2           |

|                                           |                          |                                        |          |                                 |   |
|-------------------------------------------|--------------------------|----------------------------------------|----------|---------------------------------|---|
| Disorder                                  | delay                    | delay of brain                         |          |                                 |   |
| Neurological Disease                      | developmental delay      | developmental delay of brain           | 2.59E-03 | NCOA6,PEX5                      | 2 |
| Organismal Injury and Abnormalities       | formation                | formation of abdominal aortic aneurysm | 2.59E-03 | AGT,ANGPT2                      | 2 |
| Cardiovascular Disease                    | formation                | formation of abdominal aortic aneurysm | 2.59E-03 | AGT,ANGPT2                      | 2 |
| Cellular Development                      | proliferation            | proliferation of adrenal gland cells   | 2.59E-03 | AGT,ANGPT2                      | 2 |
| Cellular Growth and Proliferation         | proliferation            | proliferation of adrenal gland cells   | 2.59E-03 | AGT,ANGPT2                      | 2 |
| Endocrine System Development and Function | proliferation            | proliferation of adrenal gland cells   | 2.59E-03 | AGT,ANGPT2                      | 2 |
| Small Molecule Biochemistry               | uptake                   | uptake of dopamine                     | 2.59E-03 | AGT,SCAMP2                      | 2 |
| Cell-To-Cell Signaling and Interaction    | uptake                   | uptake of dopamine                     | 2.59E-03 | AGT,SCAMP2                      | 2 |
| Drug Metabolism                           | uptake                   | uptake of dopamine                     | 2.59E-03 | AGT,SCAMP2                      | 2 |
| Molecular Transport                       | uptake                   | uptake of dopamine                     | 2.59E-03 | AGT,SCAMP2                      | 2 |
| Cardiovascular Disease                    | hypertrophy              | hypertrophy of left ventricle          | 2.63E-03 | AGT,ANGPT2,MYH7,RCAN1           | 4 |
| Developmental Disorder                    | hypertrophy              | hypertrophy of left ventricle          | 2.63E-03 | AGT,ANGPT2,MYH7,RCAN1           | 4 |
| Organismal Injury and Abnormalities       | degeneration             | Organ Degeneration                     | 2.73E-03 | AGT,ATXN1,CAPN1,NR1H3,PPT2,TXN  | 6 |
| Endocrine System Disorders                | thyroid carcinoma        | thyroid carcinoma                      | 3.21E-03 | ANGPT2,ENG,LGALS3,PRKAR1A,PTPN4 | 5 |
| Cancer                                    | thyroid carcinoma        | thyroid carcinoma                      | 3.21E-03 | ANGPT2,ENG,LGALS3,PRKAR1A,PTPN4 | 5 |
| Endocrine System Disorders                | papillary thyroid cancer | papillary thyroid cancer               | 3.40E-03 | ENG,LGALS3,PRKAR1A,PTPN4        | 4 |
| Cancer                                    | papillary thyroid cancer | papillary thyroid cancer               | 3.40E-03 | ENG,LGALS3,PRKAR1A,PTPN4        | 4 |
| Cell Signaling                            | signaling                | signaling of Ca <sup>2+</sup>          | 4.23E-03 | CDH13,HSPA5,INPP5A              | 3 |
| Vitamin and Mineral Metabolism            | signaling                | signaling of Ca <sup>2+</sup>          | 4.23E-03 | CDH13,HSPA5,INPP5A              | 3 |
| Cellular Growth and Proliferation         | cytostasis               | cytostasis of leukemia cell lines      | 4.26E-03 | CBS,PRKAR1A                     | 2 |
| Developmental                             | developmental            | developmental                          | 4.26E-03 | CBS,PEX5                        | 2 |

|                                                |                       |                                              |          |                        |   |
|------------------------------------------------|-----------------------|----------------------------------------------|----------|------------------------|---|
| Disorder                                       | delay                 | delay of kidney                              |          |                        |   |
| Renal and Urological Disease                   | developmental delay   | developmental delay of kidney                | 4.26E-03 | CBS,PEX5               | 2 |
| Organismal Injury and Abnormalities            | neurodegeneration     | neurodegeneration of cerebellum              | 4.26E-03 | ATXN1,PPT2             | 2 |
| Neurological Disease                           | neurodegeneration     | neurodegeneration of cerebellum              | 4.26E-03 | ATXN1,PPT2             | 2 |
| Cardiovascular System Development and Function | relaxation            | relaxation of aortic ring tissue             | 4.26E-03 | AGT,FHL2               | 2 |
| Tissue Morphology                              | relaxation            | relaxation of aortic ring tissue             | 4.26E-03 | AGT,FHL2               | 2 |
| Cell-To-Cell Signaling and Interaction         | synaptic transmission | synaptic transmission of hippocampal neurons | 4.26E-03 | ATXN1,GRIK2            | 2 |
| Nervous System Development and Function        | synaptic transmission | synaptic transmission of hippocampal neurons | 4.26E-03 | ATXN1,GRIK2            | 2 |
| Small Molecule Biochemistry                    | synthesis             | synthesis of corticosterone                  | 4.26E-03 | AGT,PDE8B              | 2 |
| Endocrine System Development and Function      | synthesis             | synthesis of corticosterone                  | 4.26E-03 | AGT,PDE8B              | 2 |
| Vitamin and Mineral Metabolism                 | synthesis             | synthesis of corticosterone                  | 4.26E-03 | AGT,PDE8B              | 2 |
| Lipid Metabolism                               | synthesis             | synthesis of corticosterone                  | 4.26E-03 | AGT,PDE8B              | 2 |
| Small Molecule Biochemistry                    | synthesis             | synthesis of pregnenolone                    | 4.26E-03 | AGT,DBI                | 2 |
| Endocrine System Development and Function      | synthesis             | synthesis of pregnenolone                    | 4.26E-03 | AGT,DBI                | 2 |
| Vitamin and Mineral Metabolism                 | synthesis             | synthesis of pregnenolone                    | 4.26E-03 | AGT,DBI                | 2 |
| Lipid Metabolism                               | synthesis             | synthesis of pregnenolone                    | 4.26E-03 | AGT,DBI                | 2 |
| Small Molecule Biochemistry                    | secretion             | secretion of steroid                         | 4.32E-03 | AGT,ANGPT2,NCOA6,NR1H3 | 4 |
| Molecular Transport                            | secretion             | secretion of steroid                         | 4.32E-03 | AGT,ANGPT2,NCOA6,NR1H3 | 4 |
| Lipid Metabolism                               | secretion             | secretion of steroid                         | 4.32E-03 | AGT,ANGPT2,NCOA6,NR1H3 | 4 |
| Organ Morphology                               | abnormal morphology   | abnormal morphology of enlarged liver        | 5.97E-03 | CBS,NR1H3,PPT2         | 3 |
| Digestive                                      | abnormal              | abnormal                                     | 5.97E-03 | CBS,NR1H3,PPT2         | 3 |

|                                                       |                     |                                       |          |                          |   |
|-------------------------------------------------------|---------------------|---------------------------------------|----------|--------------------------|---|
| System Development and Function                       | morphology          | morphology of enlarged liver          |          |                          |   |
| Hepatic System Development and Function               | abnormal morphology | abnormal morphology of enlarged liver | 5.97E-03 | CBS,NR1H3,PPT2           | 3 |
| Tissue Morphology                                     | quantity            | quantity of smooth muscle cells       | 5.97E-03 | AGT,ANGPT2,ENG           | 3 |
| Cellular Assembly and Organization                    | quantity            | quantity of smooth muscle cells       | 5.97E-03 | AGT,ANGPT2,ENG           | 3 |
| Cellular Function and Maintenance                     | quantity            | quantity of smooth muscle cells       | 5.97E-03 | AGT,ANGPT2,ENG           | 3 |
| Skeletal and Muscular System Development and Function | quantity            | quantity of smooth muscle cells       | 5.97E-03 | AGT,ANGPT2,ENG           | 3 |
| Small Molecule Biochemistry                           | accumulation        | accumulation of cyclic AMP            | 6.00E-03 | ADCY6,AGT,ANGPT2,PRKAR1A | 4 |
| Molecular Transport                                   | accumulation        | accumulation of cyclic AMP            | 6.00E-03 | ADCY6,AGT,ANGPT2,PRKAR1A | 4 |
| Cell Signaling                                        | accumulation        | accumulation of cyclic AMP            | 6.00E-03 | ADCY6,AGT,ANGPT2,PRKAR1A | 4 |
| Nucleic Acid Metabolism                               | accumulation        | accumulation of cyclic AMP            | 6.00E-03 | ADCY6,AGT,ANGPT2,PRKAR1A | 4 |
| Small Molecule Biochemistry                           | accumulation        | accumulation of cyclic GMP            | 6.30E-03 | AGT,CBS                  | 2 |
| Molecular Transport                                   | accumulation        | accumulation of cyclic GMP            | 6.30E-03 | AGT,CBS                  | 2 |
| Nucleic Acid Metabolism                               | accumulation        | accumulation of cyclic GMP            | 6.30E-03 | AGT,CBS                  | 2 |
| Cardiovascular System Development and Function        | contraction         | contraction of aortic ring tissue     | 6.30E-03 | AGT,ANGPT2               | 2 |
| Tissue Morphology                                     | contraction         | contraction of aortic ring tissue     | 6.30E-03 | AGT,ANGPT2               | 2 |
| Cardiovascular System Development and Function        | diastolic function  | diastolic function                    | 6.30E-03 | AGT,MYH7                 | 2 |
| Molecular Transport                                   | excretion           | excretion of K <sup>+</sup>           | 6.30E-03 | ADCY6,AGT                | 2 |
| Cardiovascular System Development and Function        | sprouting           | sprouting of capillary vessel         | 6.30E-03 | AGT,ANGPT2               | 2 |
| Cellular Development                                  | sprouting           | sprouting of capillary vessel         | 6.30E-03 | AGT,ANGPT2               | 2 |
| Cell Morphology                                       | sprouting           | sprouting of capillary vessel         | 6.30E-03 | AGT,ANGPT2               | 2 |
| Organismal                                            | sprouting           | sprouting of                          | 6.30E-03 | AGT,ANGPT2               | 2 |

|                                               |                          |                                                                |          |                                           |   |
|-----------------------------------------------|--------------------------|----------------------------------------------------------------|----------|-------------------------------------------|---|
| Development                                   |                          | capillary vessel                                               |          |                                           |   |
| Cardiovascular Disease                        | hypertension             | Hypertension                                                   | 6.81E-03 | AGT,ANGPT2,BMP R1A,CDH13,CSNK2 A2,ENG,VWF | 7 |
| Neurological Disease                          | chronic fatigue syndrome | chronic fatigue syndrome                                       | 6.98E-03 | CHGB,EIF4G1,POL R2G                       | 3 |
| Small Molecule Biochemistry                   | synthesis                | synthesis of steroid hormone                                   | 6.98E-03 | AGT,DBI,PDE8B                             | 3 |
| Vitamin and Mineral Metabolism                | synthesis                | synthesis of steroid hormone                                   | 6.98E-03 | AGT,DBI,PDE8B                             | 3 |
| Lipid Metabolism                              | synthesis                | synthesis of steroid hormone                                   | 6.98E-03 | AGT,DBI,PDE8B                             | 3 |
| Cardiovascular Disease                        | hypertrophy              | hypertrophy of cardiomyocytes                                  | 8.38E-03 | ADCY6,AGT,ANGP T2,FHL2,RRAD               | 5 |
| Developmental Disorder                        | hypertrophy              | hypertrophy of cardiomyocytes                                  | 8.38E-03 | ADCY6,AGT,ANGP T2,FHL2,RRAD               | 5 |
| Skeletal and Muscular Disorders               | hypertrophy              | hypertrophy of cardiomyocytes                                  | 8.38E-03 | ADCY6,AGT,ANGP T2,FHL2,RRAD               | 5 |
| Cell Cycle                                    | G1 phase                 | G1 phase of cervical cancer cell lines                         | 8.70E-03 | DTD1,STK38                                | 2 |
| Cell Cycle                                    | cell cycle progression   | arrest in cell cycle progression of prostate cancer cell lines | 8.70E-03 | LGALS3,RRAD                               | 2 |
| Organismal Injury and Abnormalities           | bleeding                 | bleeding of blood vessel                                       | 8.70E-03 | AGT,ENG                                   | 2 |
| Cardiovascular Disease                        | bleeding                 | bleeding of blood vessel                                       | 8.70E-03 | AGT,ENG                                   | 2 |
| Molecular Transport                           | excretion                | excretion of protein                                           | 8.70E-03 | AGT,ANGPT2                                | 2 |
| Protein Trafficking                           | excretion                | excretion of protein                                           | 8.70E-03 | AGT,ANGPT2                                | 2 |
| Organismal Injury and Abnormalities           | fibrosis                 | fibrosis of left ventricle                                     | 8.70E-03 | AGT,ANGPT2                                | 2 |
| Cardiovascular Disease                        | fibrosis                 | fibrosis of left ventricle                                     | 8.70E-03 | AGT,ANGPT2                                | 2 |
| Organ Development                             | function                 | function of uterus                                             | 8.70E-03 | CBS,NR1H3                                 | 2 |
| Reproductive System Development and Function  | function                 | function of uterus                                             | 8.70E-03 | CBS,NR1H3                                 | 2 |
| Cellular Movement                             | infiltration             | infiltration by monocytes                                      | 8.70E-03 | AGT,ANGPT2                                | 2 |
| Hematological System Development and Function | infiltration             | infiltration by monocytes                                      | 8.70E-03 | AGT,ANGPT2                                | 2 |
| Immune Cell                                   | infiltration             | infiltration by                                                | 8.70E-03 | AGT,ANGPT2                                | 2 |

|                                           |                     |                                        |          |                                                                           |    |
|-------------------------------------------|---------------------|----------------------------------------|----------|---------------------------------------------------------------------------|----|
| Trafficking                               |                     | monocytes                              |          |                                                                           |    |
| Inflammatory Response                     | infiltration        | infiltration by monocytes              | 8.70E-03 | AGT,ANGPT2                                                                | 2  |
| Tissue Development                        | mineralization      | mineralization of extracellular matrix | 8.70E-03 | FHL2,VWF                                                                  | 2  |
| Small Molecule Biochemistry               | secretion           | secretion of corticosterone            | 8.70E-03 | AGT,NR1H3                                                                 | 2  |
| Endocrine System Development and Function | secretion           | secretion of corticosterone            | 8.70E-03 | AGT,NR1H3                                                                 | 2  |
| Molecular Transport                       | secretion           | secretion of corticosterone            | 8.70E-03 | AGT,NR1H3                                                                 | 2  |
| Lipid Metabolism                          | secretion           | secretion of corticosterone            | 8.70E-03 | AGT,NR1H3                                                                 | 2  |
| Cell Morphology                           | shape change        | shape change of epithelial cells       | 8.70E-03 | LGALS3,PRKCH                                                              | 2  |
| Cellular Compromise                       | vacuolation         | vacuolation of cells                   | 8.70E-03 | AGT,ATXN1                                                                 | 2  |
| Cell Morphology                           | vacuolation         | vacuolation of cells                   | 8.70E-03 | AGT,ATXN1                                                                 | 2  |
| Cardiovascular Disease                    | vascular disease    | vascular disease                       | 8.78E-03 | AGT,ANGPT2,BMP R1A,CAPN1,CBS,CDH13,ENG,GRIK2,LGALS3,NR1H3,PRKCH,RCAN1,VWF | 13 |
| Developmental Disorder                    | developmental delay | developmental delay                    | 9.30E-03 | CBS,NCOA6,PEX5                                                            | 3  |
| Small Molecule Biochemistry               | metabolism          | metabolism of progesterone             | 9.30E-03 | AGT,DBI,DHRS9                                                             | 3  |
| Drug Metabolism                           | metabolism          | metabolism of progesterone             | 9.30E-03 | AGT,DBI,DHRS9                                                             | 3  |
| Endocrine System Development and Function | metabolism          | metabolism of progesterone             | 9.30E-03 | AGT,DBI,DHRS9                                                             | 3  |
| Vitamin and Mineral Metabolism            | metabolism          | metabolism of progesterone             | 9.30E-03 | AGT,DBI,DHRS9                                                             | 3  |
| Lipid Metabolism                          | metabolism          | metabolism of progesterone             | 9.30E-03 | AGT,DBI,DHRS9                                                             | 3  |
| Cell Death and Survival                   | cell death          | cell death of eye cells                | 1.06E-02 | GPX4,HSPB1,NCOA6                                                          | 3  |
| Small Molecule Biochemistry               | synthesis           | synthesis of terpenoid                 | 1.09E-02 | AGT,ANGPT2,DBI,DHRS9,NR1H3,PD E8B                                         | 6  |
| Vitamin and Mineral Metabolism            | synthesis           | synthesis of terpenoid                 | 1.09E-02 | AGT,ANGPT2,DBI,DHRS9,NR1H3,PD E8B                                         | 6  |
| Lipid Metabolism                          | synthesis           | synthesis of terpenoid                 | 1.09E-02 | AGT,ANGPT2,DBI,DHRS9,NR1H3,PD E8B                                         | 6  |
| Cellular Development                      | differentiation     | differentiation of vascular smooth     | 1.14E-02 | ADCY6,ENG                                                                 | 2  |

|                                                       |                   |                                                 |          |                                       |   |
|-------------------------------------------------------|-------------------|-------------------------------------------------|----------|---------------------------------------|---|
|                                                       |                   | muscle cells                                    |          |                                       |   |
| Skeletal and Muscular System Development and Function | differentiation   | differentiation of vascular smooth muscle cells | 1.14E-02 | ADCY6,ENG                             | 2 |
| Organismal Injury and Abnormalities                   | edema             | edema of brain                                  | 1.14E-02 | ENG,SERPINI1                          | 2 |
| Neurological Disease                                  | edema             | edema of brain                                  | 1.14E-02 | ENG,SERPINI1                          | 2 |
| Cardiovascular System Development and Function        | ejection fraction | ejection fraction of heart                      | 1.14E-02 | ANGPT2,ENG                            | 2 |
| Developmental Disorder                                | hypertrophy       | hypertrophy of smooth muscle cells              | 1.14E-02 | AGT,ANGPT2                            | 2 |
| Skeletal and Muscular Disorders                       | hypertrophy       | hypertrophy of smooth muscle cells              | 1.14E-02 | AGT,ANGPT2                            | 2 |
| Organismal Injury and Abnormalities                   | injury            | injury of muscle                                | 1.14E-02 | AGT,TXN                               | 2 |
| Skeletal and Muscular Disorders                       | injury            | injury of muscle                                | 1.14E-02 | AGT,TXN                               | 2 |
| Tissue Morphology                                     | quantity          | quantity of hepatocytes                         | 1.14E-02 | CBS,NCOA6                             | 2 |
| Hepatic System Development and Function               | quantity          | quantity of hepatocytes                         | 1.14E-02 | CBS,NCOA6                             | 2 |
| Tissue Morphology                                     | quantity          | quantity of neural precursor cells              | 1.14E-02 | BMPR1A,NES                            | 2 |
| Nervous System Development and Function               | quantity          | quantity of neural precursor cells              | 1.14E-02 | BMPR1A,NES                            | 2 |
| Organismal Injury and Abnormalities                   | neurodegeneration | neurodegeneration of brain                      | 1.20E-02 | ATXN1,CAPN1,PPT2                      | 3 |
| Neurological Disease                                  | neurodegeneration | neurodegeneration of brain                      | 1.20E-02 | ATXN1,CAPN1,PPT2                      | 3 |
| Skeletal and Muscular System Development and Function | migration         | migration of vascular smooth muscle cells       | 1.24E-02 | AGT,ANGPT2,RCAN1,TXN                  | 4 |
| Cellular Movement                                     | migration         | migration of vascular smooth muscle cells       | 1.24E-02 | AGT,ANGPT2,RCAN1,TXN                  | 4 |
| Cell-To-Cell Signaling and Interaction                | recruitment       | recruitment of cells                            | 1.25E-02 | AGT,ANGPT2,ENG, LGALS3,RIPK2,TXN, VWF | 7 |

|                                                       |                      |                                          |          |                                                                                         |    |
|-------------------------------------------------------|----------------------|------------------------------------------|----------|-----------------------------------------------------------------------------------------|----|
| Cellular Movement                                     | recruitment          | recruitment of cells                     | 1.25E-02 | AGT,ANGPT2,ENG, LGALS3,RIPK2,TXN ,VWF                                                   | 7  |
| Cardiovascular System Development and Function        | cell viability       | cell viability of endothelial cells      | 1.35E-02 | ANGPT2,CDH13,HS PA5                                                                     | 3  |
| Cell Death and Survival                               | cell viability       | cell viability of endothelial cells      | 1.35E-02 | ANGPT2,CDH13,HS PA5                                                                     | 3  |
| Neurological Disease                                  | Huntington's disease | Huntington's Disease                     | 1.40E-02 | CHGB,DNAJA1,GRI K2,HSPA5,LAPTM4 B,MYH7,RCAN1,RE RE,RHOBTB3,RIPK 2,SERPINI1,TXN,Z NF385B | 13 |
| Skeletal and Muscular Disorders                       | Huntington's disease | Huntington's Disease                     | 1.40E-02 | CHGB,DNAJA1,GRI K2,HSPA5,LAPTM4 B,MYH7,RCAN1,RE RE,RHOBTB3,RIPK 2,SERPINI1,TXN,Z NF385B | 13 |
| Hereditary Disorder                                   | Huntington's disease | Huntington's Disease                     | 1.40E-02 | CHGB,DNAJA1,GRI K2,HSPA5,LAPTM4 B,MYH7,RCAN1,RE RE,RHOBTB3,RIPK 2,SERPINI1,TXN,Z NF385B | 13 |
| Cell Morphology                                       | abnormal morphology  | abnormal morphology of cytotoxic T cells | 1.45E-02 | LGALS3,RCAN1                                                                            | 2  |
| Hematological System Development and Function         | abnormal morphology  | abnormal morphology of cytotoxic T cells | 1.45E-02 | LGALS3,RCAN1                                                                            | 2  |
| Cardiovascular Disease                                | aortic aneurysm      | aortic aneurysm                          | 1.45E-02 | AGT,RCAN1                                                                               | 2  |
| Skeletal and Muscular System Development and Function | area                 | area of muscle cells                     | 1.45E-02 | AGT,ANGPT2                                                                              | 2  |
| Cell Morphology                                       | area                 | area of muscle cells                     | 1.45E-02 | AGT,ANGPT2                                                                              | 2  |
| Organismal Development                                | development          | development of paraxial mesoderm         | 1.45E-02 | BMPR1A,PRKAR1A                                                                          | 2  |
| Tissue Development                                    | development          | development of paraxial mesoderm         | 1.45E-02 | BMPR1A,PRKAR1A                                                                          | 2  |
| Embryonic Development                                 | development          | development of paraxial mesoderm         | 1.45E-02 | BMPR1A,PRKAR1A                                                                          | 2  |
| Cardiovascular System Development                     | diameter             | diameter of blood vessel                 | 1.45E-02 | AGT,ANGPT2                                                                              | 2  |

|                                                       |                     |                                        |          |                             |   |
|-------------------------------------------------------|---------------------|----------------------------------------|----------|-----------------------------|---|
| and Function                                          |                     |                                        |          |                             |   |
| Tissue Morphology                                     | diameter            | diameter of blood vessel               | 1.45E-02 | AGT,ANGPT2                  | 2 |
| Cellular Compromise                                   | formation           | formation of nuclear inclusions        | 1.45E-02 | ATXN1,DNAJA1                | 2 |
| Cellular Assembly and Organization                    | formation           | formation of nuclear inclusions        | 1.45E-02 | ATXN1,DNAJA1                | 2 |
| DNA Replication, Recombination, and Repair            | formation           | formation of nuclear inclusions        | 1.45E-02 | ATXN1,DNAJA1                | 2 |
| Cardiovascular System Development and Function        | function            | function of blood-brain barrier        | 1.45E-02 | AGT,VWF                     | 2 |
| Nervous System Development and Function               | function            | function of blood-brain barrier        | 1.45E-02 | AGT,VWF                     | 2 |
| Organ Development                                     | function            | function of blood-brain barrier        | 1.45E-02 | AGT,VWF                     | 2 |
| Cardiovascular System Development and Function        | systole             | systole                                | 1.45E-02 | AGT,MYH7                    | 2 |
| Organ Morphology                                      | systole             | systole                                | 1.45E-02 | AGT,MYH7                    | 2 |
| Cell Morphology                                       | abnormal morphology | abnormal morphology of T lymphocytes   | 1.51E-02 | LGALS3,PRKCH,R<br>CAN1      | 3 |
| Hematological System Development and Function         | abnormal morphology | abnormal morphology of T lymphocytes   | 1.51E-02 | LGALS3,PRKCH,R<br>CAN1      | 3 |
| Cardiovascular Disease                                | aneurysm            | aneurysm                               | 1.51E-02 | AGT,ANGPT2,RCA<br>N1        | 3 |
| Cellular Development                                  | differentiation     | differentiation of smooth muscle cells | 1.51E-02 | ADCY6,AGT,ENG               | 3 |
| Skeletal and Muscular System Development and Function | differentiation     | differentiation of smooth muscle cells | 1.51E-02 | ADCY6,AGT,ENG               | 3 |
| Free Radical Scavenging                               | production          | production of hydrogen peroxide        | 1.51E-02 | AGT,ANGPT2,LCLA<br>T1       | 3 |
| Small Molecule Biochemistry                           | production          | production of hydrogen peroxide        | 1.51E-02 | AGT,ANGPT2,LCLA<br>T1       | 3 |
| Organ Morphology                                      | abnormal morphology | abnormal morphology of                 | 1.57E-02 | BRSK1,MANBA,NC<br>OA6,NR1H3 | 4 |

|                                                      |                           |                                            |          |                                                                                    |    |
|------------------------------------------------------|---------------------------|--------------------------------------------|----------|------------------------------------------------------------------------------------|----|
|                                                      |                           | cerebral ventricles                        |          |                                                                                    |    |
| Nervous System Development and Function              | abnormal morphology       | abnormal morphology of cerebral ventricles | 1.57E-02 | BRSK1,MANBA,NC OA6,NR1H3                                                           | 4  |
| Small Molecule Biochemistry                          | homeostasis               | homeostasis of cholesterol                 | 1.68E-02 | DBI,NR1H3,TMEM97                                                                   | 3  |
| Vitamin and Mineral Metabolism                       | homeostasis               | homeostasis of cholesterol                 | 1.68E-02 | DBI,NR1H3,TMEM97                                                                   | 3  |
| Lipid Metabolism                                     | homeostasis               | homeostasis of cholesterol                 | 1.68E-02 | DBI,NR1H3,TMEM97                                                                   | 3  |
| Cellular Development                                 | proliferation             | proliferation of endocrine cells           | 1.68E-02 | AGT,ANGPT2,NCOA6                                                                   | 3  |
| Cellular Growth and Proliferation                    | proliferation             | proliferation of endocrine cells           | 1.68E-02 | AGT,ANGPT2,NCOA6                                                                   | 3  |
| Post-Translational Modification                      | phosphorylation           | phosphorylation of protein                 | 1.70E-02 | AGT,ATXN1,BMPR1A,BRSK1,CDC42BPB,CSNK2A2,ENG,FAM129A,POLR2G,PRKAR1A,PRKCH,STK38,VWF | 13 |
| Organ Morphology                                     | abnormal morphology       | abnormal morphology of choroid plexus      | 1.79E-02 | MANBA,NR1H3                                                                        | 2  |
| Nervous System Development and Function              | abnormal morphology       | abnormal morphology of choroid plexus      | 1.79E-02 | MANBA,NR1H3                                                                        | 2  |
| Cell Death and Survival                              | apoptosis                 | apoptosis of spermatocytes                 | 1.79E-02 | CSNK2A2,GPX4                                                                       | 2  |
| Cancer                                               | esophageal adenocarcinoma | esophageal adenocarcinoma                  | 1.79E-02 | ENG,GSS                                                                            | 2  |
| Gastrointestinal Disease                             | esophageal adenocarcinoma | esophageal adenocarcinoma                  | 1.79E-02 | ENG,GSS                                                                            | 2  |
| Renal and Urological System Development and Function | osmolality                | osmolality of urine                        | 1.79E-02 | ADCY6,AGT                                                                          | 2  |
| Cell-To-Cell Signaling and Interaction               | paired-pulse facilitation | paired-pulse facilitation of synapse       | 1.79E-02 | ATXN1,GRIK2                                                                        | 2  |
| Nervous System Development and Function              | paired-pulse facilitation | paired-pulse facilitation of synapse       | 1.79E-02 | ATXN1,GRIK2                                                                        | 2  |
| Cellular Function and Maintenance                    | paired-pulse facilitation | paired-pulse facilitation of synapse       | 1.79E-02 | ATXN1,GRIK2                                                                        | 2  |
| Renal and Urological Disease                         | polydipsia                | polydipsia                                 | 1.79E-02 | AGT,LCLAT1                                                                         | 2  |

|                                         |                                 |                                 |          |                                                                                                     |    |
|-----------------------------------------|---------------------------------|---------------------------------|----------|-----------------------------------------------------------------------------------------------------|----|
| Organ Morphology                        | quantity                        | quantity of hair follicle       | 1.79E-02 | BMPR1A,NCOA6                                                                                        | 2  |
| Hair and Skin Development and Function  | quantity                        | quantity of hair follicle       | 1.79E-02 | BMPR1A,NCOA6                                                                                        | 2  |
| Cellular Development                    | proliferation                   | proliferation of neuroglia      | 1.81E-02 | AGT,DBI,NR1H3,PRKCH                                                                                 | 4  |
| Cellular Growth and Proliferation       | proliferation                   | proliferation of neuroglia      | 1.81E-02 | AGT,DBI,NR1H3,PRKCH                                                                                 | 4  |
| Nervous System Development and Function | proliferation                   | proliferation of neuroglia      | 1.81E-02 | AGT,DBI,NR1H3,PRKCH                                                                                 | 4  |
| Organismal Injury and Abnormalities     | wound                           | Wound                           | 1.86E-02 | CAPN1,ENG,LGALS3,NCOA6,PRKCH                                                                        | 5  |
| Developmental Disorder                  | hypertrophy                     | Hypertrophy                     | 1.88E-02 | ADCY6,AGT,ANGPT2,BMPR1A,FHL2,MYH7,NR1H3,RCAN1,RRAD,TXN                                              | 10 |
| Neurological Disease                    | neuromuscular disease           | neuromuscular disease           | 1.91E-02 | AGT,CHGB,DNAJA1,EIF4G1,GRIK2,HSPA5,HSPB1,LAPTM4B,MYH7,RCAN1,RERE,RHOBTB3,RIPK2,SERPINI1,TXN,ZNF385B | 16 |
| Skeletal and Muscular Disorders         | neuromuscular disease           | neuromuscular disease           | 1.91E-02 | AGT,CHGB,DNAJA1,EIF4G1,GRIK2,HSPA5,HSPB1,LAPTM4B,MYH7,RCAN1,RERE,RHOBTB3,RIPK2,SERPINI1,TXN,ZNF385B | 16 |
| Neurological Disease                    | disorder of basal ganglia       | disorder of basal ganglia       | 1.93E-02 | CHGB,DNAJA1,EIF4G1,GRIK2,HSPA5,HSPB1,LAPTM4B,MYH7,RCAN1,RERE,RHOBTB3,RIPK2,SERPINI1,TXN,ZNF385B     | 15 |
| Endocrine System Disorders              | experimentally-induced diabetes | experimentally-induced diabetes | 1.94E-02 | AGT,HSPB1,LGALS3,PPT2                                                                               | 4  |
| Gastrointestinal Disease                | experimentally-induced diabetes | experimentally-induced diabetes | 1.94E-02 | AGT,HSPB1,LGALS3,PPT2                                                                               | 4  |
| Metabolic Disease                       | experimentally-induced diabetes | experimentally-induced diabetes | 1.94E-02 | AGT,HSPB1,LGALS3,PPT2                                                                               | 4  |
| Reproductive System Disease             | infertility                     | infertility                     | 1.96E-02 | CBS,CSNK2A2,GJA4,NCOA6,NR1H3,SCMH1,TARBP2                                                           | 7  |
| Organismal                              | damage                          | damage of heart                 | 2.06E-02 | AGT,MYH7,TXN                                                                                        | 3  |

|                                        |                                            |                                            |          |                                                                                                                     |    |
|----------------------------------------|--------------------------------------------|--------------------------------------------|----------|---------------------------------------------------------------------------------------------------------------------|----|
| Injury and Abnormalities               |                                            |                                            |          |                                                                                                                     |    |
| Cardiovascular Disease                 | damage                                     | damage of heart                            | 2.06E-02 | AGT,MYH7,TXN                                                                                                        | 3  |
| Neurological Disease                   | movement disorder                          | Movement Disorders                         | 2.10E-02 | ATXN1,BRSK1,CHGB,DNAJA1,EIF4G1,GRIK2,HSPA5,HS PB1,LAPTM4B,MYH7,PPT2,RCAN1,RE RE,RHOBTB3,RIPK2,SERPINI1,TXN,Z NF385B | 18 |
| Ophthalmic Disease                     | Bietti's crystalline retinopathy           | Bietti's crystalline retinopathy           | 2.12E-02 | CYP4V2                                                                                                              | 1  |
| Cancer                                 | Carney complex type 2                      | Carney complex type 2                      | 2.12E-02 | PRKAR1A                                                                                                             | 1  |
| Cardiovascular Disease                 | Carney complex type 2                      | Carney complex type 2                      | 2.12E-02 | PRKAR1A                                                                                                             | 1  |
| Hereditary Disorder                    | Carney complex type 2                      | Carney complex type 2                      | 2.12E-02 | PRKAR1A                                                                                                             | 1  |
| Dermatological Diseases and Conditions | Carney complex type 2                      | Carney complex type 2                      | 2.12E-02 | PRKAR1A                                                                                                             | 1  |
| Neurological Disease                   | Charcot-Marie-Tooth disease axonal type 2f | Charcot-Marie-Tooth disease axonal type 2f | 2.12E-02 | HSPB1                                                                                                               | 1  |
| Skeletal and Muscular Disorders        | Charcot-Marie-Tooth disease axonal type 2f | Charcot-Marie-Tooth disease axonal type 2f | 2.12E-02 | HSPB1                                                                                                               | 1  |
| Hereditary Disorder                    | Charcot-Marie-Tooth disease axonal type 2f | Charcot-Marie-Tooth disease axonal type 2f | 2.12E-02 | HSPB1                                                                                                               | 1  |
| Developmental Disorder                 | Laing-type distal myopathy                 | Laing-type distal myopathy                 | 2.12E-02 | MYH7                                                                                                                | 1  |
| Skeletal and Muscular Disorders        | Laing-type distal myopathy                 | Laing-type distal myopathy                 | 2.12E-02 | MYH7                                                                                                                | 1  |
| Hereditary Disorder                    | Laing-type distal myopathy                 | Laing-type distal myopathy                 | 2.12E-02 | MYH7                                                                                                                | 1  |
| Skeletal and Muscular Disorders        | Myosin storage myopathy                    | Myosin storage myopathy                    | 2.12E-02 | MYH7                                                                                                                | 1  |
| Hereditary Disorder                    | Myosin storage myopathy                    | Myosin storage myopathy                    | 2.12E-02 | MYH7                                                                                                                | 1  |
| Neurological Disease                   | Navajo neurohepatopathy                    | Navajo neurohepatopathy                    | 2.12E-02 | MPV17                                                                                                               | 1  |
| Hereditary Disorder                    | Navajo neurohepatopathy                    | Navajo neurohepatopathy                    | 2.12E-02 | MPV17                                                                                                               | 1  |
| Gastrointestinal Disease               | Navajo neurohepatopathy                    | Navajo neurohepatopathy                    | 2.12E-02 | MPV17                                                                                                               | 1  |
| Hepatic System                         | Navajo                                     | Navajo                                     | 2.12E-02 | MPV17                                                                                                               | 1  |

|                                               |                           |                                                    |          |        |   |
|-----------------------------------------------|---------------------------|----------------------------------------------------|----------|--------|---|
| Disease                                       | neurohepatopathy          | neurohepatopathy                                   |          |        |   |
| Neurological Disease                          | Parkinson disease type 18 | Parkinson disease type 18                          | 2.12E-02 | EIF4G1 | 1 |
| Skeletal and Muscular Disorders               | Parkinson disease type 18 | Parkinson disease type 18                          | 2.12E-02 | EIF4G1 | 1 |
| Hereditary Disorder                           | Parkinson disease type 18 | Parkinson disease type 18                          | 2.12E-02 | EIF4G1 | 1 |
| Organ Morphology                              | abnormal morphology       | abnormal morphology of Ammon's horn                | 2.12E-02 | MANBA  | 1 |
| Nervous System Development and Function       | abnormal morphology       | abnormal morphology of Ammon's horn                | 2.12E-02 | MANBA  | 1 |
| Organ Morphology                              | abnormal morphology       | abnormal morphology of deep cerebellar nucleus     | 2.12E-02 | MANBA  | 1 |
| Nervous System Development and Function       | abnormal morphology       | abnormal morphology of deep cerebellar nucleus     | 2.12E-02 | MANBA  | 1 |
| Tissue Morphology                             | abnormal morphology       | abnormal morphology of disorganized cortical plate | 2.12E-02 | BRSK1  | 1 |
| Organ Morphology                              | abnormal morphology       | abnormal morphology of enlarged pancreas           | 2.12E-02 | PPT2   | 1 |
| Endocrine System Development and Function     | abnormal morphology       | abnormal morphology of enlarged pancreas           | 2.12E-02 | PPT2   | 1 |
| Digestive System Development and Function     | abnormal morphology       | abnormal morphology of enlarged pancreas           | 2.12E-02 | PPT2   | 1 |
| Cell Morphology                               | abnormal morphology       | abnormal morphology of monocytes                   | 2.12E-02 | LGALS3 | 1 |
| Hematological System Development and Function | abnormal morphology       | abnormal morphology of monocytes                   | 2.12E-02 | LGALS3 | 1 |
| Inflammatory Response                         | abnormal morphology       | abnormal morphology of monocytes                   | 2.12E-02 | LGALS3 | 1 |
| Tissue Morphology                             | abnormal morphology       | abnormal morphology of prickle cells               | 2.12E-02 | CBS    | 1 |
| Cell Morphology                               | abnormal morphology       | abnormal morphology of                             | 2.12E-02 | CBS    | 1 |

|                                                       |                        |                                                  |          |         |   |
|-------------------------------------------------------|------------------------|--------------------------------------------------|----------|---------|---|
|                                                       |                        | prickle cells                                    |          |         |   |
| Small Molecule Biochemistry                           | accumulation           | accumulation of porphyrin                        | 2.12E-02 | UROD    | 1 |
| Molecular Transport                                   | accumulation           | accumulation of porphyrin                        | 2.12E-02 | UROD    | 1 |
| Developmental Disorder                                | acro dysostosis type 1 | acro dysostosis type 1                           | 2.12E-02 | PRKAR1A | 1 |
| Skeletal and Muscular Disorders                       | acro dysostosis type 1 | acro dysostosis type 1                           | 2.12E-02 | PRKAR1A | 1 |
| Hereditary Disorder                                   | acro dysostosis type 1 | acro dysostosis type 1                           | 2.12E-02 | PRKAR1A | 1 |
| Connective Tissue Disorders                           | acro dysostosis type 1 | acro dysostosis type 1                           | 2.12E-02 | PRKAR1A | 1 |
| Cell-To-Cell Signaling and Interaction                | activation             | activation of kidney cancer cell lines           | 2.12E-02 | AGT     | 1 |
| Cardiovascular Disease                                | aneurysm               | aneurysm of abdominal aorta                      | 2.12E-02 | AGT     | 1 |
| Cell Death and Survival                               | apoptosis              | apoptosis of medial smooth muscle cells          | 2.12E-02 | AGT     | 1 |
| Cell Death and Survival                               | apoptosis              | apoptosis of primary spermatocytes               | 2.12E-02 | GPX4    | 1 |
| Cellular Development                                  | arborization           | arborization of vascular smooth muscle cells     | 2.12E-02 | ADCY6   | 1 |
| Skeletal and Muscular System Development and Function | arborization           | arborization of vascular smooth muscle cells     | 2.12E-02 | ADCY6   | 1 |
| Cardiovascular System Development and Function        | area                   | area of ventricular myocytes                     | 2.12E-02 | AGT     | 1 |
| Skeletal and Muscular System Development and Function | area                   | area of ventricular myocytes                     | 2.12E-02 | AGT     | 1 |
| Cell Morphology                                       | area                   | area of ventricular myocytes                     | 2.12E-02 | AGT     | 1 |
| Cell Cycle                                            | G1 phase               | arrest in G1 phase of cervical cancer cell lines | 2.12E-02 | STK38   | 1 |
| Cell Cycle                                            | G2/M phase             | arrest in G2/M phase of skin cancer cell lines   | 2.12E-02 | CDH13   | 1 |
| Cell Cycle                                            | G2/M phase             | arrest in G2/M phase of                          | 2.12E-02 | CDH13   | 1 |

|                                                      |                                                           |                                                                              |          |          |   |
|------------------------------------------------------|-----------------------------------------------------------|------------------------------------------------------------------------------|----------|----------|---|
|                                                      |                                                           | squamous cell carcinoma cell lines                                           |          |          |   |
| Cellular Development                                 | growth                                                    | arrest in growth of skin cell lines                                          | 2.12E-02 | ENG      | 1 |
| Cellular Growth and Proliferation                    | growth                                                    | arrest in growth of skin cell lines                                          | 2.12E-02 | ENG      | 1 |
| Hair and Skin Development and Function               | growth                                                    | arrest in growth of skin cell lines                                          | 2.12E-02 | ENG      | 1 |
| Cancer                                               | atrial myxoma                                             | atrial myxoma                                                                | 2.12E-02 | PRKAR1A  | 1 |
| Cell-To-Cell Signaling and Interaction               | attachment                                                | attachment of RPE cells                                                      | 2.12E-02 | LGALS3   | 1 |
| Tissue Development                                   | attachment                                                | attachment of RPE cells                                                      | 2.12E-02 | LGALS3   | 1 |
| Cell-To-Cell Signaling and Interaction               | attachment                                                | attachment of prostate cells                                                 | 2.12E-02 | ENG      | 1 |
| Reproductive System Development and Function         | attachment                                                | attachment of prostate cells                                                 | 2.12E-02 | ENG      | 1 |
| Tissue Development                                   | attachment                                                | attachment of prostate cells                                                 | 2.12E-02 | ENG      | 1 |
| Post-Translational Modification                      | autoprocessing                                            | autoprocessing of protein                                                    | 2.12E-02 | CAPN1    | 1 |
| Renal and Urological System Development and Function | autoregulation                                            | autoregulation of kidney                                                     | 2.12E-02 | AGT      | 1 |
| Organismal Functions                                 | autoregulation                                            | autoregulation of kidney                                                     | 2.12E-02 | AGT      | 1 |
| Neurological Disease                                 | familial encephalopathy with neuroserpin inclusion bodies | autosomal dominant familial encephalopathy with neuroserpin inclusion bodies | 2.12E-02 | SERPINI1 | 1 |
| Neurological Disease                                 | autosomal recessive deafness DFNB29                       | autosomal recessive deafness DFNB29                                          | 2.12E-02 | CLDN14   | 1 |
| Hereditary Disorder                                  | autosomal recessive deafness DFNB29                       | autosomal recessive deafness DFNB29                                          | 2.12E-02 | CLDN14   | 1 |
| Auditory Disease                                     | autosomal recessive deafness DFNB29                       | autosomal recessive deafness DFNB29                                          | 2.12E-02 | CLDN14   | 1 |
| Neurological                                         | autosomal                                                 | autosomal                                                                    | 2.12E-02 | CLDN14   | 1 |

|                                                |                                                     |                                                     |          |        |   |
|------------------------------------------------|-----------------------------------------------------|-----------------------------------------------------|----------|--------|---|
| Disease                                        | recessive deafness type 29                          | recessive deafness type 29                          |          |        |   |
| Hereditary Disorder                            | autosomal recessive deafness type 29                | autosomal recessive deafness type 29                | 2.12E-02 | CLDN14 | 1 |
| Auditory Disease                               | autosomal recessive deafness type 29                | autosomal recessive deafness type 29                | 2.12E-02 | CLDN14 | 1 |
| Developmental Disorder                         | autosomal recessive nonsyndromic mental retardation | autosomal recessive nonsyndromic mental retardation | 2.12E-02 | GRIK2  | 1 |
| Neurological Disease                           | autosomal recessive nonsyndromic mental retardation | autosomal recessive nonsyndromic mental retardation | 2.12E-02 | GRIK2  | 1 |
| Nervous System Development and Function        | baroreceptor reflex                                 | baroreceptor reflex of artery                       | 2.12E-02 | AGT    | 1 |
| Developmental Disorder                         | beta-mannosidosis                                   | beta-mannosidosis                                   | 2.12E-02 | MANBA  | 1 |
| Hereditary Disorder                            | beta-mannosidosis                                   | beta-mannosidosis                                   | 2.12E-02 | MANBA  | 1 |
| Metabolic Disease                              | beta-mannosidosis                                   | beta-mannosidosis                                   | 2.12E-02 | MANBA  | 1 |
| Connective Tissue Disorders                    | beta-mannosidosis                                   | beta-mannosidosis                                   | 2.12E-02 | MANBA  | 1 |
| Gene Expression                                | binding                                             | binding of CRE-like element                         | 2.12E-02 | ADCY6  | 1 |
| Gene Expression                                | binding                                             | binding of TCF binding site                         | 2.12E-02 | BMPR1A | 1 |
| Gene Expression                                | binding                                             | binding of dioxin responsive element                | 2.12E-02 | TXN    | 1 |
| Organismal Injury and Abnormalities            | bleeding                                            | bleeding of tumor                                   | 2.12E-02 | VWF    | 1 |
| Cancer                                         | bleeding                                            | bleeding of tumor                                   | 2.12E-02 | VWF    | 1 |
| Cardiovascular System Development and Function | blood pressure                                      | blood pressure of pulmonary alveolus                | 2.12E-02 | AGT    | 1 |
| Respiratory System Development and Function    | blood pressure                                      | blood pressure of pulmonary alveolus                | 2.12E-02 | AGT    | 1 |
| Cardiovascular                                 | capillary leak                                      | capillary leak                                      | 2.12E-02 | ANGPT2 | 1 |

| Disease                                               | syndrome               | syndrome                                    |          |        |   |
|-------------------------------------------------------|------------------------|---------------------------------------------|----------|--------|---|
| Cardiovascular System Development and Function        | cardiac index          | cardiac index                               | 2.12E-02 | ENG    | 1 |
| Small Molecule Biochemistry                           | catabolism             | catabolism of L-serine                      | 2.12E-02 | CBS    | 1 |
| Amino Acid Metabolism                                 | catabolism             | catabolism of L-serine                      | 2.12E-02 | CBS    | 1 |
| Cell Cycle                                            | cell cycle progression | cell cycle progression of adipoblasts       | 2.12E-02 | AGT    | 1 |
| Connective Tissue Development and Function            | cell cycle progression | cell cycle progression of adipoblasts       | 2.12E-02 | AGT    | 1 |
| Cell Death and Survival                               | cell death             | cell death of fibrosarcoma cells            | 2.12E-02 | TXN    | 1 |
| Tumor Morphology                                      | cell death             | cell death of fibrosarcoma cells            | 2.12E-02 | TXN    | 1 |
| Cell Morphology                                       | cell flattening        | cell flattening of keratinocytes            | 2.12E-02 | PRKCH  | 1 |
| Hair and Skin Development and Function                | cell flattening        | cell flattening of keratinocytes            | 2.12E-02 | PRKCH  | 1 |
| Skeletal and Muscular System Development and Function | cell movement          | cell movement of osteoclast-like cells      | 2.12E-02 | CAPN1  | 1 |
| Cellular Movement                                     | cell movement          | cell movement of osteoclast-like cells      | 2.12E-02 | CAPN1  | 1 |
| Connective Tissue Development and Function            | cell movement          | cell movement of osteoclast-like cells      | 2.12E-02 | CAPN1  | 1 |
| Cellular Movement                                     | cell movement          | cell movement of single positive thymocytes | 2.12E-02 | HNRNPL | 1 |
| Hematological System Development and Function         | cell movement          | cell movement of single positive thymocytes | 2.12E-02 | HNRNPL | 1 |
| Immune Cell Trafficking                               | cell movement          | cell movement of single positive thymocytes | 2.12E-02 | HNRNPL | 1 |
| Cell-mediated Immune Response                         | cell movement          | cell movement of single positive thymocytes | 2.12E-02 | HNRNPL | 1 |
| Cell Morphology                                       | cell spreading         | cell spreading of RPE cells                 | 2.12E-02 | LGALS3 | 1 |
| Developmental                                         | central core           | central core                                | 2.12E-02 | MYH7   | 1 |

|                                                       |                      |                                                |          |        |   |
|-------------------------------------------------------|----------------------|------------------------------------------------|----------|--------|---|
| Disorder                                              | disease              | disease                                        |          |        |   |
| Skeletal and Muscular Disorders                       | central core disease | central core disease                           | 2.12E-02 | MYH7   | 1 |
| Hereditary Disorder                                   | central core disease | central core disease                           | 2.12E-02 | MYH7   | 1 |
| Cellular Assembly and Organization                    | clustering           | clustering of lipid droplets                   | 2.12E-02 | ATG2A  | 1 |
| Cellular Compromise                                   | collapse             | collapse of actin cytoskeleton                 | 2.12E-02 | SORBS2 | 1 |
| Cell Morphology                                       | collapse             | collapse of actin cytoskeleton                 | 2.12E-02 | SORBS2 | 1 |
| Small Molecule Biochemistry                           | composition          | composition of phosphatidylinositol            | 2.12E-02 | LCLAT1 | 1 |
| Lipid Metabolism                                      | composition          | composition of phosphatidylinositol            | 2.12E-02 | LCLAT1 | 1 |
| Small Molecule Biochemistry                           | concentration        | concentration of 6-keto-prostaglandin F1 alpha | 2.12E-02 | AGT    | 1 |
| Molecular Transport                                   | concentration        | concentration of 6-keto-prostaglandin F1 alpha | 2.12E-02 | AGT    | 1 |
| Lipid Metabolism                                      | concentration        | concentration of 6-keto-prostaglandin F1 alpha | 2.12E-02 | AGT    | 1 |
| Cell-To-Cell Signaling and Interaction                | conductance          | conductance of gap junctions                   | 2.12E-02 | AGT    | 1 |
| Cardiovascular System Development and Function        | contraction          | contraction of afferent arterioles             | 2.12E-02 | AGT    | 1 |
| Tissue Morphology                                     | contraction          | contraction of afferent arterioles             | 2.12E-02 | AGT    | 1 |
| Organ Morphology                                      | contraction          | contraction of anococcygeus smooth muscle      | 2.12E-02 | AGT    | 1 |
| Skeletal and Muscular System Development and Function | contraction          | contraction of anococcygeus smooth muscle      | 2.12E-02 | AGT    | 1 |
| Cardiovascular System Development and Function        | contraction          | contraction of carotid artery                  | 2.12E-02 | AGT    | 1 |
| Tissue Morphology                                     | contraction          | contraction of carotid artery                  | 2.12E-02 | AGT    | 1 |

|                                                      |              |                                                         |          |        |   |
|------------------------------------------------------|--------------|---------------------------------------------------------|----------|--------|---|
| Cell Morphology                                      | contraction  | contraction of mesangial cells                          | 2.12E-02 | AGT    | 1 |
| Renal and Urological System Development and Function | contraction  | contraction of mesangial cells                          | 2.12E-02 | AGT    | 1 |
| Cardiovascular System Development and Function       | contraction  | contraction of renal artery                             | 2.12E-02 | AGT    | 1 |
| Organ Morphology                                     | contraction  | contraction of renal artery                             | 2.12E-02 | AGT    | 1 |
| Tissue Morphology                                    | contraction  | contraction of renal artery                             | 2.12E-02 | AGT    | 1 |
| Renal and Urological System Development and Function | contraction  | contraction of renal artery                             | 2.12E-02 | AGT    | 1 |
| Organismal Injury and Abnormalities                  | contusion    | contusion                                               | 2.12E-02 | CAPN1  | 1 |
| Post-Translational Modification                      | conversion   | conversion of L-serine                                  | 2.12E-02 | CBS    | 1 |
| Small Molecule Biochemistry                          | conversion   | conversion of L-serine                                  | 2.12E-02 | CBS    | 1 |
| Amino Acid Metabolism                                | conversion   | conversion of L-serine                                  | 2.12E-02 | CBS    | 1 |
| Small Molecule Biochemistry                          | conversion   | conversion of leukotriene B4                            | 2.12E-02 | LTA4H  | 1 |
| Lipid Metabolism                                     | conversion   | conversion of leukotriene B4                            | 2.12E-02 | LTA4H  | 1 |
| Cancer                                               | conversion   | conversion of spindle cell-type squamous cell carcinoma | 2.12E-02 | ENG    | 1 |
| Tumor Morphology                                     | conversion   | conversion of spindle cell-type squamous cell carcinoma | 2.12E-02 | ENG    | 1 |
| Cell Death and Survival                              | cytotoxicity | cytotoxicity of eosinophils                             | 2.12E-02 | TXN    | 1 |
| Cell-To-Cell Signaling and Interaction               | deadhesion   | deadhesion of endothelial cell lines                    | 2.12E-02 | CDH13  | 1 |
| Tissue Development                                   | deadhesion   | deadhesion of endothelial cell lines                    | 2.12E-02 | CDH13  | 1 |
| Cardiovascular System Development and Function       | density      | density of vasculature                                  | 2.12E-02 | ANGPT2 | 1 |
| Cell-To-Cell                                         | detachment   | detachment of                                           | 2.12E-02 | ENG    | 1 |

|                                                |             |                                          |          |         |   |
|------------------------------------------------|-------------|------------------------------------------|----------|---------|---|
| Signaling and Interaction                      |             | prostate cell lines                      |          |         |   |
| Tissue Development                             | detachment  | detachment of prostate cell lines        | 2.12E-02 | ENG     | 1 |
| Organismal Development                         | development | development of apical ectodermal ridge   | 2.12E-02 | BMPR1A  | 1 |
| Tissue Development                             | development | development of apical ectodermal ridge   | 2.12E-02 | BMPR1A  | 1 |
| Embryonic Development                          | development | development of apical ectodermal ridge   | 2.12E-02 | BMPR1A  | 1 |
| Organismal Development                         | development | development of body trunk                | 2.12E-02 | PRKAR1A | 1 |
| Embryonic Development                          | development | development of body trunk                | 2.12E-02 | PRKAR1A | 1 |
| Cellular Development                           | development | development of syncytiotrophoblast cells | 2.12E-02 | ENG     | 1 |
| Organismal Development                         | development | development of syncytiotrophoblast cells | 2.12E-02 | ENG     | 1 |
| Organ Development                              | development | development of syncytiotrophoblast cells | 2.12E-02 | ENG     | 1 |
| Reproductive System Development and Function   | development | development of syncytiotrophoblast cells | 2.12E-02 | ENG     | 1 |
| Tissue Development                             | development | development of syncytiotrophoblast cells | 2.12E-02 | ENG     | 1 |
| Embryonic Development                          | development | development of syncytiotrophoblast cells | 2.12E-02 | ENG     | 1 |
| Cardiovascular System Development and Function | diameter    | diameter of afferent arterioles          | 2.12E-02 | AGT     | 1 |
| Tissue Morphology                              | diameter    | diameter of afferent arterioles          | 2.12E-02 | AGT     | 1 |
| Cardiovascular System Development and Function | diameter    | diameter of aorta                        | 2.12E-02 | AGT     | 1 |
| Tissue Morphology                              | diameter    | diameter of aorta                        | 2.12E-02 | AGT     | 1 |
| Cardiovascular System Development and Function | diameter    | diameter of blood vessel lumen           | 2.12E-02 | ANGPT2  | 1 |
| Cardiovascular                                 | diameter    | diameter of                              | 2.12E-02 | ANGPT2  | 1 |

|                                                      |                                             |                                             |          |        |   |
|------------------------------------------------------|---------------------------------------------|---------------------------------------------|----------|--------|---|
| System Development and Function                      |                                             | capillary vessel                            |          |        |   |
| Tissue Morphology                                    | diameter                                    | diameter of capillary vessel                | 2.12E-02 | ANGPT2 | 1 |
| Cardiovascular System Development and Function       | diameter                                    | diameter of efferent glomerular arteriole   | 2.12E-02 | AGT    | 1 |
| Tissue Morphology                                    | diameter                                    | diameter of efferent glomerular arteriole   | 2.12E-02 | AGT    | 1 |
| Renal and Urological System Development and Function | diameter                                    | diameter of efferent glomerular arteriole   | 2.12E-02 | AGT    | 1 |
| Cellular Development                                 | differentiation                             | differentiation of inner root sheath        | 2.12E-02 | BMPR1A | 1 |
| Organ Development                                    | differentiation                             | differentiation of inner root sheath        | 2.12E-02 | BMPR1A | 1 |
| Hair and Skin Development and Function               | differentiation                             | differentiation of inner root sheath        | 2.12E-02 | BMPR1A | 1 |
| Cardiovascular System Development and Function       | dilation                                    | dilation of sinus venosus                   | 2.12E-02 | NCOA6  | 1 |
| Tissue Morphology                                    | dilation                                    | dilation of sinus venosus                   | 2.12E-02 | NCOA6  | 1 |
| Embryonic Development                                | dilation                                    | dilation of sinus venosus                   | 2.12E-02 | NCOA6  | 1 |
| Tissue Morphology                                    | disorganization                             | disorganization of seminiferous epithelium  | 2.12E-02 | GPX4   | 1 |
| Small Molecule Biochemistry                          | distribution                                | distribution of triacylglycerol             | 2.12E-02 | CBS    | 1 |
| Molecular Transport                                  | distribution                                | distribution of triacylglycerol             | 2.12E-02 | CBS    | 1 |
| Lipid Metabolism                                     | distribution                                | distribution of triacylglycerol             | 2.12E-02 | CBS    | 1 |
| Neurological Disease                                 | early infantile epileptic encephalopathy 10 | early infantile epileptic encephalopathy 10 | 2.12E-02 | PNKP   | 1 |
| Organismal Injury and Abnormalities                  | edema                                       | edema of lateral cerebral ventricle         | 2.12E-02 | ENG    | 1 |
| Neurological Disease                                 | edema                                       | edema of lateral cerebral ventricle         | 2.12E-02 | ENG    | 1 |
| Ophthalmic                                           | enophthalmos                                | enophthalmos                                | 2.12E-02 | BMPR1A | 1 |

|                                                |                                            |                                                |          |       |   |
|------------------------------------------------|--------------------------------------------|------------------------------------------------|----------|-------|---|
| Disease                                        |                                            |                                                |          |       |   |
| Organismal Injury and Abnormalities            | epidermolysis bullosa letalis              | epidermolysis bullosa letalis                  | 2.12E-02 | LAMB3 | 1 |
| Developmental Disorder                         | epidermolysis bullosa letalis              | epidermolysis bullosa letalis                  | 2.12E-02 | LAMB3 | 1 |
| Hereditary Disorder                            | epidermolysis bullosa letalis              | epidermolysis bullosa letalis                  | 2.12E-02 | LAMB3 | 1 |
| Connective Tissue Disorders                    | epidermolysis bullosa letalis              | epidermolysis bullosa letalis                  | 2.12E-02 | LAMB3 | 1 |
| Dermatological Diseases and Conditions         | epidermolysis bullosa letalis              | epidermolysis bullosa letalis                  | 2.12E-02 | LAMB3 | 1 |
| Cellular Development                           | erythropoiesis                             | erythropoiesis of embryonic stem cells         | 2.12E-02 | ENG   | 1 |
| Organismal Development                         | erythropoiesis                             | erythropoiesis of embryonic stem cells         | 2.12E-02 | ENG   | 1 |
| Hematological System Development and Function  | erythropoiesis                             | erythropoiesis of embryonic stem cells         | 2.12E-02 | ENG   | 1 |
| Embryonic Development                          | erythropoiesis                             | erythropoiesis of embryonic stem cells         | 2.12E-02 | ENG   | 1 |
| Hematopoiesis                                  | erythropoiesis                             | erythropoiesis of embryonic stem cells         | 2.12E-02 | ENG   | 1 |
| Molecular Transport                            | excretion                                  | excretion of nitrate                           | 2.12E-02 | AGT   | 1 |
| Small Molecule Biochemistry                    | excretion                                  | excretion of nitrite                           | 2.12E-02 | AGT   | 1 |
| Molecular Transport                            | excretion                                  | excretion of nitrite                           | 2.12E-02 | AGT   | 1 |
| Molecular Transport                            | excretion                                  | excretion of water                             | 2.12E-02 | ADCY6 | 1 |
| Cardiovascular System Development and Function | expansion                                  | expansion of suprarenal aorta                  | 2.12E-02 | AGT   | 1 |
| Tissue Morphology                              | expansion                                  | expansion of suprarenal aorta                  | 2.12E-02 | AGT   | 1 |
| Organismal Development                         | expansion                                  | expansion of suprarenal aorta                  | 2.12E-02 | AGT   | 1 |
| Neurological Disease                           | experimental spinocerebellar ataxia type 1 | experimental spinocerebellar ataxia type 1     | 2.12E-02 | ATXN1 | 1 |
| Hereditary Disorder                            | experimental spinocerebellar ataxia type 1 | experimental spinocerebellar ataxia type 1     | 2.12E-02 | ATXN1 | 1 |
| Skeletal and Muscular Disorders                | experimentally-induced arthritis           | experimentally-induced arthritis of knee joint | 2.12E-02 | RIPK2 | 1 |

|                                                      |                                  |                                                |          |        |   |
|------------------------------------------------------|----------------------------------|------------------------------------------------|----------|--------|---|
| Connective Tissue Disorders                          | experimentally-induced arthritis | experimentally-induced arthritis of knee joint | 2.12E-02 | RIPK2  | 1 |
| Inflammatory Disease                                 | experimentally-induced arthritis | experimentally-induced arthritis of knee joint | 2.12E-02 | RIPK2  | 1 |
| Nervous System Development and Function              | extension                        | extension of climbing fiber                    | 2.12E-02 | ATXN1  | 1 |
| Cellular Assembly and Organization                   | extension                        | extension of climbing fiber                    | 2.12E-02 | ATXN1  | 1 |
| Cellular Function and Maintenance                    | extension                        | extension of climbing fiber                    | 2.12E-02 | ATXN1  | 1 |
| Cell Morphology                                      | extension                        | extension of climbing fiber                    | 2.12E-02 | ATXN1  | 1 |
| Organismal Injury and Abnormalities                  | fatigue                          | fatigue of soleus muscle                       | 2.12E-02 | RCAN1  | 1 |
| Skeletal and Muscular Disorders                      | fatigue                          | fatigue of soleus muscle                       | 2.12E-02 | RCAN1  | 1 |
| Organismal Injury and Abnormalities                  | fibrosis                         | fibrosis of atrioventricular node              | 2.12E-02 | BMPR1A | 1 |
| Cardiovascular Disease                               | fibrosis                         | fibrosis of atrioventricular node              | 2.12E-02 | BMPR1A | 1 |
| Organismal Injury and Abnormalities                  | fibrosis                         | fibrosis of perivascular cuff                  | 2.12E-02 | AGT    | 1 |
| Cardiovascular Disease                               | fibrosis                         | fibrosis of perivascular cuff                  | 2.12E-02 | AGT    | 1 |
| Cellular Assembly and Organization                   | formation                        | formation of Weibel-Palade bodies              | 2.12E-02 | VWF    | 1 |
| Organismal Development                               | formation                        | formation of cardiac crescent                  | 2.12E-02 | BMPR1A | 1 |
| Tissue Development                                   | formation                        | formation of cardiac crescent                  | 2.12E-02 | BMPR1A | 1 |
| Embryonic Development                                | formation                        | formation of cardiac crescent                  | 2.12E-02 | BMPR1A | 1 |
| Small Molecule Biochemistry                          | formation                        | formation of cytarabine                        | 2.12E-02 | CBS    | 1 |
| Drug Metabolism                                      | formation                        | formation of cytarabine                        | 2.12E-02 | CBS    | 1 |
| Nucleic Acid Metabolism                              | formation                        | formation of cytarabine                        | 2.12E-02 | CBS    | 1 |
| Renal and Urological System Development and Function | formation                        | formation of mesangial matrix                  | 2.12E-02 | AGT    | 1 |

|                                     |                                     |                                          |          |        |   |
|-------------------------------------|-------------------------------------|------------------------------------------|----------|--------|---|
| Cellular Assembly and Organization  | formation                           | formation of neurofilaments              | 2.12E-02 | HSPB1  | 1 |
| Cellular Function and Maintenance   | formation                           | formation of neurofilaments              | 2.12E-02 | HSPB1  | 1 |
| Tissue Development                  | formation                           | formation of neurofilaments              | 2.12E-02 | HSPB1  | 1 |
| Cellular Assembly and Organization  | formation                           | formation of rosettes                    | 2.12E-02 | TXN    | 1 |
| Embryonic Development               | frequency                           | frequency of hemangioblasts              | 2.12E-02 | ENG    | 1 |
| Cellular Function and Maintenance   | function                            | function of fibroblast-like synoviocytes | 2.12E-02 | TXN    | 1 |
| Small Molecule Biochemistry         | generation                          | generation of hydrogen sulfide           | 2.12E-02 | CBS    | 1 |
| Hereditary Disorder                 | gluthathione synthetase deficiency  | gluthathione synthetase deficiency       | 2.12E-02 | GSS    | 1 |
| Metabolic Disease                   | gluthathione synthetase deficiency  | gluthathione synthetase deficiency       | 2.12E-02 | GSS    | 1 |
| Immunological Disease               | gluthathione synthetase deficiency  | gluthathione synthetase deficiency       | 2.12E-02 | GSS    | 1 |
| Organismal Injury and Abnormalities | hereditary mixed polyposis syndrome | hereditary mixed polyposis syndrome      | 2.12E-02 | BMPR1A | 1 |
| Cancer                              | hereditary mixed polyposis syndrome | hereditary mixed polyposis syndrome      | 2.12E-02 | BMPR1A | 1 |
| Gastrointestinal Disease            | hereditary mixed polyposis syndrome | hereditary mixed polyposis syndrome      | 2.12E-02 | BMPR1A | 1 |
| Small Molecule Biochemistry         | homeostasis                         | homeostasis of bile salt                 | 2.12E-02 | NR1H3  | 1 |
| Vitamin and Mineral Metabolism      | homeostasis                         | homeostasis of bile salt                 | 2.12E-02 | NR1H3  | 1 |
| Lipid Metabolism                    | homeostasis                         | homeostasis of bile salt                 | 2.12E-02 | NR1H3  | 1 |
| Small Molecule Biochemistry         | hydrolysis                          | hydrolysis of inositol phospholipid      | 2.12E-02 | AGT    | 1 |
| Lipid Metabolism                    | hydrolysis                          | hydrolysis of inositol phospholipid      | 2.12E-02 | AGT    | 1 |
| Cardiovascular Disease              | hypertension                        | hypertension of heart                    | 2.12E-02 | AGT    | 1 |
| Cardiovascular Disease              | hypertension                        | hypertension of renal glomerulus         | 2.12E-02 | AGT    | 1 |
| Renal and Urological                | hypertension                        | hypertension of renal glomerulus         | 2.12E-02 | AGT    | 1 |

|                                               |              |                                            |          |        |   |
|-----------------------------------------------|--------------|--------------------------------------------|----------|--------|---|
| Disease                                       |              |                                            |          |        |   |
| Cardiovascular Disease                        | hypertrophy  | hypertrophy of carotid artery              | 2.12E-02 | AGT    | 1 |
| Developmental Disorder                        | hypertrophy  | hypertrophy of carotid artery              | 2.12E-02 | AGT    | 1 |
| Developmental Disorder                        | hypertrophy  | hypertrophy of podocytes                   | 2.12E-02 | AGT    | 1 |
| Renal and Urological Disease                  | hypertrophy  | hypertrophy of podocytes                   | 2.12E-02 | AGT    | 1 |
| Developmental Disorder                        | hypertrophy  | hypertrophy of proximal tubule cells       | 2.12E-02 | AGT    | 1 |
| Renal and Urological Disease                  | hypertrophy  | hypertrophy of proximal tubule cells       | 2.12E-02 | AGT    | 1 |
| Cardiovascular Disease                        | hypertrophy  | hypertrophy of thoracic aorta              | 2.12E-02 | AGT    | 1 |
| Developmental Disorder                        | hypertrophy  | hypertrophy of thoracic aorta              | 2.12E-02 | AGT    | 1 |
| Cardiovascular Disease                        | hypertrophy  | hypertrophy of tunica media                | 2.12E-02 | ANGPT2 | 1 |
| Developmental Disorder                        | hypertrophy  | hypertrophy of tunica media                | 2.12E-02 | ANGPT2 | 1 |
| Developmental Disorder                        | hypertrophy  | hypertrophy of vascular tissue             | 2.12E-02 | AGT    | 1 |
| Developmental Disorder                        | hypertrophy  | hypertrophy of ventral prostatic lobe      | 2.12E-02 | NR1H3  | 1 |
| Reproductive System Disease                   | hypertrophy  | hypertrophy of ventral prostatic lobe      | 2.12E-02 | NR1H3  | 1 |
| Developmental Disorder                        | hypotrophy   | hypotrophy of adipocytes                   | 2.12E-02 | AGT    | 1 |
| Connective Tissue Disorders                   | hypotrophy   | hypotrophy of adipocytes                   | 2.12E-02 | AGT    | 1 |
| Cancer                                        | induction    | induction of papilloma                     | 2.12E-02 | ENG    | 1 |
| Tumor Morphology                              | induction    | induction of papilloma                     | 2.12E-02 | ENG    | 1 |
| Cellular Movement                             | infiltration | infiltration by multinucleated giant cells | 2.12E-02 | PPT2   | 1 |
| Hematological System Development and Function | infiltration | infiltration by multinucleated giant cells | 2.12E-02 | PPT2   | 1 |
| Immune Cell Trafficking                       | infiltration | infiltration by multinucleated giant cells | 2.12E-02 | PPT2   | 1 |
| Inflammatory Response                         | infiltration | infiltration by multinucleated giant cells | 2.12E-02 | PPT2   | 1 |
| Inflammatory                                  | inflammation | inflammation of                            | 2.12E-02 | AGT    | 1 |

|                                                       |                                       |                                              |          |         |   |
|-------------------------------------------------------|---------------------------------------|----------------------------------------------|----------|---------|---|
| Response                                              |                                       | myocardium                                   |          |         |   |
| Tissue Development                                    | inflammation                          | inflammation of myocardium                   | 2.12E-02 | AGT     | 1 |
| Inflammatory Response                                 | inflammation                          | inflammation of perivascular matrix          | 2.12E-02 | ANGPT2  | 1 |
| Cell-To-Cell Signaling and Interaction                | inflammation                          | inflammation of vascular smooth muscle cells | 2.12E-02 | AGT     | 1 |
| Inflammatory Response                                 | inflammation                          | inflammation of vascular smooth muscle cells | 2.12E-02 | AGT     | 1 |
| Skeletal and Muscular System Development and Function | S phase                               | initiation of S phase of smooth muscle cells | 2.12E-02 | AGT     | 1 |
| Cell Cycle                                            | S phase                               | initiation of S phase of smooth muscle cells | 2.12E-02 | AGT     | 1 |
| Cellular Compromise                                   | injury                                | injury of dopaminergic neurons               | 2.12E-02 | ANGPT2  | 1 |
| Cell-To-Cell Signaling and Interaction                | injury                                | injury of dopaminergic neurons               | 2.12E-02 | ANGPT2  | 1 |
| Organismal Injury and Abnormalities                   | injury                                | injury of retina                             | 2.12E-02 | TXN     | 1 |
| Ophthalmic Disease                                    | injury                                | injury of retina                             | 2.12E-02 | TXN     | 1 |
| Cellular Compromise                                   | injury                                | injury of tubules                            | 2.12E-02 | AGT     | 1 |
| Cardiovascular Disease                                | instability                           | instability of vasculature                   | 2.12E-02 | ANGPT2  | 1 |
| Molecular Transport                                   | internalization                       | internalization of water                     | 2.12E-02 | AGT     | 1 |
| Cellular Movement                                     | invasion                              | invasion of prostate cells                   | 2.12E-02 | ENG     | 1 |
| Cardiovascular Disease                                | left ventricular noncompaction type 5 | left ventricular noncompaction type 5        | 2.12E-02 | MYH7    | 1 |
| Cell-To-Cell Signaling and Interaction                | long term depression                  | long term depression of dentate gyrus        | 2.12E-02 | PRKAR1A | 1 |
| Nervous System Development and Function               | long term depression                  | long term depression of dentate gyrus        | 2.12E-02 | PRKAR1A | 1 |
| Cell Death and Survival                               | loss                                  | loss of hilar interneurons                   | 2.12E-02 | GRIK2   | 1 |
| Nervous System Development and Function               | loss                                  | loss of hilar interneurons                   | 2.12E-02 | GRIK2   | 1 |

|                                                       |             |                                                   |          |        |   |
|-------------------------------------------------------|-------------|---------------------------------------------------|----------|--------|---|
| Cell Death and Survival                               | loss        | loss of pericytes                                 | 2.12E-02 | ANGPT2 | 1 |
| Cellular Assembly and Organization                    | maintenance | maintenance of mitochondria                       | 2.12E-02 | TXN    | 1 |
| Cellular Function and Maintenance                     | maintenance | maintenance of mitochondria                       | 2.12E-02 | TXN    | 1 |
| Cellular Assembly and Organization                    | maintenance | maintenance of mitochondrial cristae              | 2.12E-02 | TXN    | 1 |
| Cellular Function and Maintenance                     | maintenance | maintenance of mitochondrial cristae              | 2.12E-02 | TXN    | 1 |
| Cellular Assembly and Organization                    | maintenance | maintenance of myofibrils                         | 2.12E-02 | TXN    | 1 |
| Cellular Function and Maintenance                     | maintenance | maintenance of myofibrils                         | 2.12E-02 | TXN    | 1 |
| Skeletal and Muscular System Development and Function | maintenance | maintenance of myofibrils                         | 2.12E-02 | TXN    | 1 |
| Cellular Assembly and Organization                    | maintenance | maintenance of sarcoplasmic reticulum             | 2.12E-02 | TXN    | 1 |
| Cellular Function and Maintenance                     | maintenance | maintenance of sarcoplasmic reticulum             | 2.12E-02 | TXN    | 1 |
| Skeletal and Muscular System Development and Function | maintenance | maintenance of sarcoplasmic reticulum             | 2.12E-02 | TXN    | 1 |
| Small Molecule Biochemistry                           | metabolism  | metabolism of 12(S)-hydroxyeicosate traenoic acid | 2.12E-02 | GPX4   | 1 |
| Lipid Metabolism                                      | metabolism  | metabolism of 12(S)-hydroxyeicosate traenoic acid | 2.12E-02 | GPX4   | 1 |
| Nervous System Development and Function               | migration   | migration of projection neurons                   | 2.12E-02 | ANGPT2 | 1 |
| Cellular Movement                                     | migration   | migration of projection neurons                   | 2.12E-02 | ANGPT2 | 1 |
| Cellular Movement                                     | migration   | migration of prostate cells                       | 2.12E-02 | ENG    | 1 |
| Reproductive System                                   | migration   | migration of prostate cells                       | 2.12E-02 | ENG    | 1 |

|                                                       |               |                                             |          |        |   |
|-------------------------------------------------------|---------------|---------------------------------------------|----------|--------|---|
| Development and Function                              |               |                                             |          |        |   |
| Cancer                                                | mitogenesis   | mitogenesis of liver cancer cells           | 2.12E-02 | AGT    | 1 |
| Cell Cycle                                            | mitogenesis   | mitogenesis of liver cancer cells           | 2.12E-02 | AGT    | 1 |
| Tumor Morphology                                      | mitogenesis   | mitogenesis of liver cancer cells           | 2.12E-02 | AGT    | 1 |
| Cell Cycle                                            | mitogenesis   | mitogenesis of testicular cancer cell lines | 2.12E-02 | DBI    | 1 |
| Endocrine System Development and Function             | mitosis       | mitosis of adrenocortical cells             | 2.12E-02 | AGT    | 1 |
| Cell Cycle                                            | mitosis       | mitosis of adrenocortical cells             | 2.12E-02 | AGT    | 1 |
| Cell Cycle                                            | mitosis       | mitosis of hepatic stellate cells           | 2.12E-02 | AGT    | 1 |
| Small Molecule Biochemistry                           | modulation    | modulation of Ca2+                          | 2.12E-02 | AGT    | 1 |
| Cell Signaling                                        | modulation    | modulation of Ca2+                          | 2.12E-02 | AGT    | 1 |
| Vitamin and Mineral Metabolism                        | modulation    | modulation of Ca2+                          | 2.12E-02 | AGT    | 1 |
| Organ Morphology                                      | morphogenesis | morphogenesis of embryonic skull vault      | 2.12E-02 | TULP3  | 1 |
| Skeletal and Muscular System Development and Function | morphogenesis | morphogenesis of embryonic skull vault      | 2.12E-02 | TULP3  | 1 |
| Organismal Development                                | morphogenesis | morphogenesis of embryonic skull vault      | 2.12E-02 | TULP3  | 1 |
| Organ Development                                     | morphogenesis | morphogenesis of embryonic skull vault      | 2.12E-02 | TULP3  | 1 |
| Tissue Development                                    | morphogenesis | morphogenesis of embryonic skull vault      | 2.12E-02 | TULP3  | 1 |
| Embryonic Development                                 | morphogenesis | morphogenesis of embryonic skull vault      | 2.12E-02 | TULP3  | 1 |
| Connective Tissue Development and Function            | morphogenesis | morphogenesis of embryonic skull vault      | 2.12E-02 | TULP3  | 1 |
| Tissue Morphology                                     | morphology    | morphology of apical processes              | 2.12E-02 | DPYSL4 | 1 |
| Nervous                                               | morphology    | morphology of                               | 2.12E-02 | DPYSL4 | 1 |

|                                         |                                                   |                                                   |          |         |   |
|-----------------------------------------|---------------------------------------------------|---------------------------------------------------|----------|---------|---|
| System Development and Function         |                                                   | apical processes                                  |          |         |   |
| Cell Morphology                         | morphology                                        | morphology of apical processes                    | 2.12E-02 | DPYSL4  | 1 |
| Cell Death and Survival                 | necrosis                                          | necrosis of left ventricle                        | 2.12E-02 | AGT     | 1 |
| Organismal Injury and Abnormalities     | neurodegeneration                                 | neurodegeneration of brainstem                    | 2.12E-02 | ATXN1   | 1 |
| Neurological Disease                    | neurodegeneration                                 | neurodegeneration of brainstem                    | 2.12E-02 | ATXN1   | 1 |
| Organismal Injury and Abnormalities     | non-Herlitz type junctional epidermolysis bullosa | non-Herlitz type junctional epidermolysis bullosa | 2.12E-02 | LAMB3   | 1 |
| Developmental Disorder                  | non-Herlitz type junctional epidermolysis bullosa | non-Herlitz type junctional epidermolysis bullosa | 2.12E-02 | LAMB3   | 1 |
| Hereditary Disorder                     | non-Herlitz type junctional epidermolysis bullosa | non-Herlitz type junctional epidermolysis bullosa | 2.12E-02 | LAMB3   | 1 |
| Connective Tissue Disorders             | non-Herlitz type junctional epidermolysis bullosa | non-Herlitz type junctional epidermolysis bullosa | 2.12E-02 | LAMB3   | 1 |
| Dermatological Diseases and Conditions  | non-Herlitz type junctional epidermolysis bullosa | non-Herlitz type junctional epidermolysis bullosa | 2.12E-02 | LAMB3   | 1 |
| Organ Morphology                        | organization                                      | organization of cerebellum                        | 2.12E-02 | HSPA5   | 1 |
| Nervous System Development and Function | organization                                      | organization of cerebellum                        | 2.12E-02 | HSPA5   | 1 |
| Cellular Compromise                     | oxidative stress response                         | oxidative stress response of kidney               | 2.12E-02 | AGT     | 1 |
| Cell-To-Cell Signaling and Interaction  | paired-pulse facilitation                         | paired-pulse facilitation of mossy fiber cells    | 2.12E-02 | GRIK2   | 1 |
| Nervous System Development and Function | paired-pulse facilitation                         | paired-pulse facilitation of mossy fiber cells    | 2.12E-02 | GRIK2   | 1 |
| Cellular Function and Maintenance       | paired-pulse facilitation                         | paired-pulse facilitation of mossy fiber cells    | 2.12E-02 | GRIK2   | 1 |
| Endocrine System Disorders              | parathyroid hyperplasia                           | parathyroid hyperplasia                           | 2.12E-02 | PRKAR1A | 1 |
| Cancer                                  | parathyroid                                       | parathyroid                                       | 2.12E-02 | PRKAR1A | 1 |

|                                                |                                                         |                                                         |          |        |   |
|------------------------------------------------|---------------------------------------------------------|---------------------------------------------------------|----------|--------|---|
|                                                | hyperplasia                                             | hyperplasia                                             |          |        |   |
| Digestive System Development and Function      | peristalsis                                             | peristalsis of intestine                                | 2.12E-02 | AGT    | 1 |
| Cellular Function and Maintenance              | permeability                                            | permeability of podocytes                               | 2.12E-02 | ANGPT2 | 1 |
| Cell Morphology                                | permeability                                            | permeability of podocytes                               | 2.12E-02 | ANGPT2 | 1 |
| Cell Cycle                                     | premature senescence                                    | premature senescence of prostate cancer cell lines      | 2.12E-02 | RRAD   | 1 |
| Cell Cycle                                     | premature senescence                                    | premature senescence of stomach cancer cell lines       | 2.12E-02 | RRAD   | 1 |
| Cardiovascular System Development and Function | pressure                                                | pressure of vasculature                                 | 2.12E-02 | AGT    | 1 |
| Endocrine System Disorders                     | primary pigmented nodular adrenocortical disease type 3 | primary pigmented nodular adrenocortical disease type 3 | 2.12E-02 | PDE8B  | 1 |
| Cellular Development                           | proliferation                                           | proliferation of adrenal glomerulosa cells              | 2.12E-02 | ANGPT2 | 1 |
| Cellular Growth and Proliferation              | proliferation                                           | proliferation of adrenal glomerulosa cells              | 2.12E-02 | ANGPT2 | 1 |
| Endocrine System Development and Function      | proliferation                                           | proliferation of adrenal glomerulosa cells              | 2.12E-02 | ANGPT2 | 1 |
| Cellular Development                           | proliferation                                           | proliferation of cytotrophoblastic cells                | 2.12E-02 | AGT    | 1 |
| Cellular Growth and Proliferation              | proliferation                                           | proliferation of cytotrophoblastic cells                | 2.12E-02 | AGT    | 1 |
| Embryonic Development                          | proliferation                                           | proliferation of cytotrophoblastic cells                | 2.12E-02 | AGT    | 1 |
| Cellular Development                           | proliferation                                           | proliferation of myeloblasts                            | 2.12E-02 | LGALS3 | 1 |
| Cellular Growth and Proliferation              | proliferation                                           | proliferation of myeloblasts                            | 2.12E-02 | LGALS3 | 1 |
| Hematological System                           | proliferation                                           | proliferation of myeloblasts                            | 2.12E-02 | LGALS3 | 1 |

|                                                       |                                                                  |                                                                  |          |        |   |
|-------------------------------------------------------|------------------------------------------------------------------|------------------------------------------------------------------|----------|--------|---|
| Development and Function                              |                                                                  |                                                                  |          |        |   |
| Hematopoiesis                                         | proliferation                                                    | proliferation of myeloblasts                                     | 2.12E-02 | LGALS3 | 1 |
| Lymphoid Tissue Structure and Development             | proliferation                                                    | proliferation of myeloblasts                                     | 2.12E-02 | LGALS3 | 1 |
| Cardiovascular System Development and Function        | proliferation                                                    | proliferation of myocardium                                      | 2.12E-02 | BMPR1A | 1 |
| Skeletal and Muscular System Development and Function | proliferation                                                    | proliferation of myocardium                                      | 2.12E-02 | BMPR1A | 1 |
| Organ Development                                     | proliferation                                                    | proliferation of myocardium                                      | 2.12E-02 | BMPR1A | 1 |
| Tissue Development                                    | proliferation                                                    | proliferation of myocardium                                      | 2.12E-02 | BMPR1A | 1 |
| Cellular Development                                  | proliferation                                                    | proliferation of myoid cells                                     | 2.12E-02 | AGT    | 1 |
| Cellular Growth and Proliferation                     | proliferation                                                    | proliferation of myoid cells                                     | 2.12E-02 | AGT    | 1 |
| Skeletal and Muscular System Development and Function | proliferation                                                    | proliferation of myoid cells                                     | 2.12E-02 | AGT    | 1 |
| Reproductive System Development and Function          | proliferation                                                    | proliferation of myoid cells                                     | 2.12E-02 | AGT    | 1 |
| Cellular Development                                  | proliferation                                                    | proliferation of neural tube cells                               | 2.12E-02 | BMPR1A | 1 |
| Cellular Growth and Proliferation                     | proliferation                                                    | proliferation of neural tube cells                               | 2.12E-02 | BMPR1A | 1 |
| Nervous System Development and Function               | proliferation                                                    | proliferation of neural tube cells                               | 2.12E-02 | BMPR1A | 1 |
| Embryonic Development                                 | proliferation                                                    | proliferation of neural tube cells                               | 2.12E-02 | BMPR1A | 1 |
| Cardiovascular Disease                                | pseudoaneurysm                                                   | pseudoaneurysm                                                   | 2.12E-02 | AGT    | 1 |
| Developmental Disorder                                | pyridoxine non-responsive cystathionine beta-synthase deficiency | pyridoxine non-responsive cystathionine beta-synthase deficiency | 2.12E-02 | CBS    | 1 |
| Hereditary Disorder                                   | pyridoxine non-responsive                                        | pyridoxine non-responsive                                        | 2.12E-02 | CBS    | 1 |

|                                                |                                                                  |                                                                  |          |        |   |
|------------------------------------------------|------------------------------------------------------------------|------------------------------------------------------------------|----------|--------|---|
|                                                | cystathionine beta-synthase deficiency                           | cystathionine beta-synthase deficiency                           |          |        |   |
| Metabolic Disease                              | pyridoxine non-responsive cystathionine beta-synthase deficiency | pyridoxine non-responsive cystathionine beta-synthase deficiency | 2.12E-02 | CBS    | 1 |
| Tissue Morphology                              | quantity                                                         | quantity of adrenocortical cells                                 | 2.12E-02 | ANGPT2 | 1 |
| Endocrine System Development and Function      | quantity                                                         | quantity of adrenocortical cells                                 | 2.12E-02 | ANGPT2 | 1 |
| Cardiovascular System Development and Function | quantity                                                         | quantity of adventitial fibroblasts                              | 2.12E-02 | ANGPT2 | 1 |
| Tissue Morphology                              | quantity                                                         | quantity of adventitial fibroblasts                              | 2.12E-02 | ANGPT2 | 1 |
| Connective Tissue Development and Function     | quantity                                                         | quantity of adventitial fibroblasts                              | 2.12E-02 | ANGPT2 | 1 |
| Cardiovascular System Development and Function | quantity                                                         | quantity of atrioventricular node                                | 2.12E-02 | BMPR1A | 1 |
| Tissue Morphology                              | quantity                                                         | quantity of fenestra                                             | 2.12E-02 | ANGPT2 | 1 |
| Small Molecule Biochemistry                    | quantity                                                         | quantity of inositol phosphate                                   | 2.12E-02 | AGT    | 1 |
| Molecular Transport                            | quantity                                                         | quantity of inositol phosphate                                   | 2.12E-02 | AGT    | 1 |
| Carbohydrate Metabolism                        | quantity                                                         | quantity of inositol phosphate                                   | 2.12E-02 | AGT    | 1 |
| Organ Morphology                               | quantity                                                         | quantity of mammary duct                                         | 2.12E-02 | NCOA6  | 1 |
| Reproductive System Development and Function   | quantity                                                         | quantity of mammary duct                                         | 2.12E-02 | NCOA6  | 1 |
| Cellular Assembly and Organization             | quantity                                                         | quantity of nuclear inclusions                                   | 2.12E-02 | ATXN1  | 1 |
| Small Molecule Biochemistry                    | quantity                                                         | quantity of taurine                                              | 2.12E-02 | ATXN1  | 1 |
| Molecular Transport                            | quantity                                                         | quantity of taurine                                              | 2.12E-02 | ATXN1  | 1 |
| Amino Acid                                     | quantity                                                         | quantity of                                                      | 2.12E-02 | ATXN1  | 1 |

|                                                       |              |                                                 |          |      |   |
|-------------------------------------------------------|--------------|-------------------------------------------------|----------|------|---|
| Metabolism                                            |              | taurine                                         |          |      |   |
| Small Molecule Biochemistry                           | quantity     | quantity of very long chain fatty acid          | 2.12E-02 | DBI  | 1 |
| Molecular Transport                                   | quantity     | quantity of very long chain fatty acid          | 2.12E-02 | DBI  | 1 |
| Lipid Metabolism                                      | quantity     | quantity of very long chain fatty acid          | 2.12E-02 | DBI  | 1 |
| Cell-To-Cell Signaling and Interaction                | recognition  | recognition of neurons                          | 2.12E-02 | NTM  | 1 |
| Nervous System Development and Function               | recognition  | recognition of neurons                          | 2.12E-02 | NTM  | 1 |
| Small Molecule Biochemistry                           | reduction    | reduction of palmitoyl-coenzyme A               | 2.12E-02 | FAR1 | 1 |
| Lipid Metabolism                                      | reduction    | reduction of palmitoyl-coenzyme A               | 2.12E-02 | FAR1 | 1 |
| Nucleic Acid Metabolism                               | reduction    | reduction of palmitoyl-coenzyme A               | 2.12E-02 | FAR1 | 1 |
| Tissue Morphology                                     | regeneration | regeneration of sciatic nerve                   | 2.12E-02 | AGT  | 1 |
| Nervous System Development and Function               | regeneration | regeneration of sciatic nerve                   | 2.12E-02 | AGT  | 1 |
| Tissue Development                                    | regeneration | regeneration of sciatic nerve                   | 2.12E-02 | AGT  | 1 |
| Organ Morphology                                      | regeneration | regeneration of skeletal muscle satellite cells | 2.12E-02 | BVES | 1 |
| Cell Death and Survival                               | regeneration | regeneration of skeletal muscle satellite cells | 2.12E-02 | BVES | 1 |
| Cellular Development                                  | regeneration | regeneration of skeletal muscle satellite cells | 2.12E-02 | BVES | 1 |
| Skeletal and Muscular System Development and Function | regeneration | regeneration of skeletal muscle satellite cells | 2.12E-02 | BVES | 1 |
| Tissue Development                                    | regeneration | regeneration of skeletal muscle satellite cells | 2.12E-02 | BVES | 1 |
| Organ Morphology                                      | relaxation   | relaxation of anococcygeus smooth muscle        | 2.12E-02 | AGT  | 1 |
| Skeletal and                                          | relaxation   | relaxation of                                   | 2.12E-02 | AGT  | 1 |

|                                                      |            |                                               |          |        |   |
|------------------------------------------------------|------------|-----------------------------------------------|----------|--------|---|
| Muscular System Development and Function             |            | anococcygeus smooth muscle                    |          |        |   |
| Cardiovascular System Development and Function       | relaxation | relaxation of renal artery                    | 2.12E-02 | AGT    | 1 |
| Organ Morphology                                     | relaxation | relaxation of renal artery                    | 2.12E-02 | AGT    | 1 |
| Tissue Morphology                                    | relaxation | relaxation of renal artery                    | 2.12E-02 | AGT    | 1 |
| Renal and Urological System Development and Function | relaxation | relaxation of renal artery                    | 2.12E-02 | AGT    | 1 |
| Small Molecule Biochemistry                          | release    | release of 20-hydroxyeicosate traenoic acid   | 2.12E-02 | AGT    | 1 |
| Molecular Transport                                  | release    | release of 20-hydroxyeicosate traenoic acid   | 2.12E-02 | AGT    | 1 |
| Lipid Metabolism                                     | release    | release of 20-hydroxyeicosate traenoic acid   | 2.12E-02 | AGT    | 1 |
| Small Molecule Biochemistry                          | release    | release of inositol phosphate                 | 2.12E-02 | AGT    | 1 |
| Molecular Transport                                  | release    | release of inositol phosphate                 | 2.12E-02 | AGT    | 1 |
| Carbohydrate Metabolism                              | release    | release of inositol phosphate                 | 2.12E-02 | AGT    | 1 |
| Small Molecule Biochemistry                          | release    | release of phosphatidylinositol polyphosphate | 2.12E-02 | AGT    | 1 |
| Molecular Transport                                  | release    | release of phosphatidylinositol polyphosphate | 2.12E-02 | AGT    | 1 |
| Lipid Metabolism                                     | release    | release of phosphatidylinositol polyphosphate | 2.12E-02 | AGT    | 1 |
| Carbohydrate Metabolism                              | release    | release of phosphatidylinositol polyphosphate | 2.12E-02 | AGT    | 1 |
| Tissue Morphology                                    | remodeling | remodeling of aorta                           | 2.12E-02 | AGT    | 1 |
| Tissue Morphology                                    | remodeling | remodeling of basal lamina                    | 2.12E-02 | ANGPT2 | 1 |

|                                                      |                                    |                                            |          |        |   |
|------------------------------------------------------|------------------------------------|--------------------------------------------|----------|--------|---|
| Cardiovascular System Development and Function       | remodeling                         | remodeling of vascular endothelial tissue  | 2.12E-02 | ENG    | 1 |
| Tissue Morphology                                    | remodeling                         | remodeling of vascular endothelial tissue  | 2.12E-02 | ENG    | 1 |
| Free Radical Scavenging                              | removal                            | removal of hydrogen peroxide               | 2.12E-02 | TXN    | 1 |
| Cardiovascular System Development and Function       | response                           | response of aortic ring tissue             | 2.12E-02 | AGT    | 1 |
| Tissue Development                                   | response                           | response of aortic ring tissue             | 2.12E-02 | AGT    | 1 |
| Cell-To-Cell Signaling and Interaction               | responsiveness                     | responsiveness of Purkinje cells           | 2.12E-02 | ATXN1  | 1 |
| Cellular Compromise                                  | retraction                         | retraction of mesangial cells              | 2.12E-02 | AGT    | 1 |
| Renal and Urological System Development and Function | retraction                         | retraction of mesangial cells              | 2.12E-02 | AGT    | 1 |
| Cardiovascular Disease                               | rupture                            | rupture of abdominal aorta                 | 2.12E-02 | AGT    | 1 |
| Organ Morphology                                     | scaling                            | scaling of skin                            | 2.12E-02 | DBI    | 1 |
| Hair and Skin Development and Function               | scaling                            | scaling of skin                            | 2.12E-02 | DBI    | 1 |
| Skeletal and Muscular Disorders                      | scapuloperoneal muscular dystrophy | scapuloperoneal muscular dystrophy         | 2.12E-02 | MYH7   | 1 |
| Hereditary Disorder                                  | scapuloperoneal muscular dystrophy | scapuloperoneal muscular dystrophy         | 2.12E-02 | MYH7   | 1 |
| Cell Cycle                                           | senescence                         | senescence of vascular smooth muscle cells | 2.12E-02 | AGT    | 1 |
| Cardiovascular System Development and Function       | shape                              | shape of endothelial cells                 | 2.12E-02 | CAPN1  | 1 |
| Cell Morphology                                      | shape                              | shape of endothelial cells                 | 2.12E-02 | CAPN1  | 1 |
| Organismal Injury and Abnormalities                  | size                               | size of thrombus                           | 2.12E-02 | VWF    | 1 |
| Cardiovascular Disease                               | size                               | size of thrombus                           | 2.12E-02 | VWF    | 1 |
| Hair and Skin                                        | skin turgor                        | skin turgor                                | 2.12E-02 | KIFAP3 | 1 |

|                                                       |                                           |                                           |          |        |   |
|-------------------------------------------------------|-------------------------------------------|-------------------------------------------|----------|--------|---|
| Development and Function                              |                                           |                                           |          |        |   |
| Cancer                                                | spindle cell-type squamous cell carcinoma | spindle cell-type squamous cell carcinoma | 2.12E-02 | ENG    | 1 |
| Cell-To-Cell Signaling and Interaction                | stimulation                               | stimulation of adrenal glomerulosa cells  | 2.12E-02 | ANGPT2 | 1 |
| Cellular Growth and Proliferation                     | stimulation                               | stimulation of adrenal glomerulosa cells  | 2.12E-02 | ANGPT2 | 1 |
| Cell-To-Cell Signaling and Interaction                | stimulation                               | stimulation of myofibroblasts             | 2.12E-02 | LGALS3 | 1 |
| Cellular Growth and Proliferation                     | stimulation                               | stimulation of myofibroblasts             | 2.12E-02 | LGALS3 | 1 |
| Skeletal and Muscular System Development and Function | stimulation                               | stimulation of myofibroblasts             | 2.12E-02 | LGALS3 | 1 |
| Cell-To-Cell Signaling and Interaction                | stimulation                               | stimulation of pericytes                  | 2.12E-02 | LGALS3 | 1 |
| Cellular Growth and Proliferation                     | stimulation                               | stimulation of pericytes                  | 2.12E-02 | LGALS3 | 1 |
| Connective Tissue Development and Function            | stimulation                               | stimulation of pericytes                  | 2.12E-02 | LGALS3 | 1 |
| Cardiovascular System Development and Function        | structural integrity                      | structural integrity of blood vessel      | 2.12E-02 | ANGPT2 | 1 |
| Tissue Morphology                                     | structural integrity                      | structural integrity of blood vessel      | 2.12E-02 | ANGPT2 | 1 |
| Cellular Assembly and Organization                    | structural integrity                      | structural integrity of mitochondria      | 2.12E-02 | LGALS3 | 1 |
| Cell Morphology                                       | structural integrity                      | structural integrity of mitochondria      | 2.12E-02 | LGALS3 | 1 |
| Cell Morphology                                       | surface area                              | surface area of mesangial cells           | 2.12E-02 | AGT    | 1 |
| Renal and Urological System Development and Function  | surface area                              | surface area of mesangial cells           | 2.12E-02 | AGT    | 1 |
| Cell Death and                                        | survival                                  | survival of                               | 2.12E-02 | RCAN1  | 1 |

|                                                |                                  |                                                   |          |        |   |
|------------------------------------------------|----------------------------------|---------------------------------------------------|----------|--------|---|
| Survival                                       |                                  | neuronal progenitor cells                         |          |        |   |
| Nervous System Development and Function        | survival                         | survival of neuronal progenitor cells             | 2.12E-02 | RCAN1  | 1 |
| Small Molecule Biochemistry                    | synthesis                        | synthesis of L-cysteine                           | 2.12E-02 | CBS    | 1 |
| Amino Acid Metabolism                          | synthesis                        | synthesis of L-cysteine                           | 2.12E-02 | CBS    | 1 |
| Small Molecule Biochemistry                    | synthesis                        | synthesis of wax ester                            | 2.12E-02 | FAR1   | 1 |
| Lipid Metabolism                               | synthesis                        | synthesis of wax ester                            | 2.12E-02 | FAR1   | 1 |
| Tissue Morphology                              | thickening                       | thickening of adventitia                          | 2.12E-02 | AGT    | 1 |
| Tissue Morphology                              | thickening                       | thickening of endothelial tissue                  | 2.12E-02 | ENG    | 1 |
| Tissue Morphology                              | thickening                       | thickening of interstitial tissue                 | 2.12E-02 | TXN    | 1 |
| Cardiovascular Disease                         | thickening                       | thickening of neointima                           | 2.12E-02 | AGT    | 1 |
| Post-Translational Modification                | thiolation                       | thiolation of protein                             | 2.12E-02 | GPX4   | 1 |
| Cardiovascular Disease                         | thrombosis                       | thrombosis of vascular tissue                     | 2.12E-02 | VWF    | 1 |
| Hematological Disease                          | thrombosis                       | thrombosis of vascular tissue                     | 2.12E-02 | VWF    | 1 |
| Developmental Disorder                         | treacher collins syndrome type 2 | treacher collins syndrome type 2                  | 2.12E-02 | POLR1D | 1 |
| Skeletal and Muscular Disorders                | treacher collins syndrome type 2 | treacher collins syndrome type 2                  | 2.12E-02 | POLR1D | 1 |
| Hereditary Disorder                            | treacher collins syndrome type 2 | treacher collins syndrome type 2                  | 2.12E-02 | POLR1D | 1 |
| Connective Tissue Disorders                    | treacher collins syndrome type 2 | treacher collins syndrome type 2                  | 2.12E-02 | POLR1D | 1 |
| Small Molecule Biochemistry                    | uptake                           | uptake of ADP                                     | 2.12E-02 | ATXN1  | 1 |
| Molecular Transport                            | uptake                           | uptake of ADP                                     | 2.12E-02 | ATXN1  | 1 |
| Nucleic Acid Metabolism                        | uptake                           | uptake of ADP                                     | 2.12E-02 | ATXN1  | 1 |
| Cellular Compromise                            | vacuolation                      | vacuolation of brain cells                        | 2.12E-02 | ATXN1  | 1 |
| Cell Morphology                                | vacuolation                      | vacuolation of brain cells                        | 2.12E-02 | ATXN1  | 1 |
| Cardiovascular System Development and Function | vasoconstriction                 | vasoconstriction of efferent glomerular arteriole | 2.12E-02 | AGT    | 1 |
| Cardiovascular                                 | vasoconstriction                 | vasoconstriction                                  | 2.12E-02 | AGT    | 1 |

|                                                       |                                        |                                        |          |              |   |
|-------------------------------------------------------|----------------------------------------|----------------------------------------|----------|--------------|---|
| System Development and Function                       |                                        | of mesenteric arteriolar ring          |          |              |   |
| Cardiovascular System Development and Function        | vasodilation                           | vasodilation of cerebellum             | 2.12E-02 | CBS          | 1 |
| Tissue Morphology                                     | vasodilation                           | vasodilation of cerebellum             | 2.12E-02 | CBS          | 1 |
| Organismal Development                                | vasodilation                           | vasodilation of cerebellum             | 2.12E-02 | CBS          | 1 |
| Tissue Morphology                                     | volume                                 | volume of vascular smooth muscle cells | 2.12E-02 | ANGPT2       | 1 |
| Skeletal and Muscular System Development and Function | volume                                 | volume of vascular smooth muscle cells | 2.12E-02 | ANGPT2       | 1 |
| Cell Morphology                                       | volume                                 | volume of vascular smooth muscle cells | 2.12E-02 | ANGPT2       | 1 |
| Hereditary Disorder                                   | von Willebrand disease type 2A/IIE     | von Willebrand disease type 2A/IIE     | 2.12E-02 | VWF          | 1 |
| Hematological Disease                                 | von Willebrand disease type 2A/IIE     | von Willebrand disease type 2A/IIE     | 2.12E-02 | VWF          | 1 |
| Hereditary Disorder                                   | von Willebrand disease type 3          | von Willebrand disease type 3          | 2.12E-02 | VWF          | 1 |
| Hematological Disease                                 | von Willebrand disease type 3          | von Willebrand disease type 3          | 2.12E-02 | VWF          | 1 |
| Hereditary Disorder                                   | von Willebrand's disease type 2B       | von Willebrand's disease type 2B       | 2.12E-02 | VWF          | 1 |
| Hematological Disease                                 | von Willebrand's disease type 2B       | von Willebrand's disease type 2B       | 2.12E-02 | VWF          | 1 |
| Hereditary Disorder                                   | von Willebrand's disease type 2N       | von Willebrand's disease type 2N       | 2.12E-02 | VWF          | 1 |
| Hematological Disease                                 | von Willebrand's disease type 2N       | von Willebrand's disease type 2N       | 2.12E-02 | VWF          | 1 |
| Hereditary Disorder                                   | von Willebrand's disease type I        | von Willebrand's disease type I        | 2.12E-02 | VWF          | 1 |
| Hematological Disease                                 | von Willebrand's disease type I        | von Willebrand's disease type I        | 2.12E-02 | VWF          | 1 |
| Hereditary Disorder                                   | von Willebrand's disease, Vicenza type | von Willebrand's disease, Vicenza type | 2.12E-02 | VWF          | 1 |
| Hematological Disease                                 | von Willebrand's disease, Vicenza type | von Willebrand's disease, Vicenza type | 2.12E-02 | VWF          | 1 |
| Organ Morphology                                      | abnormal morphology                    | abnormal morphology of Sertoli cells   | 2.16E-02 | DNAJA1,NR1H3 | 2 |
| Tissue Morphology                                     | abnormal morphology                    | abnormal morphology of                 | 2.16E-02 | DNAJA1,NR1H3 | 2 |

|                                              |                                              |                                              |          |               |   |
|----------------------------------------------|----------------------------------------------|----------------------------------------------|----------|---------------|---|
|                                              |                                              | Sertoli cells                                |          |               |   |
| Cell Morphology                              | abnormal morphology                          | abnormal morphology of Sertoli cells         | 2.16E-02 | DNAJA1,NR1H3  | 2 |
| Reproductive System Development and Function | abnormal morphology                          | abnormal morphology of Sertoli cells         | 2.16E-02 | DNAJA1,NR1H3  | 2 |
| Connective Tissue Development and Function   | abnormal morphology                          | abnormal morphology of Sertoli cells         | 2.16E-02 | DNAJA1,NR1H3  | 2 |
| Cancer                                       | autosomal dominant polycystic kidney disease | autosomal dominant polycystic kidney disease | 2.16E-02 | AGT,ANGPT2    | 2 |
| Developmental Disorder                       | autosomal dominant polycystic kidney disease | autosomal dominant polycystic kidney disease | 2.16E-02 | AGT,ANGPT2    | 2 |
| Renal and Urological Disease                 | autosomal dominant polycystic kidney disease | autosomal dominant polycystic kidney disease | 2.16E-02 | AGT,ANGPT2    | 2 |
| Hereditary Disorder                          | autosomal dominant polycystic kidney disease | autosomal dominant polycystic kidney disease | 2.16E-02 | AGT,ANGPT2    | 2 |
| Cell Cycle                                   | mitogenesis                                  | mitogenesis of connective tissue cells       | 2.16E-02 | AGT,TXN       | 2 |
| Post-Translational Modification              | refolding                                    | refolding of protein                         | 2.16E-02 | DNAJA1,DNAJA4 | 2 |
| Protein Folding                              | refolding                                    | refolding of protein                         | 2.16E-02 | DNAJA1,DNAJA4 | 2 |
| Small Molecule Biochemistry                  | secretion                                    | secretion of aldosterone                     | 2.16E-02 | AGT,ANGPT2    | 2 |
| Endocrine System Development and Function    | secretion                                    | secretion of aldosterone                     | 2.16E-02 | AGT,ANGPT2    | 2 |
| Molecular Transport                          | secretion                                    | secretion of aldosterone                     | 2.16E-02 | AGT,ANGPT2    | 2 |
| Lipid Metabolism                             | secretion                                    | secretion of aldosterone                     | 2.16E-02 | AGT,ANGPT2    | 2 |
| Small Molecule Biochemistry                  | synthesis                                    | synthesis of aldosterone                     | 2.16E-02 | AGT,ANGPT2    | 2 |
| Endocrine System Development and Function    | synthesis                                    | synthesis of aldosterone                     | 2.16E-02 | AGT,ANGPT2    | 2 |
| Vitamin and Mineral Metabolism               | synthesis                                    | synthesis of aldosterone                     | 2.16E-02 | AGT,ANGPT2    | 2 |

|                                                       |                |                           |          |                                      |   |
|-------------------------------------------------------|----------------|---------------------------|----------|--------------------------------------|---|
| Lipid Metabolism                                      | synthesis      | synthesis of aldosterone  | 2.16E-02 | AGT,ANGPT2                           | 2 |
| Organ Morphology                                      | volume         | volume of trabecular bone | 2.16E-02 | BMPR1A,CAPN1                         | 2 |
| Skeletal and Muscular System Development and Function | volume         | volume of trabecular bone | 2.16E-02 | BMPR1A,CAPN1                         | 2 |
| Tissue Morphology                                     | quantity       | quantity of muscle cells  | 2.21E-02 | AGT,ANGPT2,ENG,RCAN1                 | 4 |
| Skeletal and Muscular System Development and Function | quantity       | quantity of muscle cells  | 2.21E-02 | AGT,ANGPT2,ENG,RCAN1                 | 4 |
| Small Molecule Biochemistry                           | synthesis      | synthesis of steroid      | 2.29E-02 | AGT,ANGPT2,DBI, NR1H3,PDE8B          | 5 |
| Vitamin and Mineral Metabolism                        | synthesis      | synthesis of steroid      | 2.29E-02 | AGT,ANGPT2,DBI, NR1H3,PDE8B          | 5 |
| Lipid Metabolism                                      | synthesis      | synthesis of steroid      | 2.29E-02 | AGT,ANGPT2,DBI, NR1H3,PDE8B          | 5 |
| Cell-To-Cell Signaling and Interaction                | recruitment    | recruitment of leukocytes | 2.32E-02 | AGT,ANGPT2,LGALS3,RIPK2,TXN,VWF      | 6 |
| Cellular Movement                                     | recruitment    | recruitment of leukocytes | 2.32E-02 | AGT,ANGPT2,LGALS3,RIPK2,TXN,VWF      | 6 |
| Hematological System Development and Function         | recruitment    | recruitment of leukocytes | 2.32E-02 | AGT,ANGPT2,LGALS3,RIPK2,TXN,VWF      | 6 |
| Immune Cell Trafficking                               | recruitment    | recruitment of leukocytes | 2.32E-02 | AGT,ANGPT2,LGALS3,RIPK2,TXN,VWF      | 6 |
| Cellular Function and Maintenance                     | autophagy      | autophagy of cells        | 2.41E-02 | AGT,ATG2A,CAPN1 ,GJA4,HSPA5,TME M173 | 6 |
| Cell Morphology                                       | autophagy      | autophagy of cells        | 2.41E-02 | AGT,ATG2A,CAPN1 ,GJA4,HSPA5,TME M173 | 6 |
| Cell Morphology                                       | morphology     | morphology of macrophages | 2.47E-02 | LGALS3,MANBA,N R1H3                  | 3 |
| Hematological System Development and Function         | morphology     | morphology of macrophages | 2.47E-02 | LGALS3,MANBA,N R1H3                  | 3 |
| Inflammatory Response                                 | morphology     | morphology of macrophages | 2.47E-02 | LGALS3,MANBA,N R1H3                  | 3 |
| Nervous System Development and Function               | spatial memory | spatial memory            | 2.47E-02 | ATXN1,PRKAR1A,RCAN1                  | 3 |
| Behavior                                              | spatial memory | spatial memory            | 2.47E-02 | ATXN1,PRKAR1A,RCAN1                  | 3 |
| Cardiovascular                                        | adhesion       | adhesion of               | 2.55E-02 | ANGPT2,CDH13                         | 2 |

|                                                |                       |                                         |          |                           |   |
|------------------------------------------------|-----------------------|-----------------------------------------|----------|---------------------------|---|
| System Development and Function                |                       | endothelial cell lines                  |          |                           |   |
| Cell-To-Cell Signaling and Interaction         | adhesion              | adhesion of endothelial cell lines      | 2.55E-02 | ANGPT2,CDH13              | 2 |
| Tissue Development                             | adhesion              | adhesion of endothelial cell lines      | 2.55E-02 | ANGPT2,CDH13              | 2 |
| Molecular Transport                            | excretion             | excretion of Na+                        | 2.55E-02 | AGT,ANGPT2                | 2 |
| Cellular Function and Maintenance              | function              | function of blood platelets             | 2.55E-02 | CAPN1,VWF                 | 2 |
| Hematological System Development and Function  | function              | function of blood platelets             | 2.55E-02 | CAPN1,VWF                 | 2 |
| Organismal Injury and Abnormalities            | interstitial fibrosis | interstitial fibrosis of heart          | 2.55E-02 | AGT,ANGPT2                | 2 |
| Cardiovascular Disease                         | interstitial fibrosis | interstitial fibrosis of heart          | 2.55E-02 | AGT,ANGPT2                | 2 |
| Metabolic Disease                              | iron overload         | iron overload                           | 2.55E-02 | BMPR1A,CBS                | 2 |
| Hematological Disease                          | iron overload         | iron overload                           | 2.55E-02 | BMPR1A,CBS                | 2 |
| Nutritional Disease                            | iron overload         | iron overload                           | 2.55E-02 | BMPR1A,CBS                | 2 |
| Cardiovascular System Development and Function | permeability          | permeability of blood vessel            | 2.55E-02 | ANGPT2,VWF                | 2 |
| Tissue Morphology                              | permeability          | permeability of blood vessel            | 2.55E-02 | ANGPT2,VWF                | 2 |
| Cardiovascular System Development and Function | survival              | survival of vascular endothelial cells  | 2.55E-02 | ANGPT2,CDH13              | 2 |
| Cell Death and Survival                        | survival              | survival of vascular endothelial cells  | 2.55E-02 | ANGPT2,CDH13              | 2 |
| Small Molecule Biochemistry                    | concentration         | concentration of glutathione            | 2.70E-02 | AGT,CBS,TXN               | 3 |
| Drug Metabolism                                | concentration         | concentration of glutathione            | 2.70E-02 | AGT,CBS,TXN               | 3 |
| Molecular Transport                            | concentration         | concentration of glutathione            | 2.70E-02 | AGT,CBS,TXN               | 3 |
| Cellular Movement                              | migration             | migration of prostate cancer cell lines | 2.70E-02 | LAMB3,LGALS3,NE S         | 3 |
| Organ Morphology                               | abnormal morphology   | abnormal morphology of liver            | 2.78E-02 | CBS,NCOA6,NR1H3,PEX5,PPT2 | 5 |
| Digestive                                      | abnormal              | abnormal                                | 2.78E-02 | CBS,NCOA6,NR1H            | 5 |

|                                                |                        |                                                    |          |                                                       |    |
|------------------------------------------------|------------------------|----------------------------------------------------|----------|-------------------------------------------------------|----|
| System Development and Function                | morphology             | morphology of liver                                |          | 3,PEX5,PPT2                                           |    |
| Hepatic System Development and Function        | abnormal morphology    | abnormal morphology of liver                       | 2.78E-02 | CBS,NCOA6,NR1H3,PEX5,PPT2                             | 5  |
| Organ Morphology                               | morphology             | morphology of liver                                | 2.83E-02 | CBS,MANBA,NCOA6,NR1H3,PEX5,PPT2                       | 6  |
| Digestive System Development and Function      | morphology             | morphology of liver                                | 2.83E-02 | CBS,MANBA,NCOA6,NR1H3,PEX5,PPT2                       | 6  |
| Hepatic System Development and Function        | morphology             | morphology of liver                                | 2.83E-02 | CBS,MANBA,NCOA6,NR1H3,PEX5,PPT2                       | 6  |
| Reproductive System Development and Function   | fertility              | fertility                                          | 2.91E-02 | AGT,DNAJA1,GPX4,NCOA6,NR1H3,PRKAR1A,RCAN1             | 7  |
| Cardiovascular System Development and Function | adhesion               | adhesion of vascular endothelial cells             | 2.93E-02 | ANGPT2,LGALS3,RCAN1                                   | 3  |
| Cell-To-Cell Signaling and Interaction         | adhesion               | adhesion of vascular endothelial cells             | 2.93E-02 | ANGPT2,LGALS3,RCAN1                                   | 3  |
| Tissue Development                             | adhesion               | adhesion of vascular endothelial cells             | 2.93E-02 | ANGPT2,LGALS3,RCAN1                                   | 3  |
| Nucleic Acid Metabolism                        | metabolism             | metabolism of nucleic acid component or derivative | 2.96E-02 | ADCY6,AGT,AK4,ANGPT2,ATXN1,CBS,DBI,MYH7,NUDT2,RHOBTB3 | 10 |
| Gastrointestinal Disease                       | Barrett's syndrome     | Barrett's syndrome                                 | 2.98E-02 | ENG,GSS                                               | 2  |
| Inflammatory Disease                           | Barrett's syndrome     | Barrett's syndrome                                 | 2.98E-02 | ENG,GSS                                               | 2  |
| Organismal Injury and Abnormalities            | area                   | area of atherosclerotic lesion                     | 2.98E-02 | AGT,CBS                                               | 2  |
| Tissue Morphology                              | area                   | area of atherosclerotic lesion                     | 2.98E-02 | AGT,CBS                                               | 2  |
| Cardiovascular Disease                         | area                   | area of atherosclerotic lesion                     | 2.98E-02 | AGT,CBS                                               | 2  |
| Free Radical Scavenging                        | catabolism             | catabolism of hydrogen peroxide                    | 2.98E-02 | GPX4,TXN                                              | 2  |
| Small Molecule Biochemistry                    | catabolism             | catabolism of hydrogen peroxide                    | 2.98E-02 | GPX4,TXN                                              | 2  |
| Cell Cycle                                     | cell cycle progression | cell cycle progression of                          | 2.98E-02 | PRKCH,ZNF655                                          | 2  |

|                                                |                           |                                    |          |                                                                 |   |
|------------------------------------------------|---------------------------|------------------------------------|----------|-----------------------------------------------------------------|---|
|                                                |                           | leukemia cell lines                |          |                                                                 |   |
| Cellular Movement                              | chemotaxis                | chemotaxis of leukocyte cell lines | 2.98E-02 | AGT, TXN                                                        | 2 |
| Hematological System Development and Function  | chemotaxis                | chemotaxis of leukocyte cell lines | 2.98E-02 | AGT, TXN                                                        | 2 |
| Immune Cell Trafficking                        | chemotaxis                | chemotaxis of leukocyte cell lines | 2.98E-02 | AGT, TXN                                                        | 2 |
| Endocrine System Disorders                     | polycystic ovary syndrome | polycystic ovary syndrome          | 2.98E-02 | BMPR1A, PRKAR1A                                                 | 2 |
| Cancer                                         | polycystic ovary syndrome | polycystic ovary syndrome          | 2.98E-02 | BMPR1A, PRKAR1A                                                 | 2 |
| Reproductive System Disease                    | polycystic ovary syndrome | polycystic ovary syndrome          | 2.98E-02 | BMPR1A, PRKAR1A                                                 | 2 |
| Cardiovascular System Development and Function | relaxation                | relaxation of artery               | 2.98E-02 | AGT, CBS                                                        | 2 |
| Tissue Morphology                              | relaxation                | relaxation of artery               | 2.98E-02 | AGT, CBS                                                        | 2 |
| Cardiovascular System Development and Function | size                      | size of blood vessel               | 2.98E-02 | AGT, CBS                                                        | 2 |
| Tissue Morphology                              | size                      | size of blood vessel               | 2.98E-02 | AGT, CBS                                                        | 2 |
| Organismal Development                         | size                      | size of blood vessel               | 2.98E-02 | AGT, CBS                                                        | 2 |
| Cardiovascular System Development and Function | adhesion                  | adhesion of endothelial cells      | 3.00E-02 | ANGPT2, LGALS3, R CAN1, TXN                                     | 4 |
| Cell-To-Cell Signaling and Interaction         | adhesion                  | adhesion of endothelial cells      | 3.00E-02 | ANGPT2, LGALS3, R CAN1, TXN                                     | 4 |
| Tissue Development                             | adhesion                  | adhesion of endothelial cells      | 3.00E-02 | ANGPT2, LGALS3, R CAN1, TXN                                     | 4 |
| Cellular Assembly and Organization             | formation                 | formation of filaments             | 3.02E-02 | AGT, CAPN1, CDC42 BPB, HSPA5, HSPB1, INPP5A, KANK2, MYH7, PRKCH | 9 |
| Tissue Development                             | formation                 | formation of filaments             | 3.02E-02 | AGT, CAPN1, CDC42 BPB, HSPA5, HSPB1, INPP5A, KANK2, MYH7, PRKCH | 9 |
| Cell-To-Cell Signaling and Interaction         | recruitment               | recruitment of phagocytes          | 3.05E-02 | AGT, ANGPT2, LGALS3, RIPK2, VWF                                 | 5 |
| Cellular                                       | recruitment               | recruitment of                     | 3.05E-02 | AGT, ANGPT2, LGALS3, RIPK2, VWF                                 | 5 |

|                                                |                     |                                    |          |                                                      |    |
|------------------------------------------------|---------------------|------------------------------------|----------|------------------------------------------------------|----|
| Movement                                       |                     | phagocytes                         |          | S3,RIPK2,VWF                                         |    |
| Hematological System Development and Function  | recruitment         | recruitment of phagocytes          | 3.05E-02 | AGT,ANGPT2,LGALS3,RIPK2,VWF                          | 5  |
| Immune Cell Trafficking                        | recruitment         | recruitment of phagocytes          | 3.05E-02 | AGT,ANGPT2,LGALS3,RIPK2,VWF                          | 5  |
| Inflammatory Response                          | recruitment         | recruitment of phagocytes          | 3.05E-02 | AGT,ANGPT2,LGALS3,RIPK2,VWF                          | 5  |
| Organismal Injury and Abnormalities            | formation           | formation of vascular lesion       | 3.18E-02 | AGT,ANGPT2,CBS                                       | 3  |
| Cardiovascular Disease                         | formation           | formation of vascular lesion       | 3.18E-02 | AGT,ANGPT2,CBS                                       | 3  |
| Cell-To-Cell Signaling and Interaction         | recruitment         | recruitment of neutrophils         | 3.18E-02 | AGT,LGALS3,RIPK2,VWF                                 | 4  |
| Cellular Movement                              | recruitment         | recruitment of neutrophils         | 3.18E-02 | AGT,LGALS3,RIPK2,VWF                                 | 4  |
| Hematological System Development and Function  | recruitment         | recruitment of neutrophils         | 3.18E-02 | AGT,LGALS3,RIPK2,VWF                                 | 4  |
| Immune Cell Trafficking                        | recruitment         | recruitment of neutrophils         | 3.18E-02 | AGT,LGALS3,RIPK2,VWF                                 | 4  |
| Inflammatory Response                          | recruitment         | recruitment of neutrophils         | 3.18E-02 | AGT,LGALS3,RIPK2,VWF                                 | 4  |
| Cardiovascular System Development and Function | cell movement       | cell movement of endothelial cells | 3.21E-02 | AGT,ANGPT2,CDH13,ENG,HSPA5,HSBP1,LGALS3              | 7  |
| Cellular Movement                              | cell movement       | cell movement of endothelial cells | 3.21E-02 | AGT,ANGPT2,CDH13,ENG,HSPA5,HSBP1,LGALS3              | 7  |
| Cancer                                         | prostate cancer     | prostate cancer                    | 3.26E-02 | ATXN1,BMP1A,CDH13,CHGB,ENG,FHL2,GJA4,NES,PRKCH,TUBB6 | 10 |
| Reproductive System Disease                    | prostate cancer     | prostate cancer                    | 3.26E-02 | ATXN1,BMP1A,CDH13,CHGB,ENG,FHL2,GJA4,NES,PRKCH,TUBB6 | 10 |
| Organ Morphology                               | abnormal morphology | abnormal morphology of cerebrum    | 3.43E-02 | MANBA,NR1H3                                          | 2  |
| Nervous System Development and Function        | abnormal morphology | abnormal morphology of cerebrum    | 3.43E-02 | MANBA,NR1H3                                          | 2  |
| Tissue Morphology                              | abnormal morphology | abnormal morphology of spinal cord | 3.43E-02 | KIFAP3,MANBA                                         | 2  |
| Nervous System Development                     | abnormal morphology | abnormal morphology of spinal cord | 3.43E-02 | KIFAP3,MANBA                                         | 2  |

|                                                      |                     |                                      |          |                        |   |
|------------------------------------------------------|---------------------|--------------------------------------|----------|------------------------|---|
| and Function                                         |                     |                                      |          |                        |   |
| Cell Morphology                                      | cell flattening     | cell flattening                      | 3.43E-02 | PRKCH,RRAD             | 2 |
| Cellular Movement                                    | cell movement       | cell movement of sperm               | 3.43E-02 | CSNK2A2,DNAJA1         | 2 |
| Reproductive System Development and Function         | cell movement       | cell movement of sperm               | 3.43E-02 | CSNK2A2,DNAJA1         | 2 |
| Cellular Development                                 | proliferation       | proliferation of mesangial cells     | 3.43E-02 | AGT,ANGPT2             | 2 |
| Cellular Growth and Proliferation                    | proliferation       | proliferation of mesangial cells     | 3.43E-02 | AGT,ANGPT2             | 2 |
| Renal and Urological System Development and Function | proliferation       | proliferation of mesangial cells     | 3.43E-02 | AGT,ANGPT2             | 2 |
| Molecular Transport                                  | quantity            | quantity of Na+                      | 3.43E-02 | ADCY6,AGT              | 2 |
| Reproductive System Disease                          | oligozoospermia     | oligozoospermia                      | 3.43E-02 | CSNK2A2,DNAJA1, TARBP2 | 3 |
| Cardiovascular Disease                               | thrombosis          | Thrombosis                           | 3.55E-02 | ANGPT2,CAPN1,GRIK2,VWF | 4 |
| Hematological Disease                                | thrombosis          | Thrombosis                           | 3.55E-02 | ANGPT2,CAPN1,GRIK2,VWF | 4 |
| Organ Morphology                                     | abnormal morphology | abnormal morphology of gland         | 3.55E-02 | CBS,DNAJA1,NCOA6,PPT2  | 4 |
| Cell Death and Survival                              | apoptosis           | apoptosis of male germ cells         | 3.70E-02 | CSNK2A2,GPX4,NR1H3     | 3 |
| Cell-To-Cell Signaling and Interaction               | activation          | activation of hepatic stellate cells | 3.90E-02 | AGT,LGALS3             | 2 |
| Hepatic System Development and Function              | activation          | activation of hepatic stellate cells | 3.90E-02 | AGT,LGALS3             | 2 |
| Connective Tissue Development and Function           | activation          | activation of hepatic stellate cells | 3.90E-02 | AGT,LGALS3             | 2 |
| Cellular Movement                                    | chemotaxis          | chemotaxis of fibroblasts            | 3.90E-02 | AGT,ANGPT2             | 2 |
| Connective Tissue Development and Function           | chemotaxis          | chemotaxis of fibroblasts            | 3.90E-02 | AGT,ANGPT2             | 2 |
| Small Molecule Biochemistry                          | concentration       | concentration of aldosterone         | 3.90E-02 | AGT,ANGPT2             | 2 |
| Endocrine System Development and Function            | concentration       | concentration of aldosterone         | 3.90E-02 | AGT,ANGPT2             | 2 |

|                                               |                       |                                           |          |                                                       |   |
|-----------------------------------------------|-----------------------|-------------------------------------------|----------|-------------------------------------------------------|---|
| Molecular Transport                           | concentration         | concentration of aldosterone              | 3.90E-02 | AGT,ANGPT2                                            | 2 |
| Lipid Metabolism                              | concentration         | concentration of aldosterone              | 3.90E-02 | AGT,ANGPT2                                            | 2 |
| Cellular Assembly and Organization            | duplication           | duplication of centrosome                 | 3.90E-02 | BRSK1,STK38                                           | 2 |
| Cellular Function and Maintenance             | duplication           | duplication of centrosome                 | 3.90E-02 | BRSK1,STK38                                           | 2 |
| Cell Cycle                                    | duplication           | duplication of centrosome                 | 3.90E-02 | BRSK1,STK38                                           | 2 |
| DNA Replication, Recombination, and Repair    | duplication           | duplication of centrosome                 | 3.90E-02 | BRSK1,STK38                                           | 2 |
| Cellular Function and Maintenance             | function              | function of Th1 cells                     | 3.90E-02 | RCAN1,RIPK2                                           | 2 |
| Hematological System Development and Function | function              | function of Th1 cells                     | 3.90E-02 | RCAN1,RIPK2                                           | 2 |
| Cancer                                        | endocrine gland tumor | endocrine gland tumor                     | 3.91E-02 | ANGPT2,BMP1A, DPYSL4,ENG,LAM B3,LGALS3,PRKAR 1A,PTPN4 | 8 |
| Cell-To-Cell Signaling and Interaction        | attachment            | attachment of cells                       | 3.94E-02 | CDH13,ENG,LGALS 3,VWF                                 | 4 |
| Tissue Development                            | attachment            | attachment of cells                       | 3.94E-02 | CDH13,ENG,LGALS 3,VWF                                 | 4 |
| Cell Death and Survival                       | cell death            | cell death of pheochromocytoma cell lines | 3.94E-02 | AGT,ANGPT2,HSP B1,SERPINI1                            | 4 |
| Cell-To-Cell Signaling and Interaction        | adhesion              | adhesion of granulocytes                  | 3.97E-02 | ANGPT2,LGALS3,T XN                                    | 3 |
| Hematological System Development and Function | adhesion              | adhesion of granulocytes                  | 3.97E-02 | ANGPT2,LGALS3,T XN                                    | 3 |
| Immune Cell Trafficking                       | adhesion              | adhesion of granulocytes                  | 3.97E-02 | ANGPT2,LGALS3,T XN                                    | 3 |
| Tissue Development                            | adhesion              | adhesion of granulocytes                  | 3.97E-02 | ANGPT2,LGALS3,T XN                                    | 3 |
| Organismal Development                        | development           | development of placenta                   | 3.97E-02 | ENG,NCOA6,VWF                                         | 3 |
| Organ Development                             | development           | development of placenta                   | 3.97E-02 | ENG,NCOA6,VWF                                         | 3 |
| Reproductive System Development and Function  | development           | development of placenta                   | 3.97E-02 | ENG,NCOA6,VWF                                         | 3 |
| Tissue                                        | development           | development of                            | 3.97E-02 | ENG,NCOA6,VWF                                         | 3 |

|                                         |                                                                  |                                                                  |          |                                                              |    |
|-----------------------------------------|------------------------------------------------------------------|------------------------------------------------------------------|----------|--------------------------------------------------------------|----|
| Development                             |                                                                  | placenta                                                         |          |                                                              |    |
| Embryonic Development                   | development                                                      | development of placenta                                          | 3.97E-02 | ENG,NCOA6,VWF                                                | 3  |
| Neurological Disease                    | hyperactive behavior                                             | hyperactive behavior                                             | 3.97E-02 | AGT,LCLAT1,RCAN1                                             | 3  |
| Psychological Disorders                 | hyperactive behavior                                             | hyperactive behavior                                             | 3.97E-02 | AGT,LCLAT1,RCAN1                                             | 3  |
| Tissue Morphology                       | quantity                                                         | quantity of brain cells                                          | 3.97E-02 | ATXN1,BMPR1A,NES                                             | 3  |
| Nervous System Development and Function | quantity                                                         | quantity of brain cells                                          | 3.97E-02 | ATXN1,BMPR1A,NES                                             | 3  |
| Small Molecule Biochemistry             | synthesis                                                        | synthesis of lipid                                               | 3.99E-02 | AGT,ANGPT2,DBI,DHRS9,FAR1,GPX4,LTA4H,NR1H3,PDE8B,ST8SIA5,TXN | 11 |
| Lipid Metabolism                        | synthesis                                                        | synthesis of lipid                                               | 3.99E-02 | AGT,ANGPT2,DBI,DHRS9,FAR1,GPX4,LTA4H,NR1H3,PDE8B,ST8SIA5,TXN | 11 |
| Cardiovascular Disease                  | hypertrophy                                                      | hypertrophy of heart                                             | 4.12E-02 | AGT,ANGPT2,FHL2,RCAN1,TXN                                    | 5  |
| Developmental Disorder                  | hypertrophy                                                      | hypertrophy of heart                                             | 4.12E-02 | AGT,ANGPT2,FHL2,RCAN1,TXN                                    | 5  |
| Cell Death and Survival                 | apoptosis                                                        | apoptosis of parenchymal cells                                   | 4.15E-02 | CBS,HSPA5,NCOA6,TXN                                          | 4  |
| Cellular Function and Maintenance       | autophagy                                                        | autophagy of tumor cell lines                                    | 4.15E-02 | ATG2A,CAPN1,GJA4,HSPA5                                       | 4  |
| Cell Morphology                         | autophagy                                                        | autophagy of tumor cell lines                                    | 4.15E-02 | ATG2A,CAPN1,GJA4,HSPA5                                       | 4  |
| Cancer                                  | Carney complex type 1                                            | Carney complex type 1                                            | 4.19E-02 | PRKAR1A                                                      | 1  |
| Cardiovascular Disease                  | Carney complex type 1                                            | Carney complex type 1                                            | 4.19E-02 | PRKAR1A                                                      | 1  |
| Hereditary Disorder                     | Carney complex type 1                                            | Carney complex type 1                                            | 4.19E-02 | PRKAR1A                                                      | 1  |
| Dermatological Diseases and Conditions  | Carney complex type 1                                            | Carney complex type 1                                            | 4.19E-02 | PRKAR1A                                                      | 1  |
| Cell Signaling                          | G-protein signaling, coupled to cGMP nucleotide second messenger | G-protein signaling, coupled to cGMP nucleotide second messenger | 4.19E-02 | AGT                                                          | 1  |
| Cancer                                  | PTEN hamartoma tumor syndrome                                    | PTEN hamartoma tumor syndrome                                    | 4.19E-02 | BMPR1A                                                       | 1  |
| Hereditary Disorder                     | PTEN hamartoma tumor syndrome                                    | PTEN hamartoma tumor syndrome                                    | 4.19E-02 | BMPR1A                                                       | 1  |

|                                           |                     |                                                     |          |       |   |
|-------------------------------------------|---------------------|-----------------------------------------------------|----------|-------|---|
| Organ Morphology                          | abnormal morphology | abnormal morphology of axillary lymph node          | 4.19E-02 | PRKCH | 1 |
| Tissue Morphology                         | abnormal morphology | abnormal morphology of axillary lymph node          | 4.19E-02 | PRKCH | 1 |
| Lymphoid Tissue Structure and Development | abnormal morphology | abnormal morphology of axillary lymph node          | 4.19E-02 | PRKCH | 1 |
| Tissue Morphology                         | abnormal morphology | abnormal morphology of cortical subplate            | 4.19E-02 | BRSK1 | 1 |
| Organ Morphology                          | abnormal morphology | abnormal morphology of enlarged cervical lymph node | 4.19E-02 | PRKCH | 1 |
| Tissue Morphology                         | abnormal morphology | abnormal morphology of enlarged cervical lymph node | 4.19E-02 | PRKCH | 1 |
| Lymphoid Tissue Structure and Development | abnormal morphology | abnormal morphology of enlarged cervical lymph node | 4.19E-02 | PRKCH | 1 |
| Organ Morphology                          | abnormal morphology | abnormal morphology of enlarged inguinal lymph node | 4.19E-02 | PRKCH | 1 |
| Tissue Morphology                         | abnormal morphology | abnormal morphology of enlarged inguinal lymph node | 4.19E-02 | PRKCH | 1 |
| Lymphoid Tissue Structure and Development | abnormal morphology | abnormal morphology of enlarged inguinal lymph node | 4.19E-02 | PRKCH | 1 |
| Organ Morphology                          | abnormal morphology | abnormal morphology of enlarged sebaceous glands    | 4.19E-02 | CBS   | 1 |
| Tissue Morphology                         | abnormal morphology | abnormal morphology of epididymal epithelium        | 4.19E-02 | MANBA | 1 |
| Organ                                     | abnormal            | abnormal                                            | 4.19E-02 | AGT   | 1 |

|                                                      |                     |                                                  |          |        |   |
|------------------------------------------------------|---------------------|--------------------------------------------------|----------|--------|---|
| Morphology                                           | morphology          | morphology of juxtaglomerular apparatus          |          |        |   |
| Renal and Urological System Development and Function | abnormal morphology | abnormal morphology of juxtaglomerular apparatus | 4.19E-02 | AGT    | 1 |
| Tissue Morphology                                    | abnormal morphology | abnormal morphology of medulla oblongata         | 4.19E-02 | KIFAP3 | 1 |
| Nervous System Development and Function              | abnormal morphology | abnormal morphology of medulla oblongata         | 4.19E-02 | KIFAP3 | 1 |
| Organ Morphology                                     | abnormal morphology | abnormal morphology of myometrium                | 4.19E-02 | NR1H3  | 1 |
| Reproductive System Development and Function         | abnormal morphology | abnormal morphology of myometrium                | 4.19E-02 | NR1H3  | 1 |
| Organ Morphology                                     | abnormal morphology | abnormal morphology of wrinkled skin             | 4.19E-02 | CBS    | 1 |
| Cellular Assembly and Organization                   | accumulation        | accumulation of autophagosomes                   | 4.19E-02 | ATG2A  | 1 |
| Cellular Function and Maintenance                    | accumulation        | accumulation of autophagosomes                   | 4.19E-02 | ATG2A  | 1 |
| Cell Morphology                                      | accumulation        | accumulation of autophagosomes                   | 4.19E-02 | ATG2A  | 1 |
| Inflammatory Response                                | accumulation        | accumulation of autophagosomes                   | 4.19E-02 | ATG2A  | 1 |
| Hematological System Development and Function        | accumulation        | accumulation of monocyte-derived macrophages     | 4.19E-02 | CBS    | 1 |
| Immune Cell Trafficking                              | accumulation        | accumulation of monocyte-derived macrophages     | 4.19E-02 | CBS    | 1 |
| Inflammatory Response                                | accumulation        | accumulation of monocyte-derived macrophages     | 4.19E-02 | CBS    | 1 |
| Tissue Development                                   | accumulation        | accumulation of monocyte-derived macrophages     | 4.19E-02 | CBS    | 1 |
| Cardiovascular                                       | activation          | activation of                                    | 4.19E-02 | ANGPT2 | 1 |

|                                                |               |                                                   |          |        |   |
|------------------------------------------------|---------------|---------------------------------------------------|----------|--------|---|
| System Development and Function                |               | lymphatic endothelial cells                       |          |        |   |
| Cell-To-Cell Signaling and Interaction         | activation    | activation of lymphatic endothelial cells         | 4.19E-02 | ANGPT2 | 1 |
| Cell-To-Cell Signaling and Interaction         | activation    | activation of neural precursor cells              | 4.19E-02 | ANGPT2 | 1 |
| Small Molecule Biochemistry                    | activation    | activation of sterol                              | 4.19E-02 | NR1H3  | 1 |
| Lipid Metabolism                               | activation    | activation of sterol                              | 4.19E-02 | NR1H3  | 1 |
| Cell-To-Cell Signaling and Interaction         | activation    | activation of sympathetic nerve                   | 4.19E-02 | AGT    | 1 |
| Nervous System Development and Function        | activation    | activation of sympathetic nerve                   | 4.19E-02 | AGT    | 1 |
| Tissue Development                             | activation    | activation of sympathetic nerve                   | 4.19E-02 | AGT    | 1 |
| Cell-To-Cell Signaling and Interaction         | agglutination | agglutination of blood platelets                  | 4.19E-02 | VWF    | 1 |
| Hematological System Development and Function  | agglutination | agglutination of blood platelets                  | 4.19E-02 | VWF    | 1 |
| Inflammatory Response                          | agglutination | agglutination of blood platelets                  | 4.19E-02 | VWF    | 1 |
| Tissue Development                             | agglutination | agglutination of blood platelets                  | 4.19E-02 | VWF    | 1 |
| Cardiovascular System Development and Function | angiogenesis  | angiogenesis of carcinoma                         | 4.19E-02 | AGT    | 1 |
| Cancer                                         | angiogenesis  | angiogenesis of carcinoma                         | 4.19E-02 | AGT    | 1 |
| Cardiovascular System Development and Function | angiogenesis  | angiogenesis of granuloma                         | 4.19E-02 | AGT    | 1 |
| Organismal Development                         | angiogenesis  | angiogenesis of granuloma                         | 4.19E-02 | AGT    | 1 |
| Cell Death and Survival                        | apoptosis     | apoptosis of chronic lymphocytic leukemia B cells | 4.19E-02 | TXN    | 1 |
| Tumor Morphology                               | apoptosis     | apoptosis of chronic lymphocytic leukemia B cells | 4.19E-02 | TXN    | 1 |
| Cell Death and                                 | apoptosis     | apoptosis of                                      | 4.19E-02 | AGT    | 1 |

|                                                |           |                                                |          |        |   |
|------------------------------------------------|-----------|------------------------------------------------|----------|--------|---|
| Survival                                       |           | endothelial progenitor cells                   |          |        |   |
| Cell Death and Survival                        | apoptosis | apoptosis of interdigital cells                | 4.19E-02 | BMPR1A | 1 |
| Embryonic Development                          | apoptosis | apoptosis of interdigital cells                | 4.19E-02 | BMPR1A | 1 |
| Cell Death and Survival                        | apoptosis | apoptosis of lens fiber cells                  | 4.19E-02 | NCOA6  | 1 |
| Cell Death and Survival                        | apoptosis | apoptosis of skeletal muscle cells             | 4.19E-02 | AGT    | 1 |
| Cardiovascular System Development and Function | area      | area of abdominal aorta                        | 4.19E-02 | AGT    | 1 |
| Tissue Morphology                              | area      | area of abdominal aorta                        | 4.19E-02 | AGT    | 1 |
| Organismal Development                         | area      | area of abdominal aorta                        | 4.19E-02 | AGT    | 1 |
| Cardiovascular System Development and Function | area      | area of tunica media                           | 4.19E-02 | AGT    | 1 |
| Organismal Development                         | area      | area of tunica media                           | 4.19E-02 | AGT    | 1 |
| Lymphoid Tissue Structure and Development      | area      | area of tunica media                           | 4.19E-02 | AGT    | 1 |
| Cell Cycle                                     | G1 phase  | arrest in G1 phase of keratinocytes            | 4.19E-02 | PRKCH  | 1 |
| Hair and Skin Development and Function         | G1 phase  | arrest in G1 phase of keratinocytes            | 4.19E-02 | PRKCH  | 1 |
| Cellular Development                           | growth    | arrest in growth of cervical cancer cell lines | 4.19E-02 | TXN    | 1 |
| Cellular Growth and Proliferation              | growth    | arrest in growth of cervical cancer cell lines | 4.19E-02 | TXN    | 1 |
| Cardiovascular System Development and Function | growth    | arrest in growth of endothelial cells          | 4.19E-02 | ENG    | 1 |
| Cellular Development                           | growth    | arrest in growth of endothelial cells          | 4.19E-02 | ENG    | 1 |
| Cellular Growth and Proliferation              | growth    | arrest in growth of endothelial cells          | 4.19E-02 | ENG    | 1 |
| Organismal Development                         | growth    | arrest in growth of endothelial cells          | 4.19E-02 | ENG    | 1 |
| Tissue                                         | growth    | arrest in growth                               | 4.19E-02 | ENG    | 1 |

|                                                |                    |                                              |          |        |   |
|------------------------------------------------|--------------------|----------------------------------------------|----------|--------|---|
| Development                                    |                    | of endothelial cells                         |          |        |   |
| Cardiovascular Disease                         | atherosclerosis    | atherosclerosis of thoracic aorta            | 4.19E-02 | NR1H3  | 1 |
| Cell-To-Cell Signaling and Interaction         | attachment         | attachment of brain cancer cell lines        | 4.19E-02 | CDH13  | 1 |
| Tissue Development                             | attachment         | attachment of brain cancer cell lines        | 4.19E-02 | CDH13  | 1 |
| Cell-To-Cell Signaling and Interaction         | binding            | binding of adrenocortical cells              | 4.19E-02 | AGT    | 1 |
| Cell-To-Cell Signaling and Interaction         | binding            | binding of brain cancer cell lines           | 4.19E-02 | HSPA5  | 1 |
| Cell-To-Cell Signaling and Interaction         | binding            | binding of focal adhesions                   | 4.19E-02 | ANGPT2 | 1 |
| Cellular Assembly and Organization             | binding            | binding of focal adhesions                   | 4.19E-02 | ANGPT2 | 1 |
| Tissue Development                             | binding            | binding of focal adhesions                   | 4.19E-02 | ANGPT2 | 1 |
| Gene Expression                                | binding            | binding of hypoxia response element          | 4.19E-02 | AGT    | 1 |
| Small Molecule Biochemistry                    | biosynthesis       | biosynthesis of L-serine                     | 4.19E-02 | CBS    | 1 |
| Amino Acid Metabolism                          | biosynthesis       | biosynthesis of L-serine                     | 4.19E-02 | CBS    | 1 |
| Organismal Injury and Abnormalities            | bleeding           | bleeding of abdominal aorta                  | 4.19E-02 | AGT    | 1 |
| Cardiovascular Disease                         | bleeding           | bleeding of abdominal aorta                  | 4.19E-02 | AGT    | 1 |
| Endocrine System Disorders                     | bleeding           | bleeding of ovary                            | 4.19E-02 | NR1H3  | 1 |
| Organismal Injury and Abnormalities            | bleeding           | bleeding of ovary                            | 4.19E-02 | NR1H3  | 1 |
| Reproductive System Disease                    | bleeding           | bleeding of ovary                            | 4.19E-02 | NR1H3  | 1 |
| Cell Morphology                                | cell flattening    | cell flattening of neuroblastoma cell lines  | 4.19E-02 | RRAD   | 1 |
| Cardiovascular System Development and Function | cell-cell adhesion | cell-cell adhesion of endothelial cell lines | 4.19E-02 | CDH13  | 1 |
| Cell-To-Cell Signaling and                     | cell-cell adhesion | cell-cell adhesion of                        | 4.19E-02 | CDH13  | 1 |

|                                                |                           |                                                 |          |        |   |
|------------------------------------------------|---------------------------|-------------------------------------------------|----------|--------|---|
| Interaction                                    |                           | endothelial cell lines                          |          |        |   |
| Tissue Development                             | cell-cell adhesion        | cell-cell adhesion of endothelial cell lines    | 4.19E-02 | CDH13  | 1 |
| Cellular Growth and Proliferation              | colony formation          | colony formation of pheochromocytoma cell lines | 4.19E-02 | RCAN1  | 1 |
| Small Molecule Biochemistry                    | concentration             | concentration of androstenedione                | 4.19E-02 | NR1H3  | 1 |
| Endocrine System Development and Function      | concentration             | concentration of androstenedione                | 4.19E-02 | NR1H3  | 1 |
| Molecular Transport                            | concentration             | concentration of androstenedione                | 4.19E-02 | NR1H3  | 1 |
| Lipid Metabolism                               | concentration             | concentration of androstenedione                | 4.19E-02 | NR1H3  | 1 |
| Small Molecule Biochemistry                    | concentration             | concentration of dinoprost                      | 4.19E-02 | AGT    | 1 |
| Molecular Transport                            | concentration             | concentration of dinoprost                      | 4.19E-02 | AGT    | 1 |
| Lipid Metabolism                               | concentration             | concentration of dinoprost                      | 4.19E-02 | AGT    | 1 |
| Organismal Injury and Abnormalities            | congestion                | congestion of liver                             | 4.19E-02 | ENG    | 1 |
| Gastrointestinal Disease                       | congestion                | congestion of liver                             | 4.19E-02 | ENG    | 1 |
| Hepatic System Disease                         | congestion                | congestion of liver                             | 4.19E-02 | ENG    | 1 |
| Cell-To-Cell Signaling and Interaction         | contact growth inhibition | contact growth inhibition of myeloma cell lines | 4.19E-02 | BMPR1A | 1 |
| Cellular Growth and Proliferation              | contact growth inhibition | contact growth inhibition of myeloma cell lines | 4.19E-02 | BMPR1A | 1 |
| Cell Cycle                                     | contact growth inhibition | contact growth inhibition of myeloma cell lines | 4.19E-02 | BMPR1A | 1 |
| Cell Morphology                                | contractility             | contractility of vascular smooth muscle cells   | 4.19E-02 | AGT    | 1 |
| Cardiovascular System Development and Function | contraction               | contraction of aorta                            | 4.19E-02 | AGT    | 1 |
| Tissue Morphology                              | contraction               | contraction of aorta                            | 4.19E-02 | AGT    | 1 |
| Cardiovascular                                 | contraction               | contraction of                                  | 4.19E-02 | AGT    | 1 |

|                                                       |                   |                                                    |          |         |   |
|-------------------------------------------------------|-------------------|----------------------------------------------------|----------|---------|---|
| System Development and Function                       |                   | mesenteric artery                                  |          |         |   |
| Tissue Morphology                                     | contraction       | contraction of mesenteric artery                   | 4.19E-02 | AGT     | 1 |
| Skeletal and Muscular System Development and Function | contraction       | contraction of myoid cells                         | 4.19E-02 | AGT     | 1 |
| Cell Morphology                                       | contraction       | contraction of myoid cells                         | 4.19E-02 | AGT     | 1 |
| Reproductive System Development and Function          | contraction       | contraction of myoid cells                         | 4.19E-02 | AGT     | 1 |
| Cellular Development                                  | conversion        | conversion of epithelial cell lines                | 4.19E-02 | ENG     | 1 |
| Cell Morphology                                       | conversion        | conversion of epithelial cell lines                | 4.19E-02 | ENG     | 1 |
| Hair and Skin Development and Function                | conversion        | conversion of epithelial cell lines                | 4.19E-02 | ENG     | 1 |
| Post-Translational Modification                       | conversion        | conversion of homocysteine                         | 4.19E-02 | CBS     | 1 |
| Small Molecule Biochemistry                           | conversion        | conversion of homocysteine                         | 4.19E-02 | CBS     | 1 |
| Amino Acid Metabolism                                 | conversion        | conversion of homocysteine                         | 4.19E-02 | CBS     | 1 |
| Small Molecule Biochemistry                           | conversion        | conversion of leukotriene A4                       | 4.19E-02 | LTA4H   | 1 |
| Lipid Metabolism                                      | conversion        | conversion of leukotriene A4                       | 4.19E-02 | LTA4H   | 1 |
| Cellular Development                                  | conversion        | conversion of skin cell lines                      | 4.19E-02 | ENG     | 1 |
| Cell Morphology                                       | conversion        | conversion of skin cell lines                      | 4.19E-02 | ENG     | 1 |
| Hair and Skin Development and Function                | conversion        | conversion of skin cell lines                      | 4.19E-02 | ENG     | 1 |
| Developmental Disorder                                | dedifferentiation | dedifferentiation of smooth muscle cells           | 4.19E-02 | AGT     | 1 |
| Skeletal and Muscular Disorders                       | dedifferentiation | dedifferentiation of smooth muscle cells           | 4.19E-02 | AGT     | 1 |
| Cancer                                                | tumorigenesis     | delay in tumorigenesis of kidney cancer cell lines | 4.19E-02 | PRKAR1A | 1 |
| Renal and                                             | tumorigenesis     | delay in                                           | 4.19E-02 | PRKAR1A | 1 |

|                                                |             |                                             |          |        |   |
|------------------------------------------------|-------------|---------------------------------------------|----------|--------|---|
| Urological Disease                             |             | tumorigenesis of kidney cancer cell lines   |          |        |   |
| Cardiovascular System Development and Function | density     | density of artery                           | 4.19E-02 | AGT    | 1 |
| Tissue Morphology                              | density     | density of artery                           | 4.19E-02 | AGT    | 1 |
| Organismal Development                         | density     | density of artery                           | 4.19E-02 | AGT    | 1 |
| Cellular Assembly and Organization             | density     | density of axons                            | 4.19E-02 | BMPR1A | 1 |
| Cardiovascular System Development and Function | density     | density of vascular tissue                  | 4.19E-02 | RCAN1  | 1 |
| Tissue Morphology                              | density     | density of vascular tissue                  | 4.19E-02 | RCAN1  | 1 |
| Molecular Transport                            | depletion   | depletion of mitochondrial DNA              | 4.19E-02 | LCLAT1 | 1 |
| DNA Replication, Recombination, and Repair     | depletion   | depletion of mitochondrial DNA              | 4.19E-02 | LCLAT1 | 1 |
| Cell-To-Cell Signaling and Interaction         | detachment  | detachment of vascular endothelial cells    | 4.19E-02 | ENG    | 1 |
| Tissue Development                             | detachment  | detachment of vascular endothelial cells    | 4.19E-02 | ENG    | 1 |
| Organismal Development                         | development | development of fur                          | 4.19E-02 | DBI    | 1 |
| Organ Development                              | development | development of fur                          | 4.19E-02 | DBI    | 1 |
| Tissue Development                             | development | development of fur                          | 4.19E-02 | DBI    | 1 |
| Embryonic Development                          | development | development of fur                          | 4.19E-02 | DBI    | 1 |
| Hair and Skin Development and Function         | development | development of fur                          | 4.19E-02 | DBI    | 1 |
| Organismal Development                         | development | development of glomerular basement membrane | 4.19E-02 | MPV17  | 1 |
| Organ Development                              | development | development of glomerular basement membrane | 4.19E-02 | MPV17  | 1 |
| Tissue Development                             | development | development of glomerular basement          | 4.19E-02 | MPV17  | 1 |

|                                                      |                 |                                                          |          |         |   |
|------------------------------------------------------|-----------------|----------------------------------------------------------|----------|---------|---|
|                                                      |                 | membrane                                                 |          |         |   |
| Embryonic Development                                | development     | development of glomerular basement membrane              | 4.19E-02 | MPV17   | 1 |
| Renal and Urological System Development and Function | development     | development of glomerular basement membrane              | 4.19E-02 | MPV17   | 1 |
| Organismal Development                               | development     | development of labyrinthine zone of placenta             | 4.19E-02 | NCOA6   | 1 |
| Organ Development                                    | development     | development of labyrinthine zone of placenta             | 4.19E-02 | NCOA6   | 1 |
| Reproductive System Development and Function         | development     | development of labyrinthine zone of placenta             | 4.19E-02 | NCOA6   | 1 |
| Tissue Development                                   | development     | development of labyrinthine zone of placenta             | 4.19E-02 | NCOA6   | 1 |
| Embryonic Development                                | development     | development of labyrinthine zone of placenta             | 4.19E-02 | NCOA6   | 1 |
| Organismal Development                               | development     | development of lateral plate mesoderm                    | 4.19E-02 | PRKAR1A | 1 |
| Tissue Development                                   | development     | development of lateral plate mesoderm                    | 4.19E-02 | PRKAR1A | 1 |
| Embryonic Development                                | development     | development of lateral plate mesoderm                    | 4.19E-02 | PRKAR1A | 1 |
| Cardiovascular Disease                               | development     | development of thrombus                                  | 4.19E-02 | VWF     | 1 |
| Cardiovascular System Development and Function       | diameter        | diameter of abdominal aorta                              | 4.19E-02 | AGT     | 1 |
| Tissue Morphology                                    | diameter        | diameter of abdominal aorta                              | 4.19E-02 | AGT     | 1 |
| Cell Morphology                                      | diameter        | diameter of myofiber                                     | 4.19E-02 | AGT     | 1 |
| Cellular Development                                 | differentiation | differentiation of bone marrow-derived mononuclear cells | 4.19E-02 | AGT     | 1 |
| Hematological System Development and Function        | differentiation | differentiation of bone marrow-derived mononuclear cells | 4.19E-02 | AGT     | 1 |

|                                                      |                                         |                                                              |          |         |   |
|------------------------------------------------------|-----------------------------------------|--------------------------------------------------------------|----------|---------|---|
| Hematopoiesis                                        | differentiation                         | differentiation of bone marrow-derived mononuclear cells     | 4.19E-02 | AGT     | 1 |
| Developmental Disorder                               | dysplasia                               | dysplasia of mammary gland                                   | 4.19E-02 | CSNK2A2 | 1 |
| Reproductive System Disease                          | dysplasia                               | dysplasia of mammary gland                                   | 4.19E-02 | CSNK2A2 | 1 |
| Cellular Compromise                                  | endoplasmic reticulum stress response   | endoplasmic reticulum stress response of leukemia cell lines | 4.19E-02 | HSPA5   | 1 |
| Cellular Function and Maintenance                    | endoplasmic reticulum stress response   | endoplasmic reticulum stress response of leukemia cell lines | 4.19E-02 | HSPA5   | 1 |
| Immunological Disease                                | enlargement                             | enlargement of lymph vessel                                  | 4.19E-02 | AGT     | 1 |
| Nervous System Development and Function              | establishment                           | establishment of blood-brain barrier                         | 4.19E-02 | AGT     | 1 |
| Organ Morphology                                     | expansion                               | expansion of mesangium                                       | 4.19E-02 | LGALS3  | 1 |
| Organismal Development                               | expansion                               | expansion of mesangium                                       | 4.19E-02 | LGALS3  | 1 |
| Organ Development                                    | expansion                               | expansion of mesangium                                       | 4.19E-02 | LGALS3  | 1 |
| Tissue Development                                   | expansion                               | expansion of mesangium                                       | 4.19E-02 | LGALS3  | 1 |
| Embryonic Development                                | expansion                               | expansion of mesangium                                       | 4.19E-02 | LGALS3  | 1 |
| Renal and Urological System Development and Function | expansion                               | expansion of mesangium                                       | 4.19E-02 | LGALS3  | 1 |
| Organismal Injury and Abnormalities                  | experimentally-induced hepatic fibrosis | experimentally-induced hepatic fibrosis                      | 4.19E-02 | LGALS3  | 1 |
| Gastrointestinal Disease                             | experimentally-induced hepatic fibrosis | experimentally-induced hepatic fibrosis                      | 4.19E-02 | LGALS3  | 1 |
| Hepatic System Disease                               | experimentally-induced hepatic fibrosis | experimentally-induced hepatic fibrosis                      | 4.19E-02 | LGALS3  | 1 |
| Behavior                                             | eyeblink conditioning                   | eyeblink conditioning                                        | 4.19E-02 | PTPN4   | 1 |
| Organismal Injury and Abnormalities                  | fibrosis                                | fibrosis of coronary artery                                  | 4.19E-02 | AGT     | 1 |

|                                                      |                                |                                 |          |        |   |
|------------------------------------------------------|--------------------------------|---------------------------------|----------|--------|---|
| Cardiovascular Disease                               | fibrosis                       | fibrosis of coronary artery     | 4.19E-02 | AGT    | 1 |
| Organismal Injury and Abnormalities                  | fibrosis                       | fibrosis of pericytes           | 4.19E-02 | AGT    | 1 |
| Connective Tissue Disorders                          | fibrosis                       | fibrosis of pericytes           | 4.19E-02 | AGT    | 1 |
| Organismal Injury and Abnormalities                  | fibrosis                       | fibrosis of perivascular matrix | 4.19E-02 | ANGPT2 | 1 |
| Organ Development                                    | formation                      | formation of lens               | 4.19E-02 | BMPR1A | 1 |
| Visual System Development and Function               | formation                      | formation of lens               | 4.19E-02 | BMPR1A | 1 |
| Cardiovascular System Development and Function       | formation                      | formation of vascular tissue    | 4.19E-02 | ANGPT2 | 1 |
| Tissue Development                                   | formation                      | formation of vascular tissue    | 4.19E-02 | ANGPT2 | 1 |
| Cardiovascular Disease                               | fragmentation                  | fragmentation of elastic lamina | 4.19E-02 | AGT    | 1 |
| Organ Development                                    | function                       | function of lung                | 4.19E-02 | TXN    | 1 |
| Visual System Development and Function               | growth                         | growth of lens                  | 4.19E-02 | NCOA6  | 1 |
| Renal and Urological System Development and Function | growth                         | growth of renal glomerulus      | 4.19E-02 | ANGPT2 | 1 |
| Hereditary Disorder                                  | hepatoerythropoietic porphyria | hepatoerythropoietic porphyria  | 4.19E-02 | UROD   | 1 |
| Gastrointestinal Disease                             | hepatoerythropoietic porphyria | hepatoerythropoietic porphyria  | 4.19E-02 | UROD   | 1 |
| Metabolic Disease                                    | hepatoerythropoietic porphyria | hepatoerythropoietic porphyria  | 4.19E-02 | UROD   | 1 |
| Dermatological Diseases and Conditions               | hepatoerythropoietic porphyria | hepatoerythropoietic porphyria  | 4.19E-02 | UROD   | 1 |
| Hematological Disease                                | hepatoerythropoietic porphyria | hepatoerythropoietic porphyria  | 4.19E-02 | UROD   | 1 |
| Hepatic System Disease                               | hepatoerythropoietic porphyria | hepatoerythropoietic porphyria  | 4.19E-02 | UROD   | 1 |
| Endocrine System Disorders                           | hypercorticosteronemia         | hypercorticosteronemia          | 4.19E-02 | NR1H3  | 1 |
| Cardiovascular Disease                               | hypertrophy                    | hypertrophy of aorta            | 4.19E-02 | AGT    | 1 |
| Developmental Disorder                               | hypertrophy                    | hypertrophy of aorta            | 4.19E-02 | AGT    | 1 |
| Cardiovascular                                       | hypertrophy                    | hypertrophy of                  | 4.19E-02 | AGT    | 1 |

|                                         |                                         |                                         |          |        |   |
|-----------------------------------------|-----------------------------------------|-----------------------------------------|----------|--------|---|
| Disease                                 |                                         | coronary artery                         |          |        |   |
| Developmental Disorder                  | hypertrophy                             | hypertrophy of coronary artery          | 4.19E-02 | AGT    | 1 |
| Developmental Disorder                  | hypertrophy                             | hypertrophy of muscle cell lines        | 4.19E-02 | AGT    | 1 |
| Skeletal and Muscular Disorders         | hypertrophy                             | hypertrophy of muscle cell lines        | 4.19E-02 | AGT    | 1 |
| Free Radical Scavenging                 | induction                               | induction of superoxide                 | 4.19E-02 | AGT    | 1 |
| Small Molecule Biochemistry             | inhibition                              | inhibition of cyclic GMP                | 4.19E-02 | AGT    | 1 |
| Nucleic Acid Metabolism                 | inhibition                              | inhibition of cyclic GMP                | 4.19E-02 | AGT    | 1 |
| Molecular Transport                     | exocytosis                              | initiation of exocytosis of vesicles    | 4.19E-02 | INPP5A | 1 |
| Cellular Assembly and Organization      | exocytosis                              | initiation of exocytosis of vesicles    | 4.19E-02 | INPP5A | 1 |
| Cellular Function and Maintenance       | exocytosis                              | initiation of exocytosis of vesicles    | 4.19E-02 | INPP5A | 1 |
| Cardiovascular Disease                  | intracranial arteriovenous malformation | intracranial arteriovenous malformation | 4.19E-02 | ANGPT2 | 1 |
| Developmental Disorder                  | intracranial arteriovenous malformation | intracranial arteriovenous malformation | 4.19E-02 | ANGPT2 | 1 |
| Cancer                                  | invasion                                | invasion of trophoblast                 | 4.19E-02 | AGT    | 1 |
| Embryonic Development                   | invasion                                | invasion of trophoblast                 | 4.19E-02 | AGT    | 1 |
| Neurological Disease                    | juvenile onset Huntington disease       | juvenile onset Huntington disease       | 4.19E-02 | GRIK2  | 1 |
| Skeletal and Muscular Disorders         | juvenile onset Huntington disease       | juvenile onset Huntington disease       | 4.19E-02 | GRIK2  | 1 |
| Hereditary Disorder                     | juvenile onset Huntington disease       | juvenile onset Huntington disease       | 4.19E-02 | GRIK2  | 1 |
| Cell Death and Survival                 | killing                                 | killing of brain cancer cell lines      | 4.19E-02 | HSPA5  | 1 |
| Cell Death and Survival                 | killing                                 | killing of thymocytes                   | 4.19E-02 | LGALS3 | 1 |
| Organ Morphology                        | lack                                    | lack of choroid plexus                  | 4.19E-02 | NR1H3  | 1 |
| Nervous System Development and Function | lack                                    | lack of choroid plexus                  | 4.19E-02 | NR1H3  | 1 |

**Table S8: Ingenuity IPA<sup>®</sup> analysis of tan module gene contents.**

| Category                                              | Functions           | Functions Annotation               | p-Value  | Molecules                                                                                                                        | # Molecules |
|-------------------------------------------------------|---------------------|------------------------------------|----------|----------------------------------------------------------------------------------------------------------------------------------|-------------|
| Tissue Morphology                                     | abnormal morphology | abnormal morphology of sternebrae  | 4.73E-05 | CTGF,HOXB2,HOXB6,TASP1,TCF15,TSHZ1                                                                                               | 6           |
| Cancer                                                | tumorigenesis       | tumorigenesis of breast carcinoma  | 2.15E-04 | AKT1,ERBB2,MTA1,PRDX1,PTPRE,STX2,THBS1                                                                                           | 7           |
| Reproductive System Disease                           | tumorigenesis       | tumorigenesis of breast carcinoma  | 2.15E-04 | AKT1,ERBB2,MTA1,PRDX1,PTPRE,STX2,THBS1                                                                                           | 7           |
| Cancer                                                | tumorigenesis       | tumorigenesis of mammary tumor     | 2.59E-04 | AKT1,CCND1,CDK4,ERBB2,GADD45A,MTA1,PRDX1,PTPN1,PTPRE,STX2,THBS1                                                                  | 11          |
| Reproductive System Disease                           | tumorigenesis       | tumorigenesis of mammary tumor     | 2.59E-04 | AKT1,CCND1,CDK4,ERBB2,GADD45A,MTA1,PRDX1,PTPN1,PTPRE,STX2,THBS1                                                                  | 11          |
| Cardiovascular Disease                                | heart failure       | heart failure                      | 4.45E-04 | ADM,ATP1A1,ATP1A2,ATP2A2,BCL2L1,CA2,CACNB2,CDK4,CTGF,DGCR8,EP300,GAB2,GATA4,GUCY1A3,HAND1,LIMS1,MAPK1,MTPN,NPPB,NR3C2,PDE7B,RXRA | 22          |
| Connective Tissue Development and Function            | abnormal morphology | abnormal morphology of neural arch | 7.43E-04 | HOXB2,ITGB1BP1,RARB,TSHZ1                                                                                                        | 4           |
| Embryonic Development                                 | abnormal morphology | abnormal morphology of neural arch | 7.43E-04 | HOXB2,ITGB1BP1,RARB,TSHZ1                                                                                                        | 4           |
| Organ Development                                     | abnormal morphology | abnormal morphology of neural arch | 7.43E-04 | HOXB2,ITGB1BP1,RARB,TSHZ1                                                                                                        | 4           |
| Organ Morphology                                      | abnormal morphology | abnormal morphology of neural arch | 7.43E-04 | HOXB2,ITGB1BP1,RARB,TSHZ1                                                                                                        | 4           |
| Organismal Development                                | abnormal morphology | abnormal morphology of neural arch | 7.43E-04 | HOXB2,ITGB1BP1,RARB,TSHZ1                                                                                                        | 4           |
| Skeletal and Muscular System Development and Function | abnormal morphology | abnormal morphology of neural arch | 7.43E-04 | HOXB2,ITGB1BP1,RARB,TSHZ1                                                                                                        | 4           |
| Tissue Development                                    | abnormal morphology | abnormal morphology of             | 7.43E-04 | HOXB2,ITGB1BP1,RARB,TSHZ1                                                                                                        | 4           |

|                                                       |                                   |                                   |          |                                                                                 |    |
|-------------------------------------------------------|-----------------------------------|-----------------------------------|----------|---------------------------------------------------------------------------------|----|
|                                                       |                                   | neural arch                       |          |                                                                                 |    |
| Connective Tissue Development and Function            | morphology                        | morphology of vertebral column    | 8.19E-04 | CTGF,FSTL1,HEXB,HOXB6,ITGB1BP1,PKDCC,RARB,ROR2,SMARCAL1,TASP1,TCF15,TEAD2,THBS1 | 13 |
| Embryonic Development                                 | morphology                        | morphology of vertebral column    | 8.19E-04 | CTGF,FSTL1,HEXB,HOXB6,ITGB1BP1,PKDCC,RARB,ROR2,SMARCAL1,TASP1,TCF15,TEAD2,THBS1 | 13 |
| Organ Development                                     | morphology                        | morphology of vertebral column    | 8.19E-04 | CTGF,FSTL1,HEXB,HOXB6,ITGB1BP1,PKDCC,RARB,ROR2,SMARCAL1,TASP1,TCF15,TEAD2,THBS1 | 13 |
| Organ Morphology                                      | morphology                        | morphology of vertebral column    | 8.19E-04 | CTGF,FSTL1,HEXB,HOXB6,ITGB1BP1,PKDCC,RARB,ROR2,SMARCAL1,TASP1,TCF15,TEAD2,THBS1 | 13 |
| Organismal Development                                | morphology                        | morphology of vertebral column    | 8.19E-04 | CTGF,FSTL1,HEXB,HOXB6,ITGB1BP1,PKDCC,RARB,ROR2,SMARCAL1,TASP1,TCF15,TEAD2,THBS1 | 13 |
| Skeletal and Muscular System Development and Function | morphology                        | morphology of vertebral column    | 8.19E-04 | CTGF,FSTL1,HEXB,HOXB6,ITGB1BP1,PKDCC,RARB,ROR2,SMARCAL1,TASP1,TCF15,TEAD2,THBS1 | 13 |
| Tissue Development                                    | morphology                        | morphology of vertebral column    | 8.19E-04 | CTGF,FSTL1,HEXB,HOXB6,ITGB1BP1,PKDCC,RARB,ROR2,SMARCAL1,TASP1,TCF15,TEAD2,THBS1 | 13 |
| Nervous System Development and Function               | morphology                        | morphology of vertebral column    | 8.19E-04 | CTGF,FSTL1,HEXB,HOXB6,ITGB1BP1,PKDCC,RARB,ROR2,SMARCAL1,TASP1,TCF15,TEAD2,THBS1 | 13 |
| Nervous System Development and Function               | excitatory postsynaptic potential | excitatory postsynaptic potential | 8.88E-04 | ADCY1,ADORA1,ADORA2A,CHST10,CPLX3,EPHA4,ERBB2,GRIN2C,PIP5K1C,RARB,SLC29A1       | 11 |
| Cell-To-Cell                                          | excitatory                        | excitatory                        | 8.88E-04 | ADCY1,ADORA1,A                                                                  | 11 |

|                                                       |                        |                         |          |                                                                        |    |
|-------------------------------------------------------|------------------------|-------------------------|----------|------------------------------------------------------------------------|----|
| Signaling and Interaction                             | postsynaptic potential | postsynaptic potential  |          | DORA2A,CHST10,CPLX3,EPHA4,ERBB2,GRIN2C,PIP5K1C,RARB,SLC29A1            |    |
| Cardiovascular Disease                                | dysfunction            | dysfunction of heart    | 1.11E-03 | CACNB2,DSP,EP300,FSTL3,GATA4,ITGA5,NOX4,RXRA,TBX5                      | 9  |
| Organismal Injury and Abnormalities                   | dysfunction            | dysfunction of heart    | 1.11E-03 | CACNB2,DSP,EP300,FSTL3,GATA4,ITGA5,NOX4,RXRA,TBX5                      | 9  |
| Connective Tissue Development and Function            | morphology             | morphology of vertebrae | 1.42E-03 | CTGF,FSTL1,HEXB,HOXB6,ITGB1BP1,PKDCC,RARB,ROR2,TASP1,TCF15,TEAD2,THBS1 | 12 |
| Embryonic Development                                 | morphology             | morphology of vertebrae | 1.42E-03 | CTGF,FSTL1,HEXB,HOXB6,ITGB1BP1,PKDCC,RARB,ROR2,TASP1,TCF15,TEAD2,THBS1 | 12 |
| Organ Development                                     | morphology             | morphology of vertebrae | 1.42E-03 | CTGF,FSTL1,HEXB,HOXB6,ITGB1BP1,PKDCC,RARB,ROR2,TASP1,TCF15,TEAD2,THBS1 | 12 |
| Organ Morphology                                      | morphology             | morphology of vertebrae | 1.42E-03 | CTGF,FSTL1,HEXB,HOXB6,ITGB1BP1,PKDCC,RARB,ROR2,TASP1,TCF15,TEAD2,THBS1 | 12 |
| Organismal Development                                | morphology             | morphology of vertebrae | 1.42E-03 | CTGF,FSTL1,HEXB,HOXB6,ITGB1BP1,PKDCC,RARB,ROR2,TASP1,TCF15,TEAD2,THBS1 | 12 |
| Skeletal and Muscular System Development and Function | morphology             | morphology of vertebrae | 1.42E-03 | CTGF,FSTL1,HEXB,HOXB6,ITGB1BP1,PKDCC,RARB,ROR2,TASP1,TCF15,TEAD2,THBS1 | 12 |
| Tissue Development                                    | morphology             | morphology of vertebrae | 1.42E-03 | CTGF,FSTL1,HEXB,HOXB6,ITGB1BP1,PKDCC,RARB,ROR2,TASP1,TCF15,TEAD2,THBS1 | 12 |
| Nervous System Development and Function               | morphology             | morphology of vertebrae | 1.42E-03 | CTGF,FSTL1,HEXB,HOXB6,ITGB1BP1,PKDCC,RARB,ROR2,TASP1,TCF15,TEAD2,THBS1 | 12 |
| Skeletal and Muscular System                          | migration              | migration of myoblasts  | 1.45E-03 | SIX4,THBS4,TRPC1                                                       | 3  |

|                                                       |               |                                                |          |                                                                                                                                                                                                |    |
|-------------------------------------------------------|---------------|------------------------------------------------|----------|------------------------------------------------------------------------------------------------------------------------------------------------------------------------------------------------|----|
| Development and Function                              |               |                                                |          |                                                                                                                                                                                                |    |
| Cellular Movement                                     | migration     | migration of myoblasts                         | 1.45E-03 | SIX4,THBS4,TRPC1                                                                                                                                                                               | 3  |
| Cell Death and Survival                               | apoptosis     | apoptosis of granule cells                     | 1.52E-03 | ADORA1,AKT1,BAD,BCL2L1,CASP3,EP300,MEF2D,PRNP,SERPINF1                                                                                                                                         | 9  |
| Cancer                                                | tumorigenesis | tumorigenesis of mammary adenocarcinoma        | 1.57E-03 | ERBB2,PRDX1,PTPRE,STX2,THBS1                                                                                                                                                                   | 5  |
| Reproductive System Disease                           | tumorigenesis | tumorigenesis of mammary adenocarcinoma        | 1.57E-03 | ERBB2,PRDX1,PTPRE,STX2,THBS1                                                                                                                                                                   | 5  |
| Skeletal and Muscular System Development and Function | morphology    | morphology of axial skeleton                   | 1.59E-03 | CTGF,FSTL1,HEXB,HOXB6,ITGB1BP1,PBX1,PKDCC,RARB,ROR2,RXRA,SMA,RCAL1,TASP1,TCF15,TEAD2,THBS1,TSZH1                                                                                               | 16 |
| Nucleic Acid Metabolism                               | synthesis     | synthesis of cyclic GMP                        | 1.75E-03 | ADM,AKT1,ALDH2,GUCY1A3,NPPB,POMC                                                                                                                                                               | 6  |
| Small Molecule Biochemistry                           | synthesis     | synthesis of cyclic GMP                        | 1.75E-03 | ADM,AKT1,ALDH2,GUCY1A3,NPPB,POMC                                                                                                                                                               | 6  |
| Tissue Development                                    | adhesion      | adhesion of squamous cell carcinoma cell lines | 2.03E-03 | AKT1,ITGA5,THBS1,ZYX                                                                                                                                                                           | 4  |
| Cell-To-Cell Signaling and Interaction                | adhesion      | adhesion of squamous cell carcinoma cell lines | 2.03E-03 | AKT1,ITGA5,THBS1,ZYX                                                                                                                                                                           | 4  |
| Molecular Transport                                   | transport     | transport of monovalent inorganic cation       | 2.65E-03 | ADORA1,AHCYL1,AKT1,ATP1A1,ATP1A2,ATP1B3,ATP6V1G2,C16orf7,CA2,KCNJ5,KCNMB1,NEDD4L,NR3C2,NSF,SCN1B,TSC1                                                                                          | 16 |
| Cancer                                                | carcinoma     | carcinoma in breast                            | 2.76E-03 | ADAMTS9,AKT1,CALD1,CALM1 (includes others),CASP3,CCND1,CDK4,CTDSPL,DACH1,ECM1,ERBB2,FSTL3,FZD1,HAND1,IFIT1,MT1X,MTA1,MYLK,PRDX1,PTPRE,RAB11FIP1,RBM39,SERPINF1,SLC27A1,SMG1,STX2,SYT13,THBS1,T | 30 |

|                                                       |                     |                                     |          | UBA1A,WDR1                                                                           |    |
|-------------------------------------------------------|---------------------|-------------------------------------|----------|--------------------------------------------------------------------------------------|----|
| Molecular Transport                                   | flux                | flux of monovalent inorganic cation | 2.84E-03 | BCL2L1,FXVD1,KC NJ5,MAPK1,NR3C2                                                      | 5  |
| Cellular Function and Maintenance                     | flux                | flux of monovalent inorganic cation | 2.84E-03 | BCL2L1,FXVD1,KC NJ5,MAPK1,NR3C2                                                      | 5  |
| Connective Tissue Development and Function            | abnormal morphology | abnormal morphology of vertebrae    | 3.07E-03 | CTGF,FSTL1,HEXB ,HOXB6,ITGB1BP1, PKDCC,RARB,ROR 2,TASP1,TCF15,TE AD2                 | 11 |
| Embryonic Development                                 | abnormal morphology | abnormal morphology of vertebrae    | 3.07E-03 | CTGF,FSTL1,HEXB ,HOXB6,ITGB1BP1, PKDCC,RARB,ROR 2,TASP1,TCF15,TE AD2                 | 11 |
| Organ Development                                     | abnormal morphology | abnormal morphology of vertebrae    | 3.07E-03 | CTGF,FSTL1,HEXB ,HOXB6,ITGB1BP1, PKDCC,RARB,ROR 2,TASP1,TCF15,TE AD2                 | 11 |
| Organ Morphology                                      | abnormal morphology | abnormal morphology of vertebrae    | 3.07E-03 | CTGF,FSTL1,HEXB ,HOXB6,ITGB1BP1, PKDCC,RARB,ROR 2,TASP1,TCF15,TE AD2                 | 11 |
| Organismal Development                                | abnormal morphology | abnormal morphology of vertebrae    | 3.07E-03 | CTGF,FSTL1,HEXB ,HOXB6,ITGB1BP1, PKDCC,RARB,ROR 2,TASP1,TCF15,TE AD2                 | 11 |
| Skeletal and Muscular System Development and Function | abnormal morphology | abnormal morphology of vertebrae    | 3.07E-03 | CTGF,FSTL1,HEXB ,HOXB6,ITGB1BP1, PKDCC,RARB,ROR 2,TASP1,TCF15,TE AD2                 | 11 |
| Tissue Development                                    | abnormal morphology | abnormal morphology of vertebrae    | 3.07E-03 | CTGF,FSTL1,HEXB ,HOXB6,ITGB1BP1, PKDCC,RARB,ROR 2,TASP1,TCF15,TE AD2                 | 11 |
| Nervous System Development and Function               | abnormal morphology | abnormal morphology of vertebrae    | 3.07E-03 | CTGF,FSTL1,HEXB ,HOXB6,ITGB1BP1, PKDCC,RARB,ROR 2,TASP1,TCF15,TE AD2                 | 11 |
| Nervous System Development and Function               | action potential    | action potential of cells           | 3.36E-03 | ADCY1,ADORA1,A DORA2A,ATP1A2,C ALM1 (includes others),CHST10,ER BB2,PRNP,RARB,S CN1B | 10 |
| Cell-To-Cell Signaling and                            | action potential    | action potential of cells           | 3.36E-03 | ADCY1,ADORA1,A DORA2A,ATP1A2,C                                                       | 10 |

|                                         |                                   |                                              |          |                                                                              |    |
|-----------------------------------------|-----------------------------------|----------------------------------------------|----------|------------------------------------------------------------------------------|----|
| Interaction                             |                                   |                                              |          | ALM1 (includes others),CHST10,ERBB2,PRNP,RARB,SCN1B                          |    |
| Organismal Development                  | development                       | development of multicellular organism        | 3.38E-03 | ADAMTS9,AES,ANGPTL2,EMP1,GATA4,HOXB2,KRT8,MM P11,POMT1,ROR2,SERPINF1,VCAN    | 12 |
| Developmental Disorder                  | meiotic nondisjunction            | meiotic nondisjunction                       | 3.43E-03 | ABCG1,CCND1,CRELD1,DLL1,GRIN2C,U2AF1,UBB                                     | 7  |
| Hereditary Disorder                     | meiotic nondisjunction            | meiotic nondisjunction                       | 3.43E-03 | ABCG1,CCND1,CRELD1,DLL1,GRIN2C,U2AF1,UBB                                     | 7  |
| Nervous System Development and Function | action potential                  | action potential of neurons                  | 3.58E-03 | ADCY1,ADORA1,ADORA2A,ATP1A2,CHST10,ERBB2,PRNP,RARB,SCN1B                     | 9  |
| Cell-To-Cell Signaling and Interaction  | action potential                  | action potential of neurons                  | 3.58E-03 | ADCY1,ADORA1,ADORA2A,ATP1A2,CHST10,ERBB2,PRNP,RARB,SCN1B                     | 9  |
| Cardiovascular Disease                  | congenital heart disease          | congenital heart disease                     | 4.11E-03 | CRELD1,DGCR8,DCPD,DSP,GATA4,GJA5,JUP,PBX1,RARB,ROR2,RXRA,TEAD2               | 12 |
| Developmental Disorder                  | congenital heart disease          | congenital heart disease                     | 4.11E-03 | CRELD1,DGCR8,DCPD,DSP,GATA4,GJA5,JUP,PBX1,RARB,ROR2,RXRA,TEAD2               | 12 |
| Nervous System Development and Function | excitatory postsynaptic potential | excitatory postsynaptic potential of neurons | 4.20E-03 | ADCY1,ADORA1,ADORA2A,CHST10,ERBB2,RARB                                       | 6  |
| Cell-To-Cell Signaling and Interaction  | excitatory postsynaptic potential | excitatory postsynaptic potential of neurons | 4.20E-03 | ADCY1,ADORA1,ADORA2A,CHST10,ERBB2,RARB                                       | 6  |
| Cell Death and Survival                 | cell death                        | cell death of granule cells                  | 4.24E-03 | ADORA1,AKT1,BAD,BCL2L1,CASP3,EP300,FAIM2,MEF2D,PRNP,SERPINF1                 | 10 |
| Dermatological Diseases and Conditions  | eczema                            | eczema                                       | 4.31E-03 | ARHGDI1A,RARB,RPS6KA5,RXRA                                                   | 4  |
| Inflammatory Disease                    | eczema                            | eczema                                       | 4.31E-03 | ARHGDI1A,RARB,RPS6KA5,RXRA                                                   | 4  |
| Cardiovascular Disease                  | arrhythmia                        | arrhythmia                                   | 4.34E-03 | ADORA1,ADORA2A,ATP1A1,ATP1A2,ATP2A2,CACNB2,GJA5,JUP,KCNJ5,KCNMB1,NPPB,NR3C2, | 14 |

|                                                       |                                             |                                             |          | SCN1B,TBX5                                                          |    |
|-------------------------------------------------------|---------------------------------------------|---------------------------------------------|----------|---------------------------------------------------------------------|----|
| Digestive System Development and Function             | morphogenesis                               | morphogenesis of gastrointestinal tract     | 4.73E-03 | GATA4,SFRP1,SFRP5,STX2,VANGL2                                       | 5  |
| Cardiovascular Disease                                | congenital anomaly of cardiovascular system | congenital anomaly of cardiovascular system | 5.10E-03 | CRELD1,DGCR8,DPCD,DSP,GATA4,GJA5,JUP,PBX1,RARB,ROR2,RXRA,TBX5,TEAD2 | 13 |
| Developmental Disorder                                | congenital anomaly of cardiovascular system | congenital anomaly of cardiovascular system | 5.10E-03 | CRELD1,DGCR8,DPCD,DSP,GATA4,GJA5,JUP,PBX1,RARB,ROR2,RXRA,TBX5,TEAD2 | 13 |
| Cardiovascular Disease                                | supraventricular arrhythmia                 | supraventricular arrhythmia                 | 5.29E-03 | ADORA1,ADORA2A,ATP1A1,ATP1A2,ATP2A2,GJA5,KCNJ5,KCNMB1,NPPB,NR3C2    | 10 |
| Connective Tissue Development and Function            | abnormal morphology                         | abnormal morphology of axis                 | 5.30E-03 | FSTL1,PKDCC,TASP1                                                   | 3  |
| Embryonic Development                                 | abnormal morphology                         | abnormal morphology of axis                 | 5.30E-03 | FSTL1,PKDCC,TASP1                                                   | 3  |
| Organ Development                                     | abnormal morphology                         | abnormal morphology of axis                 | 5.30E-03 | FSTL1,PKDCC,TASP1                                                   | 3  |
| Organ Morphology                                      | abnormal morphology                         | abnormal morphology of axis                 | 5.30E-03 | FSTL1,PKDCC,TASP1                                                   | 3  |
| Organismal Development                                | abnormal morphology                         | abnormal morphology of axis                 | 5.30E-03 | FSTL1,PKDCC,TASP1                                                   | 3  |
| Skeletal and Muscular System Development and Function | abnormal morphology                         | abnormal morphology of axis                 | 5.30E-03 | FSTL1,PKDCC,TASP1                                                   | 3  |
| Tissue Development                                    | abnormal morphology                         | abnormal morphology of axis                 | 5.30E-03 | FSTL1,PKDCC,TASP1                                                   | 3  |
| Nervous System Development and Function               | abnormal morphology                         | abnormal morphology of axis                 | 5.30E-03 | FSTL1,PKDCC,TASP1                                                   | 3  |
| Organ Morphology                                      | abnormal morphology                         | abnormal morphology of barrel cortex        | 5.30E-03 | ADCY1,EPHA4,NR2F1                                                   | 3  |
| Nervous System Development and Function               | abnormal morphology                         | abnormal morphology of barrel cortex        | 5.30E-03 | ADCY1,EPHA4,NR2F1                                                   | 3  |

|                                               |                      |                                         |          |                                                                                                                                                                                                               |    |
|-----------------------------------------------|----------------------|-----------------------------------------|----------|---------------------------------------------------------------------------------------------------------------------------------------------------------------------------------------------------------------|----|
| Organ Morphology                              | abnormal morphology  | abnormal morphology of stratum spinosum | 5.30E-03 | AKT1,DSC1,JUP                                                                                                                                                                                                 | 3  |
| Cellular Function and Maintenance             | assembly             | assembly of olfactory cilia             | 5.30E-03 | BBS1,BBS4,VANGL2                                                                                                                                                                                              | 3  |
| Cell Morphology                               | assembly             | assembly of olfactory cilia             | 5.30E-03 | BBS1,BBS4,VANGL2                                                                                                                                                                                              | 3  |
| Cellular Assembly and Organization            | assembly             | assembly of olfactory cilia             | 5.30E-03 | BBS1,BBS4,VANGL2                                                                                                                                                                                              | 3  |
| Cancer                                        | pulmonary metastases | pulmonary metastases                    | 5.30E-03 | AKT1,ERBB2,ITGA5                                                                                                                                                                                              | 3  |
| Small Molecule Biochemistry                   | regulation           | regulation of L-amino acid              | 5.30E-03 | ADORA2A,MTHFR,SLC29A1                                                                                                                                                                                         | 3  |
| Amino Acid Metabolism                         | regulation           | regulation of L-amino acid              | 5.30E-03 | ADORA2A,MTHFR,SLC29A1                                                                                                                                                                                         | 3  |
| Cellular Movement                             | cell movement        | cell movement of myeloid cells          | 5.72E-03 | ADM,ADORA1,ADORA2A,ANGPTL2,ARHGAP1,C6,CAMK1D,CBFB,CCND1,CD151,COL4A1,CTGF,DARC,EPAS1,ERBB2,FCGR2A,IL27RA,JAM3,MYLK,MYLK3,NR3C2,NTN1,PIP5K1C,POMC,PRNP,QPCT,RTN4,SEMA4D,SFRP1,SWAP70,THBS1,THBS4,TNF AIP3,TSC1 | 34 |
| Hematological System Development and Function | cell movement        | cell movement of myeloid cells          | 5.72E-03 | ADM,ADORA1,ADORA2A,ANGPTL2,ARHGAP1,C6,CAMK1D,CBFB,CCND1,CD151,COL4A1,CTGF,DARC,EPAS1,ERBB2,FCGR2A,IL27RA,JAM3,MYLK,MYLK3,NR3C2,NTN1,PIP5K1C,POMC,PRNP,QPCT,RTN4,SEMA4D,SFRP1,SWAP70,THBS1,THBS4,TNF AIP3,TSC1 | 34 |
| Immune Cell Trafficking                       | cell movement        | cell movement of myeloid cells          | 5.72E-03 | ADM,ADORA1,ADORA2A,ANGPTL2,ARHGAP1,C6,CAMK1D,CBFB,CCND1,CD151,COL4A1,CTGF,DARC,EPAS1,ERBB2,FCGR2A,IL27RA,JAM3,MYLK,MYLK3,NR3C2,NTN1,PIP                                                                       | 34 |

|                                               |               |                               |          |                                                                                                                                                                                                                                                                                                                                                                                                                                                  |    |
|-----------------------------------------------|---------------|-------------------------------|----------|--------------------------------------------------------------------------------------------------------------------------------------------------------------------------------------------------------------------------------------------------------------------------------------------------------------------------------------------------------------------------------------------------------------------------------------------------|----|
|                                               |               |                               |          | 5K1C,POMC,PRNP,QPCT,RTN4,SEMA4D,SFRP1,SWAP70,THBS1,THBS4,TNF AIP3,TSC1                                                                                                                                                                                                                                                                                                                                                                           |    |
| Molecular Transport                           | transport     | transport of K+               | 5.86E-03 | ADORA1,ATP1A1,ATP1A2,ATP1B3,KCNJ5,KCNMB1,NR3C2,NSF,TSC1                                                                                                                                                                                                                                                                                                                                                                                          | 9  |
| Cancer                                        | breast cancer | breast cancer                 | 5.96E-03 | ADAMTS9,AKT1,ARHGDI1,ATRAID,BAD,CALD1,CALM1 (includes others),CASP3,CASP9,CCND1,CDK4,CLGN,CPEB2,CTDSP,CTGF,DACH1,ECM1,EGLN2,ELOVL6,EP300,ERBB2,FFIT1,FSTL3,FZD1,GRIN2C,GSTM2,H2AFY,HAND1,HIBADH,HOXB6,IFIT1,IL32,KRT8,MMP11,MT1XM,MTA1,MYLK,NEU1,NME1,NPEPPS,NRIP1,POLE4,PRDX1,PRR15L,PRRC1,PTPRE,RAB11FIP1,RANBP1,RARB,RBM39,RND3,RPL6,RRP12,SERPINF1,SFRP1,SFRP5,SLC27A1,SMG1,SOSTDC1,SOX7,STX2,STYXL1,SYT13,THBS1,TUBA1A,TUBA1B,VCAN,WDR1,ZYX | 69 |
| Cellular Movement                             | cell movement | cell movement of granulocytes | 6.12E-03 | ADM,ADORA1,ADORA2A,ARHGAP1,CAMK1D,CBFB,CD151,CTGF,DARC,ERBB2,FCGR2A,IL27RA,JAM3,MYLK,MYLK3,NTN1,PIP5K1C,POMC,RTN4,SFRP1,SWAP70,THBS4,TNFAIP3,TSC1                                                                                                                                                                                                                                                                                                | 24 |
| Hematological System Development and Function | cell movement | cell movement of granulocytes | 6.12E-03 | ADM,ADORA1,ADORA2A,ARHGAP1,CAMK1D,CBFB,CD151,CTGF,DARC,ERBB2,FCGR2A,IL27RA,JAM3,MYLK,MYLK3,NTN1,PIP5K1C,POMC,RTN4,SFRP1,                                                                                                                                                                                                                                                                                                                         | 24 |

|                                                |               |                                   |          |                                                                                                                                                                                                                                                                                                                                                                                                                                         |    |
|------------------------------------------------|---------------|-----------------------------------|----------|-----------------------------------------------------------------------------------------------------------------------------------------------------------------------------------------------------------------------------------------------------------------------------------------------------------------------------------------------------------------------------------------------------------------------------------------|----|
|                                                |               |                                   |          | SWAP70,THBS4,TNFAIP3,TSC1                                                                                                                                                                                                                                                                                                                                                                                                               |    |
| Immune Cell Trafficking                        | cell movement | cell movement of granulocytes     | 6.12E-03 | ADM,ADORA1,ADORA2A,ARHGAP1,CAMK1D,CBFB,CD151,CTGF,DARC,ERBB2,FCGR2A,IL27RA,JAM3,MYLK,MYLK3,NTN1,PIP5K1C,POMC,RTN4,SFRP1,SWAP70,THBS4,TNFAIP3,TSC1                                                                                                                                                                                                                                                                                       | 24 |
| Cell Death and Survival                        | apoptosis     | apoptosis of granulosa cells      | 7.36E-03 | AKT1,BAD,CASP3,CTGF,THBS1                                                                                                                                                                                                                                                                                                                                                                                                               | 5  |
| Developmental Disorder                         | atresia       | atresia                           | 7.36E-03 | ATP1A1,ATP1A2,GATA4,RXRA,TSHZ1                                                                                                                                                                                                                                                                                                                                                                                                          | 5  |
| Tissue Development                             | formation     | formation of extracellular matrix | 7.36E-03 | ADM,AKT1,ROR2,TNFAIP6,VCAN                                                                                                                                                                                                                                                                                                                                                                                                              | 5  |
| Tissue Morphology                              | vasodilation  | vasodilation of aorta             | 7.36E-03 | ADM,ADORA2A,AKT1,ALDH2,THBS1                                                                                                                                                                                                                                                                                                                                                                                                            | 5  |
| Organismal Development                         | vasodilation  | vasodilation of aorta             | 7.36E-03 | ADM,ADORA2A,AKT1,ALDH2,THBS1                                                                                                                                                                                                                                                                                                                                                                                                            | 5  |
| Cardiovascular System Development and Function | vasodilation  | vasodilation of aorta             | 7.36E-03 | ADM,ADORA2A,AKT1,ALDH2,THBS1                                                                                                                                                                                                                                                                                                                                                                                                            | 5  |
| Cancer                                         | mammary tumor | mammary tumor                     | 7.61E-03 | ADAMTS9,AKT1,ARHGDI1,ATRAID,BAD,CALD1,CALM1 (includes others),CASP3,CASP9,CCND1,CDK4,CLGN,CPEB2,CTD SPL,CTGF,DACH1,ECM1,EGLN2,ELOVL6,EP300,ERBB2,FDFT1,FEN1,FSTL3,FZD1,GADD45A,GRIIN2C,GSTM2,H2AFY,HAND1,HIBADH,H OXB6,IFIT1,IL32,KRT8,MMP11,MT1X,MTA1,MYLK,NEU1,NME1,NPEPPS,NRIP1,PCSK7,POLE4,PRDX1,PRR15L,PRRC1,PTPN1,PTPRE,RAB11FIP1,RANBP1,RARB,RBM39,RND3,RPL6,RRP12,SRPINF1,SFRP1,SFRP5,SLC27A1,SMG1,SOSTDC1,SOX7,STX2,STYXL1,SYT | 73 |

|                                                        |               |                                          |          |                                                                                                                                                           |    |
|--------------------------------------------------------|---------------|------------------------------------------|----------|-----------------------------------------------------------------------------------------------------------------------------------------------------------|----|
|                                                        |               |                                          |          | 13,THBS1,TUBA1A,<br>TUBA1B,VCAN,WD<br>R1,ZYX                                                                                                              |    |
| Cell-To-Cell<br>Signaling and<br>Interaction           | fusion        | fusion of plasma<br>membrane             | 7.85E-03 | NSF,RND2,SEC22B<br>,STX2                                                                                                                                  | 4  |
| Cellular<br>Assembly and<br>Organization               | fusion        | fusion of plasma<br>membrane             | 7.85E-03 | NSF,RND2,SEC22B<br>,STX2                                                                                                                                  | 4  |
| Nervous<br>System<br>Development<br>and Function       | projection    | projection of<br>axons                   | 7.85E-03 | NR2F1,NR3C2,NTN<br>1,RTN4                                                                                                                                 | 4  |
| Cell<br>Morphology                                     | projection    | projection of<br>axons                   | 7.85E-03 | NR2F1,NR3C2,NTN<br>1,RTN4                                                                                                                                 | 4  |
| Cellular<br>Assembly and<br>Organization               | projection    | projection of<br>axons                   | 7.85E-03 | NR2F1,NR3C2,NTN<br>1,RTN4                                                                                                                                 | 4  |
| Cell<br>Morphology                                     | shape change  | shape change of<br>gonadal cell<br>lines | 7.85E-03 | AKT1,ARHGAP24,D<br>IAPH1,NSF                                                                                                                              | 4  |
| Gastrointestinal<br>Disease                            | vomiting      | vomiting                                 | 7.85E-03 | ATP1A1,ATP1A2,C<br>A2,GRIN2C                                                                                                                              | 4  |
| Cellular<br>Movement                                   | cell movement | cell movement<br>of neutrophils          | 8.38E-03 | ADM,ADORA1,ADO<br>RA2A,ARHGAP1,C<br>AMK1D,CD151,CTG<br>F,DARC,ERBB2,FC<br>GR2A,JAM3,MYLK,<br>MYLK3,NTN1,PIP5<br>K1C,RTN4,SFRP1,T<br>HBS4,TNFAIP3,TS<br>C1 | 20 |
| Hematological<br>System<br>Development<br>and Function | cell movement | cell movement<br>of neutrophils          | 8.38E-03 | ADM,ADORA1,ADO<br>RA2A,ARHGAP1,C<br>AMK1D,CD151,CTG<br>F,DARC,ERBB2,FC<br>GR2A,JAM3,MYLK,<br>MYLK3,NTN1,PIP5<br>K1C,RTN4,SFRP1,T<br>HBS4,TNFAIP3,TS<br>C1 | 20 |
| Immune Cell<br>Trafficking                             | cell movement | cell movement<br>of neutrophils          | 8.38E-03 | ADM,ADORA1,ADO<br>RA2A,ARHGAP1,C<br>AMK1D,CD151,CTG<br>F,DARC,ERBB2,FC<br>GR2A,JAM3,MYLK,<br>MYLK3,NTN1,PIP5<br>K1C,RTN4,SFRP1,T<br>HBS4,TNFAIP3,TS<br>C1 | 20 |
| Inflammatory<br>Response                               | cell movement | cell movement<br>of neutrophils          | 8.38E-03 | ADM,ADORA1,ADO<br>RA2A,ARHGAP1,C<br>AMK1D,CD151,CTG<br>F,DARC,ERBB2,FC<br>GR2A,JAM3,MYLK,                                                                 | 20 |

|                                                    |             |                                               |          |                                                                                                                                                                                                                                   |    |
|----------------------------------------------------|-------------|-----------------------------------------------|----------|-----------------------------------------------------------------------------------------------------------------------------------------------------------------------------------------------------------------------------------|----|
|                                                    |             |                                               |          | MYLK3,NTN1,PIP5<br>K1C,RTN4,SFRP1,T<br>HBS4,TNFAIP3,TS<br>C1                                                                                                                                                                      |    |
| Molecular<br>Transport                             | transport   | transport of ion                              | 8.40E-03 | ADORA1,AHCYL1,A<br>KAP7,AKT1,AQP7,A<br>TP1A1,ATP1A2,AT<br>P1B3,ATP2A2,ATP6<br>V1G2,C16orf7,CA2,<br>CACNB2,FXDY1,G<br>RIN2C,KCNJ5,KCN<br>MB1,NEDD4L,NIPA<br>2,NR3C2,NSF,PCY<br>OX1,PPP1R1A,SCN<br>1B,SLC30A3,SLC4A<br>3,TRPC1,TSC1 | 28 |
| Tissue<br>Morphology                               | quantity    | quantity of<br>neuroendocrine<br>cells        | 8.51E-03 | AKT1,CDK4,DACH1<br>,FSTL3,NTN1,POM<br>C                                                                                                                                                                                           | 6  |
| Endocrine<br>System<br>Development<br>and Function | quantity    | quantity of<br>neuroendocrine<br>cells        | 8.51E-03 | AKT1,CDK4,DACH1<br>,FSTL3,NTN1,POM<br>C                                                                                                                                                                                           | 6  |
| Developmental<br>Disorder                          | trisomy     | trisomy                                       | 8.51E-03 | ABCG1,CCND1,CR<br>ELD1,DLL1,GRIN2C<br>,UBB                                                                                                                                                                                        | 6  |
| Hereditary<br>Disorder                             | trisomy     | trisomy                                       | 8.51E-03 | ABCG1,CCND1,CR<br>ELD1,DLL1,GRIN2C<br>,UBB                                                                                                                                                                                        | 6  |
| Cell Death and<br>Survival                         | apoptosis   | apoptosis of<br>endothelial cells             | 8.57E-03 | ADM,AKT1,ALDH2,<br>BCL2L1,CASP3,CA<br>SP9,DDIT3,ICMT,IT<br>SN1,MAPK1,NTN1,<br>PRDX6,SERPINF1,<br>TBX5,THBS1,TNFAI<br>P3                                                                                                           | 16 |
| Tissue<br>Development                              | adhesion    | adhesion of<br>extracellular<br>matrix        | 9.12E-03 | CD151,CTGF,ITGA<br>5,ITGB1BP1,JAM3,<br>LIMS1,THBS1,TSC1<br>,VCAN                                                                                                                                                                  | 9  |
| Cell Death and<br>Survival                         | apoptosis   | apoptosis of<br>vascular<br>endothelial cells | 9.69E-03 | ADM,AKT1,ALDH2,<br>BCL2L1,CASP3,CA<br>SP9,DDIT3,ITSN1,<br>MAPK1,THBS1                                                                                                                                                             | 10 |
| Embryonic<br>Development                           | development | development of<br>ear                         | 9.92E-03 | AKT1,DLL1,MCOLN<br>3,NR2F1,NTN1,OS<br>R1,ROR2,SIX4,TCF<br>15,TSHZ1,VANGL2                                                                                                                                                         | 11 |
| Organ<br>Development                               | development | development of<br>ear                         | 9.92E-03 | AKT1,DLL1,MCOLN<br>3,NR2F1,NTN1,OS<br>R1,ROR2,SIX4,TCF<br>15,TSHZ1,VANGL2                                                                                                                                                         | 11 |
| Organismal<br>Development                          | development | development of<br>ear                         | 9.92E-03 | AKT1,DLL1,MCOLN<br>3,NR2F1,NTN1,OS<br>R1,ROR2,SIX4,TCF                                                                                                                                                                            | 11 |

|                                                         |                     |                                          |          |                                                                                                      |    |
|---------------------------------------------------------|---------------------|------------------------------------------|----------|------------------------------------------------------------------------------------------------------|----|
|                                                         |                     |                                          |          | 15,TSHZ1,VANGL2                                                                                      |    |
| Tissue Development                                      | development         | development of ear                       | 9.92E-03 | AKT1,DLL1,MCOLN3,NR2F1,NTN1,OSR1,ROR2,SIX4,TCF15,TSHZ1,VANGL2                                        | 11 |
| Auditory and Vestibular System Development and Function | development         | development of ear                       | 9.92E-03 | AKT1,DLL1,MCOLN3,NR2F1,NTN1,OSR1,ROR2,SIX4,TCF15,TSHZ1,VANGL2                                        | 11 |
| Organismal Injury and Abnormalities                     | injury              | injury of kidney                         | 1.02E-02 | ADM,ADORA1,ADORA2A,ARHGDI A,FCGR2A,NR3C2,NTN1,THBS1                                                  | 8  |
| Renal and Urological Disease                            | injury              | injury of kidney                         | 1.02E-02 | ADM,ADORA1,ADORA2A,ARHGDI A,FCGR2A,NR3C2,NTN1,THBS1                                                  | 8  |
| Cell Death and Survival                                 | cell death          | cell death of endothelial cells          | 1.04E-02 | ADM,AKT1,ALDH2,BCL2L1,CASP3,CASP9,DDIT3,ICMT,IL32,ITSN1,MAPK1,NTN1,PRDX6,SERPINF1,TBX5,THBS1,TNFAIP3 | 17 |
| Cardiovascular Disease                                  | hypertrophy         | hypertrophy of right ventricle           | 1.09E-02 | EPAS1,GUCY1A3,MYLK3,PBX1,PBX3                                                                        | 5  |
| Developmental Disorder                                  | hypertrophy         | hypertrophy of right ventricle           | 1.09E-02 | EPAS1,GUCY1A3,MYLK3,PBX1,PBX3                                                                        | 5  |
| Tissue Morphology                                       | vasodilation        | vasodilation of artery                   | 1.12E-02 | ADM,ADORA2A,AKT1,ALDH2,GUCY1A3,PTPN1,THBS1                                                           | 7  |
| Organismal Development                                  | vasodilation        | vasodilation of artery                   | 1.12E-02 | ADM,ADORA2A,AKT1,ALDH2,GUCY1A3,PTPN1,THBS1                                                           | 7  |
| Cardiovascular System Development and Function          | vasodilation        | vasodilation of artery                   | 1.12E-02 | ADM,ADORA2A,AKT1,ALDH2,GUCY1A3,PTPN1,THBS1                                                           | 7  |
| Cell Death and Survival                                 | cell death          | cell death of vascular endothelial cells | 1.18E-02 | ADM,AKT1,ALDH2,BCL2L1,CASP3,CASP9,DDIT3,IL32,ITSN1,MAPK1,THBS1                                       | 11 |
| Cancer                                                  | ductal carcinoma    | ductal carcinoma                         | 1.18E-02 | AKT1,CCND1,ECM1,ERBB2,HAND1,MT1X,MTA1,RAB11FIP1,RBM39,SERPINF1,SMG1                                  | 11 |
| Embryonic Development                                   | abnormal morphology | abnormal morphology of sclera            | 1.21E-02 | ADORA2A,RARB,RXRA                                                                                    | 3  |
| Organ Development                                       | abnormal morphology | abnormal morphology of sclera            | 1.21E-02 | ADORA2A,RARB,RXRA                                                                                    | 3  |
| Organ                                                   | abnormal            | abnormal                                 | 1.21E-02 | ADORA2A,RARB,RXRA                                                                                    | 3  |

|                                              |                          |                                       |          |                     |   |
|----------------------------------------------|--------------------------|---------------------------------------|----------|---------------------|---|
| Morphology                                   | morphology               | morphology of sclera                  |          | XRA                 |   |
| Organismal Development                       | abnormal morphology      | abnormal morphology of sclera         | 1.21E-02 | ADORA2A,RARB,RXRA   | 3 |
| Tissue Development                           | abnormal morphology      | abnormal morphology of sclera         | 1.21E-02 | ADORA2A,RARB,RXRA   | 3 |
| Visual System Development and Function       | abnormal morphology      | abnormal morphology of sclera         | 1.21E-02 | ADORA2A,RARB,RXRA   | 3 |
| Reproductive System Development and Function | acrosome reaction        | acrosome reaction of sperm            | 1.21E-02 | NSF,PRNP,PTPN1      | 3 |
| Connective Tissue Development and Function   | activation               | activation of fibroblasts             | 1.21E-02 | CCND1,CDK4,IFNAR2   | 3 |
| Cell-To-Cell Signaling and Interaction       | activation               | activation of fibroblasts             | 1.21E-02 | CCND1,CDK4,IFNAR2   | 3 |
| Cell Death and Survival                      | cell death               | cell death of medium spiny neurons    | 1.21E-02 | ADORA2A,CASP3,CASP9 | 3 |
| Cell Death and Survival                      | condensation             | condensation of cells                 | 1.21E-02 | BCL2L1,CASP3,EMP1   | 3 |
| Embryonic Development                        | development              | development of striatum               | 1.21E-02 | BBS1,BBS4,RARB      | 3 |
| Organ Development                            | development              | development of striatum               | 1.21E-02 | BBS1,BBS4,RARB      | 3 |
| Organismal Development                       | development              | development of striatum               | 1.21E-02 | BBS1,BBS4,RARB      | 3 |
| Tissue Development                           | development              | development of striatum               | 1.21E-02 | BBS1,BBS4,RARB      | 3 |
| Nervous System Development and Function      | development              | development of striatum               | 1.21E-02 | BBS1,BBS4,RARB      | 3 |
| Cancer                                       | ductal carcinoma in situ | ductal carcinoma in situ              | 1.21E-02 | AKT1,ERBB2,RBM39    | 3 |
| Molecular Transport                          | efflux                   | efflux of monovalent inorganic cation | 1.21E-02 | BCL2L1,FXVD1,MAPK1  | 3 |
| Cellular Function and Maintenance            | efflux                   | efflux of monovalent inorganic cation | 1.21E-02 | BCL2L1,FXVD1,MAPK1  | 3 |
| Molecular Transport                          | flux                     | flux of Na+                           | 1.21E-02 | FXVD1,KCNJ5,NR3C2   | 3 |
| Cellular Function and Maintenance            | flux                     | flux of Na+                           | 1.21E-02 | FXVD1,KCNJ5,NR3C2   | 3 |
| Cancer                                       | islet-cell adenoma       | islet-cell adenoma                    | 1.21E-02 | ATP1A1,ATP1A2,PRDX1 | 3 |

|                                                |                            |                                            |          |                         |   |
|------------------------------------------------|----------------------------|--------------------------------------------|----------|-------------------------|---|
| Gastrointestinal Disease                       | islet-cell adenoma         | islet-cell adenoma                         | 1.21E-02 | ATP1A1,ATP1A2,P<br>RDX1 | 3 |
| Endocrine System Disorders                     | islet-cell adenoma         | islet-cell adenoma                         | 1.21E-02 | ATP1A1,ATP1A2,P<br>RDX1 | 3 |
| Tissue Morphology                              | quantity                   | quantity of microvessel                    | 1.21E-02 | ADAMTS9,ERBB2,T<br>HBS4 | 3 |
| Organismal Development                         | quantity                   | quantity of microvessel                    | 1.21E-02 | ADAMTS9,ERBB2,T<br>HBS4 | 3 |
| Cardiovascular System Development and Function | quantity                   | quantity of microvessel                    | 1.21E-02 | ADAMTS9,ERBB2,T<br>HBS4 | 3 |
| Small Molecule Biochemistry                    | synthesis                  | synthesis of sulfur amino acid             | 1.21E-02 | MTHFR,MTR,SHMT<br>2     | 3 |
| Amino Acid Metabolism                          | synthesis                  | synthesis of sulfur amino acid             | 1.21E-02 | MTHFR,MTR,SHMT<br>2     | 3 |
| Cancer                                         | Zollinger-Ellison syndrome | Zollinger-Ellison syndrome                 | 1.28E-02 | ATP1A1,ATP1A2           | 2 |
| Gastrointestinal Disease                       | Zollinger-Ellison syndrome | Zollinger-Ellison syndrome                 | 1.28E-02 | ATP1A1,ATP1A2           | 2 |
| Endocrine System Disorders                     | Zollinger-Ellison syndrome | Zollinger-Ellison syndrome                 | 1.28E-02 | ATP1A1,ATP1A2           | 2 |
| Tissue Morphology                              | abnormal morphology        | abnormal morphology of hypoglossal nerve   | 1.28E-02 | ERBB2,RARB              | 2 |
| Nervous System Development and Function        | abnormal morphology        | abnormal morphology of hypoglossal nerve   | 1.28E-02 | ERBB2,RARB              | 2 |
| Tissue Morphology                              | abnormal morphology        | abnormal morphology of sagittal suture     | 1.28E-02 | CASP3,ITGB1BP1          | 2 |
| Organ Morphology                               | abnormal morphology        | abnormal morphology of small adrenal gland | 1.28E-02 | PBX1,POMC               | 2 |
| Connective Tissue Development and Function     | abnormal morphology        | abnormal morphology of stylopod            | 1.28E-02 | FSTL1,ROR2              | 2 |
| Embryonic Development                          | abnormal morphology        | abnormal morphology of stylopod            | 1.28E-02 | FSTL1,ROR2              | 2 |
| Organ Development                              | abnormal morphology        | abnormal morphology of stylopod            | 1.28E-02 | FSTL1,ROR2              | 2 |
| Organ Morphology                               | abnormal morphology        | abnormal morphology of stylopod            | 1.28E-02 | FSTL1,ROR2              | 2 |
| Organismal                                     | abnormal                   | abnormal                                   | 1.28E-02 | FSTL1,ROR2              | 2 |

|                                                       |                                                                     |                                                                     |          |                |   |
|-------------------------------------------------------|---------------------------------------------------------------------|---------------------------------------------------------------------|----------|----------------|---|
| Development                                           | morphology                                                          | morphology of stylopod                                              |          |                |   |
| Skeletal and Muscular System Development and Function | abnormal morphology                                                 | abnormal morphology of stylopod                                     | 1.28E-02 | FSTL1,ROR2     | 2 |
| Tissue Development                                    | abnormal morphology                                                 | abnormal morphology of stylopod                                     | 1.28E-02 | FSTL1,ROR2     | 2 |
| Dermatological Diseases and Conditions                | acantholysis                                                        | acantholysis                                                        | 1.28E-02 | DSC1,JUP       | 2 |
| Cell Death and Survival                               | apoptosis                                                           | apoptosis of blood platelets                                        | 1.28E-02 | BCL2L1,CASP9   | 2 |
| Cell Death and Survival                               | apoptosis                                                           | apoptosis of medium spiny neurons                                   | 1.28E-02 | CASP3,CASP9    | 2 |
| Cell Cycle                                            | G1 phase                                                            | arrest in G1 phase of neuroblastoma cell lines                      | 1.28E-02 | CCND1,CDK4     | 2 |
| Cardiovascular Disease                                | atrioventricular septal defect and common atrioventricular junction | atrioventricular septal defect and common atrioventricular junction | 1.28E-02 | CRELD1,GATA4   | 2 |
| Developmental Disorder                                | atrioventricular septal defect and common atrioventricular junction | atrioventricular septal defect and common atrioventricular junction | 1.28E-02 | CRELD1,GATA4   | 2 |
| Cell-To-Cell Signaling and Interaction                | binding                                                             | binding of dopamine                                                 | 1.28E-02 | ADORA1,ADORA2A | 2 |
| Small Molecule Biochemistry                           | binding                                                             | binding of dopamine                                                 | 1.28E-02 | ADORA1,ADORA2A | 2 |
| Drug Metabolism                                       | binding                                                             | binding of dopamine                                                 | 1.28E-02 | ADORA1,ADORA2A | 2 |
| Skeletal and Muscular System Development and Function | cell cycle progression                                              | cell cycle progression of skeletal muscle satellite cells           | 1.28E-02 | CCND1,CDK4     | 2 |
| Cell Cycle                                            | cell cycle progression                                              | cell cycle progression of skeletal muscle satellite cells           | 1.28E-02 | CCND1,CDK4     | 2 |
| Cell Death and Survival                               | cell death                                                          | cell death of naive helper T cells                                  | 1.28E-02 | CASP3,CASP9    | 2 |
| Organismal Injury and Abnormalities                   | chronic lower back pain                                             | chronic lower back pain                                             | 1.28E-02 | GRIN2C,SCN1B   | 2 |
| Tumor                                                 | clearance                                                           | clearance of                                                        | 1.28E-02 | CD151,NME1     | 2 |

|                                            |                         |                                         |          |                |   |
|--------------------------------------------|-------------------------|-----------------------------------------|----------|----------------|---|
| Morphology                                 |                         | tumor                                   |          |                |   |
| Cell Death and Survival                    | colony survival         | colony survival of lymphoma cell lines  | 1.28E-02 | BCL2L1,CCND1   | 2 |
| Cellular Function and Maintenance          | colony survival         | colony survival of lymphoma cell lines  | 1.28E-02 | BCL2L1,CCND1   | 2 |
| Connective Tissue Development and Function | cytotoxicity            | cytotoxicity of fibroblast cell lines   | 1.28E-02 | ERBB2,TNFAIP3  | 2 |
| Cell Death and Survival                    | cytotoxicity            | cytotoxicity of fibroblast cell lines   | 1.28E-02 | ERBB2,TNFAIP3  | 2 |
| Cancer                                     | tumorigenesis           | delay in tumorigenesis of mammary tumor | 1.28E-02 | ERBB2,PTPN1    | 2 |
| Reproductive System Disease                | tumorigenesis           | delay in tumorigenesis of mammary tumor | 1.28E-02 | ERBB2,PTPN1    | 2 |
| Cardiovascular Disease                     | diastolic heart failure | diastolic heart failure                 | 1.28E-02 | CTGF,NR3C2     | 2 |
| Cellular Assembly and Organization         | dilation                | dilation of endoplasmic reticulum       | 1.28E-02 | CASP3,CASP9    | 2 |
| Cancer                                     | endocrine adenoma       | endocrine adenoma                       | 1.28E-02 | ATP1A1,ATP1A2  | 2 |
| Inflammatory Disease                       | erosive esophagitis     | erosive esophagitis                     | 1.28E-02 | ATP1A1,ATP1A2  | 2 |
| Gastrointestinal Disease                   | erosive esophagitis     | erosive esophagitis                     | 1.28E-02 | ATP1A1,ATP1A2  | 2 |
| Behavior                                   | escape behavior         | escape behavior                         | 1.28E-02 | ADORA1,ADORA2A | 2 |
| Developmental Disorder                     | esophageal atresia      | esophageal atresia                      | 1.28E-02 | ATP1A1,ATP1A2  | 2 |
| Gastrointestinal Disease                   | esophageal atresia      | esophageal atresia                      | 1.28E-02 | ATP1A1,ATP1A2  | 2 |
| Developmental Disorder                     | exophthalmos            | exophthalmos                            | 1.28E-02 | ITGB1BP1,MTHFR | 2 |
| Ophthalmic Disease                         | exophthalmos            | exophthalmos                            | 1.28E-02 | ITGB1BP1,MTHFR | 2 |
| Tissue Development                         | formation               | formation of desmosomes                 | 1.28E-02 | DSP,JUP        | 2 |
| Cell-To-Cell Signaling and Interaction     | formation               | formation of desmosomes                 | 1.28E-02 | DSP,JUP        | 2 |
| Cellular Function and Maintenance          | formation               | formation of desmosomes                 | 1.28E-02 | DSP,JUP        | 2 |
| Cellular Assembly and Organization         | formation               | formation of desmosomes                 | 1.28E-02 | DSP,JUP        | 2 |
| Nervous System Development and Function    | function                | function of GABAergic neurons           | 1.28E-02 | ADORA1,ADORA2A | 2 |

|                                                       |                    |                                                  |          |                |   |
|-------------------------------------------------------|--------------------|--------------------------------------------------|----------|----------------|---|
| Cellular Function and Maintenance                     | function           | function of GABAergic neurons                    | 1.28E-02 | ADORA1,ADORA2A | 2 |
| Skeletal and Muscular System Development and Function | fusion             | fusion of neural arch                            | 1.28E-02 | RARB,TSHZ1     | 2 |
| Dermatological Diseases and Conditions                | hand dermatosis    | hand dermatosis                                  | 1.28E-02 | RARB,RXRA      | 2 |
| Endocrine System Disorders                            | hyperaldosteronism | hyperaldosteronism                               | 1.28E-02 | KCNJ5,NR3C2    | 2 |
| Metabolic Disease                                     | hyperaldosteronism | hyperaldosteronism                               | 1.28E-02 | KCNJ5,NR3C2    | 2 |
| Cancer                                                | hyperplasia        | hyperplasia of gastric epithelium                | 1.28E-02 | ATP2A2,THBS1   | 2 |
| Gastrointestinal Disease                              | hyperplasia        | hyperplasia of gastric epithelium                | 1.28E-02 | ATP2A2,THBS1   | 2 |
| Hematological System Development and Function         | inactivation       | inactivation of lymphocytes                      | 1.28E-02 | ADORA2A,POMC   | 2 |
| Cellular Development                                  | inactivation       | inactivation of lymphocytes                      | 1.28E-02 | ADORA2A,POMC   | 2 |
| Cell Morphology                                       | integrity          | integrity of adherens junctions                  | 1.28E-02 | PIP5K1C,ZYX    | 2 |
| Cellular Assembly and Organization                    | integrity          | integrity of adherens junctions                  | 1.28E-02 | PIP5K1C,ZYX    | 2 |
| Cellular Movement                                     | invasion           | invasion of central nervous system cells         | 1.28E-02 | B4GALT5,ERBB2  | 2 |
| Cell Death and Survival                               | killing            | killing of cervical cancer cell lines            | 1.28E-02 | AKT1,BCL2L1    | 2 |
| Organ Morphology                                      | lack               | lack of barrel cortex                            | 1.28E-02 | ADCY1,NR2F1    | 2 |
| Nervous System Development and Function               | lack               | lack of barrel cortex                            | 1.28E-02 | ADCY1,NR2F1    | 2 |
| Cellular Development                                  | lifespan           | lifespan of chronic lymphocytic leukemia B cells | 1.28E-02 | PLXNB1,SEMA4D  | 2 |
| Organismal Injury and Abnormalities                   | malformation       | malformation of aortic valve                     | 1.28E-02 | PBX1,PBX3      | 2 |
| Developmental Disorder                                | malformation       | malformation of aortic valve                     | 1.28E-02 | PBX1,PBX3      | 2 |
| Organismal                                            | malformation       | malformation of                                  | 1.28E-02 | PBX1,PBX3      | 2 |

|                                         |                            |                                                 |          |                |   |
|-----------------------------------------|----------------------------|-------------------------------------------------|----------|----------------|---|
| Injury and Abnormalities                |                            | pulmonary valve                                 |          |                |   |
| Developmental Disorder                  | malformation               | malformation of pulmonary valve                 | 1.28E-02 | PBX1,PBX3      | 2 |
| Cancer                                  | metastasis                 | metastasis of medulloblastoma                   | 1.28E-02 | CDCA7L,ERBB2   | 2 |
| Neurological Disease                    | metastasis                 | metastasis of medulloblastoma                   | 1.28E-02 | CDCA7L,ERBB2   | 2 |
| Cardiovascular Disease                  | mitochondrial myopathy     | mitochondrial myopathy                          | 1.28E-02 | GOLPH3,PUS1    | 2 |
| Metabolic Disease                       | mitochondrial myopathy     | mitochondrial myopathy                          | 1.28E-02 | GOLPH3,PUS1    | 2 |
| Neurological Disease                    | mitochondrial myopathy     | mitochondrial myopathy                          | 1.28E-02 | GOLPH3,PUS1    | 2 |
| Skeletal and Muscular Disorders         | mitochondrial myopathy     | mitochondrial myopathy                          | 1.28E-02 | GOLPH3,PUS1    | 2 |
| Inflammatory Disease                    | mucositis                  | mucositis                                       | 1.28E-02 | GRIN2C,MTHFR   | 2 |
| Gastrointestinal Disease                | mucositis                  | mucositis                                       | 1.28E-02 | GRIN2C,MTHFR   | 2 |
| Nervous System Development and Function | neurological function      | neurological function of central nervous system | 1.28E-02 | ADORA1,ADORA2A | 2 |
| Gastrointestinal Disease                | non-erosive reflux disease | non-erosive reflux disease                      | 1.28E-02 | ATP1A1,ATP1A2  | 2 |
| Gastrointestinal Disease                | peptic disorder            | peptic disorder                                 | 1.28E-02 | ATP1A1,ATP1A2  | 2 |
| Small Molecule Biochemistry             | peroxidation               | peroxidation of phospholipid                    | 1.28E-02 | NOX4,PRDX6     | 2 |
| Cellular Compromise                     | peroxidation               | peroxidation of phospholipid                    | 1.28E-02 | NOX4,PRDX6     | 2 |
| Lipid Metabolism                        | peroxidation               | peroxidation of phospholipid                    | 1.28E-02 | NOX4,PRDX6     | 2 |
| Nervous System Development and Function | projection                 | projection of thalamocortical axons             | 1.28E-02 | NR2F1,NTN1     | 2 |
| Cell Morphology                         | projection                 | projection of thalamocortical axons             | 1.28E-02 | NR2F1,NTN1     | 2 |
| Cellular Assembly and Organization      | projection                 | projection of thalamocortical axons             | 1.28E-02 | NR2F1,NTN1     | 2 |
| Cellular Development                    | proliferation              | proliferation of mammary tumor                  | 1.28E-02 | AKT1,ERBB2     | 2 |
| Cellular Growth and Proliferation       | proliferation              | proliferation of mammary tumor                  | 1.28E-02 | AKT1,ERBB2     | 2 |
| Tumor Morphology                        | proliferation              | proliferation of mammary tumor                  | 1.28E-02 | AKT1,ERBB2     | 2 |
| Cell-To-Cell                            | quantity                   | quantity of                                     | 1.28E-02 | DSP,ERBB2      | 2 |

|                                            |                                       |                                       |          |                |   |
|--------------------------------------------|---------------------------------------|---------------------------------------|----------|----------------|---|
| Signaling and Interaction                  |                                       | adherens junctions                    |          |                |   |
| Cellular Assembly and Organization         | quantity                              | quantity of adherens junctions        | 1.28E-02 | DSP,ERBB2      | 2 |
| Cancer                                     | quantity                              | quantity of mammary tumor             | 1.28E-02 | CDK4,ERBB2     | 2 |
| Reproductive System Disease                | quantity                              | quantity of mammary tumor             | 1.28E-02 | CDK4,ERBB2     | 2 |
| Tissue Morphology                          | quantity                              | quantity of mural cells               | 1.28E-02 | EPAS1,VASH1    | 2 |
| Cancer                                     | quantity                              | quantity of pulmonary metastases      | 1.28E-02 | AKT1,ERBB2     | 2 |
| Connective Tissue Development and Function | reactivation                          | reactivation of fibroblasts           | 1.28E-02 | CCND1,CDK4     | 2 |
| Cell-To-Cell Signaling and Interaction     | reactivation                          | reactivation of fibroblasts           | 1.28E-02 | CCND1,CDK4     | 2 |
| Cell Signaling                             | removal                               | removal of Ca <sup>2+</sup>           | 1.28E-02 | ATP2A2,SLC27A1 | 2 |
| Vitamin and Mineral Metabolism             | removal                               | removal of Ca <sup>2+</sup>           | 1.28E-02 | ATP2A2,SLC27A1 | 2 |
| Cardiovascular Disease                     | salt-sensitive essential hypertension | salt-sensitive essential hypertension | 1.28E-02 | CORIN,NEDD4L   | 2 |
| Cell Morphology                            | size                                  | size of megakaryocytes                | 1.28E-02 | CCND1,CDK4     | 2 |
| Inflammatory Response                      | size                                  | size of megakaryocytes                | 1.28E-02 | CCND1,CDK4     | 2 |
| Hematopoiesis                              | size                                  | size of megakaryocytes                | 1.28E-02 | CCND1,CDK4     | 2 |
| Lymphoid Tissue Structure and Development  | size                                  | size of megakaryocytes                | 1.28E-02 | CCND1,CDK4     | 2 |
| Cancer                                     | sporadic mastocytosis                 | sporadic mastocytosis                 | 1.28E-02 | ATP1A1,ATP1A2  | 2 |
| Organismal Injury and Abnormalities        | sporadic mastocytosis                 | sporadic mastocytosis                 | 1.28E-02 | ATP1A1,ATP1A2  | 2 |
| Hematological Disease                      | sporadic mastocytosis                 | sporadic mastocytosis                 | 1.28E-02 | ATP1A1,ATP1A2  | 2 |
| Immunological Disease                      | sporadic mastocytosis                 | sporadic mastocytosis                 | 1.28E-02 | ATP1A1,ATP1A2  | 2 |
| Cardiovascular Disease                     | stenosis                              | stenosis of mitral valve              | 1.28E-02 | GJA5,RXRA      | 2 |
| Organismal Injury and Abnormalities        | stenosis                              | stenosis of mitral valve              | 1.28E-02 | GJA5,RXRA      | 2 |
| Small Molecule Biochemistry                | synthesis                             | synthesis of L-methionine             | 1.28E-02 | MTHFR,MTR      | 2 |

|                                                       |                     |                                           |          |                         |   |
|-------------------------------------------------------|---------------------|-------------------------------------------|----------|-------------------------|---|
| Amino Acid Metabolism                                 | synthesis           | synthesis of L-methionine                 | 1.28E-02 | MTHFR,MTR               | 2 |
| Small Molecule Biochemistry                           | synthesis           | synthesis of cardiolipin                  | 1.28E-02 | PGS1,SLC27A1            | 2 |
| Lipid Metabolism                                      | synthesis           | synthesis of cardiolipin                  | 1.28E-02 | PGS1,SLC27A1            | 2 |
| Tissue Morphology                                     | vasodilation        | vasodilation of abdominal aorta           | 1.28E-02 | ADM,AKT1                | 2 |
| Organismal Development                                | vasodilation        | vasodilation of abdominal aorta           | 1.28E-02 | ADM,AKT1                | 2 |
| Cardiovascular System Development and Function        | vasodilation        | vasodilation of abdominal aorta           | 1.28E-02 | ADM,AKT1                | 2 |
| Nervous System Development and Function               | waking              | waking                                    | 1.28E-02 | ADORA1,ADORA2A          | 2 |
| Connective Tissue Development and Function            | abnormal morphology | abnormal morphology of middle ear ossicle | 1.29E-02 | PBX1,RARB,ROR2,TSHZ1    | 4 |
| Embryonic Development                                 | abnormal morphology | abnormal morphology of middle ear ossicle | 1.29E-02 | PBX1,RARB,ROR2,TSHZ1    | 4 |
| Organ Development                                     | abnormal morphology | abnormal morphology of middle ear ossicle | 1.29E-02 | PBX1,RARB,ROR2,TSHZ1    | 4 |
| Organ Morphology                                      | abnormal morphology | abnormal morphology of middle ear ossicle | 1.29E-02 | PBX1,RARB,ROR2,TSHZ1    | 4 |
| Organismal Development                                | abnormal morphology | abnormal morphology of middle ear ossicle | 1.29E-02 | PBX1,RARB,ROR2,TSHZ1    | 4 |
| Skeletal and Muscular System Development and Function | abnormal morphology | abnormal morphology of middle ear ossicle | 1.29E-02 | PBX1,RARB,ROR2,TSHZ1    | 4 |
| Tissue Development                                    | abnormal morphology | abnormal morphology of middle ear ossicle | 1.29E-02 | PBX1,RARB,ROR2,TSHZ1    | 4 |
| Cellular Growth and Proliferation                     | colony formation    | colony formation of epithelial cell lines | 1.29E-02 | CCND1,ERBB2,MAPK1,PRCC  | 4 |
| Hair and Skin Development and Function                | colony formation    | colony formation of epithelial cell lines | 1.29E-02 | CCND1,ERBB2,MAPK1,PRCC  | 4 |
| Cell Morphology                                       | size                | size of mitochondria                      | 1.29E-02 | BCL2L1,CCND1,EP300,KRT8 | 4 |

|                                           |                                 |                                            |          |                                                                                                                                                  |    |
|-------------------------------------------|---------------------------------|--------------------------------------------|----------|--------------------------------------------------------------------------------------------------------------------------------------------------|----|
| Cellular Assembly and Organization        | size                            | size of mitochondria                       | 1.29E-02 | BCL2L1,CCND1,EP300,KRT8                                                                                                                          | 4  |
| Small Molecule Biochemistry               | synthesis                       | synthesis of glucocorticoid                | 1.29E-02 | ATP1A1,DIAPH1,DKK3,POMC                                                                                                                          | 4  |
| Endocrine System Development and Function | synthesis                       | synthesis of glucocorticoid                | 1.29E-02 | ATP1A1,DIAPH1,DKK3,POMC                                                                                                                          | 4  |
| Lipid Metabolism                          | synthesis                       | synthesis of glucocorticoid                | 1.29E-02 | ATP1A1,DIAPH1,DKK3,POMC                                                                                                                          | 4  |
| Vitamin and Mineral Metabolism            | synthesis                       | synthesis of glucocorticoid                | 1.29E-02 | ATP1A1,DIAPH1,DKK3,POMC                                                                                                                          | 4  |
| Cell Death and Survival                   | cell viability                  | cell viability of breast cancer cell lines | 1.30E-02 | AKT1,BCL2L1,CA2,CARD10,CASP3,CCND1,CTGF,EP300,ERBB2,MTHFR,NTN1,PBX1,PTPRE                                                                        | 13 |
| Molecular Transport                       | transport                       | transport of inorganic cation              | 1.32E-02 | ADORA1,AHCYL1,AKT1,ATP1A1,ATP1A2,ATP1B3,ATP2A2,ATP6V1G2,C16orf7,CA2,CACNB2,KCNJ5,KCNMB1,NEDD4L,NIPA2,NR3C2,NSF,PPP1R1A,SCN1B,SLC30A3,TRPC1,TRSC1 | 22 |
| Embryonic Development                     | patterning                      | patterning of rostrocaudal axis            | 1.42E-02 | HOXB2,HOXB6,PBX1,SFRP1,TCF15,TRSHZ1,VANGL2                                                                                                       | 7  |
| Organismal Development                    | patterning                      | patterning of rostrocaudal axis            | 1.42E-02 | HOXB2,HOXB6,PBX1,SFRP1,TCF15,TRSHZ1,VANGL2                                                                                                       | 7  |
| Cardiovascular Disease                    | essential hypertension          | essential hypertension                     | 1.53E-02 | CA2,CORIN,GUCY1A3,KCNJ5,NEDD4L,NR3C2                                                                                                             | 6  |
| Organismal Injury and Abnormalities       | hydrops fetalis                 | hydrops fetalis                            | 1.53E-02 | ADM,CCND1,ROR2,TAB1,TBX5,TSC1                                                                                                                    | 6  |
| Cell Cycle                                | interphase                      | initiation of interphase                   | 1.53E-02 | BAD,BCL2L1,CCND1,CDK4,EP300,NRIP1                                                                                                                | 6  |
| Inflammatory Disease                      | allergic pulmonary eosinophilia | allergic pulmonary eosinophilia            | 1.54E-02 | ALDH2,HNRNPAB,PRDX1,PRDX6,SELENBP1                                                                                                               | 5  |
| Inflammatory Response                     | allergic pulmonary eosinophilia | allergic pulmonary eosinophilia            | 1.54E-02 | ALDH2,HNRNPAB,PRDX1,PRDX6,SELENBP1                                                                                                               | 5  |
| Hematological Disease                     | allergic pulmonary eosinophilia | allergic pulmonary eosinophilia            | 1.54E-02 | ALDH2,HNRNPAB,PRDX1,PRDX6,SELENBP1                                                                                                               | 5  |
| Immunological Disease                     | allergic pulmonary              | allergic pulmonary                         | 1.54E-02 | ALDH2,HNRNPAB,PRDX1,PRDX6,SELENBP1                                                                                                               | 5  |

|                             |                                 |                                        |          |                                                                                                                                                                                                                                                                                                           |    |
|-----------------------------|---------------------------------|----------------------------------------|----------|-----------------------------------------------------------------------------------------------------------------------------------------------------------------------------------------------------------------------------------------------------------------------------------------------------------|----|
|                             | eosinophilia                    | eosinophilia                           |          | ENBP1                                                                                                                                                                                                                                                                                                     |    |
| Respiratory Disease         | allergic pulmonary eosinophilia | allergic pulmonary eosinophilia        | 1.54E-02 | ALDH2,HNRNPAB, PRDX1,PRDX6,SEL ENBP1                                                                                                                                                                                                                                                                      | 5  |
| Cancer                      | metastasis                      | metastasis of breast cancer cell lines | 1.54E-02 | AKT1,CD151,ERBB2,NME1,SEMA4D                                                                                                                                                                                                                                                                              | 5  |
| Reproductive System Disease | metastasis                      | metastasis of breast cancer cell lines | 1.54E-02 | AKT1,CD151,ERBB2,NME1,SEMA4D                                                                                                                                                                                                                                                                              | 5  |
| Cancer                      | morphology                      | morphology of tumor                    | 1.54E-02 | ERBB2,PRDX1,PTPRE,THBS1,TSC1                                                                                                                                                                                                                                                                              | 5  |
| Tumor Morphology            | morphology                      | morphology of tumor                    | 1.54E-02 | ERBB2,PRDX1,PTPRE,THBS1,TSC1                                                                                                                                                                                                                                                                              | 5  |
| Cardiovascular Disease      | atrial fibrillation             | atrial fibrillation                    | 1.57E-02 | ATP1A1,ATP1A2,ATP2A2,GJA5,KCNJ5,KCNMB1,NPPB,NR3C2                                                                                                                                                                                                                                                         | 8  |
| Hereditary Disorder         | Huntington's disease            | Huntington's Disease                   | 1.58E-02 | ADORA2A,AGXT2L1,AHCYL1,AKT1,ALDH2,ATP2A2,B3GNT1,B4GALT5,BCL2L1,CA2,CASP3,CASP9,CIRBP,CTGF,CYFIP2,DDIT3,DKK3,DISP5,EML1,EPHA4,FDFT1,GADD45A,GRIN2C,GYPC,HINT1,INPP1,MBTPS1,MPDZ,MT1X,NAP1L5,NME1,PGAM2,PPP1CB,PPP1R1A,PPRC1,PRDX6,RANBP1,RAP1GAP,RARB,REV1,RPS6KA5,SCN1B,SLC27A1,SRM,TESC,TUBA1A,UCK2,VCAN | 48 |
| Neurological Disease        | Huntington's disease            | Huntington's Disease                   | 1.58E-02 | ADORA2A,AGXT2L1,AHCYL1,AKT1,ALDH2,ATP2A2,B3GNT1,B4GALT5,BCL2L1,CA2,CASP3,CASP9,CIRBP,CTGF,CYFIP2,DDIT3,DKK3,DISP5,EML1,EPHA4,FDFT1,GADD45A,GRIN2C,GYPC,HINT1,INPP1,MBTPS1,MPDZ,MT1X,NAP1L5,NME1,PGAM2,PPP1CB,PPP1R1A,PPRC1,PRDX6,RANBP1,RAP1GAP,RARB,REV1,RPS6KA5,                                        | 48 |

|                                 |                           |                           |          |                                                                                                                                                                                                                                                                                                          |    |
|---------------------------------|---------------------------|---------------------------|----------|----------------------------------------------------------------------------------------------------------------------------------------------------------------------------------------------------------------------------------------------------------------------------------------------------------|----|
|                                 |                           |                           |          | SCN1B,SLC27A1,SRM,TESC,TUBA1A,UCK2,VCAN                                                                                                                                                                                                                                                                  |    |
| Skeletal and Muscular Disorders | Huntington's disease      | Huntington's Disease      | 1.58E-02 | ADORA2A,AGXT2L1,AHCYL1,AKT1,ALDH2,ATP2A2,B3GNT1,B4GALT5,BCL2L1,CA2,CASP3,CASP9,CIRBP,CTGF,CYFIP2,DDIT3,DKK3,USP5,EML1,EPHA4,FDFT1,GADD45A,GRIN2C,GYPC,HINT1,INPP1,MBTPS1,MPDZ,MT1X,NAP1L5,NME1,PGAM2,PPP1CB,PPP1R1A,PPRC1,PRDX6,RANBP1,RAP1GAP,RARB,REV1,RPS6KA5,SCN1B,SLC27A1,SRM,TESC,TUBA1A,UCK2,VCAN | 48 |
| Molecular Transport             | localization              | localization of protein   | 1.61E-02 | ADM,AKAP7,AKT1,ARHGDI1A,CASP3,COLQ,FCGR2A,GRIN2C,ICMT,LRBA,MT HFR,THBS1,TIAM2,ULK1                                                                                                                                                                                                                       | 14 |
| Protein Synthesis               | localization              | localization of protein   | 1.61E-02 | ADM,AKAP7,AKT1,ARHGDI1A,CASP3,COLQ,FCGR2A,GRIN2C,ICMT,LRBA,MT HFR,THBS1,TIAM2,ULK1                                                                                                                                                                                                                       | 14 |
| Protein Trafficking             | localization              | localization of protein   | 1.61E-02 | ADM,AKAP7,AKT1,ARHGDI1A,CASP3,COLQ,FCGR2A,GRIN2C,ICMT,LRBA,MT HFR,THBS1,TIAM2,ULK1                                                                                                                                                                                                                       | 14 |
| Cardiovascular Disease          | ventricular septal defect | ventricular septal defect | 1.65E-02 | ATP2A2,CDK4,GATA4,GJA5,HEG1,PBX1,RARB,RXRA,TBX5,TEAD2                                                                                                                                                                                                                                                    | 10 |
| Molecular Transport             | transport                 | transport of cation       | 1.73E-02 | ADORA1,AHCYL1,AKT1,ATP1A1,ATP1A2,ATP1B3,ATP2A2,ATP6V1G2,C16orf7,CA2,CACNB2,GRIN2C,KCNJ5,KCNMB1,NEDD4L,NIPA2,NR3C2,NSF,PPP1R1A,SCN1B,SLC30A3,TRPC1,TSC1                                                                                                                                                   | 23 |

|                                           |                    |                                 |          |                                                                                                                                                                                                                                                                                                                                                                                                 |    |
|-------------------------------------------|--------------------|---------------------------------|----------|-------------------------------------------------------------------------------------------------------------------------------------------------------------------------------------------------------------------------------------------------------------------------------------------------------------------------------------------------------------------------------------------------|----|
| Cellular Function and Maintenance         | formation          | formation of cilia              | 1.79E-02 | BBS1,BBS4,ODF2,PCM1,RANBP1,TM<br>EM67,VANGL2                                                                                                                                                                                                                                                                                                                                                    | 7  |
| Cell Morphology                           | formation          | formation of cilia              | 1.79E-02 | BBS1,BBS4,ODF2,PCM1,RANBP1,TM<br>EM67,VANGL2                                                                                                                                                                                                                                                                                                                                                    | 7  |
| Cellular Assembly and Organization        | formation          | formation of cilia              | 1.79E-02 | BBS1,BBS4,ODF2,PCM1,RANBP1,TM<br>EM67,VANGL2                                                                                                                                                                                                                                                                                                                                                    | 7  |
| Tissue Morphology                         | quantity           | quantity of endocrine cells     | 1.79E-02 | AKT1,BAD,CDK4,D<br>ACH1,FSTL3,NTN1,<br>POMC                                                                                                                                                                                                                                                                                                                                                     | 7  |
| Endocrine System Development and Function | quantity           | quantity of endocrine cells     | 1.79E-02 | AKT1,BAD,CDK4,D<br>ACH1,FSTL3,NTN1,<br>POMC                                                                                                                                                                                                                                                                                                                                                     | 7  |
| Neurological Disease                      | neurological signs | neurological signs              | 1.89E-02 | ADCY1,ADORA2A,<br>AGXT2L1,AHCYL1,<br>AKT1,ALDH2,ATP2<br>A2,B3GNT1,B4GAL<br>T5,BCL2L1,CA2,CA<br>SP3,CASP9,CIRBP,<br>CTGF,CYFIP2,DDIT<br>3,DKK3,DUSP5,EM<br>L1,EPHA4,FDFT1,G<br>ADD45A,GRIN2C,G<br>YPC,HINT1,INPP1,<br>MBTPS1,MPDZ,MT<br>1X,NAP1L5,NME1,P<br>GAM2,PPP1CB,PP<br>P1R1A,PPRC1,PRD<br>X6,RANBP1,RAP1G<br>AP,RARB,REV1,RP<br>S6KA5,SCN1B,SLC<br>27A1,SRM,TESC,T<br>UBA1A,UCK2,VCA<br>N | 49 |
| Cell Death and Survival                   | apoptosis          | apoptosis of kidney cells       | 1.92E-02 | ADORA1,ATP1A1,C<br>ASP3,CTGF,DDIT3,<br>GFPT1,NTN1,SLK                                                                                                                                                                                                                                                                                                                                           | 8  |
| Molecular Transport                       | transport          | transport of Na+                | 1.92E-02 | AHCYL1,AKT1,ATP<br>1A1,ATP1A2,ATP1B<br>3,NEDD4L,NR3C2,<br>SCN1B                                                                                                                                                                                                                                                                                                                                 | 8  |
| Tissue Development                        | adhesion           | adhesion of melanoma cell lines | 1.96E-02 | CD151,NME1,THBS<br>1,VCAN                                                                                                                                                                                                                                                                                                                                                                       | 4  |
| Cell-To-Cell Signaling and Interaction    | adhesion           | adhesion of melanoma cell lines | 1.96E-02 | CD151,NME1,THBS<br>1,VCAN                                                                                                                                                                                                                                                                                                                                                                       | 4  |
| Cancer                                    | gallbladder cancer | gallbladder cancer              | 1.96E-02 | CCND1,ERBB2,KE<br>AP1,POLE4                                                                                                                                                                                                                                                                                                                                                                     | 4  |
| Gastrointestinal Disease                  | gallbladder cancer | gallbladder cancer              | 1.96E-02 | CCND1,ERBB2,KE<br>AP1,POLE4                                                                                                                                                                                                                                                                                                                                                                     | 4  |
| Hepatic System                            | gallbladder        | gallbladder                     | 1.96E-02 | CCND1,ERBB2,KE                                                                                                                                                                                                                                                                                                                                                                                  | 4  |

|                                        |              |                               |          |                                                                                              |    |
|----------------------------------------|--------------|-------------------------------|----------|----------------------------------------------------------------------------------------------|----|
| Disease                                | cancer       | cancer                        |          | AP1,POLE4                                                                                    |    |
| Cancer                                 | mastocytosis | mastocytosis                  | 1.96E-02 | ATP1A1,ATP1A2,IL27RA,U2AF1                                                                   | 4  |
| Organismal Injury and Abnormalities    | mastocytosis | mastocytosis                  | 1.96E-02 | ATP1A1,ATP1A2,IL27RA,U2AF1                                                                   | 4  |
| Hematological Disease                  | mastocytosis | mastocytosis                  | 1.96E-02 | ATP1A1,ATP1A2,IL27RA,U2AF1                                                                   | 4  |
| Immunological Disease                  | mastocytosis | mastocytosis                  | 1.96E-02 | ATP1A1,ATP1A2,IL27RA,U2AF1                                                                   | 4  |
| Organ Morphology                       | morphology   | morphology of stratum corneum | 1.96E-02 | DSC1,ELOVL4,JUP,RXRA                                                                         | 4  |
| Hair and Skin Development and Function | morphology   | morphology of stratum corneum | 1.96E-02 | DSC1,ELOVL4,JUP,RXRA                                                                         | 4  |
| Reproductive System Disease            | sterility    | sterility                     | 1.96E-02 | CDK4,H2AFX,SBF1,STX2                                                                         | 4  |
| Molecular Transport                    | uptake       | uptake of Na+                 | 1.96E-02 | ADM,KRT8,NEDD4L,NR3C2                                                                        | 4  |
| Cellular Function and Maintenance      | uptake       | uptake of Na+                 | 1.96E-02 | ADM,KRT8,NEDD4L,NR3C2                                                                        | 4  |
| Embryonic Development                  | development  | skin development              | 1.98E-02 | AKT1,ATP2A2,CCND1,CTGF,DSP,EIF2C2,ELOVL4,EMP1,EPB49,JUP,KRT8,ARB,SOX18,TCF15,TNFRSF19,VANGL2 | 16 |
| Organ Development                      | development  | skin development              | 1.98E-02 | AKT1,ATP2A2,CCND1,CTGF,DSP,EIF2C2,ELOVL4,EMP1,EPB49,JUP,KRT8,ARB,SOX18,TCF15,TNFRSF19,VANGL2 | 16 |
| Organismal Development                 | development  | skin development              | 1.98E-02 | AKT1,ATP2A2,CCND1,CTGF,DSP,EIF2C2,ELOVL4,EMP1,EPB49,JUP,KRT8,ARB,SOX18,TCF15,TNFRSF19,VANGL2 | 16 |
| Tissue Development                     | development  | skin development              | 1.98E-02 | AKT1,ATP2A2,CCND1,CTGF,DSP,EIF2C2,ELOVL4,EMP1,EPB49,JUP,KRT8,ARB,SOX18,TCF15,TNFRSF19,VANGL2 | 16 |
| Hair and Skin Development and Function | development  | skin development              | 1.98E-02 | AKT1,ATP2A2,CCND1,CTGF,DSP,EIF2C2,ELOVL4,EMP1,                                               | 16 |

|                            |                 |                               |          |                                                                                                                                                                                                                                                                                                                                                                       |    |
|----------------------------|-----------------|-------------------------------|----------|-----------------------------------------------------------------------------------------------------------------------------------------------------------------------------------------------------------------------------------------------------------------------------------------------------------------------------------------------------------------------|----|
|                            |                 |                               |          | EPB49,JUP,KRT8,RARB,SOX18,TCF15,TNFRSF19,VANGL2                                                                                                                                                                                                                                                                                                                       |    |
| Cancer                     | thyroid cancer  | thyroid cancer                | 2.06E-02 | AKT1,BAD,CCND1,CDK4,ECM1,ERBB2,GOLGA5,ITGA5,LSM7,PCM1,RAP1GAP,RARB,SERPINF1,THBS1                                                                                                                                                                                                                                                                                     | 14 |
| Endocrine System Disorders | thyroid cancer  | thyroid cancer                | 2.06E-02 | AKT1,BAD,CCND1,CDK4,ECM1,ERBB2,GOLGA5,ITGA5,LSM7,PCM1,RAP1GAP,RARB,SERPINF1,THBS1                                                                                                                                                                                                                                                                                     | 14 |
| Cancer                     | neoplasia       | neoplasia of tumor cell lines | 2.06E-02 | ADAMTS9,AKT1,CASP3,CCND1,CD151,COL4A1,COPS6,DACH1,EPAS1,ERBB2,IL27RA,JUP,NME1,NOX4,PPAP2A,PRNP,SEMA4D,THBS1                                                                                                                                                                                                                                                           | 18 |
| Developmental Disorder     | Down's syndrome | Down's syndrome               | 2.09E-02 | ABCG1,CRELD1,DL1,GRIN2C,UBB                                                                                                                                                                                                                                                                                                                                           | 5  |
| Hereditary Disorder        | Down's syndrome | Down's syndrome               | 2.09E-02 | ABCG1,CRELD1,DL1,GRIN2C,UBB                                                                                                                                                                                                                                                                                                                                           | 5  |
| Cardiovascular Disease     | heart disease   | Heart Disease                 | 2.11E-02 | ADM,ADORA1,ADORA2A,AKT1,ATP1A1,ATP1A2,ATP2A2,BCL2L1,C6,C8orf34,CA2,CACNB2,CDK4,CDR2L,CORIN,CPEB3,CRELD1,CTGF,CTNNB1,DDIT3,DGCR8,DPCD,DSP,EP300,EPAS1,ERBB2,FBXO32,FSTL1,FSTL3,FXDY1,GAB2,GATA4,GFOD1,GJA5,GUCY1A3,HAND1,HEG1,ITGA5,JUP,KCNJ5,KCNMB1,LIMS1,MAPK1,MEF2D,MTPN,NOX4,NPBP,NR3C2,PBX1,PBX3,PDE7B,PPP1R1A,RARB,ROR2,RXRA,SCN1B,TBX5,TEAD2,THBS1,TRPC1,TUBA1A | 61 |
| Cellular Movement          | migration       | migration of myeloid cells    | 2.17E-02 | ADORA1,ADORA2A,ARHGAP1,DARC,JAM3,MYLK3,POMC,                                                                                                                                                                                                                                                                                                                          | 11 |

|                                                         |                     |                                          |          |                                                                     |    |
|---------------------------------------------------------|---------------------|------------------------------------------|----------|---------------------------------------------------------------------|----|
|                                                         |                     |                                          |          | PRNP,RTN4,SEMA4D,SWAP70                                             |    |
| Hematological System Development and Function           | migration           | migration of myeloid cells               | 2.17E-02 | ADORA1,ADORA2A,ARHGAP1,DARC,JAM3,MYLK3,POMC,PRNP,RTN4,SEMA4D,SWAP70 | 11 |
| Immune Cell Trafficking                                 | migration           | migration of myeloid cells               | 2.17E-02 | ADORA1,ADORA2A,ARHGAP1,DARC,JAM3,MYLK3,POMC,PRNP,RTN4,SEMA4D,SWAP70 | 11 |
| Cell Morphology                                         | collapse            | collapse of growth cone                  | 2.22E-02 | EPHA4,ERBB2,NTN1,PLXNB1,RRAS,RTN4,SEMA4D                            | 7  |
| Cellular Compromise                                     | collapse            | collapse of growth cone                  | 2.22E-02 | EPHA4,ERBB2,NTN1,PLXNB1,RRAS,RTN4,SEMA4D                            | 7  |
| Connective Tissue Development and Function              | abnormal morphology | abnormal morphology of malleus           | 2.23E-02 | PBX1,ROR2,TSHZ1                                                     | 3  |
| Embryonic Development                                   | abnormal morphology | abnormal morphology of malleus           | 2.23E-02 | PBX1,ROR2,TSHZ1                                                     | 3  |
| Organ Development                                       | abnormal morphology | abnormal morphology of malleus           | 2.23E-02 | PBX1,ROR2,TSHZ1                                                     | 3  |
| Organ Morphology                                        | abnormal morphology | abnormal morphology of malleus           | 2.23E-02 | PBX1,ROR2,TSHZ1                                                     | 3  |
| Organismal Development                                  | abnormal morphology | abnormal morphology of malleus           | 2.23E-02 | PBX1,ROR2,TSHZ1                                                     | 3  |
| Skeletal and Muscular System Development and Function   | abnormal morphology | abnormal morphology of malleus           | 2.23E-02 | PBX1,ROR2,TSHZ1                                                     | 3  |
| Tissue Development                                      | abnormal morphology | abnormal morphology of malleus           | 2.23E-02 | PBX1,ROR2,TSHZ1                                                     | 3  |
| Auditory and Vestibular System Development and Function | abnormal morphology | abnormal morphology of malleus           | 2.23E-02 | PBX1,ROR2,TSHZ1                                                     | 3  |
| Tissue Morphology                                       | abnormal morphology | abnormal morphology of paraxial mesoderm | 2.23E-02 | ITGA5,TCF15,TEAD2                                                   | 3  |
| Embryonic Development                                   | abnormal morphology | abnormal morphology of paraxial mesoderm | 2.23E-02 | ITGA5,TCF15,TEAD2                                                   | 3  |

|                                                |                    |                                                  |          |                                              |   |
|------------------------------------------------|--------------------|--------------------------------------------------|----------|----------------------------------------------|---|
| Behavior                                       | addiction behavior | addiction behavior                               | 2.23E-02 | ADORA2A,ATP1A1, POMC                         | 3 |
| Cell-To-Cell Signaling and Interaction         | binding            | binding of mast cells                            | 2.23E-02 | AKT1,DLL1,ITGA5                              | 3 |
| Hematological System Development and Function  | binding            | binding of mast cells                            | 2.23E-02 | AKT1,DLL1,ITGA5                              | 3 |
| Inflammatory Response                          | binding            | binding of mast cells                            | 2.23E-02 | AKT1,DLL1,ITGA5                              | 3 |
| Hypersensitivity Response                      | binding            | binding of mast cells                            | 2.23E-02 | AKT1,DLL1,ITGA5                              | 3 |
| Molecular Transport                            | flux               | flux of K+                                       | 2.23E-02 | BCL2L1,MAPK1,NR3C2                           | 3 |
| Cellular Function and Maintenance              | flux               | flux of K+                                       | 2.23E-02 | BCL2L1,MAPK1,NR3C2                           | 3 |
| Cell Cycle                                     | interphase         | interphase of hepatoma cell lines                | 2.23E-02 | DDIT3,E2F5,PBX1                              | 3 |
| Hematological Disease                          | microcytosis       | microcytosis                                     | 2.23E-02 | EPB49,FBXL5,PRDX1                            | 3 |
| Gastrointestinal Disease                       | nausea             | nausea                                           | 2.23E-02 | ATP1A1,ATP1A2,GRIN2C                         | 3 |
| Cell Morphology                                | permeabilization   | permeabilization of mitochondrial outer membrane | 2.23E-02 | BAD,BCL2L1,ITSN1                             | 3 |
| Organ Development                              | recovery           | recovery of heart                                | 2.23E-02 | ADORA1,AKT1,PPP1R1A                          | 3 |
| Cardiovascular System Development and Function | recovery           | recovery of heart                                | 2.23E-02 | ADORA1,AKT1,PPP1R1A                          | 3 |
| Cell Morphology                                | size               | size of hematopoietic progenitor cells           | 2.23E-02 | AKT1,CCND1,CDK4                              | 3 |
| Hematopoiesis                                  | size               | size of hematopoietic progenitor cells           | 2.23E-02 | AKT1,CCND1,CDK4                              | 3 |
| Cancer                                         | transformation     | transformation of tumor cells                    | 2.23E-02 | ERBB2,PTPRE,SFRP1                            | 3 |
| Tumor Morphology                               | transformation     | transformation of tumor cells                    | 2.23E-02 | ERBB2,PTPRE,SFRP1                            | 3 |
| Connective Tissue Development and Function     | patterning         | patterning of axis                               | 2.31E-02 | GATA4,ITGA5,MAPK1,PBX1,SFRP1,SFRP5,TCF15,WLS | 8 |
| Embryonic Development                          | patterning         | patterning of axis                               | 2.31E-02 | GATA4,ITGA5,MAPK1,PBX1,SFRP1,SFRP5,TCF15,WLS | 8 |
| Skeletal and Muscular System Development       | patterning         | patterning of axis                               | 2.31E-02 | GATA4,ITGA5,MAPK1,PBX1,SFRP1,SFRP5,TCF15,WLS | 8 |

|                                                       |                     |                                       |          |                                                                                                                                                                                                                                                                                                                                                                                                                                                                                                       |     |
|-------------------------------------------------------|---------------------|---------------------------------------|----------|-------------------------------------------------------------------------------------------------------------------------------------------------------------------------------------------------------------------------------------------------------------------------------------------------------------------------------------------------------------------------------------------------------------------------------------------------------------------------------------------------------|-----|
| and Function                                          |                     |                                       |          |                                                                                                                                                                                                                                                                                                                                                                                                                                                                                                       |     |
| Tissue Development                                    | patterning          | patterning of axis                    | 2.31E-02 | GATA4,ITGA5,MAPK1,PBX1,SFRP1,SFRP5,TCF15,WLS                                                                                                                                                                                                                                                                                                                                                                                                                                                          | 8   |
| Free Radical Scavenging                               | generation          | generation of reactive oxygen species | 2.50E-02 | ALDH2,BCL2L1,CASP3,CYP1B1,EPAS1,ITSN1,MAPK1,NOX4,NOXA1,NR3C2,POMC,PTPN1,SERPINF1                                                                                                                                                                                                                                                                                                                                                                                                                      | 13  |
| Skeletal and Muscular System Development and Function | morphology          | morphology of skeleton                | 2.51E-02 | CTGF,FSTL1,HEXB,HOXB6,ITGB1BP1,PBX1,PKDCC,PTPRE,RARB,ROR2,RXRA,SAFB,SMARCAL1,TASP1,TCF15,TEAD2,THBS1,TSHZ1                                                                                                                                                                                                                                                                                                                                                                                            | 18  |
| Organismal Injury and Abnormalities                   | cerebral hemorrhage | cerebral hemorrhage                   | 2.52E-02 | ADORA1,ADORA2A,CASP9,CBFB,E2F5,JAM3                                                                                                                                                                                                                                                                                                                                                                                                                                                                   | 6   |
| Neurological Disease                                  | cerebral hemorrhage | cerebral hemorrhage                   | 2.52E-02 | ADORA1,ADORA2A,CASP9,CBFB,E2F5,JAM3                                                                                                                                                                                                                                                                                                                                                                                                                                                                   | 6   |
| Cellular Growth and Proliferation                     | proliferation       | proliferation of cells                | 2.64E-02 | ABCG1,ACLY,ACTN1,ADCY1,ADM,ADORA1,ADORA2A,AES,AKT1,ANKRD6,AQP7,ARFGAP3,ARHGAP1,ARHGAP24,ARHGDIA,ARID1A,ATP2A2,BAD,BCL2L1,CALCOCO2,CALM1 (includes others),CARD10,CASP3,CASP9,CBFB,CCND1,CD151,CDCA7L,CDK20,CDK4,CDK9,CES2,CIRBP,COL4A1,COPS6,CRIP2,CRLF1,CSNK1D,CSPG4,CTDSPL,CTGF,CYP1B1,CYP20A1,DACH1,DAPK2,DDIT3,DDX21,DGCR8,DIAPH1,DKK3,DLL1,DSP,DUSP5,E2F5,ECM1,EEF2K,EGLN2,EIF2C2,EMP1,EP300,EPAS1,ERBB2,EXTL3,FANCL,FBXW4,FDFT1,FEN1,FSTL3,FXYD1,GAB2,GADD45A,GATA4,GJA5,GNL3,GOLPH3,GPNMB,GRIN | 197 |

|                       |             |                          |          |                                                                                                                                                                                                                                                                                                                                                                                                                                                                                                                                                                                                                                                                                                                                                           |   |
|-----------------------|-------------|--------------------------|----------|-----------------------------------------------------------------------------------------------------------------------------------------------------------------------------------------------------------------------------------------------------------------------------------------------------------------------------------------------------------------------------------------------------------------------------------------------------------------------------------------------------------------------------------------------------------------------------------------------------------------------------------------------------------------------------------------------------------------------------------------------------------|---|
|                       |             |                          |          | 2C,H2AFX,H2AFY, HAND1,HEXB,HINT1,HNRNPAB,ICMT,IFNAR2,IL27RA,IL32,ITGA5,ITSN1,JUP,KCNJ5,KDM3B,KRT8,LEPREL1,LIMS1,L MNB2,LRRC32,MAPK1,MAPRE2,MCM3,MED25,MED28,MP11,MTA1,MTAP,MTPN,MYLK,NACA,NEU1,NME1,NOA1,NOX4,NPDC1,NPPB,NR2F1,NR3C2,NRIP1,NTN1,NUDCD3,OSR1,PBX1,PBX3,PCYOX1,PGAM2,PHLDA1,PIP5K1C,PLCG2,PLXNB1,POLM,POMC,PPRC1,PRCC,PRDX1,PRNP,PTPN1,PTPRE,QPCT,RAP1GAP,RARB,RBFOX2,RBM38,RDBP,RFC1,RMI1,RNF187,ROR2,RPL26,RPS6KA2,RPS6KA5,RRAS,RXRA,SAFB,SBF1,SCAF11,SELENBP1,SEMA4D,SEMA6A,SERPINF1,SERPINH1,SFRP1,SFRP5,SGPL1,SHMT2,SLC29A1,SLK,SMARCAL1,SOX18,SOX7,SP2,STAU1,STEAP2,STX2,SWAP70,TADA3,TASP1,TBC1D8,TBX5,TEAD2,TESC,TFG,THBS1,THBS4,TIAM2,TNFAIP3,TNFAIP6,TNFRSF19,TOPORS,TP53I11,TRPC1,TSC1,TSPAN32,URGCP,URI1,VASH1,VCAN,ZNF512B,ZYX |   |
| Embryonic Development | development | development of inner ear | 2.71E-02 | DLL1,MCOLN3,NR2F1,NTN1,ROR2,SIX4,VANGL2                                                                                                                                                                                                                                                                                                                                                                                                                                                                                                                                                                                                                                                                                                                   | 7 |
| Organ Development     | development | development of inner ear | 2.71E-02 | DLL1,MCOLN3,NR2F1,NTN1,ROR2,SIX4,VANGL2                                                                                                                                                                                                                                                                                                                                                                                                                                                                                                                                                                                                                                                                                                                   | 7 |
| Organismal            | development | development of           | 2.71E-02 | DLL1,MCOLN3,NR2                                                                                                                                                                                                                                                                                                                                                                                                                                                                                                                                                                                                                                                                                                                                           | 7 |

|                                                         |                                            |                                            |          |                                                                                                    |    |
|---------------------------------------------------------|--------------------------------------------|--------------------------------------------|----------|----------------------------------------------------------------------------------------------------|----|
| Development                                             |                                            | inner ear                                  |          | F1,NTN1,ROR2,SIX4,VANGL2                                                                           |    |
| Tissue Development                                      | development                                | development of inner ear                   | 2.71E-02 | DLL1,MCOLN3,NR2F1,NTN1,ROR2,SIX4,VANGL2                                                            | 7  |
| Auditory and Vestibular System Development and Function | development                                | development of inner ear                   | 2.71E-02 | DLL1,MCOLN3,NR2F1,NTN1,ROR2,SIX4,VANGL2                                                            | 7  |
| Cancer                                                  | hyperplasia                                | hyperplasia of cells                       | 2.74E-02 | AKT1,CASP3,CASP9,CDK4,DSC1,ERBB2,FSTL3,GADD45A,IL27RA,KRT8,LIMS1,MTA1,PTPN1,RNF187,RXRA,SAFB,THBS1 | 17 |
| Cell Cycle                                              | S phase                                    | initiation of S phase                      | 2.77E-02 | BCL2L1,CCND1,CDK4,EP300,NRIP1                                                                      | 5  |
| Nervous System Development and Function                 | miniature excitatory postsynaptic currents | miniature excitatory postsynaptic currents | 2.77E-02 | CPLX3,EPHA4,GRI N2C,PIP5K1C,SLC29A1                                                                | 5  |
| Cell-To-Cell Signaling and Interaction                  | miniature excitatory postsynaptic currents | miniature excitatory postsynaptic currents | 2.77E-02 | CPLX3,EPHA4,GRI N2C,PIP5K1C,SLC29A1                                                                | 5  |
| Cell Death and Survival                                 | apoptosis                                  | apoptosis of endocrine cell lines          | 2.81E-02 | AKT1,CASP3,CCND1,PRDX1                                                                             | 4  |
| Tissue Development                                      | formation                                  | formation of basement membrane             | 2.81E-02 | ADM,COL4A1,CTGF,SERPINH1                                                                           | 4  |
| Small Molecule Biochemistry                             | synthesis                                  | synthesis of aldosterone                   | 2.81E-02 | DKK3,KCNJ5,NR2F1,POMC                                                                              | 4  |
| Endocrine System Development and Function               | synthesis                                  | synthesis of aldosterone                   | 2.81E-02 | DKK3,KCNJ5,NR2F1,POMC                                                                              | 4  |
| Lipid Metabolism                                        | synthesis                                  | synthesis of aldosterone                   | 2.81E-02 | DKK3,KCNJ5,NR2F1,POMC                                                                              | 4  |
| Vitamin and Mineral Metabolism                          | synthesis                                  | synthesis of aldosterone                   | 2.81E-02 | DKK3,KCNJ5,NR2F1,POMC                                                                              | 4  |
| Tissue Morphology                                       | transformation                             | transformation of thoracic vertebra        | 2.81E-02 | HOXB6,RARB,TASP1,TSHZ1                                                                             | 4  |
| Cancer                                                  | transformation                             | transformation of thoracic vertebra        | 2.81E-02 | HOXB6,RARB,TASP1,TSHZ1                                                                             | 4  |
| Skeletal and Muscular Disorders                         | transformation                             | transformation of thoracic vertebra        | 2.81E-02 | HOXB6,RARB,TASP1,TSHZ1                                                                             | 4  |
| Cellular Movement                                       | cell movement                              | cell movement of phagocytes                | 2.94E-02 | ADM,ADORA1,ADORA2A,ANGPTL2,AR                                                                      | 32 |

|                                               |               |                             |          |                                                                                                                                                                                                             |    |
|-----------------------------------------------|---------------|-----------------------------|----------|-------------------------------------------------------------------------------------------------------------------------------------------------------------------------------------------------------------|----|
|                                               |               |                             |          | HGAP1,C6,CAMK1 D,CCND1,CD151,C OL4A1,CTGF,DARC ,EPAS1,ERBB2,FC GR2A,ITGA5,JAM3, MYLK,MYLK3,NR3 C2,NTN1,PIP5K1C, PRNP,QPCT,RTN4, SEMA4D,SFRP1,S WAP70,THBS1,THB S4,TNFAIP3,TSC1                              |    |
| Hematological System Development and Function | cell movement | cell movement of phagocytes | 2.94E-02 | ADM,ADORA1,ADORA2A,ANGPTL2,ARHGAP1,C6,CAMK1 D,CCND1,CD151,C OL4A1,CTGF,DARC ,EPAS1,ERBB2,FC GR2A,ITGA5,JAM3, MYLK,MYLK3,NR3 C2,NTN1,PIP5K1C, PRNP,QPCT,RTN4, SEMA4D,SFRP1,S WAP70,THBS1,THB S4,TNFAIP3,TSC1 | 32 |
| Immune Cell Trafficking                       | cell movement | cell movement of phagocytes | 2.94E-02 | ADM,ADORA1,ADORA2A,ANGPTL2,ARHGAP1,C6,CAMK1 D,CCND1,CD151,C OL4A1,CTGF,DARC ,EPAS1,ERBB2,FC GR2A,ITGA5,JAM3, MYLK,MYLK3,NR3 C2,NTN1,PIP5K1C, PRNP,QPCT,RTN4, SEMA4D,SFRP1,S WAP70,THBS1,THB S4,TNFAIP3,TSC1 | 32 |
| Inflammatory Response                         | cell movement | cell movement of phagocytes | 2.94E-02 | ADM,ADORA1,ADORA2A,ANGPTL2,ARHGAP1,C6,CAMK1 D,CCND1,CD151,C OL4A1,CTGF,DARC ,EPAS1,ERBB2,FC GR2A,ITGA5,JAM3, MYLK,MYLK3,NR3 C2,NTN1,PIP5K1C, PRNP,QPCT,RTN4, SEMA4D,SFRP1,S WAP70,THBS1,THB S4,TNFAIP3,TSC1 | 32 |
| Cell Morphology                               | contraction   | contraction of cells        | 3.16E-02 | ADM,ATP2A2,CASP3,CASP9,ITGA5,MYLK,PLXNB1,RND2, SEMA4D                                                                                                                                                       | 9  |
| Hematological System                          | circulation   | circulation of blood        | 3.26E-02 | ADM,ADORA2A,ERBB2,GUCY1A3,HO                                                                                                                                                                                | 8  |

|                                                |                         |                                    |          |                                                                                                                            |    |
|------------------------------------------------|-------------------------|------------------------------------|----------|----------------------------------------------------------------------------------------------------------------------------|----|
| Development and Function                       |                         |                                    |          | XB2,JUP,MTHFR,TBC1D8                                                                                                       |    |
| Cellular Development                           | immortalization         | immortalization                    | 3.26E-02 | CCND1,CDK4,ERBB2,HINT1,HOXB6,PBX1,PGAM2,SAFB                                                                               | 8  |
| Organ Morphology                               | morphology              | morphology of ventricular septum   | 3.26E-02 | ADM,ATP2A2,CCND1,GATA4,RXRA,TAB1,TBX5,THBS1                                                                                | 8  |
| Cardiovascular System Development and Function | morphology              | morphology of ventricular septum   | 3.26E-02 | ADM,ATP2A2,CCND1,GATA4,RXRA,TAB1,TBX5,THBS1                                                                                | 8  |
| Molecular Transport                            | transport               | transport of metal ion             | 3.27E-02 | ADORA1,AHCYL1,AKT1,ATP1A1,ATP1A2,ATP1B3,ATP2A2,CACNB2,KCNJ5,KCNMB1,NEDD4L,NIPPA2,NR3C2,NSF,PP1R1A,SCN1B,SLC30A3,TRPC1,TSC1 | 19 |
| Embryonic Development                          | fertilization           | fertilization                      | 3.27E-02 | ARHGDI1A,BBS1,BCL2L1,CLGN,HEXB,PRNP,TNFAIP6                                                                                | 7  |
| Organismal Development                         | fertilization           | fertilization                      | 3.27E-02 | ARHGDI1A,BBS1,BCL2L1,CLGN,HEXB,PRNP,TNFAIP6                                                                                | 7  |
| Reproductive System Development and Function   | fertilization           | fertilization                      | 3.27E-02 | ARHGDI1A,BBS1,BCL2L1,CLGN,HEXB,PRNP,TNFAIP6                                                                                | 7  |
| Organismal Injury and Abnormalities            | intracranial hemorrhage | intracranial hemorrhage            | 3.27E-02 | ADORA1,ADORA2A,CASP9,CBFB,E2F5,JAM3,NPPB                                                                                   | 7  |
| Cancer                                         | papillary carcinoma     | papillary carcinoma                | 3.46E-02 | AKT1,BAD,GOLGA5,ITGA5,LSM7,PCM1,PRCC,RAP1GAP,SFRP1,THBS1                                                                   | 10 |
| Reproductive System Development and Function   | G1 phase                | G1 phase of breast cell lines      | 3.56E-02 | EP300,ERBB2                                                                                                                | 2  |
| Cell Cycle                                     | G1 phase                | G1 phase of breast cell lines      | 3.56E-02 | EP300,ERBB2                                                                                                                | 2  |
| Hereditary Disorder                            | Netherton syndrome      | Netherton syndrome                 | 3.56E-02 | DSC1,DSP                                                                                                                   | 2  |
| Dermatological Diseases and Conditions         | Netherton syndrome      | Netherton syndrome                 | 3.56E-02 | DSC1,DSP                                                                                                                   | 2  |
| Cell Cycle                                     | S phase                 | S phase of hepatoma cell lines     | 3.56E-02 | E2F5,PBX1                                                                                                                  | 2  |
| Connective Tissue Development                  | abnormal morphology     | abnormal morphology of bent fibula | 3.56E-02 | CTGF,FSTL1                                                                                                                 | 2  |

|                                                       |                     |                                                    |          |               |   |
|-------------------------------------------------------|---------------------|----------------------------------------------------|----------|---------------|---|
| and Function                                          |                     |                                                    |          |               |   |
| Embryonic Development                                 | abnormal morphology | abnormal morphology of bent fibula                 | 3.56E-02 | CTGF,FSTL1    | 2 |
| Organ Development                                     | abnormal morphology | abnormal morphology of bent fibula                 | 3.56E-02 | CTGF,FSTL1    | 2 |
| Organ Morphology                                      | abnormal morphology | abnormal morphology of bent fibula                 | 3.56E-02 | CTGF,FSTL1    | 2 |
| Organismal Development                                | abnormal morphology | abnormal morphology of bent fibula                 | 3.56E-02 | CTGF,FSTL1    | 2 |
| Skeletal and Muscular System Development and Function | abnormal morphology | abnormal morphology of bent fibula                 | 3.56E-02 | CTGF,FSTL1    | 2 |
| Tissue Development                                    | abnormal morphology | abnormal morphology of bent fibula                 | 3.56E-02 | CTGF,FSTL1    | 2 |
| Organ Morphology                                      | abnormal morphology | abnormal morphology of geniculate ganglion         | 3.56E-02 | ERBB2,HOXB2   | 2 |
| Nervous System Development and Function               | abnormal morphology | abnormal morphology of geniculate ganglion         | 3.56E-02 | ERBB2,HOXB2   | 2 |
| Tissue Morphology                                     | abnormal morphology | abnormal morphology of nasal capsule               | 3.56E-02 | CTGF,ROR2     | 2 |
| Gastrointestinal Disease                              | achlorhydria        | achlorhydria                                       | 3.56E-02 | ATP1A1,ATP1A2 | 2 |
| Dermatological Diseases and Conditions                | acne vulgaris       | acne vulgaris                                      | 3.56E-02 | RARB,RXRA     | 2 |
| Inflammatory Disease                                  | acne vulgaris       | acne vulgaris                                      | 3.56E-02 | RARB,RXRA     | 2 |
| Cancer                                                | activation          | activation of chronic lymphocytic leukemia B cells | 3.56E-02 | PLXNB1,SEMA4D | 2 |
| Cell-To-Cell Signaling and Interaction                | activation          | activation of chronic lymphocytic leukemia B cells | 3.56E-02 | PLXNB1,SEMA4D | 2 |
| Tissue Development                                    | adhesion            | adhesion of fibrosarcoma cell lines                | 3.56E-02 | ITGA5,JAM3    | 2 |
| Cell-To-Cell Signaling and Interaction                | adhesion            | adhesion of fibrosarcoma cell lines                | 3.56E-02 | ITGA5,JAM3    | 2 |
| Cell Death and Survival                               | anoikis             | anoikis of RPE cells                               | 3.56E-02 | BCL2L1,MAPK1  | 2 |

|                                        |                                                     |                                                              |          |                |   |
|----------------------------------------|-----------------------------------------------------|--------------------------------------------------------------|----------|----------------|---|
| Cell Death and Survival                | antibody-dependent cell-mediated cytotoxic reaction | antibody-dependent cell-mediated cytotoxic reaction of cells | 3.56E-02 | ERBB2,FCGR2A   | 2 |
| Inflammatory Response                  | antibody-dependent cell-mediated cytotoxic reaction | antibody-dependent cell-mediated cytotoxic reaction of cells | 3.56E-02 | ERBB2,FCGR2A   | 2 |
| Cell Death and Survival                | apoptosis                                           | apoptosis of embryonal carcinoma cell                        | 3.56E-02 | AKT1,GAB2      | 2 |
| Tumor Morphology                       | apoptosis                                           | apoptosis of embryonal carcinoma cell                        | 3.56E-02 | AKT1,GAB2      | 2 |
| Cell Death and Survival                | apoptosis                                           | apoptosis of eye cell lines                                  | 3.56E-02 | MAPK1,SERPINF1 | 2 |
| Cell Death and Survival                | apoptosis                                           | apoptosis of osteocytes                                      | 3.56E-02 | MAPK1,RPS6KA2  | 2 |
| Cell Cycle                             | G2 phase                                            | arrest in G2 phase of blood cells                            | 3.56E-02 | E2F5,GADD45A   | 2 |
| Organismal Injury and Abnormalities    | atrophy                                             | atrophy of myotube                                           | 3.56E-02 | EP300,FBXO32   | 2 |
| Cellular Compromise                    | atrophy                                             | atrophy of myotube                                           | 3.56E-02 | EP300,FBXO32   | 2 |
| Cell-To-Cell Signaling and Interaction | binding                                             | binding of lung cancer cell lines                            | 3.56E-02 | FCGR2A,JAM3    | 2 |
| Cellular Assembly and Organization     | binding                                             | binding of mitochondrial membrane                            | 3.56E-02 | BAD,BCL2L1     | 2 |
| Cell Morphology                        | cell spreading                                      | cell spreading of melanoma cell lines                        | 3.56E-02 | PRNP,THBS1     | 2 |
| Hereditary Disorder                    | childhood absence epilepsy                          | childhood absence epilepsy                                   | 3.56E-02 | ATP1A2,SCN1B   | 2 |
| Neurological Disease                   | childhood absence epilepsy                          | childhood absence epilepsy                                   | 3.56E-02 | ATP1A2,SCN1B   | 2 |
| Cellular Growth and Proliferation      | cloning                                             | cloning of cells                                             | 3.56E-02 | CCND1,PHLDA1   | 2 |
| Nucleic Acid Metabolism                | concentration                                       | concentration of acetyl-coenzyme A                           | 3.56E-02 | ACLY,BCL2L1    | 2 |
| Small Molecule Biochemistry            | concentration                                       | concentration of acetyl-coenzyme A                           | 3.56E-02 | ACLY,BCL2L1    | 2 |
| Molecular Transport                    | concentration                                       | concentration of acetyl-coenzyme A                           | 3.56E-02 | ACLY,BCL2L1    | 2 |

|                                                         |               |                                         |          |              |   |
|---------------------------------------------------------|---------------|-----------------------------------------|----------|--------------|---|
| Lipid Metabolism                                        | concentration | concentration of acetyl-coenzyme A      | 3.56E-02 | ACLY,BCL2L1  | 2 |
| Nervous System Development and Function                 | degeneration  | degeneration of myelin sheath           | 3.56E-02 | C6,CERS2     | 2 |
| Cellular Compromise                                     | degeneration  | degeneration of myelin sheath           | 3.56E-02 | C6,CERS2     | 2 |
| Cancer                                                  | cancer        | delay in cancer                         | 3.56E-02 | ERBB2,PBX3   | 2 |
| Cell Cycle                                              | S phase       | delay in initiation of S phase          | 3.56E-02 | FEN1,GADD45A | 2 |
| Cancer                                                  | tumorigenesis | delay in tumorigenesis of mammary gland | 3.56E-02 | AKT1,ERBB2   | 2 |
| Reproductive System Disease                             | tumorigenesis | delay in tumorigenesis of mammary gland | 3.56E-02 | AKT1,ERBB2   | 2 |
| Embryonic Development                                   | development   | development of anterior commissure      | 3.56E-02 | EPHA4,NTN1   | 2 |
| Organ Development                                       | development   | development of anterior commissure      | 3.56E-02 | EPHA4,NTN1   | 2 |
| Organismal Development                                  | development   | development of anterior commissure      | 3.56E-02 | EPHA4,NTN1   | 2 |
| Tissue Development                                      | development   | development of anterior commissure      | 3.56E-02 | EPHA4,NTN1   | 2 |
| Nervous System Development and Function                 | development   | development of anterior commissure      | 3.56E-02 | EPHA4,NTN1   | 2 |
| Embryonic Development                                   | development   | development of hair cells               | 3.56E-02 | MCOLN3,NR2F1 | 2 |
| Organ Development                                       | development   | development of hair cells               | 3.56E-02 | MCOLN3,NR2F1 | 2 |
| Organismal Development                                  | development   | development of hair cells               | 3.56E-02 | MCOLN3,NR2F1 | 2 |
| Tissue Development                                      | development   | development of hair cells               | 3.56E-02 | MCOLN3,NR2F1 | 2 |
| Nervous System Development and Function                 | development   | development of hair cells               | 3.56E-02 | MCOLN3,NR2F1 | 2 |
| Auditory and Vestibular System Development and Function | development   | development of hair cells               | 3.56E-02 | MCOLN3,NR2F1 | 2 |
| Cellular Development                                    | development   | development of hair cells               | 3.56E-02 | MCOLN3,NR2F1 | 2 |
| Embryonic Development                                   | development   | development of stomach                  | 3.56E-02 | CASP9,GATA4  | 2 |

|                                            |                                   |                                   |          |               |   |
|--------------------------------------------|-----------------------------------|-----------------------------------|----------|---------------|---|
| Organ Development                          | development                       | development of stomach            | 3.56E-02 | CASP9,GATA4   | 2 |
| Organismal Development                     | development                       | development of stomach            | 3.56E-02 | CASP9,GATA4   | 2 |
| Tissue Development                         | development                       | development of stomach            | 3.56E-02 | CASP9,GATA4   | 2 |
| Digestive System Development and Function  | development                       | development of stomach            | 3.56E-02 | CASP9,GATA4   | 2 |
| Cancer                                     | differentiation                   | differentiation of mammary tumor  | 3.56E-02 | AKT1,ERBB2    | 2 |
| Cellular Development                       | differentiation                   | differentiation of mammary tumor  | 3.56E-02 | AKT1,ERBB2    | 2 |
| Tumor Morphology                           | differentiation                   | differentiation of mammary tumor  | 3.56E-02 | AKT1,ERBB2    | 2 |
| Reproductive System Disease                | diminished ovarian reserve        | diminished ovarian reserve        | 3.56E-02 | CASP3,GATA4   | 2 |
| Endocrine System Disorders                 | diminished ovarian reserve        | diminished ovarian reserve        | 3.56E-02 | CASP3,GATA4   | 2 |
| Tissue Development                         | disruption                        | disruption of tight junctions     | 3.56E-02 | CASP3,MYLK    | 2 |
| Cell-To-Cell Signaling and Interaction     | disruption                        | disruption of tight junctions     | 3.56E-02 | CASP3,MYLK    | 2 |
| Cellular Assembly and Organization         | disruption                        | disruption of tight junctions     | 3.56E-02 | CASP3,MYLK    | 2 |
| Cellular Compromise                        | disruption                        | disruption of tight junctions     | 3.56E-02 | CASP3,MYLK    | 2 |
| Molecular Transport                        | efflux                            | efflux of K+                      | 3.56E-02 | BCL2L1,MAPK1  | 2 |
| Cellular Function and Maintenance          | efflux                            | efflux of K+                      | 3.56E-02 | BCL2L1,MAPK1  | 2 |
| Hereditary Disorder                        | experimental Huntington's disease | experimental Huntington's disease | 3.56E-02 | DDIT3,RPS6KA5 | 2 |
| Neurological Disease                       | experimental Huntington's disease | experimental Huntington's disease | 3.56E-02 | DDIT3,RPS6KA5 | 2 |
| Skeletal and Muscular Disorders            | experimental Huntington's disease | experimental Huntington's disease | 3.56E-02 | DDIT3,RPS6KA5 | 2 |
| Connective Tissue Development and Function | formation                         | formation of granulation tissue   | 3.56E-02 | ADORA2A,THBS1 | 2 |
| Tissue Development                         | formation                         | formation of granulation tissue   | 3.56E-02 | ADORA2A,THBS1 | 2 |
| Connective Tissue                          | formation                         | formation of trabecula            | 3.56E-02 | ERBB2,SFRP1   | 2 |

|                                                       |                 |                                           |          |              |   |
|-------------------------------------------------------|-----------------|-------------------------------------------|----------|--------------|---|
| Development and Function                              |                 |                                           |          |              |   |
| Embryonic Development                                 | formation       | formation of trabecula                    | 3.56E-02 | ERBB2,SFRP1  | 2 |
| Organ Development                                     | formation       | formation of trabecula                    | 3.56E-02 | ERBB2,SFRP1  | 2 |
| Organismal Development                                | formation       | formation of trabecula                    | 3.56E-02 | ERBB2,SFRP1  | 2 |
| Skeletal and Muscular System Development and Function | formation       | formation of trabecula                    | 3.56E-02 | ERBB2,SFRP1  | 2 |
| Tissue Development                                    | formation       | formation of trabecula                    | 3.56E-02 | ERBB2,SFRP1  | 2 |
| Tissue Development                                    | function        | function of extraembryonic tissue         | 3.56E-02 | FBXL5,KRT8   | 2 |
| Cancer                                                | hyperplasia     | hyperplasia of neurons                    | 3.56E-02 | CASP3,CASP9  | 2 |
| Neurological Disease                                  | hyperplasia     | hyperplasia of neurons                    | 3.56E-02 | CASP3,CASP9  | 2 |
| Developmental Disorder                                | hypoplasia      | hypoplasia of exocrine region of pancreas | 3.56E-02 | PBX1,THBS1   | 2 |
| Developmental Disorder                                | hypoplasia      | hypoplasia of tongue                      | 3.56E-02 | PBX1,PBX3    | 2 |
| Cancer                                                | immortalization | immortalization of keratinocytes          | 3.56E-02 | CCND1,CDK4   | 2 |
| Cellular Development                                  | immortalization | immortalization of keratinocytes          | 3.56E-02 | CCND1,CDK4   | 2 |
| Cell-To-Cell Signaling and Interaction                | immune response | immune response of natural killer cells   | 3.56E-02 | FCGR2A,FSTL1 | 2 |
| Hematological System Development and Function         | immune response | immune response of natural killer cells   | 3.56E-02 | FCGR2A,FSTL1 | 2 |
| Inflammatory Response                                 | immune response | immune response of natural killer cells   | 3.56E-02 | FCGR2A,FSTL1 | 2 |
| Hematological System Development and Function         | inactivation    | inactivation of myeloid cells             | 3.56E-02 | ADORA2A,POMC | 2 |
| Cellular Development                                  | inactivation    | inactivation of myeloid cells             | 3.56E-02 | ADORA2A,POMC | 2 |
| Cancer                                                | invasion        | invasion of extracellular matrix          | 3.56E-02 | ITGA5,NME1   | 2 |
| Cancer                                                | invasion        | invasion of mammary tumor                 | 3.56E-02 | AKT1,ERBB2   | 2 |
| Tumor                                                 | invasion        | invasion of                               | 3.56E-02 | AKT1,ERBB2   | 2 |

|                                              |                        |                             |          |              |   |
|----------------------------------------------|------------------------|-----------------------------|----------|--------------|---|
| Morphology                                   |                        | mammary tumor               |          |              |   |
| Organ Morphology                             | lack                   | lack of Harderian gland     | 3.56E-02 | RARB,RXRA    | 2 |
| Cell Death and Survival                      | lifespan               | lifespan of keratinocytes   | 3.56E-02 | CCND1,CDK4   | 2 |
| Cellular Development                         | lifespan               | lifespan of keratinocytes   | 3.56E-02 | CCND1,CDK4   | 2 |
| Hair and Skin Development and Function       | lifespan               | lifespan of keratinocytes   | 3.56E-02 | CCND1,CDK4   | 2 |
| Molecular Transport                          | localization           | localization of actin       | 3.56E-02 | FCGR2A,TIAM2 | 2 |
| Cellular Function and Maintenance            | localization           | localization of actin       | 3.56E-02 | FCGR2A,TIAM2 | 2 |
| Cellular Assembly and Organization           | localization           | localization of actin       | 3.56E-02 | FCGR2A,TIAM2 | 2 |
| Protein Synthesis                            | localization           | localization of actin       | 3.56E-02 | FCGR2A,TIAM2 | 2 |
| Protein Trafficking                          | localization           | localization of actin       | 3.56E-02 | FCGR2A,TIAM2 | 2 |
| Inflammatory Response                        | memory immune response | memory immune response      | 3.56E-02 | EP300,FCGR2A | 2 |
| Small Molecule Biochemistry                  | metabolism             | metabolism of homocysteine  | 3.56E-02 | MTHFR,MTR    | 2 |
| Amino Acid Metabolism                        | metabolism             | metabolism of homocysteine  | 3.56E-02 | MTHFR,MTR    | 2 |
| Cancer                                       | metastasis             | metastasis of mammary gland | 3.56E-02 | ERBB2,MMP11  | 2 |
| Reproductive System Disease                  | metastasis             | metastasis of mammary gland | 3.56E-02 | ERBB2,MMP11  | 2 |
| Organ Development                            | metastasis             | metastasis of mammary gland | 3.56E-02 | ERBB2,MMP11  | 2 |
| Tissue Development                           | metastasis             | metastasis of mammary gland | 3.56E-02 | ERBB2,MMP11  | 2 |
| Reproductive System Development and Function | metastasis             | metastasis of mammary gland | 3.56E-02 | ERBB2,MMP11  | 2 |
| Embryonic Development                        | morphogenesis          | morphogenesis of tail       | 3.56E-02 | SFRP5,TCF15  | 2 |
| Organismal Development                       | morphogenesis          | morphogenesis of tail       | 3.56E-02 | SFRP5,TCF15  | 2 |
| Cellular Function and Maintenance            | organization           | organization of chromatin   | 3.56E-02 | ARID1A,SAFB  | 2 |
| Cellular Assembly and Organization           | organization           | organization of chromatin   | 3.56E-02 | ARID1A,SAFB  | 2 |
| Cell Cycle                                   | organization           | organization of chromatin   | 3.56E-02 | ARID1A,SAFB  | 2 |
| DNA Replication,                             | organization           | organization of chromatin   | 3.56E-02 | ARID1A,SAFB  | 2 |

|                                           |                               |                                 |          |                 |   |
|-------------------------------------------|-------------------------------|---------------------------------|----------|-----------------|---|
| Recombination, and Repair                 |                               |                                 |          |                 |   |
| Organismal Injury and Abnormalities       | palmoplantar keratoderma      | palmoplantar keratoderma        | 3.56E-02 | DSP,JUP         | 2 |
| Dermatological Diseases and Conditions    | palmoplantar keratoderma      | palmoplantar keratoderma        | 3.56E-02 | DSP,JUP         | 2 |
| Immunological Disease                     | passive cutaneous anaphylaxis | passive cutaneous anaphylaxis   | 3.56E-02 | FCGR2A,GAB2     | 2 |
| Cell-To-Cell Signaling and Interaction    | permeability                  | permeability of tight junctions | 3.56E-02 | KRT8,MYLK3      | 2 |
| Cell Morphology                           | permeability                  | permeability of tight junctions | 3.56E-02 | KRT8,MYLK3      | 2 |
| Cellular Assembly and Organization        | permeability                  | permeability of tight junctions | 3.56E-02 | KRT8,MYLK3      | 2 |
| Cell Death and Survival                   | pyknosis                      | pyknosis of cells               | 3.56E-02 | BCL2L1,CASP3    | 2 |
| Tissue Development                        | quantity                      | quantity of desmosomes          | 3.56E-02 | DSP,JUP         | 2 |
| Cell-To-Cell Signaling and Interaction    | quantity                      | quantity of desmosomes          | 3.56E-02 | DSP,JUP         | 2 |
| Cellular Assembly and Organization        | quantity                      | quantity of desmosomes          | 3.56E-02 | DSP,JUP         | 2 |
| Small Molecule Biochemistry               | redistribution                | redistribution of cholesterol   | 3.56E-02 | ABCG1,ATP1A1    | 2 |
| Molecular Transport                       | redistribution                | redistribution of cholesterol   | 3.56E-02 | ABCG1,ATP1A1    | 2 |
| Lipid Metabolism                          | redistribution                | redistribution of cholesterol   | 3.56E-02 | ABCG1,ATP1A1    | 2 |
| Small Molecule Biochemistry               | regulation                    | regulation of L-glutamic acid   | 3.56E-02 | ADORA2A,SLC29A1 | 2 |
| Amino Acid Metabolism                     | regulation                    | regulation of L-glutamic acid   | 3.56E-02 | ADORA2A,SLC29A1 | 2 |
| Organismal Development                    | relaxation                    | relaxation of mice              | 3.56E-02 | ATP1A1,ATP1A2   | 2 |
| Cellular Function and Maintenance         | release                       | release of dense core granules  | 3.56E-02 | NSF,STX2        | 2 |
| Cellular Assembly and Organization        | release                       | release of dense core granules  | 3.56E-02 | NSF,STX2        | 2 |
| Small Molecule Biochemistry               | release                       | release of hydrocortisone       | 3.56E-02 | NPPB,POMC       | 2 |
| Molecular Transport                       | release                       | release of hydrocortisone       | 3.56E-02 | NPPB,POMC       | 2 |
| Endocrine System Development and Function | release                       | release of hydrocortisone       | 3.56E-02 | NPPB,POMC       | 2 |

|                                         |                                |                                            |          |                                                                                                                       |    |
|-----------------------------------------|--------------------------------|--------------------------------------------|----------|-----------------------------------------------------------------------------------------------------------------------|----|
| Drug Metabolism                         | release                        | release of hydrocortisone                  | 3.56E-02 | NPPB,POMC                                                                                                             | 2  |
| Lipid Metabolism                        | release                        | release of hydrocortisone                  | 3.56E-02 | NPPB,POMC                                                                                                             | 2  |
| Cell Morphology                         | size                           | size of T lymphocytes                      | 3.56E-02 | AKT1,BCL2L1                                                                                                           | 2  |
| Small Molecule Biochemistry             | synthesis                      | synthesis of sphingomyelin                 | 3.56E-02 | SGPL1,SLC27A1                                                                                                         | 2  |
| Lipid Metabolism                        | synthesis                      | synthesis of sphingomyelin                 | 3.56E-02 | SGPL1,SLC27A1                                                                                                         | 2  |
| Small Molecule Biochemistry             | transport                      | transport of lactic acid                   | 3.56E-02 | ATP1A2,PRNP                                                                                                           | 2  |
| Molecular Transport                     | transport                      | transport of lactic acid                   | 3.56E-02 | ATP1A2,PRNP                                                                                                           | 2  |
| Nucleic Acid Metabolism                 | transport                      | transport of nucleoside                    | 3.56E-02 | ADORA1,SLC29A1                                                                                                        | 2  |
| Small Molecule Biochemistry             | transport                      | transport of nucleoside                    | 3.56E-02 | ADORA1,SLC29A1                                                                                                        | 2  |
| Molecular Transport                     | transport                      | transport of nucleoside                    | 3.56E-02 | ADORA1,SLC29A1                                                                                                        | 2  |
| Cancer                                  | tumorigenesis                  | tumorigenesis of ovarian cancer cell lines | 3.56E-02 | IL27RA,PPAP2A                                                                                                         | 2  |
| Reproductive System Disease             | tumorigenesis                  | tumorigenesis of ovarian cancer cell lines | 3.56E-02 | IL27RA,PPAP2A                                                                                                         | 2  |
| Cancer                                  | type M3 acute myeloid leukemia | type M3 acute myeloid leukemia             | 3.56E-02 | RARB,RXRA                                                                                                             | 2  |
| Hematological Disease                   | type M3 acute myeloid leukemia | type M3 acute myeloid leukemia             | 3.56E-02 | RARB,RXRA                                                                                                             | 2  |
| Tissue Morphology                       | volume                         | volume of neurons                          | 3.56E-02 | BCL2L1,MAPK1                                                                                                          | 2  |
| Nervous System Development and Function | volume                         | volume of neurons                          | 3.56E-02 | BCL2L1,MAPK1                                                                                                          | 2  |
| Cell Morphology                         | volume                         | volume of neurons                          | 3.56E-02 | BCL2L1,MAPK1                                                                                                          | 2  |
| Cardiovascular Disease                  | infarction                     | Infarction                                 | 3.56E-02 | ADORA1,ADORA2A,AKT1,BCL2L1,C6,F AIM2,FSTL1,FSTL3,GATA4,GUCY1A3,MAPK1,MTHFR,NO X4,NPPB,NR3C2,PP1R1A,PRNP,TBX 5,TNFAIP3 | 19 |
| Nervous System Development and Function | analgesia                      | analgesia                                  | 3.57E-02 | ADCY1,ADORA1,HINT1,NPEPPS,POMC                                                                                        | 5  |
| Cell Death and Survival                 | apoptosis                      | apoptosis of dendritic cells               | 3.57E-02 | AKT1,BCL2L1,CASP3,CASP9,TNFAIP3                                                                                       | 5  |
| Cell Death and                          | cell death                     | cell death of                              | 3.57E-02 | AKT1,BAD,BCL2L1,                                                                                                      | 5  |

|                                                       |                     |                                  |          |                                |   |
|-------------------------------------------------------|---------------------|----------------------------------|----------|--------------------------------|---|
| Survival                                              |                     | liver cell lines                 |          | CASP3,CASP9                    |   |
| Tissue Morphology                                     | quantity            | quantity of islet cells          | 3.57E-02 | AKT1,BAD,CDK4,DACH1,FSTL3      | 5 |
| Endocrine System Development and Function             | quantity            | quantity of islet cells          | 3.57E-02 | AKT1,BAD,CDK4,DACH1,FSTL3      | 5 |
| Cellular Movement                                     | transmigration      | transmigration of granulocytes   | 3.57E-02 | ADORA1,ADORA2A,JAM3,MYLK3,RTN4 | 5 |
| Hematological System Development and Function         | transmigration      | transmigration of granulocytes   | 3.57E-02 | ADORA1,ADORA2A,JAM3,MYLK3,RTN4 | 5 |
| Immune Cell Trafficking                               | transmigration      | transmigration of granulocytes   | 3.57E-02 | ADORA1,ADORA2A,JAM3,MYLK3,RTN4 | 5 |
| Cancer                                                | Ewing's sarcoma     | Ewing's sarcoma                  | 3.57E-02 | FDFT1,HINT1,LGALS3BP           | 3 |
| Skeletal and Muscular Disorders                       | Ewing's sarcoma     | Ewing's sarcoma                  | 3.57E-02 | FDFT1,HINT1,LGALS3BP           | 3 |
| Connective Tissue Disorders                           | Ewing's sarcoma     | Ewing's sarcoma                  | 3.57E-02 | FDFT1,HINT1,LGALS3BP           | 3 |
| Cell Cycle                                            | S phase             | S phase of epithelial cell lines | 3.57E-02 | CCND1,ERBB2,NRIP1              | 3 |
| Hair and Skin Development and Function                | S phase             | S phase of epithelial cell lines | 3.57E-02 | CCND1,ERBB2,NRIP1              | 3 |
| Connective Tissue Development and Function            | abnormal morphology | abnormal morphology of atlas     | 3.57E-02 | CTGF,FSTL1,PKDC C              | 3 |
| Embryonic Development                                 | abnormal morphology | abnormal morphology of atlas     | 3.57E-02 | CTGF,FSTL1,PKDC C              | 3 |
| Organ Development                                     | abnormal morphology | abnormal morphology of atlas     | 3.57E-02 | CTGF,FSTL1,PKDC C              | 3 |
| Organ Morphology                                      | abnormal morphology | abnormal morphology of atlas     | 3.57E-02 | CTGF,FSTL1,PKDC C              | 3 |
| Organismal Development                                | abnormal morphology | abnormal morphology of atlas     | 3.57E-02 | CTGF,FSTL1,PKDC C              | 3 |
| Skeletal and Muscular System Development and Function | abnormal morphology | abnormal morphology of atlas     | 3.57E-02 | CTGF,FSTL1,PKDC C              | 3 |
| Tissue Development                                    | abnormal morphology | abnormal morphology of atlas     | 3.57E-02 | CTGF,FSTL1,PKDC C              | 3 |

|                                                         |                       |                                              |          |                        |   |
|---------------------------------------------------------|-----------------------|----------------------------------------------|----------|------------------------|---|
| Nervous System Development and Function                 | abnormal morphology   | abnormal morphology of atlas                 | 3.57E-02 | CTGF,FSTL1,PKDC C      | 3 |
| Cardiovascular Disease                                  | bleeding              | bleeding of blood vessel                     | 3.57E-02 | CASP9,EPAS1,POMC       | 3 |
| Organismal Injury and Abnormalities                     | bleeding              | bleeding of blood vessel                     | 3.57E-02 | CASP9,EPAS1,POMC       | 3 |
| Cell Morphology                                         | cell spreading        | cell spreading of gonadal cell lines         | 3.57E-02 | AKT1,ARHGAP24,NSF      | 3 |
| Reproductive System Development and Function            | cell spreading        | cell spreading of gonadal cell lines         | 3.57E-02 | AKT1,ARHGAP24,NSF      | 3 |
| Cardiovascular Disease                                  | chronic heart failure | chronic heart failure                        | 3.57E-02 | CA2,GATA4,NPPB         | 3 |
| Cellular Growth and Proliferation                       | cytostasis            | cytostasis of lung cancer cell lines         | 3.57E-02 | NR2F1,RARB,RXR A       | 3 |
| Tissue Development                                      | development           | development of sensory neurons               | 3.57E-02 | MCOLN3,NR2F1,THBS1     | 3 |
| Nervous System Development and Function                 | development           | development of sensory neurons               | 3.57E-02 | MCOLN3,NR2F1,THBS1     | 3 |
| Cellular Development                                    | development           | development of sensory neurons               | 3.57E-02 | MCOLN3,NR2F1,THBS1     | 3 |
| Cell Cycle                                              | interphase            | interphase of hematopoietic progenitor cells | 3.57E-02 | AKT1,BCL2L1,E2F5       | 3 |
| Cell Morphology                                         | orientation           | orientation of stereocilia bundles           | 3.57E-02 | NR2F1,SFRP1,VANG L2    | 3 |
| Cellular Assembly and Organization                      | orientation           | orientation of stereocilia bundles           | 3.57E-02 | NR2F1,SFRP1,VANG L2    | 3 |
| Auditory and Vestibular System Development and Function | orientation           | orientation of stereocilia bundles           | 3.57E-02 | NR2F1,SFRP1,VANG L2    | 3 |
| Small Molecule Biochemistry                             | release               | release of hormone                           | 3.57E-02 | NPPB,POMC,RBMS 1       | 3 |
| Nervous System Development and Function                 | sleep                 | sleep                                        | 3.57E-02 | ADORA1,ADORA2A,SLC29A1 | 3 |
| Nervous System Development and Function                 | synaptic transmission | synaptic transmission of pyramidal neurons   | 3.57E-02 | ADORA2A,NSF,PRNP       | 3 |
| Cell-To-Cell Signaling and                              | synaptic transmission | synaptic transmission of                     | 3.57E-02 | ADORA2A,NSF,PRNP       | 3 |

|                                               |                       |                                 |          |                                                                                                                                                                                 |    |
|-----------------------------------------------|-----------------------|---------------------------------|----------|---------------------------------------------------------------------------------------------------------------------------------------------------------------------------------|----|
| Interaction                                   |                       | pyramidal neurons               |          |                                                                                                                                                                                 |    |
| Cancer                                        | endocrine gland tumor | endocrine gland tumor           | 3.68E-02 | AKT1,ALDH2,ATP1A1,ATP1A2,BAD,CASP3,CCND1,CDK4,DLL1,ECM1,EP300,ERBB2,GADD45A,GOLGA5,HAND1,H OXB2,HOXB6,ITGA5,LSM7,MMP11,NRIP1,PCM1,POLE4,POMC,RAP1GAP,RARB,SEMA4D,SERPINF1,THBS1 | 29 |
| Cell Death and Survival                       | quantity              | quantity of apoptotic cells     | 3.82E-02 | BCL2L1,CASP3,CASP9,DDIT3,EPHA4,HEXB,THBS1,VASH1                                                                                                                                 | 8  |
| Cancer                                        | Kaposi's sarcoma      | Kaposi's sarcoma                | 3.84E-02 | IFNAR2,RARB,RXRA,TUBA1A                                                                                                                                                         | 4  |
| Dermatological Diseases and Conditions        | Kaposi's sarcoma      | Kaposi's sarcoma                | 3.84E-02 | IFNAR2,RARB,RXRA,TUBA1A                                                                                                                                                         | 4  |
| Cellular Assembly and Organization            | amplification         | amplification of centrosome     | 3.84E-02 | CCND1,CDK4,GADD45A,MTA1                                                                                                                                                         | 4  |
| DNA Replication, Recombination, and Repair    | amplification         | amplification of centrosome     | 3.84E-02 | CCND1,CDK4,GADD45A,MTA1                                                                                                                                                         | 4  |
| Cell Death and Survival                       | cell viability        | cell viability of thymocytes    | 3.84E-02 | AKT1,BCL2L1,CASP9,CBFB                                                                                                                                                          | 4  |
| Hematological System Development and Function | cell viability        | cell viability of thymocytes    | 3.84E-02 | AKT1,BCL2L1,CASP9,CBFB                                                                                                                                                          | 4  |
| Connective Tissue Development and Function    | cytostasis            | cytostasis of fibroblasts       | 3.84E-02 | ADORA1,ADORA2A,PCYOX1,SAFB                                                                                                                                                      | 4  |
| Cellular Growth and Proliferation             | cytostasis            | cytostasis of fibroblasts       | 3.84E-02 | ADORA1,ADORA2A,PCYOX1,SAFB                                                                                                                                                      | 4  |
| Cellular Function and Maintenance             | function              | function of endothelial cells   | 3.84E-02 | CD151,H2AFX,ITGA5,NR3C2                                                                                                                                                         | 4  |
| Small Molecule Biochemistry                   | metabolism            | metabolism of sulfur amino acid | 3.84E-02 | MTHFR,MTR,PCYOX1,SHMT2                                                                                                                                                          | 4  |
| Amino Acid Metabolism                         | metabolism            | metabolism of sulfur amino acid | 3.84E-02 | MTHFR,MTR,PCYOX1,SHMT2                                                                                                                                                          | 4  |
| Tissue Morphology                             | morphology            | morphology of mesoderm          | 3.84E-02 | ITGA5,PBX1,TCF15,TEAD2                                                                                                                                                          | 4  |
| Embryonic                                     | morphology            | morphology of                   | 3.84E-02 | ITGA5,PBX1,TCF15                                                                                                                                                                | 4  |

|                                               |                               |                               |          |                                                                                                                                                                                                                                                                        |    |
|-----------------------------------------------|-------------------------------|-------------------------------|----------|------------------------------------------------------------------------------------------------------------------------------------------------------------------------------------------------------------------------------------------------------------------------|----|
| Development                                   |                               | mesoderm                      |          | ,TEAD2                                                                                                                                                                                                                                                                 |    |
| Organismal Injury and Abnormalities           | neurocutaneous syndrome       | neurocutaneous syndrome       | 3.84E-02 | ADM,CCND1,DDIT3,TSC1                                                                                                                                                                                                                                                   | 4  |
| Developmental Disorder                        | neurocutaneous syndrome       | neurocutaneous syndrome       | 3.84E-02 | ADM,CCND1,DDIT3,TSC1                                                                                                                                                                                                                                                   | 4  |
| Dermatological Diseases and Conditions        | neurocutaneous syndrome       | neurocutaneous syndrome       | 3.84E-02 | ADM,CCND1,DDIT3,TSC1                                                                                                                                                                                                                                                   | 4  |
| Neurological Disease                          | neurocutaneous syndrome       | neurocutaneous syndrome       | 3.84E-02 | ADM,CCND1,DDIT3,TSC1                                                                                                                                                                                                                                                   | 4  |
| Cardiovascular Disease                        | persistent truncus arteriosus | persistent truncus arteriosus | 3.84E-02 | GATA4,PBX1,RARB,RXRA                                                                                                                                                                                                                                                   | 4  |
| Developmental Disorder                        | persistent truncus arteriosus | persistent truncus arteriosus | 3.84E-02 | GATA4,PBX1,RARB,RXRA                                                                                                                                                                                                                                                   | 4  |
| Respiratory Disease                           | persistent truncus arteriosus | persistent truncus arteriosus | 3.84E-02 | GATA4,PBX1,RARB,RXRA                                                                                                                                                                                                                                                   | 4  |
| Small Molecule Biochemistry                   | phosphorylation               | phosphorylation of lipid      | 3.84E-02 | NME1,PIP5K1C,SMG1,SYNJ2                                                                                                                                                                                                                                                | 4  |
| Lipid Metabolism                              | phosphorylation               | phosphorylation of lipid      | 3.84E-02 | NME1,PIP5K1C,SMG1,SYNJ2                                                                                                                                                                                                                                                | 4  |
| Small Molecule Biochemistry                   | redistribution                | redistribution of lipid       | 3.84E-02 | ABCG1,ATP1A1,SLC27A1,TRPC1                                                                                                                                                                                                                                             | 4  |
| Lipid Metabolism                              | redistribution                | redistribution of lipid       | 3.84E-02 | ABCG1,ATP1A1,SLC27A1,TRPC1                                                                                                                                                                                                                                             | 4  |
| Cellular Movement                             | transmigration                | transmigration of neutrophils | 3.84E-02 | ADORA2A,JAM3,MYLK3,RTN4                                                                                                                                                                                                                                                | 4  |
| Hematological System Development and Function | transmigration                | transmigration of neutrophils | 3.84E-02 | ADORA2A,JAM3,MYLK3,RTN4                                                                                                                                                                                                                                                | 4  |
| Immune Cell Trafficking                       | transmigration                | transmigration of neutrophils | 3.84E-02 | ADORA2A,JAM3,MYLK3,RTN4                                                                                                                                                                                                                                                | 4  |
| Inflammatory Response                         | transmigration                | transmigration of neutrophils | 3.84E-02 | ADORA2A,JAM3,MYLK3,RTN4                                                                                                                                                                                                                                                | 4  |
| Neurological Disease                          | neuromuscular disease         | neuromuscular disease         | 3.88E-02 | ADORA1,ADORA2A,AGXT2L1,AHCYL1,AKT1,ALDH2,ATP2A2,B3GNT1,B4GALT5,BCL2L1,CA2,CASP3,CASP9,CIRBP,COLQ,CTGF,CTIF,CYFIP2,DDIT3,DKK3,DUSP5,EML1,EPHA4,FDFT1,GADD45A,GFPT1,GRIN2C,GYPC,HINT1,IFIT1,IFNAR2,INPP1,MBTPS1,MEF2D,MPDZ,MT1X,NAP1L5,NME1,PGAM2,PPP1CB,PPP1R1A,PPRC1,P | 61 |

|                                        |                       |                        |          |                                                                                                                                                                                                                                                                                                                                                                                      |    |
|----------------------------------------|-----------------------|------------------------|----------|--------------------------------------------------------------------------------------------------------------------------------------------------------------------------------------------------------------------------------------------------------------------------------------------------------------------------------------------------------------------------------------|----|
|                                        |                       |                        |          | RDX6,PRNP,RANBP1,RAP1GAP,RARB,RDBP,REV1,RPS6KA5,RTN4,SCN1B,SLC27A1,SRM,TESC,TUBA1A,TUBA1B,TUBB2B,UBB,UCK2,VCAN                                                                                                                                                                                                                                                                       |    |
| Skeletal and Muscular Disorders        | neuromuscular disease | neuromuscular disease  | 3.88E-02 | ADORA1,ADORA2A,AGXT2L1,AHCYL1,AKT1,ALDH2,ATP2A2,B3GNT1,B4GALT5,BCL2L1,CA2,CASP3,CASP9,CIRBP,COLQ,CTGF,CTIF,CYFIP2,DDIT3,DKK3,DUSP5,EML1,EPHA4,FDFT1,GADD45A,GFPT1,GRIN2C,GYPC,HINT1,IFIT1,IFNAR2,INPP1,MBTPS1,MEF2D,MPDZ,MT1X,NAP1L5,NME1,PGAM2,PPP1CB,PPP1R1A,PPRC1,PRDX6,PRNP,RANBP1,RAP1GAP,RARB,RDBP,REV1,RPS6KA5,RTN4,SCN1B,SLC27A1,SRM,TESC,TUBA1A,TUBA1B,TUBB2B,UBB,UCK2,VCAN | 61 |
| Cancer                                 | thyroid carcinoma     | thyroid carcinoma      | 3.95E-02 | AKT1,BAD,CDK4,ERBB2,GOLGA5,ITGA5,LSM7,PCM1,RAP1GAP,THBS1                                                                                                                                                                                                                                                                                                                             | 10 |
| Endocrine System Disorders             | thyroid carcinoma     | thyroid carcinoma      | 3.95E-02 | AKT1,BAD,CDK4,ERBB2,GOLGA5,ITGA5,LSM7,PCM1,RAP1GAP,THBS1                                                                                                                                                                                                                                                                                                                             | 10 |
| Tissue Development                     | cell-cell adhesion    | cell-cell adhesion     | 3.98E-02 | CD151,CNTN3,CYFIP2,DSP,ITGA5,JUP,LIMS1,MPZL2,NINJ2,NME1,NTN1,PIP5K1C,RAP1GAP,ZYX                                                                                                                                                                                                                                                                                                     | 14 |
| Cell-To-Cell Signaling and Interaction | cell-cell adhesion    | cell-cell adhesion     | 3.98E-02 | CD151,CNTN3,CYFIP2,DSP,ITGA5,JUP,LIMS1,MPZL2,NINJ2,NME1,NTN1,PIP5K1C,RAP1GAP,ZYX                                                                                                                                                                                                                                                                                                     | 14 |
| Tissue Morphology                      | closure               | closure of neural tube | 4.15E-02 | ADM,BBS4,CASP9,EP300,FDFT1,LIAS,SERPINH1,SFRP1,TEAD2,TSC1,VANG L2                                                                                                                                                                                                                                                                                                                    | 11 |

|                              |                                                  |                                                  |          |                                                                                                                                                                              |    |
|------------------------------|--------------------------------------------------|--------------------------------------------------|----------|------------------------------------------------------------------------------------------------------------------------------------------------------------------------------|----|
| Embryonic Development        | closure                                          | closure of neural tube                           | 4.15E-02 | ADM,BBS4,CASP9,EP300,FDFT1,LIAS,SERPINH1,SFRP1,TEAD2,TSC1,VANG L2                                                                                                            | 11 |
| Organismal Development       | closure                                          | closure of neural tube                           | 4.15E-02 | ADM,BBS4,CASP9,EP300,FDFT1,LIAS,SERPINH1,SFRP1,TEAD2,TSC1,VANG L2                                                                                                            | 11 |
| Tissue Development           | closure                                          | closure of neural tube                           | 4.15E-02 | ADM,BBS4,CASP9,EP300,FDFT1,LIAS,SERPINH1,SFRP1,TEAD2,TSC1,VANG L2                                                                                                            | 11 |
| Developmental Disorder       | congenital anomalies of kidney and urinary tract | congenital anomalies of kidney and urinary tract | 4.15E-02 | ACTN1,ARHGAP1,BAD,BCL2L1,CALD1,CCND1,EPAS1,FSTL1,PBX1,PDE7B,RARB                                                                                                             | 11 |
| Renal and Urological Disease | congenital anomalies of kidney and urinary tract | congenital anomalies of kidney and urinary tract | 4.15E-02 | ACTN1,ARHGAP1,BAD,BCL2L1,CALD1,CCND1,EPAS1,FSTL1,PBX1,PDE7B,RARB                                                                                                             | 11 |
| Cancer                       | neoplasia                                        | Ovarian Cancer and Tumors                        | 4.19E-02 | AKT1,ARID1A,BCL2L1,CALCOCO2,CDK4,COL4A1,CTDSP L,CTNNAL1,CYP1B1,DACH1,EP300,ERBB2,GAB2,GADD45A,H2AFX,H2AFY,HOXB2,HOXB6,POL E4,POMC,PPAP2A,PTPN1,RRAS,SLC16A3,TUBA1A,URI1,VCAN | 27 |
| Reproductive System Disease  | neoplasia                                        | Ovarian Cancer and Tumors                        | 4.19E-02 | AKT1,ARID1A,BCL2L1,CALCOCO2,CDK4,COL4A1,CTDSP L,CTNNAL1,CYP1B1,DACH1,EP300,ERBB2,GAB2,GADD45A,H2AFX,H2AFY,HOXB2,HOXB6,POL E4,POMC,PPAP2A,PTPN1,RRAS,SLC16A3,TUBA1A,URI1,VCAN | 27 |
| Endocrine System Disorders   | neoplasia                                        | Ovarian Cancer and Tumors                        | 4.19E-02 | AKT1,ARID1A,BCL2L1,CALCOCO2,CDK4,COL4A1,CTDSP L,CTNNAL1,CYP1B1,DACH1,EP300,ERBB2,GAB2,GADD45                                                                                 | 27 |

|                                                     |                        |                                   |          |                                                                                                                                                                              |    |
|-----------------------------------------------------|------------------------|-----------------------------------|----------|------------------------------------------------------------------------------------------------------------------------------------------------------------------------------|----|
|                                                     |                        |                                   |          | A,H2AFX,H2AFY,H<br>OXB2,HOXB6,POL<br>E4,POMC,PPAP2A,<br>PTPN1,RRAS,SLC1<br>6A3,TUBA1A,URI1,<br>VCAN                                                                          |    |
| Embryonic<br>Development                            | closure                | closure of<br>embryonic<br>tissue | 4.28E-02 | ADM,BBS4,BCL2L1,<br>CASP9,EP300,FDF<br>T1,LIAS,SERPINH1,<br>SFRP1,TEAD2,TSC<br>1,VANGL2                                                                                      | 12 |
| Organismal<br>Development                           | closure                | closure of<br>embryonic<br>tissue | 4.28E-02 | ADM,BBS4,BCL2L1,<br>CASP9,EP300,FDF<br>T1,LIAS,SERPINH1,<br>SFRP1,TEAD2,TSC<br>1,VANGL2                                                                                      | 12 |
| Tissue<br>Development                               | closure                | closure of<br>embryonic<br>tissue | 4.28E-02 | ADM,BBS4,BCL2L1,<br>CASP9,EP300,FDF<br>T1,LIAS,SERPINH1,<br>SFRP1,TEAD2,TSC<br>1,VANGL2                                                                                      | 12 |
| Connective<br>Tissue<br>Development<br>and Function | abnormal<br>morphology | abnormal<br>morphology of<br>bone | 4.43E-02 | ARHGAP1,CCND1,<br>CTGF,DPCD,E2F5,<br>EGLN2,FSTL1,HEX<br>B,HOXB2,HOXB6,IT<br>GB1BP1,PBX1,PKD<br>CC,PTPRE,RARB,R<br>OR2,SMARCAL1,T<br>AB1,TASP1,TBX5,T<br>CF15,TEAD2,TSHZ<br>1 | 23 |
| Embryonic<br>Development                            | abnormal<br>morphology | abnormal<br>morphology of<br>bone | 4.43E-02 | ARHGAP1,CCND1,<br>CTGF,DPCD,E2F5,<br>EGLN2,FSTL1,HEX<br>B,HOXB2,HOXB6,IT<br>GB1BP1,PBX1,PKD<br>CC,PTPRE,RARB,R<br>OR2,SMARCAL1,T<br>AB1,TASP1,TBX5,T<br>CF15,TEAD2,TSHZ<br>1 | 23 |
| Organ<br>Development                                | abnormal<br>morphology | abnormal<br>morphology of<br>bone | 4.43E-02 | ARHGAP1,CCND1,<br>CTGF,DPCD,E2F5,<br>EGLN2,FSTL1,HEX<br>B,HOXB2,HOXB6,IT<br>GB1BP1,PBX1,PKD<br>CC,PTPRE,RARB,R<br>OR2,SMARCAL1,T<br>AB1,TASP1,TBX5,T<br>CF15,TEAD2,TSHZ<br>1 | 23 |
| Organ<br>Morphology                                 | abnormal<br>morphology | abnormal<br>morphology of<br>bone | 4.43E-02 | ARHGAP1,CCND1,<br>CTGF,DPCD,E2F5,<br>EGLN2,FSTL1,HEX<br>B,HOXB2,HOXB6,IT                                                                                                     | 23 |

|                                                                   |                        |                                                      |          |                                                                                                                                                                              |    |
|-------------------------------------------------------------------|------------------------|------------------------------------------------------|----------|------------------------------------------------------------------------------------------------------------------------------------------------------------------------------|----|
|                                                                   |                        |                                                      |          | GB1BP1,PBX1,PKD<br>CC,PTPRE,RARB,R<br>OR2,SMARCAL1,T<br>AB1,TASP1,TBX5,T<br>CF15,TEAD2,TSHZ<br>1                                                                             |    |
| Organismal<br>Development                                         | abnormal<br>morphology | abnormal<br>morphology of<br>bone                    | 4.43E-02 | ARHGAP1,CCND1,<br>CTGF,DPCD,E2F5,<br>EGLN2,FSTL1,HEX<br>B,HOXB2,HOXB6,IT<br>GB1BP1,PBX1,PKD<br>CC,PTPRE,RARB,R<br>OR2,SMARCAL1,T<br>AB1,TASP1,TBX5,T<br>CF15,TEAD2,TSHZ<br>1 | 23 |
| Skeletal and<br>Muscular<br>System<br>Development<br>and Function | abnormal<br>morphology | abnormal<br>morphology of<br>bone                    | 4.43E-02 | ARHGAP1,CCND1,<br>CTGF,DPCD,E2F5,<br>EGLN2,FSTL1,HEX<br>B,HOXB2,HOXB6,IT<br>GB1BP1,PBX1,PKD<br>CC,PTPRE,RARB,R<br>OR2,SMARCAL1,T<br>AB1,TASP1,TBX5,T<br>CF15,TEAD2,TSHZ<br>1 | 23 |
| Tissue<br>Development                                             | abnormal<br>morphology | abnormal<br>morphology of<br>bone                    | 4.43E-02 | ARHGAP1,CCND1,<br>CTGF,DPCD,E2F5,<br>EGLN2,FSTL1,HEX<br>B,HOXB2,HOXB6,IT<br>GB1BP1,PBX1,PKD<br>CC,PTPRE,RARB,R<br>OR2,SMARCAL1,T<br>AB1,TASP1,TBX5,T<br>CF15,TEAD2,TSHZ<br>1 | 23 |
| Organ<br>Morphology                                               | abnormal<br>morphology | abnormal<br>morphology of<br>islets of<br>Langerhans | 4.49E-02 | AKT1,CDK4,DACH1<br>,FSTL3,PBX1                                                                                                                                               | 5  |
| Digestive<br>System<br>Development<br>and Function                | abnormal<br>morphology | abnormal<br>morphology of<br>islets of<br>Langerhans | 4.49E-02 | AKT1,CDK4,DACH1<br>,FSTL3,PBX1                                                                                                                                               | 5  |
| Endocrine<br>System<br>Development<br>and Function                | abnormal<br>morphology | abnormal<br>morphology of<br>islets of<br>Langerhans | 4.49E-02 | AKT1,CDK4,DACH1<br>,FSTL3,PBX1                                                                                                                                               | 5  |
| Organ<br>Morphology                                               | abnormal<br>morphology | abnormal<br>morphology of<br>ventricular<br>septum   | 4.62E-02 | ADM,ATP2A2,CCN<br>D1,GATA4,RXRA,T<br>AB1,THBS1                                                                                                                               | 7  |
| Cardiovascular<br>System<br>Development                           | abnormal<br>morphology | abnormal<br>morphology of<br>ventricular             | 4.62E-02 | ADM,ATP2A2,CCN<br>D1,GATA4,RXRA,T<br>AB1,THBS1                                                                                                                               | 7  |

|                                                       |                          |                                       |          |                                                                     |    |
|-------------------------------------------------------|--------------------------|---------------------------------------|----------|---------------------------------------------------------------------|----|
| and Function                                          |                          | septum                                |          |                                                                     |    |
| Digestive System Development and Function             | development              | development of gastrointestinal tract | 4.62E-02 | CASP9,EP300,GATA4,SFRP1,SFRP5,STX2,VANGL2                           | 7  |
| Embryonic Development                                 | formation                | formation of myofibrils               | 4.62E-02 | EP300,GATA4,KRT8,MYLK,MYLK3,MYOZ1,TBX5                              | 7  |
| Organ Development                                     | formation                | formation of myofibrils               | 4.62E-02 | EP300,GATA4,KRT8,MYLK,MYLK3,MYOZ1,TBX5                              | 7  |
| Organismal Development                                | formation                | formation of myofibrils               | 4.62E-02 | EP300,GATA4,KRT8,MYLK,MYLK3,MYOZ1,TBX5                              | 7  |
| Skeletal and Muscular System Development and Function | formation                | formation of myofibrils               | 4.62E-02 | EP300,GATA4,KRT8,MYLK,MYLK3,MYOZ1,TBX5                              | 7  |
| Tissue Development                                    | formation                | formation of myofibrils               | 4.62E-02 | EP300,GATA4,KRT8,MYLK,MYLK3,MYOZ1,TBX5                              | 7  |
| Cellular Assembly and Organization                    | formation                | formation of myofibrils               | 4.62E-02 | EP300,GATA4,KRT8,MYLK,MYLK3,MYOZ1,TBX5                              | 7  |
| Cancer                                                | papillary thyroid cancer | papillary thyroid cancer              | 4.62E-02 | BAD,GOLGA5,ITGA5,LSM7,PCM1,RAP1GAP,THBS1                            | 7  |
| Endocrine System Disorders                            | papillary thyroid cancer | papillary thyroid cancer              | 4.62E-02 | BAD,GOLGA5,ITGA5,LSM7,PCM1,RAP1GAP,THBS1                            | 7  |
| Tissue Morphology                                     | size                     | size of infarct                       | 4.66E-02 | ADORA2A,AKT1,FAIM2,FSTL3,GATA4,NOX4,NR3C2,PPP1R1A,PRNP,TBX5,TNFAIP3 | 11 |
| Cardiovascular Disease                                | size                     | size of infarct                       | 4.66E-02 | ADORA2A,AKT1,FAIM2,FSTL3,GATA4,NOX4,NR3C2,PPP1R1A,PRNP,TBX5,TNFAIP3 | 11 |
| Organismal Injury and Abnormalities                   | size                     | size of infarct                       | 4.66E-02 | ADORA2A,AKT1,FAIM2,FSTL3,GATA4,NOX4,NR3C2,PPP1R1A,PRNP,TBX5,TNFAIP3 | 11 |
| Nervous System Development and Function               | function                 | function of neurons                   | 4.68E-02 | ADORA1,ADORA2A,CPLX3,EPAS1,POMC,TNFRSF19                            | 6  |
| Cellular Function and Maintenance                     | function                 | function of neurons                   | 4.68E-02 | ADORA1,ADORA2A,CPLX3,EPAS1,POMC,TNFRSF19                            | 6  |
| Cellular Movement                                     | invasion                 | invasion of fibroblast cell           | 4.68E-02 | ERBB2,FSTL1,JUP,NTN1,RND3,SEMA                                      | 6  |

|                                            |                     | lines                                 |          | 4D                                                                                                                                                                    |    |
|--------------------------------------------|---------------------|---------------------------------------|----------|-----------------------------------------------------------------------------------------------------------------------------------------------------------------------|----|
| Cancer                                     | neoplasia           | neoplasia of breast cancer cell lines | 4.68E-02 | AKT1,CD151,EPAS1,ERBB2,NME1,SEMA4D                                                                                                                                    | 6  |
| Reproductive System Disease                | neoplasia           | neoplasia of breast cancer cell lines | 4.68E-02 | AKT1,CD151,EPAS1,ERBB2,NME1,SEMA4D                                                                                                                                    | 6  |
| Cancer                                     | sarcoma             | sarcoma                               | 4.80E-02 | ADM,CDK4,CYP1B1,DDIT3,ERBB2,FDFT1,H2AFX,HINT1,HSPA4,IFNAR2,LGALS3BP,PFKL,PRDX1,RARB,RXRA,SFRP1,TFG,THBS1,TSC1,TUBA1A                                                  | 20 |
| Cancer                                     | urinary tract tumor | urinary tract tumor                   | 4.82E-02 | AKT1,ARID1A,CDK4,ERBB2,MAPK1,POLE4,SFRP1,TSC1,TUBB2B                                                                                                                  | 9  |
| Renal and Urological Disease               | urinary tract tumor | urinary tract tumor                   | 4.82E-02 | AKT1,ARID1A,CDK4,ERBB2,MAPK1,POLE4,SFRP1,TSC1,TUBB2B                                                                                                                  | 9  |
| Small Molecule Biochemistry                | synthesis           | synthesis of steroid                  | 4.83E-02 | ABCG1,ACBD3,ACOX2,ADM,ATP1A1,CYP1B1,DIAPH1,DKK3,FDFT1,KCNJ5,MAPK1,MBTPS1,NR2F1,POMC                                                                                   | 14 |
| Lipid Metabolism                           | synthesis           | synthesis of steroid                  | 4.83E-02 | ABCG1,ACBD3,ACOX2,ADM,ATP1A1,CYP1B1,DIAPH1,DKK3,FDFT1,KCNJ5,MAPK1,MBTPS1,NR2F1,POMC                                                                                   | 14 |
| Vitamin and Mineral Metabolism             | synthesis           | synthesis of steroid                  | 4.83E-02 | ABCG1,ACBD3,ACOX2,ADM,ATP1A1,CYP1B1,DIAPH1,DKK3,FDFT1,KCNJ5,MAPK1,MBTPS1,NR2F1,POMC                                                                                   | 14 |
| Connective Tissue Development and Function | morphology          | morphology of bone                    | 4.87E-02 | ARHGAP1,CCND1,CTGF,DARC,DPCD,E2F5,EGLN2,FSTL1,GAB2,HEXB,HOXB2,HOXB6,ITGB1BP1,PBX1,PKDCC,PLCG2,PTPRE,RARB,ROR2,SMARCAL1,TAB1,TASP1,TBX5,TCF15,TEAD2,THBS1,TM7SF2,TSHZ1 | 28 |
| Embryonic Development                      | morphology          | morphology of bone                    | 4.87E-02 | ARHGAP1,CCND1,CTGF,DARC,DPCD,E2F5,EGLN2,FSTL1                                                                                                                         | 28 |

|                                                       |            |                    |          |                                                                                                                                                                       |    |
|-------------------------------------------------------|------------|--------------------|----------|-----------------------------------------------------------------------------------------------------------------------------------------------------------------------|----|
|                                                       |            |                    |          | ,GAB2,HEXB,HOXB2,HOXB6,ITGB1BP1,PBX1,PKDCC,PLCG2,PTPRE,RARB,ROR2,SMARCAL1,TAB1,TASP1,TBX5,TCF15,TEAD2,THBS1,TM7SF2,TSHZ1                                              |    |
| Organ Development                                     | morphology | morphology of bone | 4.87E-02 | ARHGAP1,CCND1,CTGF,DARC,DPCD,E2F5,EGLN2,FSTL1,GAB2,HEXB,HOXB2,HOXB6,ITGB1BP1,PBX1,PKDCC,PLCG2,PTPRE,RARB,ROR2,SMARCAL1,TAB1,TASP1,TBX5,TCF15,TEAD2,THBS1,TM7SF2,TSHZ1 | 28 |
| Organ Morphology                                      | morphology | morphology of bone | 4.87E-02 | ARHGAP1,CCND1,CTGF,DARC,DPCD,E2F5,EGLN2,FSTL1,GAB2,HEXB,HOXB2,HOXB6,ITGB1BP1,PBX1,PKDCC,PLCG2,PTPRE,RARB,ROR2,SMARCAL1,TAB1,TASP1,TBX5,TCF15,TEAD2,THBS1,TM7SF2,TSHZ1 | 28 |
| Organismal Development                                | morphology | morphology of bone | 4.87E-02 | ARHGAP1,CCND1,CTGF,DARC,DPCD,E2F5,EGLN2,FSTL1,GAB2,HEXB,HOXB2,HOXB6,ITGB1BP1,PBX1,PKDCC,PLCG2,PTPRE,RARB,ROR2,SMARCAL1,TAB1,TASP1,TBX5,TCF15,TEAD2,THBS1,TM7SF2,TSHZ1 | 28 |
| Skeletal and Muscular System Development and Function | morphology | morphology of bone | 4.87E-02 | ARHGAP1,CCND1,CTGF,DARC,DPCD,E2F5,EGLN2,FSTL1,GAB2,HEXB,HOXB2,HOXB6,ITGB1BP1,PBX1,PKDCC,PLCG2,PTPRE,RARB,ROR2,SMARCAL1,TAB1,TASP1,TBX5,TCF15,TEAD2,THBS1,TM7SF2,TSHZ1 | 28 |
| Tissue Development                                    | morphology | morphology of bone | 4.87E-02 | ARHGAP1,CCND1,CTGF,DARC,DPCD,E2F5,EGLN2,FSTL1,GAB2,HEXB,HOXB                                                                                                          | 28 |

|        |                      |                      |          |                                                                                                                                                                                                                                                                                                                                                                                                                                                                                                                                                                                                                                                                                                                                                               |     |
|--------|----------------------|----------------------|----------|---------------------------------------------------------------------------------------------------------------------------------------------------------------------------------------------------------------------------------------------------------------------------------------------------------------------------------------------------------------------------------------------------------------------------------------------------------------------------------------------------------------------------------------------------------------------------------------------------------------------------------------------------------------------------------------------------------------------------------------------------------------|-----|
|        |                      |                      |          | 2,HOXB6,ITGB1BP1,PBX1,PKDCC,PLCG2,PTPRE,RARB,ROR2,SMARCAL1,TAB1,TASP1,TBX5,TCF15,TEAD2,THBS1,TM7SF2,TSHZ1                                                                                                                                                                                                                                                                                                                                                                                                                                                                                                                                                                                                                                                     |     |
| Cancer | epithelial neoplasia | epithelial neoplasia | 4.88E-02 | ABCG1,ACLY,ACOX2,ADAMTS9,ADM,AKT1,ALAD,ALDH2,ALDH7A1,ANGPTL2,ARF4,ARHGDIARID1A,ATG16L1,ATP1A1,ATP1A2,ATP1B3,ATP2A2,B4GALT5,BAD,BCL2L1,CA2,CACNB2,CALCO2,CALD1,CALM1 (includes others),CASP3,CCND1,CDK4,CES2,CIRBP,CLGN,COL4A1,CRELD1,CSPG4,CTDSPL,CTGF,CTNNAL1,CYP1B1,DACH1,DAPK2,DDX39A,DENND2A,DGCR8,DIAPH1,DLL1,DUSP5,E2F5,ECM1,EIF2C2,EMP1,EP300,EPAS1,EPB49,EPA4,ERBB2,EXTL3,FDFT1,FEN1,FSTL3,FXD1,FZD1,GAB2,GADD45A,GATA4,GOLGA5,GUCY1A3,GYPC,H2AFX,H2AFY,HAND1,HINT1,HOLF,HOOK2,HOXB2,HOXB6,IFIT1,IFNAR2,IGSF3,IL32,ITGA5,JAM3,JUP,KCNMB1,KDM3B,KEAP1,LRSAM1,LSM7,MAPK1,MBNL1,MCM3,MMP11,MT1X,MTA1,MTAP,MTHFR,MYLK,NDUFB4,NME1,NR2F1,NR3C2,NRIP1,NT5C3L,NTHL1,PAQR4,PCM1,PCP4,POLE4,POMC,PPAP2A,PRCC,PRDX1,PRDX6,PRNP,PTPN1,PTPRE,QPCT,RAB11FIP1,RAP1G | 157 |

|                            |            |                                             |          |                                                                                                                                                                                                                                                                                                                      |    |
|----------------------------|------------|---------------------------------------------|----------|----------------------------------------------------------------------------------------------------------------------------------------------------------------------------------------------------------------------------------------------------------------------------------------------------------------------|----|
|                            |            |                                             |          | AP,RARB,RBM39,R<br>CAN2,RNF150,RRA<br>S,RXRA,SBF1,SEC<br>31A,SELENBP1,SE<br>MA4D,SERPINF1,S<br>FRP1,SFRP5,SLC1<br>6A3,SLC27A1,SLC2<br>9A1,SMG1,SPPL2A,<br>SRM,STX2,STXBP6<br>,SYT13,TASP1,THB<br>S1,THBS4,TNFRSF<br>19,TRAK1,TRAPPC<br>2L,TSC1,TUBA1A,T<br>UBB2B,URI1,VASH<br>1,VCAN,VSTM2L,W<br>DR1,WLS,ZDHHC1<br>1 |    |
| Free Radical<br>Scavenging | metabolism | metabolism of<br>reactive oxygen<br>species | 4.99E-02 | AKT1,ALDH2,ARHG<br>DIA,BCL2L1,CASP3<br>,CCS,CYP1B1,DDIT<br>3,EPAS1,FCGR2A,<br>GAB2,IL32,ITGA5,IT<br>SN1,MAPK1,MYLK,<br>NLRX1,NOA1,NOX4<br>,NOXA1,NR3C2,PL<br>CG2,POMC,PRDX1,<br>PRDX6,PRNP,PTP<br>N1,RND3,RRAS,SE<br>RPINF1,SPAG9,TS<br>C1                                                                           | 32 |

**Table S9: Module locations of AF-associated candidate genes and top five correlated partners.**

| <b>Gene</b> | <b>Module</b>  | <b>Gene Partners (Correlation)</b>                                                |
|-------------|----------------|-----------------------------------------------------------------------------------|
| PITX2       | Green          | TTC37 (0.56)<br>PEX1 (0.55)<br>WDR26 (0.54)<br>CTBP1 (0.50)<br>FAM98A (0.49)      |
| ZFHX3       | Turquoise      | MRPL41 (-0.61)<br>TGFB111 (0.60)<br>PCBD1 (-0.60)<br>EFNA4 (-0.59)<br>CS (-0.58)  |
| PRRX1       | Turquoise      | MFAP4 (0.45)<br>PLAGL1 (0.45)<br>COL6A3 (0.42)<br>FAM117B (0.42)<br>COL5A1 (0.40) |
| SYNPO2L     | Cyan           | CYP2J2 (0.69)<br>MURC (0.65)<br>C2orf29 (0.57)<br>WEE1 (0.56)<br>STAT4 (0.55)     |
| SYNE2       | Turquoise      | ATP5O (0.49)<br>RHBDF1 (-0.49)<br>PSMD1 (0.48)<br>BOLA3 (0.47)<br>DLAT (0.46)     |
| CAV1        | Red            | WDR12 (0.53)<br>DIRC2 (0.53)<br>HMG20B (-0.51)<br>MRPS33 (0.51)<br>RPS3 (-0.50)   |
| C9orf3      | Turquoise      | CYC1 (0.66)<br>ENDOG (0.65)<br>MRPS15 (0.65)<br>UQCRC1 (0.65)<br>RPL8 (0.63)      |
| KCNN3       | Not in network | N/A                                                                               |
| HCN4        | Not in network | N/A                                                                               |
| WNT8A       | Not in network | N/A                                                                               |

**Table S10: Module assignments for genes in network.**

| Illumina_ID  | HGNC_Symbol | Module |
|--------------|-------------|--------|
| ILMN_1803398 | SRF         | black  |
| ILMN_1695945 | MEIS2       | black  |
| ILMN_1693014 | CEBPB       | black  |
| ILMN_1728360 | MED29       | black  |
| ILMN_1751886 | REC8        | black  |
| ILMN_2065022 | ARHGAP44    | black  |
| ILMN_1754757 | SCNN1D      | black  |
| ILMN_1750321 | TRANK1      | black  |
| ILMN_1802753 | TSSC4       | black  |
| ILMN_1704537 | PHGDH       | black  |
| ILMN_1766269 | HM13        | black  |
| ILMN_1785646 | PMP22       | black  |
| ILMN_1772910 | GAS1        | black  |
| ILMN_1735014 | KLF6        | black  |
| ILMN_2339266 | LAMA2       | black  |
| ILMN_2207393 | CNOT3       | black  |
| ILMN_1798602 | PCF11       | black  |
| ILMN_1798360 | CXCR7       | black  |
| ILMN_1681103 | AQP1        | black  |
| ILMN_1750518 | ALYREF      | black  |
| ILMN_1748538 | ALDH1A2     | black  |
| ILMN_1732985 | PHF20L1     | black  |
| ILMN_1672536 | FBLN1       | black  |
| ILMN_2128428 | DAB2        | black  |
| ILMN_1664440 | TP53BP1     | black  |
| ILMN_1765091 | ANKHD1      | black  |
| ILMN_1733256 | PSMD8       | black  |
| ILMN_1813840 | KDM1A       | black  |
| ILMN_1690125 | PDLIM7      | black  |
| ILMN_1716368 | CCDC111     | black  |
| ILMN_1722981 | TLR5        | black  |
| ILMN_1796925 | CXADR       | black  |
| ILMN_1749838 | MZF1        | black  |
| ILMN_1684497 | PYROXD2     | black  |
| ILMN_1751062 | SCARA5      | black  |
| ILMN_1761450 | DHRS4L2     | black  |
| ILMN_2183409 | SCARB1      | black  |
| ILMN_2410783 | GAA         | black  |
| ILMN_1681016 | SPNS1       | black  |
| ILMN_2121816 | GPR137B     | black  |
| ILMN_2258268 | GLRX2       | black  |
| ILMN_1811592 | ARHGAP21    | black  |

|              |          |       |
|--------------|----------|-------|
| ILMN_1737170 | FLII     | black |
| ILMN_1787843 | HSDL2    | black |
| ILMN_1722726 | ARHGAP32 | black |
| ILMN_1677505 | CCL21    | black |
| ILMN_1672660 | MBP      | black |
| ILMN_2081087 | HSPA12A  | black |
| ILMN_1811110 | TDRD9    | black |
| ILMN_1698463 | ILF3     | black |
| ILMN_1688011 | UPF1     | black |
| ILMN_2157510 | BLOC1S1  | black |
| ILMN_1741159 | MAP3K8   | black |
| ILMN_2098325 | C8orf33  | black |
| ILMN_1797384 | UROS     | black |
| ILMN_1729294 | RNF130   | black |
| ILMN_1898518 | GFRA1    | black |
| ILMN_2097790 | C1orf86  | black |
| ILMN_1678235 | KANSL1   | black |
| ILMN_1796762 | CCDC102A | black |
| ILMN_1799614 | PNPLA6   | black |
| ILMN_1794825 | ALDH3A2  | black |
| ILMN_1759232 | IRS1     | black |
| ILMN_1678961 | FRMD4A   | black |
| ILMN_1714622 | TNRC6A   | black |
| ILMN_1849186 | ZNF704   | black |
| ILMN_1730539 | NPHP3    | black |
| ILMN_1752668 | DAAM2    | black |
| ILMN_1775677 | TYSND1   | black |
| ILMN_1772876 | ZNF395   | black |
| ILMN_1789558 | ZC2HC1A  | black |
| ILMN_1798659 | CCDC28A  | black |
| ILMN_1670305 | SERPING1 | black |
| ILMN_1684054 | ASAH1    | black |
| ILMN_1691291 | PIGS     | black |
| ILMN_2050654 | SAV1     | black |
| ILMN_1677484 | SNAPC4   | black |
| ILMN_1802603 | RFNG     | black |
| ILMN_1769810 | ARL6IP5  | black |
| ILMN_2052871 | TMEM116  | black |
| ILMN_1689088 | COLEC12  | black |
| ILMN_2307740 | CD46     | black |
| ILMN_1750324 | IGFBP5   | black |
| ILMN_1685441 | ASAP3    | black |
| ILMN_1788356 | AKIP1    | black |
| ILMN_1756352 | LAMTOR2  | black |
| ILMN_1790782 | MED16    | black |

|              |          |       |
|--------------|----------|-------|
| ILMN_2338997 | PTP4A2   | black |
| ILMN_1800091 | RARRES1  | black |
| ILMN_1728071 | KRAS     | black |
| ILMN_1719695 | NFKBIZ   | black |
| ILMN_2415926 | THOC3    | black |
| ILMN_1671482 | GALM     | black |
| ILMN_1690682 | B3GALT4  | black |
| ILMN_1714327 | SETD1A   | black |
| ILMN_2396272 | PDCD4    | black |
| ILMN_1672565 | RG9MTD1  | black |
| ILMN_1774083 | TRIAP1   | black |
| ILMN_1808258 | HTR4     | black |
| ILMN_1808245 | SBSPON   | black |
| ILMN_1795937 | EZR      | black |
| ILMN_2099301 | SUN2     | black |
| ILMN_2369580 | NPRL3    | black |
| ILMN_1790311 | SEC23A   | black |
| ILMN_1660341 | LRPAP1   | black |
| ILMN_1770338 | TM4SF1   | black |
| ILMN_1761061 | PAX7     | black |
| ILMN_1789879 | WDR35    | black |
| ILMN_1743456 | ZCCHC14  | black |
| ILMN_1661335 | SPTBN1   | black |
| ILMN_2396813 | BABAM1   | black |
| ILMN_1718672 | NHP2     | black |
| ILMN_2061950 | RABGAP1  | black |
| ILMN_1726809 | BHLHE41  | black |
| ILMN_1776109 | ZNF622   | black |
| ILMN_1665004 | CASC3    | black |
| ILMN_2380163 | PTPRF    | black |
| ILMN_1805007 | SEMA4F   | black |
| ILMN_2080611 | PDSS1    | black |
| ILMN_1791296 | DPY19L1  | black |
| ILMN_1713380 | EIF2B2   | black |
| ILMN_1803254 | SMEK1    | black |
| ILMN_1676822 | C2orf40  | black |
| ILMN_1654398 | RGL1     | black |
| ILMN_2175317 | CYP4X1   | black |
| ILMN_2394561 | IRF2BP2  | black |
| ILMN_1759910 | SERPINA5 | black |
| ILMN_1691809 | PSMA1    | black |
| ILMN_1655625 | GPATCH1  | black |
| ILMN_1670490 | PDPN     | black |
| ILMN_1678692 | MPRIP    | black |
| ILMN_1741632 | RAB3IL1  | black |

|              |          |       |
|--------------|----------|-------|
| ILMN_1692473 | PRMT1    | black |
| ILMN_1708029 | TMEM8B   | black |
| ILMN_2337655 | WARS     | black |
| ILMN_1781400 | SLC7A2   | black |
| ILMN_1777881 | TSPAN17  | black |
| ILMN_1699695 | TNFRSF21 | black |
| ILMN_1682226 | CLDN15   | black |
| ILMN_1729509 | C1orf43  | black |
| ILMN_1701455 | FBXO6    | black |
| ILMN_1668092 | ESAM     | black |
| ILMN_1809708 | KCTD21   | black |
| ILMN_1652797 | FAM174B  | black |
| ILMN_1746396 | CTNNB1   | black |
| ILMN_1656287 | SPOCK2   | black |
| ILMN_1714067 | NTRK2    | black |
| ILMN_1798992 | MYL3     | black |
| ILMN_1804955 | CTSF     | black |
| ILMN_2112301 | DRAP1    | black |
| ILMN_1706511 | TEF      | black |
| ILMN_1705685 | MEIS1    | black |
| ILMN_1743275 | SH3RF3   | black |
| ILMN_1660282 | POPDC2   | black |
| ILMN_1668345 | OAF      | black |
| ILMN_1760143 | ADRM1    | black |
| ILMN_2375651 | SCNM1    | black |
| ILMN_1756999 | RBL2     | black |
| ILMN_1656951 | APCDD1   | black |
| ILMN_1663667 | FLAD1    | black |
| ILMN_1726755 | COPS4    | black |
| ILMN_1732158 | FMO2     | black |
| ILMN_1733110 | RASSF7   | black |
| ILMN_1729976 | CHAMP1   | black |
| ILMN_1672908 | TWIST1   | black |
| ILMN_1752510 | FAM13A   | black |
| ILMN_1730995 | AFAP1L2  | black |
| ILMN_2134062 | ALKBH3   | black |
| ILMN_1680955 | AURKA    | black |
| ILMN_1679797 | ADARB1   | black |
| ILMN_1796968 | INTS5    | black |
| ILMN_1782247 | KAT2A    | black |
| ILMN_1673543 | PGM2     | black |
| ILMN_2154287 | ACCS     | black |
| ILMN_1696713 | POLA2    | black |
| ILMN_1680591 | RTKN     | black |
| ILMN_1729161 | NOTCH1   | black |

|              |          |       |
|--------------|----------|-------|
| ILMN_1761260 | COBLL1   | black |
| ILMN_1813572 | IL16     | black |
| ILMN_1662243 | ING1     | black |
| ILMN_1703852 | EFNB2    | black |
| ILMN_1734897 | SLC4A4   | black |
| ILMN_1667030 | HSBP1    | black |
| ILMN_1750400 | C19orf66 | black |
| ILMN_2248589 | DHX40    | black |
| ILMN_1713496 | ST3GAL5  | black |
| ILMN_1728984 | PA2G4    | black |
| ILMN_1660986 | PER3     | black |
| ILMN_1810844 | RARRES2  | black |
| ILMN_1705241 | TDRD7    | black |
| ILMN_1779399 | SNRPA    | black |
| ILMN_1808661 | TOMM5    | black |
| ILMN_1788701 | PSIP1    | black |
| ILMN_1718932 | MTRR     | black |
| ILMN_1719064 | KCTD10   | black |
| ILMN_1690802 | TRMT112  | black |
| ILMN_1744191 | SLC6A1   | black |
| ILMN_1750052 | NOP14    | black |
| ILMN_1713182 | C3       | black |
| ILMN_1703531 | S1PR3    | black |
| ILMN_1800412 | BMP1     | black |
| ILMN_1692664 | PRR5     | black |
| ILMN_1764168 | STXBP3   | black |
| ILMN_1694780 | GCHFR    | black |
| ILMN_2334587 | HNRNPC   | black |
| ILMN_1749868 | FAM171A1 | black |
| ILMN_1684789 | CCDC101  | black |
| ILMN_2368292 | TSEN34   | black |
| ILMN_1652762 | HIC2     | black |
| ILMN_1748840 | CALB2    | black |
| ILMN_1720889 | MSMO1    | black |
| ILMN_1693259 | PDCD6IP  | black |
| ILMN_2229877 | PCDH18   | black |
| ILMN_1694752 | PARG     | black |
| ILMN_1787673 | PLL      | black |
| ILMN_1758672 | FAM107B  | black |
| ILMN_2414878 | STXBP1   | black |
| ILMN_1728471 | ARFGEF1  | black |
| ILMN_1764764 | MUM1     | black |
| ILMN_1652777 | CDC42EP2 | black |
| ILMN_2388800 | PPAP2B   | black |
| ILMN_2349610 | DPH3     | black |

|              |          |       |
|--------------|----------|-------|
| ILMN_1781010 | ARHGEF3  | black |
| ILMN_1784175 | KIAA1383 | black |
| ILMN_1660086 | MYH11    | black |
| ILMN_1758811 | IMPA1    | black |
| ILMN_1780349 | PRG4     | black |
| ILMN_2398865 | VPS13C   | black |
| ILMN_1723625 | MAP4K2   | black |
| ILMN_2318733 | BNIP1    | black |
| ILMN_1802973 | ANAPC4   | black |
| ILMN_1711608 | SSBP2    | black |
| ILMN_1773620 | SMARCC2  | black |
| ILMN_1709348 | ALDH1A1  | black |
| ILMN_1723048 | GJC2     | black |
| ILMN_2389376 | DCAF11   | black |
| ILMN_1683305 | COMMD2   | black |
| ILMN_1760049 | SERGEF   | black |
| ILMN_2177965 | RPS19BP1 | black |
| ILMN_1715804 | PITPNA   | black |
| ILMN_2205963 | C10orf54 | black |
| ILMN_1785635 | BRD3     | black |
| ILMN_1714108 | TP53INP1 | black |
| ILMN_1792910 | MNT      | black |
| ILMN_1694950 | MRPL28   | black |
| ILMN_1740216 | ERCC3    | black |
| ILMN_2130180 | RPL13P5  | black |
| ILMN_1682738 | SMAD3    | black |
| ILMN_1736742 | GLT25D2  | black |
| ILMN_1655635 | METTL3   | black |
| ILMN_1669709 | TMEM108  | black |
| ILMN_1724581 | EDC3     | black |
| ILMN_1745784 | ZNF324   | black |
| ILMN_1771599 | PLOD2    | black |
| ILMN_1752478 | DHRS3    | black |
| ILMN_1764754 | RAMP1    | black |
| ILMN_1739345 | C11orf48 | black |
| ILMN_1736751 | VPS26B   | black |
| ILMN_1815679 | COL6A6   | black |
| ILMN_2405305 | ARNTL    | black |
| ILMN_1736184 | GSTM3    | black |
| ILMN_1790315 | C7orf63  | black |
| ILMN_1680339 | PDGFRL   | black |
| ILMN_1761721 | VPS35    | black |
| ILMN_1727692 | TRIT1    | black |
| ILMN_1651438 | ZFPM1    | black |
| ILMN_1669362 | IGFBP6   | black |

|              |          |       |
|--------------|----------|-------|
| ILMN_2123730 | TBC1D22B | black |
| ILMN_1685631 | MAU2     | black |
| ILMN_1721093 | TAF10    | black |
| ILMN_1811387 | TFF3     | black |
| ILMN_2380566 | SIAH1    | black |
| ILMN_2165993 | ITLN1    | black |
| ILMN_1702384 | ZNF706   | black |
| ILMN_1803348 | EHBP1    | black |
| ILMN_1721344 | MOB3A    | blue  |
| ILMN_2143148 | TM2D1    | blue  |
| ILMN_1680626 | PDIA6    | blue  |
| ILMN_1799725 | DOCK2    | blue  |
| ILMN_1751097 | CREB3L2  | blue  |
| ILMN_2208903 | CD52     | blue  |
| ILMN_1694140 | AFAP1L1  | blue  |
| ILMN_2122953 | CISD1    | blue  |
| ILMN_1722622 | CD163    | blue  |
| ILMN_2068435 | ZNF700   | blue  |
| ILMN_1730809 | SLC29A2  | blue  |
| ILMN_1779076 | HINT3    | blue  |
| ILMN_1788462 | AMD1     | blue  |
| ILMN_1654612 | ZNF589   | blue  |
| ILMN_2359742 | CTSB     | blue  |
| ILMN_2174127 | DCBLD2   | blue  |
| ILMN_2400759 | CPVL     | blue  |
| ILMN_1669631 | GLRB     | blue  |
| ILMN_1723962 | LXN      | blue  |
| ILMN_1724533 | LY96     | blue  |
| ILMN_1795429 | VCL      | blue  |
| ILMN_1711994 | TCIRG1   | blue  |
| ILMN_1737146 | TRAM1    | blue  |
| ILMN_1728049 | S100A16  | blue  |
| ILMN_2206344 | NDST2    | blue  |
| ILMN_1750101 | S100A11  | blue  |
| ILMN_2059549 | SYK      | blue  |
| ILMN_2405602 | OSBPL1A  | blue  |
| ILMN_1800311 | HSF2     | blue  |
| ILMN_1781819 | PAPSS1   | blue  |
| ILMN_1690921 | STAT2    | blue  |
| ILMN_2386982 | PRKCZ    | blue  |
| ILMN_1666594 | IRF8     | blue  |
| ILMN_1767542 | THAP10   | blue  |
| ILMN_1719471 | MSH3     | blue  |
| ILMN_1760792 | KLHL7    | blue  |
| ILMN_1658830 | WBP1L    | blue  |

|              |          |      |
|--------------|----------|------|
| ILMN_2389151 | UGP2     | blue |
| ILMN_2130635 | FOXRED2  | blue |
| ILMN_1669831 | SLC18B1  | blue |
| ILMN_1668185 | ZNF282   | blue |
| ILMN_1789196 | TPM2     | blue |
| ILMN_1781280 | TECRL    | blue |
| ILMN_1772700 | TMEM18   | blue |
| ILMN_2359453 | ERGIC3   | blue |
| ILMN_2139100 | SHISA5   | blue |
| ILMN_1722491 | APRT     | blue |
| ILMN_1725427 | B2M      | blue |
| ILMN_1802780 | CD163L1  | blue |
| ILMN_1792173 | TUBGCP4  | blue |
| ILMN_1687538 | ETS1     | blue |
| ILMN_1693766 | CEP135   | blue |
| ILMN_2387952 | FAM134B  | blue |
| ILMN_1741371 | TMEM8A   | blue |
| ILMN_1689655 | HLA-DRA  | blue |
| ILMN_1804988 | MOAP1    | blue |
| ILMN_1683658 | FKBP1A   | blue |
| ILMN_1722698 | RCHY1    | blue |
| ILMN_1769634 | STRA13   | blue |
| ILMN_1809099 | IL33     | blue |
| ILMN_1747744 | LHFPL2   | blue |
| ILMN_1685834 | AMPH     | blue |
| ILMN_1788211 | SNX19    | blue |
| ILMN_2056760 | MKRN2    | blue |
| ILMN_2373062 | RHBDF2   | blue |
| ILMN_1674985 | TMEM51   | blue |
| ILMN_1783337 | DECR2    | blue |
| ILMN_1793033 | RBM28    | blue |
| ILMN_2053679 | ACADM    | blue |
| ILMN_1688103 | CTNNBIP1 | blue |
| ILMN_2161746 | TRIP10   | blue |
| ILMN_1679209 | HSPA9    | blue |
| ILMN_1769665 | RAB5C    | blue |
| ILMN_1742618 | XAF1     | blue |
| ILMN_1712432 | PSMD2    | blue |
| ILMN_2326509 | CASP1    | blue |
| ILMN_2306565 | MTX2     | blue |
| ILMN_1698673 | EFCAB7   | blue |
| ILMN_2347349 | CCNB1IP1 | blue |
| ILMN_2394571 | FBXW11   | blue |
| ILMN_1789751 | MFSD1    | blue |
| ILMN_2226955 | VOPP1    | blue |

|              |           |      |
|--------------|-----------|------|
| ILMN_1695386 | RAD51C    | blue |
| ILMN_1764850 | HPCAL1    | blue |
| ILMN_1813236 | C6orf136  | blue |
| ILMN_1795089 | RASAL3    | blue |
| ILMN_1679640 | FXR1      | blue |
| ILMN_1721035 | MS4A6A    | blue |
| ILMN_2134039 | ACN9      | blue |
| ILMN_1815734 | FCHSD2    | blue |
| ILMN_1741954 | SMYD3     | blue |
| ILMN_1709814 | NMRAL1    | blue |
| ILMN_1695311 | HLA-DMA   | blue |
| ILMN_2312340 | LILRB2    | blue |
| ILMN_2046730 | S100A10   | blue |
| ILMN_1715748 | FLNC      | blue |
| ILMN_1723632 | PIGC      | blue |
| ILMN_1814808 | BFAR      | blue |
| ILMN_2041725 | MYOZ2     | blue |
| ILMN_1726199 | ZNF594    | blue |
| ILMN_2391512 | NAAA      | blue |
| ILMN_2098126 | CCL5      | blue |
| ILMN_1654072 | CX3CL1    | blue |
| ILMN_1718718 | MKKS      | blue |
| ILMN_2112256 | TNFRSF4   | blue |
| ILMN_1803953 | LINC00493 | blue |
| ILMN_1652525 | FAM125B   | blue |
| ILMN_1692962 | CTDSP2    | blue |
| ILMN_2155228 | CRLF3     | blue |
| ILMN_1761684 | WNK2      | blue |
| ILMN_1773369 | MRPL48    | blue |
| ILMN_2149935 | CC2D1B    | blue |
| ILMN_1677085 | RGS19     | blue |
| ILMN_1815134 | PI4K2B    | blue |
| ILMN_1737972 | TSPYL5    | blue |
| ILMN_1777061 | ZSWIM6    | blue |
| ILMN_2407464 | FASTK     | blue |
| ILMN_1726210 | GPIHBP1   | blue |
| ILMN_1724230 | FRG1      | blue |
| ILMN_1709334 | TM9SF1    | blue |
| ILMN_1663160 | ZNF337    | blue |
| ILMN_1808405 | HLA-DQA1  | blue |
| ILMN_1781419 | C11orf73  | blue |
| ILMN_1803945 | HCP5      | blue |
| ILMN_1652631 | GLIPR2    | blue |
| ILMN_1666739 | RBM15     | blue |
| ILMN_2233604 | ECSIT     | blue |

|              |          |      |
|--------------|----------|------|
| ILMN_1682818 | TLL3     | blue |
| ILMN_2230035 | BBS2     | blue |
| ILMN_1701131 | C2orf49  | blue |
| ILMN_1760305 | FBRSL1   | blue |
| ILMN_2286514 | GTPBP8   | blue |
| ILMN_2364674 | TRPT1    | blue |
| ILMN_1759549 | SRGAP2   | blue |
| ILMN_1776347 | TCP1     | blue |
| ILMN_2331082 | MS4A7    | blue |
| ILMN_1665877 | RNF149   | blue |
| ILMN_1745397 | OAS3     | blue |
| ILMN_1708588 | ADCY5    | blue |
| ILMN_1670172 | WDR33    | blue |
| ILMN_1741477 | SMAD4    | blue |
| ILMN_1720048 | CCL2     | blue |
| ILMN_2194448 | STT3B    | blue |
| ILMN_1765258 | HLA-E    | blue |
| ILMN_1797531 | PRKAG2   | blue |
| ILMN_1772703 | OTUD6B   | blue |
| ILMN_1674411 | CKAP2    | blue |
| ILMN_1752802 | CLPTM1L  | blue |
| ILMN_1686623 | CSF1R    | blue |
| ILMN_1727332 | ATPIF1   | blue |
| ILMN_1787657 | CLDN12   | blue |
| ILMN_1738491 | SNX30    | blue |
| ILMN_1741003 | ANXA5    | blue |
| ILMN_1761463 | EFHD2    | blue |
| ILMN_1713174 | TCP11L1  | blue |
| ILMN_1775762 | GNAI2    | blue |
| ILMN_1803110 | SF3B3    | blue |
| ILMN_2333670 | RNASE1   | blue |
| ILMN_1808095 | RNF41    | blue |
| ILMN_1800855 | PPTC7    | blue |
| ILMN_1674038 | CTSD     | blue |
| ILMN_1733603 | NDUFC1   | blue |
| ILMN_2229940 | PRADC1   | blue |
| ILMN_2356284 | PFDN5    | blue |
| ILMN_1772218 | HLA-DPA1 | blue |
| ILMN_1697268 | EMILIN2  | blue |
| ILMN_1796180 | CRY2     | blue |
| ILMN_1755221 | LMAN2L   | blue |
| ILMN_2260991 | TSPO     | blue |
| ILMN_1809931 | NDRG1    | blue |
| ILMN_1809477 | CARHSP1  | blue |
| ILMN_1814650 | TRAPPC4  | blue |

|              |          |      |
|--------------|----------|------|
| ILMN_1705151 | SF3A3    | blue |
| ILMN_1677768 | POR      | blue |
| ILMN_1673352 | IFITM2   | blue |
| ILMN_1736567 | CD74     | blue |
| ILMN_1655126 | PI4KAP2  | blue |
| ILMN_1678904 | ENO3     | blue |
| ILMN_1762312 | FOXRED1  | blue |
| ILMN_1789830 | CFLAR    | blue |
| ILMN_2228710 | PDCD5    | blue |
| ILMN_1760201 | DNMT1    | blue |
| ILMN_1659240 | MTMR14   | blue |
| ILMN_1741736 | DDX28    | blue |
| ILMN_1728107 | GNG7     | blue |
| ILMN_1744835 | MRPL21   | blue |
| ILMN_1727402 | HCLS1    | blue |
| ILMN_1698019 | LGMN     | blue |
| ILMN_1782954 | UBE2K    | blue |
| ILMN_1761322 | FHOD3    | blue |
| ILMN_1758658 | FADD     | blue |
| ILMN_2383349 | STEAP3   | blue |
| ILMN_1713129 | TTF1     | blue |
| ILMN_1720124 | RCC2     | blue |
| ILMN_1731418 | SP110    | blue |
| ILMN_2397721 | GLB1     | blue |
| ILMN_1790625 | CBX3     | blue |
| ILMN_1655206 | ZBTB34   | blue |
| ILMN_2087656 | SLCO2B1  | blue |
| ILMN_1720053 | ZFAND3   | blue |
| ILMN_1748884 | TOB2     | blue |
| ILMN_2082209 | TOX2     | blue |
| ILMN_1775405 | ARL4A    | blue |
| ILMN_1706687 | KLHL5    | blue |
| ILMN_1761797 | CSTB     | blue |
| ILMN_2293992 | RAB28    | blue |
| ILMN_1785902 | C1QC     | blue |
| ILMN_1706261 | SLCO3A1  | blue |
| ILMN_1752741 | TRIM23   | blue |
| ILMN_1676548 | BZW2     | blue |
| ILMN_1723847 | CILP     | blue |
| ILMN_1651513 | SKIV2L2  | blue |
| ILMN_1801905 | ATG4D    | blue |
| ILMN_2390609 | ANK3     | blue |
| ILMN_1706960 | KIAA1217 | blue |
| ILMN_1807206 | DHRS1    | blue |
| ILMN_2309848 | FXYD5    | blue |

|              |          |      |
|--------------|----------|------|
| ILMN_1696494 | CMTM6    | blue |
| ILMN_2397954 | PARP3    | blue |
| ILMN_1719759 | TNC      | blue |
| ILMN_1759801 | DPP8     | blue |
| ILMN_1680424 | CTSG     | blue |
| ILMN_1810922 | PCNT     | blue |
| ILMN_1653205 | C8orf59  | blue |
| ILMN_1748093 | PAFAH1B3 | blue |
| ILMN_2109197 | EPB41L3  | blue |
| ILMN_2317348 | APTX     | blue |
| ILMN_1678143 | ARHGDIB  | blue |
| ILMN_1682736 | BRD7P3   | blue |
| ILMN_1729533 | APOA1BP  | blue |
| ILMN_1699931 | HCST     | blue |
| ILMN_1699859 | GNPAT    | blue |
| ILMN_1778723 | AMICA1   | blue |
| ILMN_1754562 | ARHGEF17 | blue |
| ILMN_1659761 | SNX29    | blue |
| ILMN_1733863 | FAM100A  | blue |
| ILMN_1712389 | CKLF     | blue |
| ILMN_1736054 | SUB1     | blue |
| ILMN_1662358 | MX1      | blue |
| ILMN_2410929 | PAPSS2   | blue |
| ILMN_2315208 | CAMK2B   | blue |
| ILMN_1682428 | HENMT1   | blue |
| ILMN_2116299 | FAM110D  | blue |
| ILMN_1665538 | SKP2     | blue |
| ILMN_1735058 | CHST12   | blue |
| ILMN_1659462 | DUSP23   | blue |
| ILMN_1702301 | DOCK10   | blue |
| ILMN_1667791 | PPFIA4   | blue |
| ILMN_1714765 | STRADBP1 | blue |
| ILMN_1717524 | LIPT1    | blue |
| ILMN_1680996 | ALOX5    | blue |
| ILMN_1719392 | FH       | blue |
| ILMN_1760890 | SEPN1    | blue |
| ILMN_1671791 | PCK2     | blue |
| ILMN_1783956 | ATP8B4   | blue |
| ILMN_1683096 | ASB1     | blue |
| ILMN_2400292 | MAPK9    | blue |
| ILMN_1671281 | RNASEL   | blue |
| ILMN_1801710 | APBB1IP  | blue |
| ILMN_1732049 | DPM2     | blue |
| ILMN_2413158 | PODXL    | blue |
| ILMN_1688180 | ASPSCR1  | blue |

|              |          |      |
|--------------|----------|------|
| ILMN_1741459 | CDK10    | blue |
| ILMN_2229032 | NME6     | blue |
| ILMN_2387636 | EIF6     | blue |
| ILMN_1724250 | GRN      | blue |
| ILMN_1869087 | CLOCK    | blue |
| ILMN_1758146 | SIRPA    | blue |
| ILMN_1774077 | GBP2     | blue |
| ILMN_2376108 | PSMB9    | blue |
| ILMN_1770911 | NRSN2    | blue |
| ILMN_1714148 | NAIF1    | blue |
| ILMN_2390853 | CTSH     | blue |
| ILMN_2314417 | HYAL1    | blue |
| ILMN_2195482 | CACNB3   | blue |
| ILMN_1709440 | CPM      | blue |
| ILMN_1811555 | SWI5     | blue |
| ILMN_2407811 | NEURL4   | blue |
| ILMN_1752520 | SLFN11   | blue |
| ILMN_1803197 | RAB3IP   | blue |
| ILMN_1745471 | IRF9     | blue |
| ILMN_1773763 | MTA2     | blue |
| ILMN_1703330 | FEM1C    | blue |
| ILMN_1736112 | ARHGAP10 | blue |
| ILMN_1674560 | GBA2     | blue |
| ILMN_1686392 | NBAS     | blue |
| ILMN_1746378 | GHDC     | blue |
| ILMN_1752728 | FUCA1    | blue |
| ILMN_2134224 | ATP13A1  | blue |
| ILMN_1764709 | MAFB     | blue |
| ILMN_1813846 | P2RX4    | blue |
| ILMN_1811327 | MRPL27   | blue |
| ILMN_1769520 | UBE2L6   | blue |
| ILMN_1699767 | PDE8A    | blue |
| ILMN_1681857 | MYL7     | blue |
| ILMN_1736327 | CDC42EP3 | blue |
| ILMN_1773470 | ST5      | blue |
| ILMN_2054019 | ISG15    | blue |
| ILMN_2401978 | STAT3    | blue |
| ILMN_1778764 | BUB3     | blue |
| ILMN_1695821 | ACTR1B   | blue |
| ILMN_1776522 | SLC50A1  | blue |
| ILMN_1662896 | WDR11    | blue |
| ILMN_1665775 | MARC2    | blue |
| ILMN_1698934 | CMTM7    | blue |
| ILMN_1707286 | PLBD1    | blue |
| ILMN_2252136 | YWHAE    | blue |

|              |          |      |
|--------------|----------|------|
| ILMN_1686152 | GGA2     | blue |
| ILMN_2115434 | RAB32    | blue |
| ILMN_2334296 | IL18BP   | blue |
| ILMN_2385178 | MIB2     | blue |
| ILMN_2069945 | SNRNP27  | blue |
| ILMN_2066020 | TCEB1    | blue |
| ILMN_1715496 | HTR2A    | blue |
| ILMN_2090105 | TAGLN2   | blue |
| ILMN_1658926 | NOTCH3   | blue |
| ILMN_1654583 | CHD1     | blue |
| ILMN_1725314 | GBP3     | blue |
| ILMN_2109708 | TYMP     | blue |
| ILMN_1747119 | FBXO46   | blue |
| ILMN_1805737 | PFKP     | blue |
| ILMN_1663444 | LIN7B    | blue |
| ILMN_2096654 | COMMD4   | blue |
| ILMN_1738704 | TRIM26   | blue |
| ILMN_2302716 | ALDH18A1 | blue |
| ILMN_1740960 | MACROD1  | blue |
| ILMN_1778977 | TYROBP   | blue |
| ILMN_1766359 | GATAD2B  | blue |
| ILMN_1741755 | TRIM29   | blue |
| ILMN_1809433 | XBP1     | blue |
| ILMN_1694106 | GPD1L    | blue |
| ILMN_1744308 | DHX33    | blue |
| ILMN_2128795 | LRIG1    | blue |
| ILMN_1682993 | NKG7     | blue |
| ILMN_1708147 | TBPL1    | blue |
| ILMN_1659075 | HLA-DOA  | blue |
| ILMN_1722533 | KATNAL1  | blue |
| ILMN_1710124 | CMTM8    | blue |
| ILMN_1675062 | MYL9     | blue |
| ILMN_2136455 | EOGT     | blue |
| ILMN_1664168 | SLC25A11 | blue |
| ILMN_1726589 | CD248    | blue |
| ILMN_1806787 | CSDC2    | blue |
| ILMN_1730620 | ARRB1    | blue |
| ILMN_1779015 | ZNF467   | blue |
| ILMN_2405400 | GRK4     | blue |
| ILMN_1751161 | COL7A1   | blue |
| ILMN_1811560 | SUGP1    | blue |
| ILMN_1803278 | PGM5     | blue |
| ILMN_1745374 | IFI35    | blue |
| ILMN_2343624 | METTTL13 | blue |
| ILMN_1722738 | ROGDI    | blue |

|              |          |      |
|--------------|----------|------|
| ILMN_1777325 | STAT1    | blue |
| ILMN_1660451 | STARD13  | blue |
| ILMN_1760062 | IFI44    | blue |
| ILMN_2225537 | PTGR1    | blue |
| ILMN_1742250 | CCNH     | blue |
| ILMN_1784709 | GNPDA1   | blue |
| ILMN_2330307 | SLC43A3  | blue |
| ILMN_2393763 | ARPC4    | blue |
| ILMN_1696254 | CYB5D2   | blue |
| ILMN_1775074 | TUBGCP2  | blue |
| ILMN_1676372 | CD209    | blue |
| ILMN_1726359 | NECAP1   | blue |
| ILMN_1717809 | RNF24    | blue |
| ILMN_1802053 | ZNF91    | blue |
| ILMN_1706273 | MOB2     | blue |
| ILMN_1742450 | TAPBP    | blue |
| ILMN_1669696 | ZNF792   | blue |
| ILMN_2391750 | SFMBT1   | blue |
| ILMN_1701613 | RARRES3  | blue |
| ILMN_1658885 | DAGLB    | blue |
| ILMN_2410038 | FAM111A  | blue |
| ILMN_2201966 | N4BP1    | blue |
| ILMN_1736234 | CHTOP    | blue |
| ILMN_1800573 | RPS21    | blue |
| ILMN_1809842 | TNNC1    | blue |
| ILMN_1660923 | HLA-P    | blue |
| ILMN_1737685 | CRLS1    | blue |
| ILMN_1768751 | MTA3     | blue |
| ILMN_1672596 | BCAR1    | blue |
| ILMN_1855746 | VPS13A   | blue |
| ILMN_1784320 | ELMO1    | blue |
| ILMN_1783276 | NEXN     | blue |
| ILMN_1749641 | FBXO3    | blue |
| ILMN_1712298 | ANKRD46  | blue |
| ILMN_2145518 | TMEM126B | blue |
| ILMN_1697363 | C20orf27 | blue |
| ILMN_1675483 | ANKMY1   | blue |
| ILMN_1786429 | LPAR6    | blue |
| ILMN_1702858 | ADHFE1   | blue |
| ILMN_1725946 | IRF6     | blue |
| ILMN_1736256 | CALR     | blue |
| ILMN_1708427 | KPNA3    | blue |
| ILMN_1720476 | PHF2     | blue |
| ILMN_1750011 | EXOC7    | blue |
| ILMN_1712075 | SYNM     | blue |

|              |          |      |
|--------------|----------|------|
| ILMN_1735979 | BCKDHA   | blue |
| ILMN_1713636 | S100A6   | blue |
| ILMN_1741204 | KLHDC2   | blue |
| ILMN_1669617 | GRB10    | blue |
| ILMN_1773073 | PHYH     | blue |
| ILMN_1671565 | RNASSET2 | blue |
| ILMN_2374778 | DUT      | blue |
| ILMN_2204754 | TMX4     | blue |
| ILMN_2367275 | BCL7B    | blue |
| ILMN_1712950 | PFN1     | blue |
| ILMN_2376408 | DPM3     | blue |
| ILMN_2288070 | FTO      | blue |
| ILMN_1662198 | RANGAP1  | blue |
| ILMN_2307903 | VCAM1    | blue |
| ILMN_1767556 | C10orf10 | blue |
| ILMN_1788254 | PGAM5    | blue |
| ILMN_1661622 | TBC1D7   | blue |
| ILMN_1795930 | PTGER4   | blue |
| ILMN_2180827 | MEPCE    | blue |
| ILMN_1788384 | TMEM245  | blue |
| ILMN_2045994 | SEPW1    | blue |
| ILMN_1685856 | FAM92A1  | blue |
| ILMN_1813833 | NARFL    | blue |
| ILMN_1687922 | RP9      | blue |
| ILMN_1706342 | ZNF746   | blue |
| ILMN_1746578 | SLC23A2  | blue |
| ILMN_1712532 | CARD9    | blue |
| ILMN_1676515 | IMPDH1   | blue |
| ILMN_1781803 | FIZ1     | blue |
| ILMN_1786326 | KCTD15   | blue |
| ILMN_1733931 | PDCD6    | blue |
| ILMN_1775943 | BRMS1L   | blue |
| ILMN_2222074 | PTPN12   | blue |
| ILMN_1681837 | POLR3A   | blue |
| ILMN_1794968 | LRRC28   | blue |
| ILMN_2315780 | TACC2    | blue |
| ILMN_1799467 | SAMD9L   | blue |
| ILMN_1787885 | NUDT18   | blue |
| ILMN_1695763 | PDIA5    | blue |
| ILMN_1753745 | HDDC2    | blue |
| ILMN_1713934 | LITAF    | blue |
| ILMN_1769250 | ARFGAP2  | blue |
| ILMN_2138435 | MRPS27   | blue |
| ILMN_2304186 | MITF     | blue |
| ILMN_1656621 | CHMP2A   | blue |

|              |         |      |
|--------------|---------|------|
| ILMN_1672503 | DPYSL2  | blue |
| ILMN_1775486 | SSPN    | blue |
| ILMN_1672547 | MYO9B   | blue |
| ILMN_2349006 | USP21   | blue |
| ILMN_1803277 | MVP     | blue |
| ILMN_2313856 | OSBPL9  | blue |
| ILMN_2094313 | ZDHHC1  | blue |
| ILMN_2407346 | LDHD    | blue |
| ILMN_2392143 | TRAF6   | blue |
| ILMN_1726769 | CNDP2   | blue |
| ILMN_1698487 | SDHD    | blue |
| ILMN_1805177 | GREB1L  | blue |
| ILMN_1748819 | MRPL22  | blue |
| ILMN_1657111 | AHNAK2  | blue |
| ILMN_2137066 | ZNF7    | blue |
| ILMN_2158902 | PXDNL   | blue |
| ILMN_2203950 | HLA-A   | blue |
| ILMN_1791409 | ITGA7   | blue |
| ILMN_1714489 | CIB2    | blue |
| ILMN_1656393 | PPP2R3A | blue |
| ILMN_1775111 | SND1    | blue |
| ILMN_2402805 | TRPC4AP | blue |
| ILMN_1812031 | PALM    | blue |
| ILMN_1678215 | RHOJ    | blue |
| ILMN_1808333 | PPP1R7  | blue |
| ILMN_1756920 | ADAM15  | blue |
| ILMN_1732776 | NUP98   | blue |
| ILMN_1792014 | FAM70B  | blue |
| ILMN_2100437 | HBB     | blue |
| ILMN_1679268 | PELI1   | blue |
| ILMN_1757440 | FAM69B  | blue |
| ILMN_2242463 | CTSC    | blue |
| ILMN_2381296 | GSTZ1   | blue |
| ILMN_1679880 | THOC6   | blue |
| ILMN_1769789 | MLIP    | blue |
| ILMN_1776005 | OSTC    | blue |
| ILMN_1716862 | PPM1B   | blue |
| ILMN_1851492 | MIR4720 | blue |
| ILMN_1732923 | SIPA1L2 | blue |
| ILMN_1679796 | TOMM20  | blue |
| ILMN_1766185 | AXIN1   | blue |
| ILMN_1751571 | RAD23A  | blue |
| ILMN_1803194 | GALK1   | blue |
| ILMN_1730816 | GPR162  | blue |
| ILMN_1690397 | DYNC111 | blue |

|              |          |      |
|--------------|----------|------|
| ILMN_2101885 | TUBB     | blue |
| ILMN_1734833 | NBN      | blue |
| ILMN_1719543 | MAF      | blue |
| ILMN_1669878 | GUSB     | blue |
| ILMN_2237428 | SCD5     | blue |
| ILMN_1729095 | PDZD2    | blue |
| ILMN_1738742 | PLAT     | blue |
| ILMN_2104141 | FGD5     | blue |
| ILMN_1698732 | PALLD    | blue |
| ILMN_1727390 | ATPAF2   | blue |
| ILMN_1792473 | AIF1     | blue |
| ILMN_1765446 | EMP3     | blue |
| ILMN_1776105 | PSPH     | blue |
| ILMN_1781636 | VWA1     | blue |
| ILMN_1778078 | VPS16    | blue |
| ILMN_2347888 | LARP4    | blue |
| ILMN_1729487 | GMPR     | blue |
| ILMN_1809212 | HPR      | blue |
| ILMN_1767642 | C11orf46 | blue |
| ILMN_1672389 | CRYZ     | blue |
| ILMN_2101375 | CCDC77   | blue |
| ILMN_1660436 | HSPA1B   | blue |
| ILMN_2123743 | FCER1G   | blue |
| ILMN_1766528 | SLC25A36 | blue |
| ILMN_1723912 | IFI44L   | blue |
| ILMN_1710937 | IFI16    | blue |
| ILMN_2402341 | MAPK3    | blue |
| ILMN_1690034 | SOD3     | blue |
| ILMN_2232368 | PCIF1    | blue |
| ILMN_2379931 | PIGO     | blue |
| ILMN_1702489 | TRIM63   | blue |
| ILMN_2175912 | ITGB2    | blue |
| ILMN_1679093 | ZNF581   | blue |
| ILMN_1705442 | CMTM3    | blue |
| ILMN_1797875 | ALOX5AP  | blue |
| ILMN_1796629 | EDNRA    | blue |
| ILMN_2394250 | PLEKHA1  | blue |
| ILMN_1755077 | HEBP2    | blue |
| ILMN_1797974 | AIG1     | blue |
| ILMN_1777565 | TAP2     | blue |
| ILMN_1808568 | PYCR2    | blue |
| ILMN_2058782 | IFI27    | blue |
| ILMN_1772278 | TANC1    | blue |
| ILMN_1763000 | ADAP2    | blue |
| ILMN_1684306 | S100A4   | blue |

|              |          |      |
|--------------|----------|------|
| ILMN_1739792 | RHOG     | blue |
| ILMN_1729650 | PEX7     | blue |
| ILMN_2174805 | CD300LG  | blue |
| ILMN_1789642 | DNAJC5   | blue |
| ILMN_1717519 | JPH2     | blue |
| ILMN_2345142 | SULF2    | blue |
| ILMN_1770127 | DNAJA2   | blue |
| ILMN_1739987 | KCNH2    | blue |
| ILMN_1778684 | BRE      | blue |
| ILMN_1766054 | ABCA1    | blue |
| ILMN_1714990 | DBT      | blue |
| ILMN_1722834 | RGS12    | blue |
| ILMN_1744604 | CYBA     | blue |
| ILMN_1659339 | ELP4     | blue |
| ILMN_1693650 | FES      | blue |
| ILMN_2124769 | YBX1     | blue |
| ILMN_1742109 | DNAJC19  | blue |
| ILMN_1664216 | NKIRAS1  | blue |
| ILMN_1691731 | PARP14   | blue |
| ILMN_1808011 | FAM46B   | blue |
| ILMN_1680579 | ATP2B4   | blue |
| ILMN_1737847 | RMND5B   | blue |
| ILMN_1705302 | FCGRT    | blue |
| ILMN_2355462 | CYFIP1   | blue |
| ILMN_1893511 | TRIM52   | blue |
| ILMN_1738749 | MAST3    | blue |
| ILMN_2066066 | HLA-DRB6 | blue |
| ILMN_1755711 | CTC1     | blue |
| ILMN_1714602 | CD86     | blue |
| ILMN_2085862 | SLC15A3  | blue |
| ILMN_2405628 | TOP1MT   | blue |
| ILMN_1666269 | CTSZ     | blue |
| ILMN_1804316 | TCAP     | blue |
| ILMN_1720158 | ETS2     | blue |
| ILMN_1742238 | SET      | blue |
| ILMN_1716608 | NGF      | blue |
| ILMN_1723020 | MAP3K1   | blue |
| ILMN_1801105 | PRKCD    | blue |
| ILMN_1711383 | STK4     | blue |
| ILMN_1705617 | CFL1     | blue |
| ILMN_1655137 | ZCCHC11  | blue |
| ILMN_1658660 | ACTC1    | blue |
| ILMN_2390416 | BAG6     | blue |
| ILMN_1760493 | LIMS2    | blue |
| ILMN_1783226 | SSR2     | blue |

|              |          |      |
|--------------|----------|------|
| ILMN_1669376 | DRAM1    | blue |
| ILMN_1785071 | SEPP1    | blue |
| ILMN_1700168 | LARS2    | blue |
| ILMN_1740265 | ACOT7    | blue |
| ILMN_1751020 | PACSIN1  | blue |
| ILMN_1751143 | C7orf23  | blue |
| ILMN_2385239 | PBRM1    | blue |
| ILMN_2049536 | TRPV2    | blue |
| ILMN_2345837 | CLTA     | blue |
| ILMN_1737833 | ATN1     | blue |
| ILMN_2184966 | ZHX2     | blue |
| ILMN_1796738 | SPAST    | blue |
| ILMN_2377240 | AKTIP    | blue |
| ILMN_1745963 | FOLR2    | blue |
| ILMN_1807171 | PLA2G5   | blue |
| ILMN_1711909 | EDEM2    | blue |
| ILMN_1879480 | CCNG2    | blue |
| ILMN_1651819 | GALNT11  | blue |
| ILMN_1806403 | RASL12   | blue |
| ILMN_1795839 | SCCPDH   | blue |
| ILMN_1790537 | RMI2     | blue |
| ILMN_2358277 | RSRC2    | blue |
| ILMN_1813685 | RAB7L1   | blue |
| ILMN_1738523 | MYD88    | blue |
| ILMN_1676449 | SLIT2    | blue |
| ILMN_1657868 | SIRT4    | blue |
| ILMN_2359907 | CD68     | blue |
| ILMN_1707763 | ST7      | blue |
| ILMN_1715718 | ZNF784   | blue |
| ILMN_2152711 | ACVR2A   | blue |
| ILMN_1706149 | PDCD2L   | blue |
| ILMN_1764522 | LMBR1    | blue |
| ILMN_1779735 | C7orf59  | blue |
| ILMN_2339294 | LILRB5   | blue |
| ILMN_2152131 | ACTB     | blue |
| ILMN_1807493 | ACVRL1   | blue |
| ILMN_1667476 | LTBR     | blue |
| ILMN_1797005 | PGLS     | blue |
| ILMN_1804263 | ZNF76    | blue |
| ILMN_1701877 | AXL      | blue |
| ILMN_1736863 | TMEM140  | blue |
| ILMN_1764861 | ISOC1    | blue |
| ILMN_1696046 | SIVA1    | blue |
| ILMN_1664303 | HTATIP2  | blue |
| ILMN_1685005 | TNFRSF1A | blue |

|              |          |      |
|--------------|----------|------|
| ILMN_1711810 | PNKD     | blue |
| ILMN_1730575 | GCLC     | blue |
| ILMN_1890614 | FAM212B  | blue |
| ILMN_1694057 | EIF3K    | blue |
| ILMN_1784300 | TUBA4A   | blue |
| ILMN_1651950 | TPST1    | blue |
| ILMN_1745737 | DIS3L2   | blue |
| ILMN_1698677 | C4orf27  | blue |
| ILMN_1792518 | STX7     | blue |
| ILMN_2193591 | UNC93B1  | blue |
| ILMN_1795762 | PLEK     | blue |
| ILMN_1771003 | HAUS4    | blue |
| ILMN_1718863 | KCNK1    | blue |
| ILMN_1738718 | CYB561D2 | blue |
| ILMN_1752810 | LARP6    | blue |
| ILMN_1743583 | MADD     | blue |
| ILMN_1810275 | SLC7A7   | blue |
| ILMN_1666049 | NUP214   | blue |
| ILMN_1808114 | LYVE1    | blue |
| ILMN_2204664 | NBPF14   | blue |
| ILMN_1712684 | FAM20C   | blue |
| ILMN_1754921 | FAM43B   | blue |
| ILMN_1762549 | ORAOV1   | blue |
| ILMN_1663605 | RNF123   | blue |
| ILMN_1746579 | UBE2O    | blue |
| ILMN_1711048 | ZBTB17   | blue |
| ILMN_1814998 | POTEKP   | blue |
| ILMN_1695404 | LY6E     | blue |
| ILMN_1655611 | TSHZ2    | blue |
| ILMN_1838313 | LRRRC8B  | blue |
| ILMN_1737663 | C7orf13  | blue |
| ILMN_1758418 | TNFSF13B | blue |
| ILMN_1684205 | CIB1     | blue |
| ILMN_1723480 | BST2     | blue |
| ILMN_1761733 | HLA-DMB  | blue |
| ILMN_1665797 | CSE1L    | blue |
| ILMN_1805796 | FLYWCH2  | blue |
| ILMN_1652735 | RFXAP    | blue |
| ILMN_2380938 | SYT7     | blue |
| ILMN_2165354 | DCLK1    | blue |
| ILMN_1713759 | UBE2J1   | blue |
| ILMN_1779800 | MARK1    | blue |
| ILMN_1654851 | FAM134A  | blue |
| ILMN_2316918 | PANK1    | blue |
| ILMN_1728810 | NDUFS1   | blue |

|              |           |      |
|--------------|-----------|------|
| ILMN_1768940 | COL15A1   | blue |
| ILMN_1756590 | SYS1      | blue |
| ILMN_1659189 | C9orf89   | blue |
| ILMN_1700923 | ATG4C     | blue |
| ILMN_1759326 | P2RX7     | blue |
| ILMN_1687403 | MRPL40    | blue |
| ILMN_1784218 | DDX23     | blue |
| ILMN_1701940 | FAM73B    | blue |
| ILMN_1772692 | DICER1    | blue |
| ILMN_1774066 | TMEM141   | blue |
| ILMN_1656487 | FGA       | blue |
| ILMN_1709674 | GFPT2     | blue |
| ILMN_1709474 | ALMS1     | blue |
| ILMN_1762861 | HLA-F     | blue |
| ILMN_1693826 | HAVCR2    | blue |
| ILMN_1770742 | TMEM55B   | blue |
| ILMN_1660787 | SUCLA2    | blue |
| ILMN_1684357 | LINC00341 | blue |
| ILMN_1768480 | VGLL4     | blue |
| ILMN_1744138 | CHCHD7    | blue |
| ILMN_2394193 | METTL21D  | blue |
| ILMN_2072178 | ECHDC3    | blue |
| ILMN_1732216 | NARS      | blue |
| ILMN_1790978 | ATG7      | blue |
| ILMN_1757072 | FKBP1C    | blue |
| ILMN_1718520 | RNLS      | blue |
| ILMN_2121068 | ADAM17    | blue |
| ILMN_1813625 | TRIM25    | blue |
| ILMN_1677122 | FAM168B   | blue |
| ILMN_1797342 | FNBP1     | blue |
| ILMN_1811574 | MAPK8IP3  | blue |
| ILMN_1772686 | FGD3      | blue |
| ILMN_1720267 | TARSL2    | blue |
| ILMN_2390310 | MIR22HG   | blue |
| ILMN_1651433 | DCK       | blue |
| ILMN_2216918 | SHPK      | blue |
| ILMN_1791873 | COG1      | blue |
| ILMN_1803647 | FAM162A   | blue |
| ILMN_1669508 | PAF1      | blue |
| ILMN_1792587 | VPS4B     | blue |
| ILMN_1768962 | AKAP8L    | blue |
| ILMN_1769383 | GIMAP5    | blue |
| ILMN_1718063 | LIPA      | blue |
| ILMN_1750805 | ARHGAP30  | blue |
| ILMN_2165867 | DHCR7     | blue |

|              |          |      |
|--------------|----------|------|
| ILMN_1662419 | COX7A1   | blue |
| ILMN_2278729 | EIF3B    | blue |
| ILMN_1676611 | PHPT1    | blue |
| ILMN_1719986 | PIK3IP1  | blue |
| ILMN_1662438 | SOD1     | blue |
| ILMN_1779530 | COG6     | blue |
| ILMN_2201347 | ZDHHC3   | blue |
| ILMN_1726666 | GPX3     | blue |
| ILMN_1792959 | KCNMB2   | blue |
| ILMN_1726245 | TGFBR2   | blue |
| ILMN_1664855 | PPP1R14C | blue |
| ILMN_2231928 | MX2      | blue |
| ILMN_2081682 | SMAP2    | blue |
| ILMN_2212763 | ICAM3    | blue |
| ILMN_1793959 | ADPGK    | blue |
| ILMN_1724052 | ZNF814   | blue |
| ILMN_2119535 | RIPK1    | blue |
| ILMN_1700549 | ERLIN2   | blue |
| ILMN_2166972 | BBS12    | blue |
| ILMN_1722276 | PAFAH1B1 | blue |
| ILMN_1786426 | IGFLR1   | blue |
| ILMN_1713301 | DGCR2    | blue |
| ILMN_1695731 | TUBG1    | blue |
| ILMN_2116714 | SLC39A1  | blue |
| ILMN_1736093 | SNX33    | blue |
| ILMN_1696375 | TTC31    | blue |
| ILMN_1798654 | MCM6     | blue |
| ILMN_1738699 | FXR2     | blue |
| ILMN_1725121 | XPO1     | blue |
| ILMN_2329679 | TPST2    | blue |
| ILMN_1690546 | PPP3CC   | blue |
| ILMN_1773389 | PLTP     | blue |
| ILMN_1751656 | KLF11    | blue |
| ILMN_1743643 | ZXDC     | blue |
| ILMN_1804277 | SPRED1   | blue |
| ILMN_2388547 | EPST11   | blue |
| ILMN_1731224 | PARP9    | blue |
| ILMN_1740161 | ANKRD26  | blue |
| ILMN_1729749 | HERC5    | blue |
| ILMN_1673788 | CDV3     | blue |
| ILMN_1682930 | SIPA1    | blue |
| ILMN_2389501 | HSD11B1  | blue |
| ILMN_2362902 | RASSF5   | blue |
| ILMN_1814823 | FTL      | blue |
| ILMN_1743767 | ZNF446   | blue |

|              |           |      |
|--------------|-----------|------|
| ILMN_1761155 | PABPC1    | blue |
| ILMN_1785284 | ALDH6A1   | blue |
| ILMN_1722502 | CCT6A     | blue |
| ILMN_1803429 | CD44      | blue |
| ILMN_1804884 | C22orf39  | blue |
| ILMN_1787345 | FKBP11    | blue |
| ILMN_1664012 | CANT1     | blue |
| ILMN_1711368 | TRAPPC9   | blue |
| ILMN_1667578 | DUSP26    | blue |
| ILMN_1672504 | PDXK      | blue |
| ILMN_1722855 | VEGFB     | blue |
| ILMN_1763091 | C14orf43  | blue |
| ILMN_1785113 | MUT       | blue |
| ILMN_1654268 | HMGB2     | blue |
| ILMN_1761912 | MGAT1     | blue |
| ILMN_1769319 | CNBP      | blue |
| ILMN_1796409 | C1QB      | blue |
| ILMN_1730347 | CCDC115   | blue |
| ILMN_2190084 | VAMP8     | blue |
| ILMN_1807719 | CTNS      | blue |
| ILMN_2309180 | SMARCD3   | blue |
| ILMN_1801864 | NTAN1     | blue |
| ILMN_1779252 | TRIM22    | blue |
| ILMN_2376416 | UBXN11    | blue |
| ILMN_1808769 | LINC00467 | blue |
| ILMN_1703074 | CPD       | blue |
| ILMN_1810431 | C1orf186  | blue |
| ILMN_1655987 | STAB1     | blue |
| ILMN_1813344 | NDUFAF5   | blue |
| ILMN_2176955 | CUL5      | blue |
| ILMN_1664292 | ZNF415    | blue |
| ILMN_2366330 | FERMT3    | blue |
| ILMN_1679324 | EIF1B     | blue |
| ILMN_1739770 | MED7      | blue |
| ILMN_1807042 | MARCKS    | blue |
| ILMN_2391522 | MRPL47    | blue |
| ILMN_1749011 | NECAP2    | blue |
| ILMN_1678605 | CDC123    | blue |
| ILMN_1653712 | UAP1L1    | blue |
| ILMN_1704730 | CD93      | blue |
| ILMN_1813489 | RAF1      | blue |
| ILMN_2203588 | MYL5      | blue |
| ILMN_1727073 | MEA1      | blue |
| ILMN_1815500 | ITPR3     | blue |
| ILMN_1806801 | TMEM182   | blue |

|              |          |      |
|--------------|----------|------|
| ILMN_1768197 | PTBP3    | blue |
| ILMN_1796245 | DNASE2   | blue |
| ILMN_1657039 | FILIP1   | blue |
| ILMN_1671554 | LPIN1    | blue |
| ILMN_1695851 | PARVG    | blue |
| ILMN_1721713 | EXOSC9   | blue |
| ILMN_1655077 | PRDM1    | blue |
| ILMN_2179652 | PRELID1  | blue |
| ILMN_1677607 | SC5DL    | blue |
| ILMN_2193175 | TIMMDC1  | blue |
| ILMN_1708375 | IRF1     | blue |
| ILMN_1741176 | CHMP2B   | blue |
| ILMN_1791771 | HCK      | blue |
| ILMN_1813120 | MAP4K3   | blue |
| ILMN_2086064 | SNRPC    | blue |
| ILMN_1790859 | PLAC9    | blue |
| ILMN_1788874 | SERPINA3 | blue |
| ILMN_1737163 | SH3BGRL3 | blue |
| ILMN_1728478 | CXCL16   | blue |
| ILMN_1712269 | ZNF605   | blue |
| ILMN_1785660 | SRPR     | blue |
| ILMN_1664761 | TMEM138  | blue |
| ILMN_1692760 | DPAGT1   | blue |
| ILMN_1659913 | ISG20    | blue |
| ILMN_2148944 | ADCY4    | blue |
| ILMN_1710514 | BCL3     | blue |
| ILMN_1662932 | LCP1     | blue |
| ILMN_1789457 | GNL1     | blue |
| ILMN_1664449 | ALG5     | blue |
| ILMN_2396444 | CD14     | blue |
| ILMN_1661409 | FAM208A  | blue |
| ILMN_2301624 | MACF1    | blue |
| ILMN_1710756 | ENO1     | blue |
| ILMN_1742456 | OSTF1    | blue |
| ILMN_1764398 | TUBE1    | blue |
| ILMN_1789074 | HSPA1A   | blue |
| ILMN_1798181 | IRF7     | blue |
| ILMN_1675266 | NAGPA    | blue |
| ILMN_1675150 | HKR1     | blue |
| ILMN_1815519 | EPN2     | blue |
| ILMN_1746968 | PHF1     | blue |
| ILMN_1728914 | PRUNE    | blue |
| ILMN_1751898 | C12orf4  | blue |
| ILMN_1672662 | SLC20A1  | blue |
| ILMN_1673941 | RBM24    | blue |

|              |          |      |
|--------------|----------|------|
| ILMN_1750429 | MKNK1    | blue |
| ILMN_1808860 | STX5     | blue |
| ILMN_2169801 | TPSAB1   | blue |
| ILMN_1734231 | DDOST    | blue |
| ILMN_1791569 | PLXNA1   | blue |
| ILMN_1671703 | ACTA2    | blue |
| ILMN_1742788 | PKD1L2   | blue |
| ILMN_1691131 | LSMD1    | blue |
| ILMN_2157544 | GBF1     | blue |
| ILMN_1799642 | TRIM24   | blue |
| ILMN_1660364 | CYTH4    | blue |
| ILMN_1766171 | SNF8     | blue |
| ILMN_2404629 | EFTUD1   | blue |
| ILMN_1659029 | FAM116B  | blue |
| ILMN_1772124 | ATRN     | blue |
| ILMN_1759330 | KIF1A    | blue |
| ILMN_1803819 | IQGAP1   | blue |
| ILMN_1697409 | TNFRSF14 | blue |
| ILMN_1688452 | LCMT1    | blue |
| ILMN_1772302 | MTHFS    | blue |
| ILMN_1678054 | TRIM21   | blue |
| ILMN_1758938 | SLC31A2  | blue |
| ILMN_1748707 | CRELD2   | blue |
| ILMN_1750401 | C17orf62 | blue |
| ILMN_1685625 | UCP2     | blue |
| ILMN_1660544 | ARRDC4   | blue |
| ILMN_2394381 | CLN3     | blue |
| ILMN_1722662 | RAD23B   | blue |
| ILMN_1783806 | DTNBP1   | blue |
| ILMN_2197846 | HADHB    | blue |
| ILMN_1663080 | LFNG     | blue |
| ILMN_1673026 | CHCHD3   | blue |
| ILMN_2125880 | ZNF566   | blue |
| ILMN_1805750 | IFITM3   | blue |
| ILMN_1696643 | TLN1     | blue |
| ILMN_1724754 | MPP3     | blue |
| ILMN_1794505 | SHFM1    | blue |
| ILMN_1700604 | RBM14    | blue |
| ILMN_2141118 | C15orf59 | blue |
| ILMN_2368318 | FGR      | blue |
| ILMN_1775036 | SEC22A   | blue |
| ILMN_2313926 | CDC42SE2 | blue |
| ILMN_1682658 | EPM2AIP1 | blue |
| ILMN_1808765 | ZNF25    | blue |
| ILMN_1711227 | GMDS     | blue |

|              |          |      |
|--------------|----------|------|
| ILMN_1666632 | VPS52    | blue |
| ILMN_2327346 | SSBP4    | blue |
| ILMN_2116366 | RPL12    | blue |
| ILMN_1736597 | TKT      | blue |
| ILMN_1660275 | C2orf43  | blue |
| ILMN_1698766 | PYCARD   | blue |
| ILMN_1694177 | PCNA     | blue |
| ILMN_1727087 | GJA1     | blue |
| ILMN_2129505 | CYBASC3  | blue |
| ILMN_1730084 | COMT     | blue |
| ILMN_1856861 | INO80D   | blue |
| ILMN_1662129 | RCN2     | blue |
| ILMN_2212354 | WDR46    | blue |
| ILMN_1773427 | KANK1    | blue |
| ILMN_1773018 | CUEDC2   | blue |
| ILMN_1723436 | PFKFB2   | blue |
| ILMN_1657547 | CCDC34   | blue |
| ILMN_1705247 | ACSL5    | blue |
| ILMN_1704985 | CYP27A1  | blue |
| ILMN_1786976 | RAB22A   | blue |
| ILMN_1763452 | EVI2B    | blue |
| ILMN_1652357 | PDHX     | blue |
| ILMN_1754894 | C1orf162 | blue |
| ILMN_1657810 | PPM1M    | blue |
| ILMN_1760858 | RAB8A    | blue |
| ILMN_1708059 | USP13    | blue |
| ILMN_1700950 | OSTCP2   | blue |
| ILMN_1657129 | SKAP2    | blue |
| ILMN_1707232 | EBF3     | blue |
| ILMN_2091792 | ENTPD6   | blue |
| ILMN_1774091 | FECH     | blue |
| ILMN_1705111 | FNDC3A   | blue |
| ILMN_1693862 | C8orf82  | blue |
| ILMN_1670099 | NOSTRIN  | blue |
| ILMN_2390299 | PSMB8    | blue |
| ILMN_2115005 | FGD2     | blue |
| ILMN_1813775 | GAK      | blue |
| ILMN_1701204 | VEGFC    | blue |
| ILMN_1782444 | YIPF4    | blue |
| ILMN_1781155 | LYN      | blue |
| ILMN_1674063 | OAS2     | blue |
| ILMN_1658356 | PAMR1    | blue |
| ILMN_1788213 | FRAT2    | blue |
| ILMN_1721046 | PTMS     | blue |
| ILMN_1751079 | TAP1     | blue |

|              |           |       |
|--------------|-----------|-------|
| ILMN_1680313 | STX4      | blue  |
| ILMN_1655561 | ARPC3     | blue  |
| ILMN_2189993 | MRPS35    | blue  |
| ILMN_1727043 | GLT25D1   | blue  |
| ILMN_1811997 | RNF115    | blue  |
| ILMN_1815086 | NINJ1     | blue  |
| ILMN_1716803 | RALYL     | blue  |
| ILMN_1781626 | C1S       | blue  |
| ILMN_1769282 | FRMD6     | blue  |
| ILMN_1665865 | IGFBP4    | blue  |
| ILMN_1666775 | CACNA1C   | blue  |
| ILMN_1793476 | PRKCDBP   | blue  |
| ILMN_1784031 | TIMM44    | blue  |
| ILMN_1732967 | PPP1R18   | blue  |
| ILMN_1724437 | GCAT      | blue  |
| ILMN_1709750 | SUSD1     | blue  |
| ILMN_1808712 | RNF40     | blue  |
| ILMN_1732296 | ID3       | blue  |
| ILMN_1771135 | ZKSCAN2   | blue  |
| ILMN_1726289 | C12orf35  | blue  |
| ILMN_1702407 | SPIN1     | blue  |
| ILMN_1745329 | PRR14     | blue  |
| ILMN_1759154 | PABPN1    | blue  |
| ILMN_1812392 | TMSB10    | blue  |
| ILMN_1812940 | TRMT1     | blue  |
| ILMN_1663866 | TGFBI     | blue  |
| ILMN_1722774 | VPS72     | blue  |
| ILMN_1681845 | PAPD4     | brown |
| ILMN_1715616 | LRR1      | brown |
| ILMN_1747271 | ATP1B2    | brown |
| ILMN_2202481 | UBLCP1    | brown |
| ILMN_1687035 | ADAMTSL4  | brown |
| ILMN_1683447 | RPL35P1   | brown |
| ILMN_1740165 | C14orf102 | brown |
| ILMN_1690566 | RASSF4    | brown |
| ILMN_1691432 | PRDM4     | brown |
| ILMN_1800750 | ZNF692    | brown |
| ILMN_1801605 | BIRC6     | brown |
| ILMN_2385220 | DFFA      | brown |
| ILMN_1775304 | DNAJB1    | brown |
| ILMN_1811877 | ANTXR1    | brown |
| ILMN_1729130 | TMEM248   | brown |
| ILMN_1653718 | ZFAND2B   | brown |
| ILMN_1655913 | NUCB2     | brown |
| ILMN_1751452 | NDFIP1    | brown |

|              |          |       |
|--------------|----------|-------|
| ILMN_1683939 | VIPR2    | brown |
| ILMN_1755303 | ZNF217   | brown |
| ILMN_1671742 | UPF3A    | brown |
| ILMN_2052891 | PKD2     | brown |
| ILMN_1804327 | NAP1L4   | brown |
| ILMN_2145396 | AKR7A3   | brown |
| ILMN_1749629 | CUL1     | brown |
| ILMN_1674421 | TM9SF4   | brown |
| ILMN_1662719 | GPBP1L1  | brown |
| ILMN_1670532 | GMCL1    | brown |
| ILMN_1792671 | C12orf29 | brown |
| ILMN_1762003 | SEC62    | brown |
| ILMN_1709399 | SLC25A34 | brown |
| ILMN_1705114 | NUMB     | brown |
| ILMN_1703573 | DNAJC17  | brown |
| ILMN_1802631 | AGA      | brown |
| ILMN_1756525 | KLHL20   | brown |
| ILMN_2334303 | SEC24B   | brown |
| ILMN_1656902 | HECTD3   | brown |
| ILMN_1849941 | MAPK8    | brown |
| ILMN_1668540 | ZNHIT6   | brown |
| ILMN_1785252 | SLC26A6  | brown |
| ILMN_1803941 | TBC1D15  | brown |
| ILMN_1812967 | CNPY3    | brown |
| ILMN_1665384 | SH3BP5L  | brown |
| ILMN_1886847 | ODF2L    | brown |
| ILMN_1768640 | CRNKL1   | brown |
| ILMN_2390472 | TTC14    | brown |
| ILMN_2186369 | NCOR1    | brown |
| ILMN_2116661 | PRPSAP2  | brown |
| ILMN_1691293 | RNF185   | brown |
| ILMN_2222768 | REPS1    | brown |
| ILMN_1668924 | BEGAIN   | brown |
| ILMN_1727761 | GMEB1    | brown |
| ILMN_2082324 | SLC36A4  | brown |
| ILMN_1811195 | ZNF211   | brown |
| ILMN_1778836 | SRSF7    | brown |
| ILMN_1794470 | ANKFY1   | brown |
| ILMN_1714216 | TSC2     | brown |
| ILMN_1751171 | IRF2BP1  | brown |
| ILMN_1739641 | MTMR3    | brown |
| ILMN_1776088 | NAT9     | brown |
| ILMN_2134538 | FTH1P11  | brown |
| ILMN_1767892 | DUSP12   | brown |
| ILMN_1715607 | CHMP4A   | brown |

|              |          |       |
|--------------|----------|-------|
| ILMN_1741957 | RABEPK   | brown |
| ILMN_1789095 | BMPR2    | brown |
| ILMN_2141790 | HYOU1    | brown |
| ILMN_2090802 | TMEM79   | brown |
| ILMN_1709042 | RBM4     | brown |
| ILMN_1701487 | TAOK2    | brown |
| ILMN_1732577 | TMEM216  | brown |
| ILMN_1667356 | PPP1R21  | brown |
| ILMN_1651343 | ITGA11   | brown |
| ILMN_2175112 | KCNS3    | brown |
| ILMN_2046003 | ZDHHC6   | brown |
| ILMN_1755234 | SSH3     | brown |
| ILMN_1766125 | LONP1    | brown |
| ILMN_2101920 | HNRNPH1  | brown |
| ILMN_2365484 | SNX1     | brown |
| ILMN_1708619 | SEH1L    | brown |
| ILMN_1677487 | ANKZF1   | brown |
| ILMN_1790352 | PIGZ     | brown |
| ILMN_1686555 | FYN      | brown |
| ILMN_1770892 | YY1      | brown |
| ILMN_1722390 | CHRAC1   | brown |
| ILMN_2323526 | WAC      | brown |
| ILMN_1652749 | ERF      | brown |
| ILMN_2103841 | AIP      | brown |
| ILMN_1807649 | SPOPL    | brown |
| ILMN_1658519 | SLC13A3  | brown |
| ILMN_1700380 | ATP6V0A2 | brown |
| ILMN_2200917 | SLC4A7   | brown |
| ILMN_2222880 | SLC25A42 | brown |
| ILMN_1681324 | MRPL49   | brown |
| ILMN_1703558 | FHL3     | brown |
| ILMN_1728498 | PCBP4    | brown |
| ILMN_1656574 | PCGF6    | brown |
| ILMN_1781290 | RHOA     | brown |
| ILMN_1721833 | IER5     | brown |
| ILMN_1792681 | CCDC86   | brown |
| ILMN_1684663 | ZDHHC13  | brown |
| ILMN_1723536 | USP33    | brown |
| ILMN_2104696 | ERICH1   | brown |
| ILMN_1775235 | AFF3     | brown |
| ILMN_1790953 | TBCB     | brown |
| ILMN_1745954 | CORO1C   | brown |
| ILMN_2216157 | GNA12    | brown |
| ILMN_2214678 | MXD1     | brown |
| ILMN_1740171 | DUSP11   | brown |

|              |          |       |
|--------------|----------|-------|
| ILMN_1724495 | SESTD1   | brown |
| ILMN_1802615 | CDK6     | brown |
| ILMN_1701711 | BRD8     | brown |
| ILMN_1742166 | GRWD1    | brown |
| ILMN_1673069 | DPP9     | brown |
| ILMN_1769135 | DPP7     | brown |
| ILMN_2332795 | ZNF16    | brown |
| ILMN_1720233 | CWC25    | brown |
| ILMN_1699472 | ST3GAL3  | brown |
| ILMN_1739156 | DOPEY1   | brown |
| ILMN_1737535 | TAF4     | brown |
| ILMN_1724493 | LYSMD2   | brown |
| ILMN_1708016 | FAM210B  | brown |
| ILMN_2093748 | ZNF669   | brown |
| ILMN_2180371 | FAM216A  | brown |
| ILMN_1738750 | TFCP2    | brown |
| ILMN_1728710 | ZNF816   | brown |
| ILMN_1786718 | NDUFV1   | brown |
| ILMN_1812688 | C2orf18  | brown |
| ILMN_1761911 | GORAB    | brown |
| ILMN_1733875 | RUNDC1   | brown |
| ILMN_1721842 | RYBP     | brown |
| ILMN_2374036 | CTSL1    | brown |
| ILMN_1729051 | MSH6     | brown |
| ILMN_1684271 | ACBD6    | brown |
| ILMN_1694671 | ZFAND2A  | brown |
| ILMN_2342240 | MGAT2    | brown |
| ILMN_1724181 | IL15     | brown |
| ILMN_1738237 | HS1BP3   | brown |
| ILMN_2215211 | ZNF514   | brown |
| ILMN_1690963 | ASAP1    | brown |
| ILMN_1787415 | SNX16    | brown |
| ILMN_1723007 | ZCCHC9   | brown |
| ILMN_1769671 | RYK      | brown |
| ILMN_1789410 | ZSCAN21  | brown |
| ILMN_1788783 | TRAM2    | brown |
| ILMN_1706859 | C22orf32 | brown |
| ILMN_1792456 | CCDC104  | brown |
| ILMN_1721575 | VPS18    | brown |
| ILMN_1668469 | KIAA0922 | brown |
| ILMN_2078389 | SLC4A2   | brown |
| ILMN_1777397 | MSX1     | brown |
| ILMN_1666178 | TP53I13  | brown |
| ILMN_1746686 | POLR1C   | brown |
| ILMN_2411731 | HPS5     | brown |

|              |          |       |
|--------------|----------|-------|
| ILMN_1805449 | TAPBPL   | brown |
| ILMN_1718069 | MIS12    | brown |
| ILMN_1798975 | EGFR     | brown |
| ILMN_1705849 | SPR      | brown |
| ILMN_1782257 | METTL17  | brown |
| ILMN_2225577 | POC5     | brown |
| ILMN_2137464 | DVL3     | brown |
| ILMN_1656297 | YBEY     | brown |
| ILMN_1660810 | TTC17    | brown |
| ILMN_2330267 | ABCE1    | brown |
| ILMN_1683700 | TNFSF12  | brown |
| ILMN_1663090 | SON      | brown |
| ILMN_1803312 | DIMT1    | brown |
| ILMN_2150654 | ZSWIM4   | brown |
| ILMN_1677452 | REXO4    | brown |
| ILMN_1719204 | PRPF31   | brown |
| ILMN_1812552 | ACER3    | brown |
| ILMN_1809139 | AHCTF1   | brown |
| ILMN_1685077 | SNX7     | brown |
| ILMN_1677877 | UBE2L3   | brown |
| ILMN_1801223 | WTIP     | brown |
| ILMN_1741782 | SS18     | brown |
| ILMN_2192620 | DCAF15   | brown |
| ILMN_1787511 | THUMPD2  | brown |
| ILMN_1814305 | SAMD9    | brown |
| ILMN_1689445 | POLR2H   | brown |
| ILMN_1713966 | MRPL52   | brown |
| ILMN_1741475 | PPP1R35  | brown |
| ILMN_1777765 | C12orf10 | brown |
| ILMN_1810176 | MAP3K7   | brown |
| ILMN_1785336 | PMM2     | brown |
| ILMN_1727142 | IKBKB    | brown |
| ILMN_1793522 | PRKAB1   | brown |
| ILMN_2391551 | PROSER1  | brown |
| ILMN_2396648 | EXOSC1   | brown |
| ILMN_1694759 | C19orf42 | brown |
| ILMN_1748077 | DDX59    | brown |
| ILMN_1770031 | ABHD10   | brown |
| ILMN_1727574 | ZNF827   | brown |
| ILMN_1708110 | TMEM144  | brown |
| ILMN_1811957 | CAMSAP1  | brown |
| ILMN_1741253 | UBR5     | brown |
| ILMN_1699676 | SPTSSA   | brown |
| ILMN_1671891 | PID1     | brown |
| ILMN_2048700 | ATAD2    | brown |

|              |          |       |
|--------------|----------|-------|
| ILMN_1753819 | RFFL     | brown |
| ILMN_1692511 | TMEM106C | brown |
| ILMN_1685567 | TGDS     | brown |
| ILMN_1808634 | DRAM2    | brown |
| ILMN_1793934 | PISD     | brown |
| ILMN_1697736 | EXOSC2   | brown |
| ILMN_2166384 | IPO5     | brown |
| ILMN_1800975 | PSME3    | brown |
| ILMN_1808938 | PIGF     | brown |
| ILMN_1809285 | DCP1A    | brown |
| ILMN_1673962 | NUP205   | brown |
| ILMN_1666208 | MIS18BP1 | brown |
| ILMN_1719097 | C18orf8  | brown |
| ILMN_1790008 | CYP2U1   | brown |
| ILMN_1802905 | PIAS4    | brown |
| ILMN_1666827 | TRAPPC11 | brown |
| ILMN_1799688 | CDC23    | brown |
| ILMN_1749081 | AUTS2    | brown |
| ILMN_2075643 | ANKRD29  | brown |
| ILMN_1808047 | PHC2     | brown |
| ILMN_1665357 | EPS15    | brown |
| ILMN_2073289 | MTSS1    | brown |
| ILMN_1718972 | MFSD3    | brown |
| ILMN_1723969 | PLCB1    | brown |
| ILMN_1758250 | TRAFD1   | brown |
| ILMN_1672135 | ZNF615   | brown |
| ILMN_1671221 | GAPVD1   | brown |
| ILMN_1772946 | STRN3    | brown |
| ILMN_1739199 | WASH3P   | brown |
| ILMN_1668498 | CWF19L2  | brown |
| ILMN_1794726 | RNF167   | brown |
| ILMN_1753279 | HNRNPA0  | brown |
| ILMN_1775753 | FBXW2    | brown |
| ILMN_1717799 | PRKCE    | brown |
| ILMN_1794956 | BBS9     | brown |
| ILMN_1706015 | FAM43A   | brown |
| ILMN_1655429 | TNFAIP1  | brown |
| ILMN_1671326 | EIF2C1   | brown |
| ILMN_1657139 | ADAT1    | brown |
| ILMN_1747078 | HYLS1    | brown |
| ILMN_1762972 | CHD9     | brown |
| ILMN_1724753 | NIN      | brown |
| ILMN_1767934 | PCSK5    | brown |
| ILMN_2191720 | ZNF471   | brown |
| ILMN_1713178 | FAM116A  | brown |

|              |          |       |
|--------------|----------|-------|
| ILMN_1697433 | CYP46A1  | brown |
| ILMN_1704024 | TMEM160  | brown |
| ILMN_1773751 | HRAS     | brown |
| ILMN_1806752 | PLEKHH2  | brown |
| ILMN_1652929 | POGZ     | brown |
| ILMN_1651832 | EHD1     | brown |
| ILMN_1700896 | SAP30    | brown |
| ILMN_2395728 | HNRNPUL1 | brown |
| ILMN_1720442 | NCBP2    | brown |
| ILMN_2399622 | AP1G1    | brown |
| ILMN_1659463 | APAF1    | brown |
| ILMN_1686679 | ZNF462   | brown |
| ILMN_1772706 | C10orf32 | brown |
| ILMN_1747460 | TMEM184B | brown |
| ILMN_1681008 | CGRRF1   | brown |
| ILMN_1711166 | WRAP73   | brown |
| ILMN_1699476 | RPE      | brown |
| ILMN_1675268 | LRP4     | brown |
| ILMN_2413278 | RPL13    | brown |
| ILMN_1746883 | SAT2     | brown |
| ILMN_1708095 | PANK2    | brown |
| ILMN_1809086 | XRN1     | brown |
| ILMN_1764577 | MFNG     | brown |
| ILMN_1683026 | PSMB10   | brown |
| ILMN_1669931 | TM9SF3   | brown |
| ILMN_2184789 | HSCB     | brown |
| ILMN_1733311 | PIGB     | brown |
| ILMN_2151368 | NOL12    | brown |
| ILMN_2411915 | ATG4B    | brown |
| ILMN_1721849 | ZNF660   | brown |
| ILMN_1804945 | ZNF667   | brown |
| ILMN_1676842 | BTAF1    | brown |
| ILMN_1762993 | PIGV     | brown |
| ILMN_1718013 | CPSF3L   | brown |
| ILMN_1683204 | GMEB2    | brown |
| ILMN_1771019 | MTMR4    | brown |
| ILMN_1706502 | EIF2AK2  | brown |
| ILMN_1689908 | ANKRD13A | brown |
| ILMN_1710598 | SKI      | brown |
| ILMN_1688565 | ZNF580   | brown |
| ILMN_1774427 | CALCOCO1 | brown |
| ILMN_1675674 | UBE4B    | brown |
| ILMN_1810228 | TTF2     | brown |
| ILMN_1754738 | AP1M1    | brown |
| ILMN_1715069 | TANK     | brown |

|              |          |       |
|--------------|----------|-------|
| ILMN_1657893 | TXNRD2   | brown |
| ILMN_2412294 | GNB5     | brown |
| ILMN_2044453 | LPAR5    | brown |
| ILMN_2317463 | INTS1    | brown |
| ILMN_1764851 | TP53RK   | brown |
| ILMN_1764177 | JARID2   | brown |
| ILMN_1760556 | C1orf63  | brown |
| ILMN_1718558 | PARP12   | brown |
| ILMN_2393144 | ARL6IP4  | brown |
| ILMN_2382354 | SENP7    | brown |
| ILMN_1714349 | GLCE     | brown |
| ILMN_2364357 | RPS6KB2  | brown |
| ILMN_2385688 | RABL2B   | brown |
| ILMN_1701655 | SLC24A6  | brown |
| ILMN_1790472 | SLC25A28 | brown |
| ILMN_1731358 | ZNF532   | brown |
| ILMN_1804938 | TPRA1    | brown |
| ILMN_1792256 | TBX2     | brown |
| ILMN_1755822 | SYDE1    | brown |
| ILMN_1693771 | ASPH     | brown |
| ILMN_1745415 | BBX      | brown |
| ILMN_1680925 | SLC9A3R1 | brown |
| ILMN_1728426 | INPPL1   | brown |
| ILMN_1769702 | GPAA1    | brown |
| ILMN_1667306 | RANBP10  | brown |
| ILMN_2321485 | PPP1R8   | brown |
| ILMN_1742798 | TRA2B    | brown |
| ILMN_1658373 | PAN2     | brown |
| ILMN_1730118 | ZNF644   | brown |
| ILMN_1706873 | RPL34    | brown |
| ILMN_2365595 | GMPR2    | brown |
| ILMN_2315694 | STRADA   | brown |
| ILMN_1771801 | SIRPG    | brown |
| ILMN_1751431 | WIBG     | brown |
| ILMN_1724040 | SOWAHC   | brown |
| ILMN_1666376 | TRIM56   | brown |
| ILMN_2070210 | RNF219   | brown |
| ILMN_1666453 | STK3     | brown |
| ILMN_1753190 | ERCC6L2  | brown |
| ILMN_1807152 | GOLGA1   | brown |
| ILMN_1702821 | TTLL7    | brown |
| ILMN_1720024 | IL11RA   | brown |
| ILMN_1776094 | PPCS     | brown |
| ILMN_1765019 | SACM1L   | brown |
| ILMN_1778032 | SURF6    | brown |

|              |           |       |
|--------------|-----------|-------|
| ILMN_1720623 | SYTL3     | brown |
| ILMN_1797950 | EXTL2     | brown |
| ILMN_2358069 | MAD1L1    | brown |
| ILMN_1700660 | RNF135    | brown |
| ILMN_1718900 | KCTD2     | brown |
| ILMN_2065783 | EXOC2     | brown |
| ILMN_2401769 | PHF14     | brown |
| ILMN_1757262 | ZBTB5     | brown |
| ILMN_2104877 | CMPK1     | brown |
| ILMN_1698668 | NR1D2     | brown |
| ILMN_1744508 | FAM53C    | brown |
| ILMN_1711886 | ALG3      | brown |
| ILMN_1741200 | RFX5      | brown |
| ILMN_1735275 | WDSUB1    | brown |
| ILMN_2326675 | NR2C1     | brown |
| ILMN_1652371 | KIAA1324L | brown |
| ILMN_1803143 | SYVN1     | brown |
| ILMN_1703650 | TNIP1     | brown |
| ILMN_1775008 | NCAPD2    | brown |
| ILMN_2090397 | ISG20L2   | brown |
| ILMN_1778238 | UTP6      | brown |
| ILMN_1770388 | VPS39     | brown |
| ILMN_1803676 | ENOSF1    | brown |
| ILMN_1748894 | GTPBP3    | brown |
| ILMN_1765880 | C16orf57  | brown |
| ILMN_1680644 | MIOS      | brown |
| ILMN_1792092 | ZCCHC8    | brown |
| ILMN_1787324 | C16orf48  | brown |
| ILMN_1726786 | TNRC6B    | brown |
| ILMN_1678998 | LRRRC14   | brown |
| ILMN_2119486 | DMTF1     | brown |
| ILMN_2257833 | BBS7      | brown |
| ILMN_2144573 | CTBS      | brown |
| ILMN_1753885 | YTHDF1    | brown |
| ILMN_1716384 | ATL2      | brown |
| ILMN_1778144 | SLC48A1   | brown |
| ILMN_2096970 | MYO3B     | brown |
| ILMN_2398489 | SIGMAR1   | brown |
| ILMN_1677785 | ZNF559    | brown |
| ILMN_1802096 | ABTB1     | brown |
| ILMN_1744968 | KCNAB1    | brown |
| ILMN_1685413 | ALG8      | brown |
| ILMN_1801553 | LEO1      | brown |
| ILMN_2103591 | MORC2     | brown |
| ILMN_1725594 | FAM188A   | brown |

|              |          |       |
|--------------|----------|-------|
| ILMN_2380839 | SNRNP70  | brown |
| ILMN_1699362 | IK       | brown |
| ILMN_2311989 | CUTA     | brown |
| ILMN_1815039 | RRP36    | brown |
| ILMN_1727458 | HDAC1    | brown |
| ILMN_2318638 | TGIF1    | brown |
| ILMN_1677534 | SCAP     | brown |
| ILMN_1671404 | SVIL     | brown |
| ILMN_1758831 | RNF31    | brown |
| ILMN_2226917 | KIAA0247 | brown |
| ILMN_1798886 | NUDT21   | brown |
| ILMN_1698406 | ORMDL1   | brown |
| ILMN_1781472 | CDC42BPA | brown |
| ILMN_2398847 | ARHGAP17 | brown |
| ILMN_1762766 | PTPRA    | brown |
| ILMN_2221076 | C17orf85 | brown |
| ILMN_2105923 | C12orf32 | brown |
| ILMN_1738263 | PIGU     | brown |
| ILMN_2113490 | NTN4     | brown |
| ILMN_1807106 | LDHA     | brown |
| ILMN_1679133 | SERPINB1 | brown |
| ILMN_1733421 | PRKCQ    | brown |
| ILMN_1757730 | TTC27    | brown |
| ILMN_1670931 | PDS5A    | brown |
| ILMN_2124082 | PPP2R5B  | brown |
| ILMN_1775692 | EIF4G3   | brown |
| ILMN_1680347 | ZNF317   | brown |
| ILMN_2142185 | CLEC14A  | brown |
| ILMN_1693711 | CCDC141  | brown |
| ILMN_1709479 | YAP1     | brown |
| ILMN_1801934 | SERTAD3  | brown |
| ILMN_1657288 | GUSBP4   | brown |
| ILMN_1659937 | ZBTB24   | brown |
| ILMN_1736042 | ME1      | brown |
| ILMN_2377185 | TCEB2    | brown |
| ILMN_1702124 | LNX2     | brown |
| ILMN_1703288 | C19orf6  | brown |
| ILMN_1752197 | PDDC1    | brown |
| ILMN_1793410 | SNTB1    | brown |
| ILMN_1730504 | AGPAT4   | brown |
| ILMN_1744068 | ELP3     | brown |
| ILMN_1798841 | PLCXD3   | brown |
| ILMN_1785177 | DNAJC14  | brown |
| ILMN_1680129 | NSUN2    | brown |
| ILMN_1694213 | PLEKHO1  | brown |

|              |         |       |
|--------------|---------|-------|
| ILMN_1708946 | VPS4A   | brown |
| ILMN_1774387 | ZHX3    | brown |
| ILMN_1770373 | TMEM39A | brown |
| ILMN_1685002 | RCE1    | brown |
| ILMN_1722522 | CCNT2   | brown |
| ILMN_1789240 | MLST8   | brown |
| ILMN_2383107 | VPS41   | brown |
| ILMN_1739454 | USP34   | brown |
| ILMN_1661439 | FLOT1   | brown |
| ILMN_1712929 | DNAJB12 | brown |
| ILMN_1728779 | NGLY1   | brown |
| ILMN_1756685 | DEPTOR  | brown |
| ILMN_1745217 | KANSL3  | brown |
| ILMN_1911605 | FRS2    | brown |
| ILMN_1771728 | PXMP4   | brown |
| ILMN_1754969 | LMCD1   | brown |
| ILMN_1718182 | THRA    | brown |
| ILMN_1789508 | GTF3C3  | brown |
| ILMN_1705907 | NUP153  | brown |
| ILMN_1675331 | PEG3    | brown |
| ILMN_2101930 | POLG    | brown |
| ILMN_1660840 | DESI2   | brown |
| ILMN_1737360 | TSPY26P | brown |
| ILMN_1790228 | FURIN   | brown |
| ILMN_2181125 | NAPB    | brown |
| ILMN_1768031 | DEDD2   | brown |
| ILMN_1736575 | TRIM28  | brown |
| ILMN_1811648 | DCAKD   | brown |
| ILMN_2380999 | RECQL   | brown |
| ILMN_2095840 | KAT6A   | brown |
| ILMN_1753249 | DDX10   | brown |
| ILMN_1691237 | CAP2    | brown |
| ILMN_2335669 | ZC3H14  | brown |
| ILMN_1708098 | LIX1L   | brown |
| ILMN_1756445 | PMF1    | brown |
| ILMN_1763523 | HARS    | brown |
| ILMN_1779353 | PUS7    | brown |
| ILMN_1891857 | RAB2A   | brown |
| ILMN_2211065 | TMEM91  | brown |
| ILMN_1796240 | TRAPPC8 | brown |
| ILMN_1815035 | DENND2C | brown |
| ILMN_1652333 | FN3KRP  | brown |
| ILMN_1788387 | UGGT2   | brown |
| ILMN_1768363 | BAP1    | brown |
| ILMN_1695430 | DDB1    | brown |

|              |           |       |
|--------------|-----------|-------|
| ILMN_1742544 | MEF2C     | brown |
| ILMN_2404688 | NUPR1     | brown |
| ILMN_1682180 | VCPIP1    | brown |
| ILMN_1778161 | DNAJC25   | brown |
| ILMN_1676289 | NCAM1     | brown |
| ILMN_1672759 | MCU       | brown |
| ILMN_2395856 | TMEM218   | brown |
| ILMN_1804679 | KAT8      | brown |
| ILMN_2062112 | ZC3H15    | brown |
| ILMN_1706571 | SLC35D2   | brown |
| ILMN_1793616 | RNF38     | brown |
| ILMN_2073732 | CBLL1     | brown |
| ILMN_1723124 | GALK2     | brown |
| ILMN_1746525 | FTH1P2    | brown |
| ILMN_1684051 | WASF2     | brown |
| ILMN_1689747 | NOL8      | brown |
| ILMN_2357577 | PRKAA1    | brown |
| ILMN_2246956 | BCL2      | brown |
| ILMN_1657470 | YTHDF3    | brown |
| ILMN_1795286 | C6orf47   | brown |
| ILMN_1720440 | HELQ      | brown |
| ILMN_1726990 | DOM3Z     | brown |
| ILMN_1687782 | RAD17     | brown |
| ILMN_1788416 | FAM108C1  | brown |
| ILMN_1784269 | AASDH     | brown |
| ILMN_2340052 | NCOR2     | brown |
| ILMN_1786601 | PLAGL2    | brown |
| ILMN_1719811 | REM1      | brown |
| ILMN_1777895 | LRRC37B   | brown |
| ILMN_1726030 | GPX7      | brown |
| ILMN_1713491 | VAMP2     | brown |
| ILMN_2204545 | ST3GAL4   | brown |
| ILMN_1737211 | ZNF585A   | brown |
| ILMN_1702592 | WDR73     | brown |
| ILMN_1768488 | TERF2     | brown |
| ILMN_1776674 | SAC3D1    | brown |
| ILMN_2173451 | GPI       | brown |
| ILMN_1755383 | LRRC1     | brown |
| ILMN_1800530 | AGAP1     | brown |
| ILMN_1732343 | SIK3      | brown |
| ILMN_2369682 | HNRNPA2B1 | brown |
| ILMN_1658498 | SLC44A3   | brown |
| ILMN_1796349 | SMPDL3A   | brown |
| ILMN_1749403 | TSPAN33   | brown |
| ILMN_1688034 | COIL      | brown |

|              |           |       |
|--------------|-----------|-------|
| ILMN_1694147 | PUS3      | brown |
| ILMN_1670420 | METAP2    | brown |
| ILMN_1806266 | RAP1GDS1  | brown |
| ILMN_1754795 | FAT1      | brown |
| ILMN_1700238 | ZNF500    | brown |
| ILMN_2397750 | IVNS1ABP  | brown |
| ILMN_1726064 | PAK1IP1   | brown |
| ILMN_1790741 | RNF126    | brown |
| ILMN_2325506 | BCAS4     | brown |
| ILMN_1654939 | TMED2     | brown |
| ILMN_1654920 | HNRNPH3   | brown |
| ILMN_1672004 | TOB1      | brown |
| ILMN_1747630 | DEK       | brown |
| ILMN_2349138 | CDC42SE1  | brown |
| ILMN_1795865 | FGFRL1    | brown |
| ILMN_1731609 | CHMP6     | brown |
| ILMN_1678808 | ATG14     | brown |
| ILMN_2234970 | SLC39A3   | brown |
| ILMN_1755677 | EMC9      | brown |
| ILMN_1730799 | PHF12     | brown |
| ILMN_1737344 | DDX41     | brown |
| ILMN_1773485 | QKI       | brown |
| ILMN_1692620 | ZNF263    | brown |
| ILMN_1670841 | CPNE1     | brown |
| ILMN_1709882 | ICK       | brown |
| ILMN_2320336 | CLK3      | brown |
| ILMN_1737964 | HIATL1    | brown |
| ILMN_1685551 | CHD4      | brown |
| ILMN_1710326 | CLDND1    | brown |
| ILMN_1729319 | USP7      | brown |
| ILMN_1711703 | C16orf70  | brown |
| ILMN_1727309 | FAM82A2   | brown |
| ILMN_1796710 | PHC1      | brown |
| ILMN_1789419 | EXOC3     | brown |
| ILMN_1682831 | NEB       | brown |
| ILMN_1699503 | UBE2D2    | brown |
| ILMN_1791376 | C15orf43  | brown |
| ILMN_1709630 | CCDC107   | brown |
| ILMN_1729563 | UGDH      | brown |
| ILMN_2106265 | GDPD1     | brown |
| ILMN_1817973 | LINC00302 | brown |
| ILMN_1744963 | ERO1L     | brown |
| ILMN_1807448 | FAM8A1    | brown |
| ILMN_1754529 | SPG7      | brown |
| ILMN_1655924 | TRNT1     | brown |

|              |          |       |
|--------------|----------|-------|
| ILMN_2061405 | NUP54    | brown |
| ILMN_1768510 | MAN2B2   | brown |
| ILMN_1669516 | ZNF193   | brown |
| ILMN_1727633 | PVRL3    | brown |
| ILMN_1774860 | UTP23    | brown |
| ILMN_1682792 | BYSL     | brown |
| ILMN_1728202 | SLC35G2  | brown |
| ILMN_1779347 | GARNL3   | brown |
| ILMN_1732609 | FAM214B  | brown |
| ILMN_1743204 | DUSP8    | brown |
| ILMN_1659854 | PRPF40A  | brown |
| ILMN_1670796 | EXOSC10  | brown |
| ILMN_1785330 | SH3BP4   | brown |
| ILMN_1759983 | DR1      | brown |
| ILMN_1659364 | RFC5     | brown |
| ILMN_1731049 | MGAT5    | brown |
| ILMN_2182704 | BIRC2    | brown |
| ILMN_1779404 | PUF60    | brown |
| ILMN_1784630 | KBTBD11  | brown |
| ILMN_1780582 | CD83     | brown |
| ILMN_1677133 | MITD1    | brown |
| ILMN_1688698 | ZEB2     | brown |
| ILMN_1810559 | RHOQ     | brown |
| ILMN_1716014 | RPL15P3  | brown |
| ILMN_1745807 | TMEM62   | brown |
| ILMN_1755114 | EIF2AK4  | brown |
| ILMN_1705953 | LONRF1   | brown |
| ILMN_1659976 | CLP1     | brown |
| ILMN_1721138 | GRPEL2   | brown |
| ILMN_2074258 | BARD1    | brown |
| ILMN_1692100 | ZNF35    | brown |
| ILMN_1780940 | PPP2R5D  | brown |
| ILMN_2269564 | ARID4B   | brown |
| ILMN_1773066 | CDKN2AIP | brown |
| ILMN_2242403 | DGUOK    | brown |
| ILMN_1765459 | S100A13  | brown |
| ILMN_2256359 | ZNF823   | brown |
| ILMN_1852384 | ERC1     | brown |
| ILMN_2328280 | ACTL6A   | brown |
| ILMN_1780058 | DEGS1    | brown |
| ILMN_1810719 | DCUN1D1  | brown |
| ILMN_1752927 | FAM160B1 | brown |
| ILMN_1757956 | PCGF1    | brown |
| ILMN_1676899 | YEATS2   | brown |
| ILMN_1661636 | ZMYM2    | brown |

|              |           |       |
|--------------|-----------|-------|
| ILMN_1797728 | HMGCS1    | brown |
| ILMN_1810712 | ARHGEF12  | brown |
| ILMN_2149766 | APPBP2    | brown |
| ILMN_1700518 | HMG4      | brown |
| ILMN_1804396 | IRF2BPL   | brown |
| ILMN_2196569 | NUP93     | brown |
| ILMN_1678423 | SPA17     | brown |
| ILMN_1667577 | LCMT2     | brown |
| ILMN_2221564 | LYAR      | brown |
| ILMN_1771651 | MON1B     | brown |
| ILMN_1726138 | EI24      | brown |
| ILMN_1653134 | CNEP1R1   | brown |
| ILMN_1687107 | RFWD3     | brown |
| ILMN_1794967 | EIF4ENIF1 | brown |
| ILMN_1742400 | CEP350    | brown |
| ILMN_1679655 | WDR82     | brown |
| ILMN_1758232 | GGCX      | brown |
| ILMN_1720282 | NQO1      | brown |
| ILMN_2106818 | MBIP      | brown |
| ILMN_1656413 | ZMPSTE24  | brown |
| ILMN_1709681 | GABRB3    | brown |
| ILMN_1731374 | CPE       | brown |
| ILMN_2337955 | ZMAT5     | brown |
| ILMN_1703471 | ATF6      | brown |
| ILMN_1814122 | MDC1      | brown |
| ILMN_1729987 | SRC       | brown |
| ILMN_1810147 | ZNF524    | brown |
| ILMN_1771057 | XAB2      | brown |
| ILMN_1797828 | DDRGK1    | brown |
| ILMN_1787628 | NOP56     | brown |
| ILMN_1763208 | ZNF10     | brown |
| ILMN_1768595 | DLG4      | brown |
| ILMN_1670609 | ATOX1     | brown |
| ILMN_2149782 | RAMP2     | brown |
| ILMN_1695745 | DISP1     | brown |
| ILMN_2188722 | GLS       | brown |
| ILMN_1712678 | RPS27L    | brown |
| ILMN_1654737 | TRIM32    | brown |
| ILMN_2065299 | EDEM3     | brown |
| ILMN_2213199 | CEP44     | brown |
| ILMN_1669555 | FAM48A    | brown |
| ILMN_1800871 | RAB6A     | brown |
| ILMN_1672940 | ZNF562    | brown |
| ILMN_1810486 | RAB34     | brown |
| ILMN_1679881 | WRN       | brown |

|              |          |       |
|--------------|----------|-------|
| ILMN_1811836 | DYNC2LI1 | brown |
| ILMN_1754842 | DLGAP4   | brown |
| ILMN_1761963 | C4orf29  | brown |
| ILMN_1776487 | TADA1    | brown |
| ILMN_1804454 | FAM135A  | brown |
| ILMN_2389347 | NR3C1    | brown |
| ILMN_1662331 | PDSS2    | brown |
| ILMN_1790202 | C1orf35  | brown |
| ILMN_1743755 | C6orf226 | brown |
| ILMN_1673804 | ZNF426   | brown |
| ILMN_1791006 | AHI1     | brown |
| ILMN_1664826 | FBXO33   | brown |
| ILMN_1697153 | ZDHHC17  | brown |
| ILMN_2299072 | LUC7L3   | brown |
| ILMN_2061185 | SH2B1    | brown |
| ILMN_1709439 | CHMP1A   | brown |
| ILMN_1703572 | PCDH20   | brown |
| ILMN_1712452 | KIF20B   | brown |
| ILMN_1673478 | FAM13B   | brown |
| ILMN_2373266 | SREK1    | brown |
| ILMN_1765001 | NAT6     | brown |
| ILMN_1733390 | LARP1B   | brown |
| ILMN_2117171 | LMO4     | brown |
| ILMN_1738656 | GLOD4    | brown |
| ILMN_2330861 | SMC4     | brown |
| ILMN_1810531 | DRG2     | brown |
| ILMN_2184640 | NOLC1    | brown |
| ILMN_1781983 | AP1B1    | brown |
| ILMN_1726798 | UBXN10   | brown |
| ILMN_2358914 | SLC35C2  | brown |
| ILMN_2131392 | WDR70    | brown |
| ILMN_1753143 | RHPN2    | brown |
| ILMN_1763326 | C5orf25  | brown |
| ILMN_1775759 | NRAS     | brown |
| ILMN_1655720 | CNNM4    | brown |
| ILMN_2094360 | NR2F2    | brown |
| ILMN_1736510 | FOXN2    | brown |
| ILMN_1757644 | UBE2H    | brown |
| ILMN_2129015 | AFF1     | brown |
| ILMN_1782110 | ZNF295   | brown |
| ILMN_2108357 | RPL39L   | brown |
| ILMN_1672564 | FMO6P    | brown |
| ILMN_1730631 | C2orf44  | brown |
| ILMN_1657797 | FIBP     | brown |
| ILMN_1721657 | RSU1     | brown |

|              |          |       |
|--------------|----------|-------|
| ILMN_1651557 | KDELC2   | brown |
| ILMN_1716445 | DTYMK    | brown |
| ILMN_1772743 | PIGK     | brown |
| ILMN_1760575 | PTP4A1   | brown |
| ILMN_1673892 | GK5      | brown |
| ILMN_1745501 | DNALI1   | brown |
| ILMN_1731714 | CREB5    | brown |
| ILMN_1697117 | TBP      | brown |
| ILMN_1667330 | ERVK3-1  | brown |
| ILMN_1774617 | NAB1     | brown |
| ILMN_1803779 | AP2A2    | brown |
| ILMN_1726986 | AADAT    | brown |
| ILMN_1681269 | DYRK4    | brown |
| ILMN_2397294 | PLCB4    | brown |
| ILMN_1792660 | CAMSAP2  | brown |
| ILMN_1678805 | POMT2    | brown |
| ILMN_2081883 | IQCK     | brown |
| ILMN_1718129 | MAP2K5   | brown |
| ILMN_1795166 | PTH1R    | brown |
| ILMN_1776325 | UBE2Q1   | brown |
| ILMN_2086238 | SMYD4    | brown |
| ILMN_1678766 | DYNLT1   | brown |
| ILMN_1651254 | LPP      | brown |
| ILMN_1752591 | LEPROTL1 | brown |
| ILMN_1791097 | RSBN1    | brown |
| ILMN_1702265 | HDHD2    | brown |
| ILMN_1671839 | TAF1C    | brown |
| ILMN_2282959 | DNA2     | brown |
| ILMN_1710268 | ZNF385D  | brown |
| ILMN_2196337 | ASUN     | brown |
| ILMN_2369756 | CEP112   | brown |
| ILMN_1681340 | HSPB11   | brown |
| ILMN_1732534 | CHMP5    | brown |
| ILMN_1651850 | RPS16    | brown |
| ILMN_1680037 | FAM65A   | brown |
| ILMN_1786036 | GPATCH2  | brown |
| ILMN_2393046 | NHLRC3   | brown |
| ILMN_2285618 | DIP2A    | brown |
| ILMN_1741572 | AKAP8    | brown |
| ILMN_2287157 | DST      | brown |
| ILMN_1664466 | KLHL9    | brown |
| ILMN_1774350 | MYOZ3    | brown |
| ILMN_1751326 | FAM162B  | brown |
| ILMN_1736135 | TYW1     | brown |
| ILMN_1771800 | PRKCA    | brown |

|              |          |       |
|--------------|----------|-------|
| ILMN_1794490 | PNMAL1   | brown |
| ILMN_1780987 | RFXANK   | brown |
| ILMN_2363621 | RBBP8    | brown |
| ILMN_1763723 | PTDSS2   | brown |
| ILMN_1697218 | MED22    | brown |
| ILMN_1797793 | BLVRB    | brown |
| ILMN_1801869 | WDR75    | brown |
| ILMN_1761259 | EXT2     | brown |
| ILMN_1736048 | ELL      | brown |
| ILMN_1801600 | CCDC97   | brown |
| ILMN_1679731 | SLC15A4  | brown |
| ILMN_1794965 | ABCA4    | brown |
| ILMN_1731666 | ZNF641   | brown |
| ILMN_1733115 | RALGAPB  | brown |
| ILMN_1653429 | SLC35A3  | brown |
| ILMN_1697544 | SLC25A29 | brown |
| ILMN_1730999 | TPR      | brown |
| ILMN_1774028 | MTFR1    | brown |
| ILMN_2172174 | PNP      | brown |
| ILMN_1809583 | CREBBP   | brown |
| ILMN_1719286 | CTSA     | brown |
| ILMN_2195821 | CREBRF   | brown |
| ILMN_1677113 | RNF8     | brown |
| ILMN_1770378 | ANAPC10  | brown |
| ILMN_1662340 | ZNF358   | brown |
| ILMN_1783798 | GAS8     | brown |
| ILMN_2082244 | FOXK1    | brown |
| ILMN_2106227 | KIAA2026 | brown |
| ILMN_1685095 | CNO      | brown |
| ILMN_1681356 | PDE2A    | brown |
| ILMN_2278636 | CUX1     | brown |
| ILMN_1712019 | ANKRD17  | brown |
| ILMN_1809889 | CCDC117  | brown |
| ILMN_1800420 | RNF214   | brown |
| ILMN_1771411 | ALG6     | brown |
| ILMN_1669905 | DCP2     | brown |
| ILMN_1793632 | TMEM222  | brown |
| ILMN_1699112 | COPB1    | brown |
| ILMN_1739210 | NSL1     | brown |
| ILMN_1739083 | SIRT1    | brown |
| ILMN_2324574 | RALGAPA1 | brown |
| ILMN_1785711 | NEDD8    | brown |
| ILMN_1769545 | PRPF19   | brown |
| ILMN_1799113 | CCDC41   | brown |
| ILMN_2069446 | SAFB2    | brown |

|              |          |       |
|--------------|----------|-------|
| ILMN_1659857 | SNAP29   | brown |
| ILMN_1773148 | MSANTD2  | brown |
| ILMN_1768483 | KCNK3    | brown |
| ILMN_1721703 | PNN      | brown |
| ILMN_1745079 | TRIM2    | brown |
| ILMN_1688346 | ZNF800   | brown |
| ILMN_1815578 | ZNF223   | brown |
| ILMN_2084059 | SLC12A4  | brown |
| ILMN_1781795 | ERH      | brown |
| ILMN_2344047 | ZNF398   | brown |
| ILMN_1810229 | ARID4A   | brown |
| ILMN_1680693 | ZNF419   | brown |
| ILMN_1691339 | CLEC1A   | brown |
| ILMN_1736623 | NCKIPSD  | brown |
| ILMN_1766366 | ICA1L    | brown |
| ILMN_1738736 | SNX4     | brown |
| ILMN_1747183 | GXYLT1   | brown |
| ILMN_1796113 | BCDIN3D  | brown |
| ILMN_1793017 | DGKQ     | brown |
| ILMN_1728435 | C12orf45 | brown |
| ILMN_2352090 | GPRC5C   | brown |
| ILMN_1684402 | STXBP5   | brown |
| ILMN_2203807 | MRP63    | brown |
| ILMN_1657050 | ARSK     | brown |
| ILMN_1740395 | RAVER1   | brown |
| ILMN_2087303 | XKR8     | brown |
| ILMN_2151048 | STAG1    | brown |
| ILMN_1722066 | ARMC1    | brown |
| ILMN_1713505 | NPC1     | brown |
| ILMN_1658902 | DEAF1    | brown |
| ILMN_1811373 | FAM20B   | brown |
| ILMN_1676799 | MFAP1    | brown |
| ILMN_1741131 | CHRNA1   | brown |
| ILMN_2360291 | UGGT1    | brown |
| ILMN_1811616 | EEDP1    | cyan  |
| ILMN_1692058 | NDN      | cyan  |
| ILMN_1814044 | CABIN1   | cyan  |
| ILMN_1793651 | UBE2N    | cyan  |
| ILMN_1754531 | AP4E1    | cyan  |
| ILMN_1693004 | SOGA1    | cyan  |
| ILMN_1711102 | B3GNT2   | cyan  |
| ILMN_1747934 | ISYNA1   | cyan  |
| ILMN_1758941 | REEP5    | cyan  |
| ILMN_1730765 | DUSP22   | cyan  |
| ILMN_1711888 | COBL     | cyan  |

|              |          |      |
|--------------|----------|------|
| ILMN_1732197 | MN1      | cyan |
| ILMN_2230862 | GYG1     | cyan |
| ILMN_2211479 | MAEL     | cyan |
| ILMN_2340565 | ATP2C1   | cyan |
| ILMN_1683415 | CAMK2D   | cyan |
| ILMN_1677092 | GEM      | cyan |
| ILMN_1733746 | REEP1    | cyan |
| ILMN_1659936 | PPP1R15A | cyan |
| ILMN_1656656 | COX19    | cyan |
| ILMN_2400874 | SCYL1    | cyan |
| ILMN_1773780 | FAM173A  | cyan |
| ILMN_1758731 | CYP2J2   | cyan |
| ILMN_1728742 | C5orf4   | cyan |
| ILMN_1739253 | STAMBP   | cyan |
| ILMN_1696190 | STRN4    | cyan |
| ILMN_2121408 | HBEGF    | cyan |
| ILMN_1690253 | SYNPO2L  | cyan |
| ILMN_1760593 | CRY1     | cyan |
| ILMN_1810191 | PLA2G4C  | cyan |
| ILMN_2176592 | BCHE     | cyan |
| ILMN_1794875 | AGPAT9   | cyan |
| ILMN_1664560 | DYRK1A   | cyan |
| ILMN_1750256 | ALS2     | cyan |
| ILMN_1699856 | RALGDS   | cyan |
| ILMN_1765060 | FBXO34   | cyan |
| ILMN_1685574 | TSC22D2  | cyan |
| ILMN_1652486 | THAP7    | cyan |
| ILMN_1794056 | DNAJB5   | cyan |
| ILMN_1798212 | LLGL1    | cyan |
| ILMN_1762426 | DHFRL1   | cyan |
| ILMN_1669550 | MAD2L2   | cyan |
| ILMN_1754988 | N6AMT1   | cyan |
| ILMN_1743340 | CHST14   | cyan |
| ILMN_1759097 | MLLT11   | cyan |
| ILMN_1813361 | ANGPTL7  | cyan |
| ILMN_1663042 | SDC4     | cyan |
| ILMN_1796801 | ABCA8    | cyan |
| ILMN_1778561 | WEE1     | cyan |
| ILMN_1805765 | CMYA5    | cyan |
| ILMN_1725183 | TBCE     | cyan |
| ILMN_1801387 | YEATS4   | cyan |
| ILMN_1750674 | SDSL     | cyan |
| ILMN_1781386 | WIPI1    | cyan |
| ILMN_1697567 | TPM3     | cyan |
| ILMN_1660582 | LIG3     | cyan |

|              |          |      |
|--------------|----------|------|
| ILMN_1701052 | TUBG2    | cyan |
| ILMN_1787265 | ZNF503   | cyan |
| ILMN_1655307 | FAM136A  | cyan |
| ILMN_1683178 | JAK2     | cyan |
| ILMN_1812776 | FBXO28   | cyan |
| ILMN_1780671 | PLEKHG3  | cyan |
| ILMN_1773567 | LAMA5    | cyan |
| ILMN_1748591 | ODC1     | cyan |
| ILMN_1765076 | APPL2    | cyan |
| ILMN_1718766 | MT1F     | cyan |
| ILMN_1716766 | CEBPG    | cyan |
| ILMN_2062754 | SRA1     | cyan |
| ILMN_2316104 | IQCB1    | cyan |
| ILMN_1720501 | ABCA9    | cyan |
| ILMN_1751362 | FASTKD1  | cyan |
| ILMN_1810054 | CNN1     | cyan |
| ILMN_1740842 | SALL2    | cyan |
| ILMN_1808196 | GSTO1    | cyan |
| ILMN_1715543 | ACOT1    | cyan |
| ILMN_1656415 | CDKN2C   | cyan |
| ILMN_2125869 | ACTA1    | cyan |
| ILMN_1759952 | PSMA5    | cyan |
| ILMN_1678678 | SLC37A4  | cyan |
| ILMN_1743219 | CA11     | cyan |
| ILMN_1707084 | UBE2D4   | cyan |
| ILMN_1667670 | SLC25A15 | cyan |
| ILMN_1660551 | CRAMP1L  | cyan |
| ILMN_1732271 | BTBD9    | cyan |
| ILMN_1666512 | SKIV2L   | cyan |
| ILMN_1667893 | TNS3     | cyan |
| ILMN_1754279 | FBXW7    | cyan |
| ILMN_1716093 | KRT10    | cyan |
| ILMN_1757845 | SPIRE1   | cyan |
| ILMN_1708906 | C2orf29  | cyan |
| ILMN_1715273 | PICALM   | cyan |
| ILMN_1675131 | PIH1D1   | cyan |
| ILMN_1735827 | NISCH    | cyan |
| ILMN_1660732 | PPP2R2B  | cyan |
| ILMN_2375418 | DPH2     | cyan |
| ILMN_1810716 | GFRA3    | cyan |
| ILMN_1741392 | SLC25A20 | cyan |
| ILMN_1676897 | HSPA12B  | cyan |
| ILMN_1667519 | RRAS2    | cyan |
| ILMN_1800354 | CST3     | cyan |
| ILMN_1745385 | HNRNPM   | cyan |

|              |          |       |
|--------------|----------|-------|
| ILMN_1744914 | FUCA2    | cyan  |
| ILMN_2286334 | U2SURP   | cyan  |
| ILMN_1783149 | CDH23    | cyan  |
| ILMN_1656837 | RBP1     | cyan  |
| ILMN_2296843 | GCDH     | cyan  |
| ILMN_1713266 | FAM46C   | cyan  |
| ILMN_1713751 | ADAM19   | cyan  |
| ILMN_1729402 | CHRM2    | cyan  |
| ILMN_1728168 | SLMO2    | cyan  |
| ILMN_2413259 | SOCS4    | cyan  |
| ILMN_1801516 | GPC1     | cyan  |
| ILMN_1785202 | STAT4    | cyan  |
| ILMN_1651336 | MLYCD    | cyan  |
| ILMN_1748797 | GRB2     | cyan  |
| ILMN_1654854 | MURC     | cyan  |
| ILMN_1729453 | TSPAN9   | cyan  |
| ILMN_1773964 | H1FX     | cyan  |
| ILMN_2170515 | NTMT1    | cyan  |
| ILMN_1697642 | BCAP29   | green |
| ILMN_1706553 | SMG7     | green |
| ILMN_1679476 | GART     | green |
| ILMN_1655485 | SPRTN    | green |
| ILMN_1691428 | PSMD12   | green |
| ILMN_1671895 | ZNF613   | green |
| ILMN_1749738 | NECAB3   | green |
| ILMN_1654212 | DOK7     | green |
| ILMN_2356895 | MRPL42   | green |
| ILMN_1669484 | WDR6     | green |
| ILMN_2408450 | UBA5     | green |
| ILMN_1673773 | GALNTL4  | green |
| ILMN_1722811 | CDKN1B   | green |
| ILMN_1748109 | PEX1     | green |
| ILMN_1738272 | DHX36    | green |
| ILMN_1712888 | HSPH1    | green |
| ILMN_1789283 | PPP2R5C  | green |
| ILMN_1768271 | SMAP1    | green |
| ILMN_1810423 | RPP40    | green |
| ILMN_1751803 | LSM10    | green |
| ILMN_1814327 | AGTR1    | green |
| ILMN_1672102 | PTPRB    | green |
| ILMN_1653504 | S1PR1    | green |
| ILMN_1719622 | RABEP1   | green |
| ILMN_1747217 | C15orf41 | green |
| ILMN_1689162 | ACTR8    | green |
| ILMN_1813801 | PSMC1P9  | green |

|              |          |       |
|--------------|----------|-------|
| ILMN_1755737 | TRABD    | green |
| ILMN_1814622 | GIN1     | green |
| ILMN_1738075 | CMIP     | green |
| ILMN_2246661 | FAHD1    | green |
| ILMN_1671452 | MRPL44   | green |
| ILMN_1718023 | APEH     | green |
| ILMN_1678612 | ANXA6    | green |
| ILMN_2150352 | CBWD5    | green |
| ILMN_1821280 | GDF11    | green |
| ILMN_2406410 | RHBDD2   | green |
| ILMN_2060770 | RAI1     | green |
| ILMN_1705774 | TIGD5    | green |
| ILMN_1700001 | TCTA     | green |
| ILMN_1805345 | MOSPD3   | green |
| ILMN_1807807 | SKA2     | green |
| ILMN_2394438 | FAM177A1 | green |
| ILMN_1808792 | ALKBH6   | green |
| ILMN_1725791 | PTPLA    | green |
| ILMN_1758474 | PRKRA    | green |
| ILMN_1795285 | PHF15    | green |
| ILMN_2408039 | EEF1D    | green |
| ILMN_1803317 | C9orf114 | green |
| ILMN_2072296 | CKS2     | green |
| ILMN_1688606 | RNFT1    | green |
| ILMN_1732772 | PPME1    | green |
| ILMN_1783675 | ASB8     | green |
| ILMN_1813573 | SETD1B   | green |
| ILMN_1739885 | SLC41A3  | green |
| ILMN_1771966 | BCCIP    | green |
| ILMN_1689123 | CCNK     | green |
| ILMN_1674337 | FKBP2    | green |
| ILMN_1757272 | THAP1    | green |
| ILMN_1687384 | IFI6     | green |
| ILMN_1756439 | SCRN1    | green |
| ILMN_1694240 | MAP2K1   | green |
| ILMN_1688629 | ZNF274   | green |
| ILMN_1692413 | NMNAT1   | green |
| ILMN_2161832 | VPS37A   | green |
| ILMN_1700811 | UBFD1    | green |
| ILMN_1742577 | GTPBP4   | green |
| ILMN_1696311 | IMPAD1   | green |
| ILMN_1758750 | EARS2    | green |
| ILMN_1763634 | PEX14    | green |
| ILMN_2072140 | BTF3L4   | green |
| ILMN_1791593 | DENND5B  | green |

|              |          |       |
|--------------|----------|-------|
| ILMN_1729237 | CYB5R1   | green |
| ILMN_1697548 | LPHN2    | green |
| ILMN_1711023 | CDK5RAP1 | green |
| ILMN_1692276 | GGPS1    | green |
| ILMN_1703316 | PRR24    | green |
| ILMN_1653612 | KCTD9    | green |
| ILMN_1791093 | PPHLN1   | green |
| ILMN_1708936 | EXOSC3   | green |
| ILMN_1722025 | CPEB4    | green |
| ILMN_1800935 | ARV1     | green |
| ILMN_1797082 | SNX13    | green |
| ILMN_1693045 | TMED1    | green |
| ILMN_2136635 | ISCA2    | green |
| ILMN_1778177 | ZNF207   | green |
| ILMN_1743582 | NUDT22   | green |
| ILMN_1744822 | BECN1    | green |
| ILMN_1722858 | PPP2CA   | green |
| ILMN_1765644 | COMMD8   | green |
| ILMN_1746856 | RAB21    | green |
| ILMN_1681543 | RHBDD1   | green |
| ILMN_1747204 | HTRA2    | green |
| ILMN_1781721 | DDX31    | green |
| ILMN_2182198 | ICT1     | green |
| ILMN_1757995 | PARP2    | green |
| ILMN_1814856 | CACFD1   | green |
| ILMN_1663489 | UBR2     | green |
| ILMN_1724497 | ABI2     | green |
| ILMN_1719343 | WDR26    | green |
| ILMN_1731113 | ZBTB43   | green |
| ILMN_1664833 | MRPL50   | green |
| ILMN_1733930 | PREB     | green |
| ILMN_1670752 | KIAA0907 | green |
| ILMN_1805271 | ZNF721   | green |
| ILMN_1735453 | FAM98A   | green |
| ILMN_1815319 | CMTM4    | green |
| ILMN_2058512 | PSMA2    | green |
| ILMN_1721024 | SRFBP1   | green |
| ILMN_1715635 | ATP6V0E1 | green |
| ILMN_1694799 | PIAS2    | green |
| ILMN_1800540 | CD55     | green |
| ILMN_1676523 | CCDC91   | green |
| ILMN_1659544 | STX3     | green |
| ILMN_1778255 | FARSA    | green |
| ILMN_1708502 | AFF4     | green |
| ILMN_1694174 | TRIM68   | green |

|              |         |       |
|--------------|---------|-------|
| ILMN_1745620 | KRCC1   | green |
| ILMN_1805216 | GPC6    | green |
| ILMN_1753719 | GTF2A2  | green |
| ILMN_1803073 | DNAJC12 | green |
| ILMN_1804445 | ATF7IP2 | green |
| ILMN_2054725 | SUGT1   | green |
| ILMN_1657754 | RPAP2   | green |
| ILMN_1666924 | PINK1   | green |
| ILMN_1651229 | IPO13   | green |
| ILMN_1698243 | C1orf85 | green |
| ILMN_2372398 | ALDH5A1 | green |
| ILMN_2105253 | PTGR2   | green |
| ILMN_1726839 | DCUN1D5 | green |
| ILMN_1764091 | R3HDM2  | green |
| ILMN_1682774 | TEX30   | green |
| ILMN_2358783 | ASB3    | green |
| ILMN_1804851 | MRPS17  | green |
| ILMN_2206272 | D2HGDH  | green |
| ILMN_1685480 | TARS    | green |
| ILMN_1707858 | H2AFZ   | green |
| ILMN_1701058 | TATDN1  | green |
| ILMN_1781457 | TIPRL   | green |
| ILMN_1776850 | NMRK2   | green |
| ILMN_1682864 | SPSB3   | green |
| ILMN_1753413 | TRIOBP  | green |
| ILMN_1727524 | ADAM9   | green |
| ILMN_1712556 | ZW10    | green |
| ILMN_2234016 | FTH1P7  | green |
| ILMN_1654287 | ADCY9   | green |
| ILMN_1741406 | HOOK1   | green |
| ILMN_1662426 | AP2S1   | green |
| ILMN_1716004 | NSUN4   | green |
| ILMN_1669142 | NAA15   | green |
| ILMN_1790534 | MAP2K3  | green |
| ILMN_1694491 | CCNG1   | green |
| ILMN_2222992 | ETF1    | green |
| ILMN_1796855 | TIAL1   | green |
| ILMN_1692707 | PTRHD1  | green |
| ILMN_1697793 | SYNJ2BP | green |
| ILMN_1706990 | ZNF271  | green |
| ILMN_1670439 | FYTTD1  | green |
| ILMN_2096719 | GRK5    | green |
| ILMN_1706426 | DSTN    | green |
| ILMN_2206554 | SLC35F5 | green |
| ILMN_1661173 | TRIP4   | green |

|              |          |       |
|--------------|----------|-------|
| ILMN_2411190 | SMC2     | green |
| ILMN_1791328 | STK39    | green |
| ILMN_1695092 | WRB      | green |
| ILMN_1748018 | GORASP2  | green |
| ILMN_1804610 | NFX1     | green |
| ILMN_1714809 | RPIA     | green |
| ILMN_2198376 | PSMA4    | green |
| ILMN_1678494 | ZNF438   | green |
| ILMN_1700028 | C9orf156 | green |
| ILMN_1660837 | CLCN3    | green |
| ILMN_2391400 | PITX2    | green |
| ILMN_1730260 | N6AMT2   | green |
| ILMN_1657446 | NTPCR    | green |
| ILMN_1793040 | ADAMTSL5 | green |
| ILMN_1766010 | YARS     | green |
| ILMN_1730391 | MRPS18A  | green |
| ILMN_1761031 | PTPDC1   | green |
| ILMN_1785268 | CD58     | green |
| ILMN_2217630 | CDKL3    | green |
| ILMN_1686920 | CCDC58   | green |
| ILMN_1701644 | PCDHGB6  | green |
| ILMN_1658486 | MRPL54   | green |
| ILMN_1755405 | PGAP2    | green |
| ILMN_1665547 | CADPS    | green |
| ILMN_2398995 | MRPL24   | green |
| ILMN_1698323 | PLEKHB2  | green |
| ILMN_1674399 | ZNF143   | green |
| ILMN_1655765 | MRPS21   | green |
| ILMN_1788203 | HEY1     | green |
| ILMN_1716465 | RBP7     | green |
| ILMN_1702806 | PDCL3    | green |
| ILMN_1680171 | MFF      | green |
| ILMN_1761262 | MPI      | green |
| ILMN_1726842 | TYW3     | green |
| ILMN_1681590 | LARP1    | green |
| ILMN_1768050 | SCOC     | green |
| ILMN_1705301 | TEAD4    | green |
| ILMN_2162989 | TMEM189  | green |
| ILMN_1773760 | PAICS    | green |
| ILMN_1794863 | CAMK2N1  | green |
| ILMN_1696087 | PHB2     | green |
| ILMN_1652846 | PCYT2    | green |
| ILMN_2079285 | ATP5L    | green |
| ILMN_1655329 | RIOK2    | green |
| ILMN_1713732 | ABL1     | green |

|              |          |       |
|--------------|----------|-------|
| ILMN_1653367 | TAF12    | green |
| ILMN_1671158 | MRPL13   | green |
| ILMN_2192032 | SRP19    | green |
| ILMN_2140700 | CRIPAK   | green |
| ILMN_1775269 | EID1     | green |
| ILMN_2056479 | GLRX3    | green |
| ILMN_1724410 | USP46    | green |
| ILMN_1705397 | PDK2     | green |
| ILMN_1749009 | REXO2    | green |
| ILMN_1809344 | BTBD10   | green |
| ILMN_1815345 | EIF3J    | green |
| ILMN_1731137 | TXNDC9   | green |
| ILMN_1794599 | SNRPD3   | green |
| ILMN_1757408 | ZNF256   | green |
| ILMN_2257665 | PARL     | green |
| ILMN_1730639 | SLC22A15 | green |
| ILMN_1658800 | BRPF3    | green |
| ILMN_1749432 | MRPL32   | green |
| ILMN_1682232 | MIER1    | green |
| ILMN_1728887 | PAK4     | green |
| ILMN_1767337 | SFXN5    | green |
| ILMN_1744146 | PTTG2    | green |
| ILMN_2262288 | EEF1G    | green |
| ILMN_1756935 | OSBPL6   | green |
| ILMN_1737308 | GLRX     | green |
| ILMN_1679520 | AGPAT1   | green |
| ILMN_1676905 | TIGD7    | green |
| ILMN_1724194 | NPEPL1   | green |
| ILMN_1776157 | SEPT4    | green |
| ILMN_1761996 | SRSF5    | green |
| ILMN_1786396 | ZZEF1    | green |
| ILMN_1778121 | CALN1    | green |
| ILMN_1683916 | PEX13    | green |
| ILMN_2043816 | ARPC5L   | green |
| ILMN_1705783 | NXF1     | green |
| ILMN_1697503 | DHX29    | green |
| ILMN_1665526 | TCEA2    | green |
| ILMN_1720311 | SLC25A46 | green |
| ILMN_1670456 | RBM42    | green |
| ILMN_1714623 | TOMM22   | green |
| ILMN_2351611 | UBQLN1   | green |
| ILMN_1759325 | C16orf91 | green |
| ILMN_2398587 | ZNRD1    | green |
| ILMN_1765829 | NUFIP2   | green |
| ILMN_1784292 | ANKMY2   | green |

|              |          |       |
|--------------|----------|-------|
| ILMN_1719158 | CTBP1    | green |
| ILMN_2323633 | TPD52L2  | green |
| ILMN_1801913 | PPIH     | green |
| ILMN_1718853 | UQCRC2   | green |
| ILMN_1768743 | FIP1L1   | green |
| ILMN_1804568 | HOMER1   | green |
| ILMN_1700507 | CLASP1   | green |
| ILMN_1674780 | SF3B1    | green |
| ILMN_2148527 | H19      | green |
| ILMN_1652638 | LRRC58   | green |
| ILMN_1683065 | COA5     | green |
| ILMN_1808305 | RTCA     | green |
| ILMN_1745021 | SLC30A1  | green |
| ILMN_2228873 | STARD3NL | green |
| ILMN_1688479 | LRRC42   | green |
| ILMN_1659099 | ROCK2    | green |
| ILMN_2148847 | AKIRIN2  | green |
| ILMN_2129349 | TSSC1    | green |
| ILMN_1703441 | ZNF593   | green |
| ILMN_1793672 | SIX5     | green |
| ILMN_2142979 | PTBP2    | green |
| ILMN_1662306 | RABL3    | green |
| ILMN_1763730 | APPL1    | green |
| ILMN_1658678 | SAAL1    | green |
| ILMN_1809292 | IMMP2L   | green |
| ILMN_1657624 | NSFL1C   | green |
| ILMN_2365307 | CD276    | green |
| ILMN_1684520 | TSTD2    | green |
| ILMN_1761968 | PPP1R14A | green |
| ILMN_2139035 | CASD1    | green |
| ILMN_1736562 | TRIM39   | green |
| ILMN_2054652 | TYRP1    | green |
| ILMN_1729417 | GNE      | green |
| ILMN_1651364 | PCBD2    | green |
| ILMN_1695362 | ZNF32    | green |
| ILMN_2224444 | SNX25    | green |
| ILMN_1675669 | IBTK     | green |
| ILMN_1665291 | NUB1     | green |
| ILMN_1753712 | STX10    | green |
| ILMN_1802251 | PTTG1IP  | green |
| ILMN_1761961 | CCDC90A  | green |
| ILMN_1759008 | ZNF689   | green |
| ILMN_1778557 | CDK13    | green |
| ILMN_2148290 | PDCD7    | green |
| ILMN_1789702 | GBE1     | green |

|              |          |       |
|--------------|----------|-------|
| ILMN_2403730 | ATP6V1H  | green |
| ILMN_1751075 | SETD4    | green |
| ILMN_1704452 | BCL9     | green |
| ILMN_2104784 | FKBP3    | green |
| ILMN_1705346 | NBEA     | green |
| ILMN_1756910 | PLA2G15  | green |
| ILMN_1764628 | LYPLA2   | green |
| ILMN_2415439 | NAE1     | green |
| ILMN_1691789 | SMNDC1   | green |
| ILMN_1699496 | PHF21A   | green |
| ILMN_2284591 | OPA3     | green |
| ILMN_1725700 | MOV10    | green |
| ILMN_1780189 | PSMC5    | green |
| ILMN_1720241 | TRIP12   | green |
| ILMN_2061452 | ORC2     | green |
| ILMN_2153280 | EMC1     | green |
| ILMN_1738229 | NDRG3    | green |
| ILMN_2054362 | SLC25A40 | green |
| ILMN_1795911 | TTC37    | green |
| ILMN_1652907 | CDC5L    | green |
| ILMN_1682494 | RSRC1    | green |
| ILMN_1784946 | ORC3     | green |
| ILMN_1676075 | KLHL12   | green |
| ILMN_1797576 | PLEKHA3  | green |
| ILMN_1728224 | OGFR     | green |
| ILMN_2309446 | RBBP6    | green |
| ILMN_1657153 | ACTR3    | green |
| ILMN_1798354 | PAPOLA   | green |
| ILMN_1809010 | PSMC3    | green |
| ILMN_1748767 | H3F3AP6  | green |
| ILMN_1693226 | C1orf212 | green |
| ILMN_1667707 | SPCS3    | green |
| ILMN_1798804 | SRPK1    | green |
| ILMN_1746257 | DAZAP1   | green |
| ILMN_1738529 | BCS1L    | green |
| ILMN_1758128 | CYGB     | green |
| ILMN_2381197 | RNF19A   | green |
| ILMN_1757287 | MAPK6    | green |
| ILMN_1713449 | TBX3     | green |
| ILMN_1890773 | PDE1C    | green |
| ILMN_1764230 | GNPTG    | green |
| ILMN_1769911 | SLC38A1  | green |
| ILMN_1764043 | TTL      | green |
| ILMN_1717099 | DSCR3    | green |
| ILMN_2080751 | ADNP2    | green |

|              |           |             |
|--------------|-----------|-------------|
| ILMN_1749521 | SLC35E3   | green       |
| ILMN_1812618 | ARAP3     | green       |
| ILMN_1729179 | SPATA5L1  | green       |
| ILMN_1709549 | PLEKHM1   | green       |
| ILMN_2309926 | ZDHHC14   | green       |
| ILMN_1758679 | TMEM168   | green       |
| ILMN_1664798 | GRHPR     | green       |
| ILMN_1801040 | SPN       | greenyellow |
| ILMN_1656625 | RPS24     | greenyellow |
| ILMN_1748968 | ATG10     | greenyellow |
| ILMN_2189869 | FCF1      | greenyellow |
| ILMN_2054213 | MPHOSPH8  | greenyellow |
| ILMN_2115949 | ZNF394    | greenyellow |
| ILMN_2055310 | MBD4      | greenyellow |
| ILMN_2150465 | C5orf28   | greenyellow |
| ILMN_1812105 | PIP4K2B   | greenyellow |
| ILMN_2134381 | ITPK1-AS1 | greenyellow |
| ILMN_2279834 | ZNF483    | greenyellow |
| ILMN_2105966 | SLC35A4   | greenyellow |
| ILMN_1755115 | RPL23     | greenyellow |
| ILMN_2249473 | SPTLC1    | greenyellow |
| ILMN_1757074 | GNG10     | greenyellow |
| ILMN_2112402 | PHF5A     | greenyellow |
| ILMN_1707810 | RPS5      | greenyellow |
| ILMN_1698968 | ASXL2     | greenyellow |
| ILMN_1702899 | PLEKHA7   | greenyellow |
| ILMN_2334243 | CREB1     | greenyellow |
| ILMN_2342455 | PPA2      | greenyellow |
| ILMN_2209578 | AGAP6     | greenyellow |
| ILMN_2326997 | DHPS      | greenyellow |
| ILMN_1713706 | ZNF786    | greenyellow |
| ILMN_2273224 | SLC4A5    | greenyellow |
| ILMN_2251184 | ERP29     | greenyellow |
| ILMN_1673529 | AGXT2L2   | greenyellow |
| ILMN_1757317 | LARS      | greenyellow |
| ILMN_2192694 | EIF3M     | greenyellow |
| ILMN_2188119 | ARL16     | greenyellow |
| ILMN_2079098 | INIP      | greenyellow |
| ILMN_2123312 | ERAP2     | greenyellow |
| ILMN_1691499 | TJP1      | greenyellow |
| ILMN_2404795 | SULT1A1   | greenyellow |
| ILMN_1745994 | GAS7      | greenyellow |
| ILMN_2215382 | DDX51     | greenyellow |
| ILMN_2049364 | METTL21A  | greenyellow |
| ILMN_2187533 | CSRNP2    | greenyellow |

|              |          |             |
|--------------|----------|-------------|
| ILMN_1742889 | WDR77    | greenyellow |
| ILMN_2262275 | TRIM13   | greenyellow |
| ILMN_2161007 | GABPB2   | greenyellow |
| ILMN_1721128 | TOMM34   | greenyellow |
| ILMN_1698020 | DLC1     | greenyellow |
| ILMN_2078547 | C7orf55  | greenyellow |
| ILMN_2185884 | DHRS4    | greenyellow |
| ILMN_2188204 | ATG12    | greenyellow |
| ILMN_1744034 | GPR27    | greenyellow |
| ILMN_1694399 | ICA1     | greenyellow |
| ILMN_1760303 | PIK3R1   | greenyellow |
| ILMN_1657361 | CBX7     | greenyellow |
| ILMN_1802519 | VPS36    | greenyellow |
| ILMN_2361104 | ZMAT3    | greenyellow |
| ILMN_2105033 | PLDN     | greenyellow |
| ILMN_2154322 | SEMA3E   | greenyellow |
| ILMN_1730678 | ANKRD30B | greenyellow |
| ILMN_1798705 | CCNC     | greenyellow |
| ILMN_2371590 | DDX17    | greenyellow |
| ILMN_1699980 | TSPAN18  | greenyellow |
| ILMN_2383305 | GPATCH4  | greenyellow |
| ILMN_2288483 | CEP19    | greenyellow |
| ILMN_1795026 | FAM189B  | greenyellow |
| ILMN_1675130 | NFIC     | greenyellow |
| ILMN_1794522 | EIF5A    | greenyellow |
| ILMN_1785703 | LMOD3    | greenyellow |
| ILMN_2051684 | C4orf3   | greenyellow |
| ILMN_1774828 | VEZT     | greenyellow |
| ILMN_2285713 | TDP1     | greenyellow |
| ILMN_1705871 | DDHD2    | greenyellow |
| ILMN_2054928 | XPNPEP3  | greenyellow |
| ILMN_1653412 | RAX2     | greenyellow |
| ILMN_1769416 | TTN      | greenyellow |
| ILMN_2392635 | ABCF1    | greenyellow |
| ILMN_1689446 | EIF3G    | greenyellow |
| ILMN_2411897 | KLF10    | greenyellow |
| ILMN_2270845 | WDR74    | greenyellow |
| ILMN_1856634 | NFIA     | greenyellow |
| ILMN_1736704 | DIXDC1   | greenyellow |
| ILMN_2051900 | EID2B    | greenyellow |
| ILMN_1651936 | SETD8    | greenyellow |
| ILMN_1670134 | FADS1    | greenyellow |
| ILMN_1798581 | MCM8     | greenyellow |
| ILMN_1771627 | ZMIZ1    | greenyellow |
| ILMN_1737343 | FNIP1    | greenyellow |

|              |          |             |
|--------------|----------|-------------|
| ILMN_2175094 | TDRD1    | greenyellow |
| ILMN_2274775 | SLC44A4  | greenyellow |
| ILMN_1781151 | ARMC8    | greenyellow |
| ILMN_2278908 | GGA1     | greenyellow |
| ILMN_1693789 | ALPP     | greenyellow |
| ILMN_2286014 | CATSPER2 | greenyellow |
| ILMN_2176882 | ZNF69    | greenyellow |
| ILMN_1801703 | CPLX1    | greenyellow |
| ILMN_2377900 | MAP1B    | greenyellow |
| ILMN_1677910 | EEF1DP3  | greenyellow |
| ILMN_2383693 | UPF2     | greenyellow |
| ILMN_1658144 | TRIP11   | greenyellow |
| ILMN_1689552 | FAM63A   | greenyellow |
| ILMN_1708805 | NCOA3    | greenyellow |
| ILMN_1693293 | EFCAB4B  | greenyellow |
| ILMN_1806304 | ENTPD4   | greenyellow |
| ILMN_2059173 | SLC35E1  | greenyellow |
| ILMN_1752793 | SAP18    | greenyellow |
| ILMN_2054554 | DTWD2    | greenyellow |
| ILMN_2106658 | BLZF1    | greenyellow |
| ILMN_2405684 | BIRC3    | greenyellow |
| ILMN_2259633 | MLL5     | greenyellow |
| ILMN_1795719 | RPA1     | greenyellow |
| ILMN_2191929 | FAM206A  | greenyellow |
| ILMN_2106380 | TNFSF15  | greenyellow |
| ILMN_1691930 | CBX6     | greenyellow |
| ILMN_2214997 | LRRFIP1  | greenyellow |
| ILMN_1671661 | HSD17B7  | greenyellow |
| ILMN_1736008 | YRDC     | greenyellow |
| ILMN_1693668 | WAPAL    | greenyellow |
| ILMN_1754553 | MED19    | greenyellow |
| ILMN_2368068 | TCF20    | greenyellow |
| ILMN_2227495 | ZNF549   | greenyellow |
| ILMN_2096322 | ADIPOR1  | greenyellow |
| ILMN_2097410 | DAPP1    | greenyellow |
| ILMN_1668134 | GSTM1    | greenyellow |
| ILMN_1747281 | EVI5L    | greenyellow |
| ILMN_1731043 | TRA2A    | greenyellow |
| ILMN_1657862 | AHCY     | greenyellow |
| ILMN_1701216 | BANP     | greenyellow |
| ILMN_1755883 | RPS27A   | greenyellow |
| ILMN_1811955 | PRMT5    | greenyellow |
| ILMN_2107004 | GPR1     | greenyellow |
| ILMN_1687971 | CAPN3    | greenyellow |
| ILMN_2117569 | DEM1     | greenyellow |

|              |           |             |
|--------------|-----------|-------------|
| ILMN_1685378 | RPS7P3    | greenyellow |
| ILMN_2075334 | HIST1H4C  | greenyellow |
| ILMN_2228196 | C6orf170  | greenyellow |
| ILMN_1862217 | APH1B     | greenyellow |
| ILMN_1692077 | MXRA7     | greenyellow |
| ILMN_2073307 | IL10      | greenyellow |
| ILMN_1797684 | PDCD2     | greenyellow |
| ILMN_1726308 | ST13P4    | greenyellow |
| ILMN_2407851 | IL17RD    | greenyellow |
| ILMN_1680109 | COL4A3BP  | greenyellow |
| ILMN_2150294 | FKBP14    | greenyellow |
| ILMN_1687941 | RNF4      | greenyellow |
| ILMN_2204909 | XRCC2     | greenyellow |
| ILMN_1794266 | SPINLW1   | greenyellow |
| ILMN_1687519 | SNAP23    | greenyellow |
| ILMN_2279367 | FCAR      | greenyellow |
| ILMN_1680111 | AHDC1     | greenyellow |
| ILMN_1662618 | SQSTM1    | greenyellow |
| ILMN_2190779 | PHAX      | greenyellow |
| ILMN_2348975 | NASP      | greenyellow |
| ILMN_1654915 | MLLT4     | greenyellow |
| ILMN_1788315 | SIN3B     | greenyellow |
| ILMN_1746314 | EVI5      | greenyellow |
| ILMN_1778360 | PYGB      | greenyellow |
| ILMN_1795325 | ACTG2     | greenyellow |
| ILMN_2113738 | MCMDC2    | greenyellow |
| ILMN_1761425 | OLFML2A   | greenyellow |
| ILMN_2210386 | TMEM17    | greenyellow |
| ILMN_1679867 | HSF1      | greenyellow |
| ILMN_2182482 | SHCBP1    | greenyellow |
| ILMN_2330495 | OCIAD1    | greenyellow |
| ILMN_1755733 | RPLP2     | greenyellow |
| ILMN_1712707 | ABHD8     | greenyellow |
| ILMN_1780236 | PMM1      | greenyellow |
| ILMN_2055760 | KIAA1715  | greenyellow |
| ILMN_1738678 | LINC00476 | greenyellow |
| ILMN_2371147 | BCL7C     | greenyellow |
| ILMN_1659888 | PPP1R14B  | greenyellow |
| ILMN_1773885 | DMAP1     | greenyellow |
| ILMN_1680279 | USP49     | greenyellow |
| ILMN_1684964 | ZNF212    | greenyellow |
| ILMN_2233050 | PLA2G2D   | greenyellow |
| ILMN_2415979 | C1orf222  | greenyellow |
| ILMN_2162367 | DMC1      | greenyellow |
| ILMN_2103547 | GOLGA8B   | greenyellow |

|              |            |             |
|--------------|------------|-------------|
| ILMN_1685854 | IGIP       | greenyellow |
| ILMN_2222101 | N4BP2      | greenyellow |
| ILMN_2261519 | AIRE       | greenyellow |
| ILMN_1695853 | CLK4       | greenyellow |
| ILMN_1813837 | C9orf9     | greenyellow |
| ILMN_1758087 | TAOK1      | greenyellow |
| ILMN_1760933 | PEX10      | greenyellow |
| ILMN_1778991 | NFIB       | greenyellow |
| ILMN_1726554 | IREB2      | greenyellow |
| ILMN_2051408 | PNPT1      | greenyellow |
| ILMN_1777721 | MAPRE1     | greenyellow |
| ILMN_1678032 | NR1H2      | greenyellow |
| ILMN_1751851 | CECR1      | greenyellow |
| ILMN_1655922 | PPP6R2     | greenyellow |
| ILMN_1708858 | CSNK1E     | greenyellow |
| ILMN_2110751 | CHRNA5     | greenyellow |
| ILMN_2397484 | GJC1       | greenyellow |
| ILMN_2151281 | GABARAPL1  | greenyellow |
| ILMN_2381537 | CRCP       | greenyellow |
| ILMN_1795639 | MGMT       | greenyellow |
| ILMN_1747223 | FRYL       | greenyellow |
| ILMN_2351241 | RNF14      | greenyellow |
| ILMN_1699082 | MAPKAPK5   | greenyellow |
| ILMN_2143822 | ZNF148     | greenyellow |
| ILMN_1670263 | CNST       | greenyellow |
| ILMN_2091707 | AGPHD1     | greenyellow |
| ILMN_2212823 | ZNF577     | greenyellow |
| ILMN_2075794 | NLRP8      | greenyellow |
| ILMN_2316974 | LILRB1     | greenyellow |
| ILMN_2321931 | DCLRE1C    | greenyellow |
| ILMN_2235785 | KCNH6      | greenyellow |
| ILMN_1661833 | ANKRD12    | greenyellow |
| ILMN_1776147 | C21orf59   | greenyellow |
| ILMN_1799815 | XYLT2      | greenyellow |
| ILMN_1657423 | SPG21      | greenyellow |
| ILMN_2047885 | PCDHB9     | greenyellow |
| ILMN_2130078 | CDKN2AIPNL | greenyellow |
| ILMN_1701621 | SCO2       | greenyellow |
| ILMN_1663092 | CITED2     | greenyellow |
| ILMN_1674551 | SMAD5      | greenyellow |
| ILMN_1791494 | SYNPO2     | greenyellow |
| ILMN_1692145 | ZNF14      | greenyellow |
| ILMN_2360028 | NFATC3     | grey        |
| ILMN_1807177 | FOCAD      | grey        |
| ILMN_1797046 | MTHFSD     | grey        |

|              |          |         |
|--------------|----------|---------|
| ILMN_2156786 | PGGT1B   | grey    |
| ILMN_2103388 | ZBTB49   | grey    |
| ILMN_1772459 | RPS23    | grey    |
| ILMN_2163306 | FAM120A  | grey    |
| ILMN_1740197 | ZNF234   | grey    |
| ILMN_1772540 | ATMIN    | grey    |
| ILMN_2358647 | FBXO21   | grey    |
| ILMN_1716480 | ACD      | grey    |
| ILMN_1737698 | RNF126P1 | grey    |
| ILMN_1906110 | RAB18    | grey    |
| ILMN_1738103 | COPE     | grey    |
| ILMN_1718265 | ATG5     | grey    |
| ILMN_1686135 | CEP95    | grey    |
| ILMN_1811261 | KRIT1    | grey    |
| ILMN_1715392 | PRPF3    | grey    |
| ILMN_2189406 | C15orf38 | grey    |
| ILMN_1739749 | B3GALT6  | grey    |
| ILMN_1778488 | WDR41    | grey    |
| ILMN_2258774 | MRPL43   | grey    |
| ILMN_1752895 | STX8     | grey    |
| ILMN_1688178 | RRP7A    | grey    |
| ILMN_1735735 | KATNB1   | grey    |
| ILMN_1661000 | RPS6KC1  | grey    |
| ILMN_2103295 | NSA2     | grey    |
| ILMN_1756793 | PAPD7    | grey    |
| ILMN_1700432 | ITPKB    | grey    |
| ILMN_1737857 | GTF2B    | grey    |
| ILMN_1654385 | ASB13    | grey    |
| ILMN_1805792 | TRIO     | grey    |
| ILMN_2050617 | CCT6P1   | grey    |
| ILMN_1805916 | NIPSNAP1 | grey    |
| ILMN_1754178 | GDI2     | grey    |
| ILMN_2171295 | CDK14    | grey    |
| ILMN_1801664 | POLR3K   | grey    |
| ILMN_1652163 | DVL2     | grey    |
| ILMN_2052163 | YIPF1    | magenta |
| ILMN_1683859 | SLC7A1   | magenta |
| ILMN_2375599 | RNH1     | magenta |
| ILMN_1725105 | EEF1E1   | magenta |
| ILMN_1685369 | SLU7     | magenta |
| ILMN_2127328 | PURA     | magenta |
| ILMN_1751378 | RARS     | magenta |
| ILMN_1752526 | RNF144B  | magenta |
| ILMN_1741171 | TM2D2    | magenta |
| ILMN_1758823 | SMARCB1  | magenta |

|              |           |         |
|--------------|-----------|---------|
| ILMN_1752837 | ARL8B     | magenta |
| ILMN_2227533 | ABHD14B   | magenta |
| ILMN_1651886 | CWF19L1   | magenta |
| ILMN_2241775 | TROVE2    | magenta |
| ILMN_1753498 | COASY     | magenta |
| ILMN_1792997 | NPTN      | magenta |
| ILMN_1712320 | DDX50     | magenta |
| ILMN_1680223 | PNPLA8    | magenta |
| ILMN_1723414 | HACL1     | magenta |
| ILMN_2099594 | SRP9      | magenta |
| ILMN_1688702 | PJA2      | magenta |
| ILMN_1739259 | UBE4A     | magenta |
| ILMN_2330243 | NUDT1     | magenta |
| ILMN_1745772 | ASCC3     | magenta |
| ILMN_1707901 | DHRS7B    | magenta |
| ILMN_1770339 | RPAIN     | magenta |
| ILMN_1738047 | FAM170B   | magenta |
| ILMN_1769517 | PRKDC     | magenta |
| ILMN_1796269 | CSRP3     | magenta |
| ILMN_1677697 | RPS26P35  | magenta |
| ILMN_1795679 | STMN2     | magenta |
| ILMN_2364272 | MBNL2     | magenta |
| ILMN_1691760 | FAM45A    | magenta |
| ILMN_1659285 | PSMG1     | magenta |
| ILMN_1712634 | TIA1      | magenta |
| ILMN_1680624 | CREG1     | magenta |
| ILMN_1676005 | KPNA1     | magenta |
| ILMN_1779228 | CDH2      | magenta |
| ILMN_1651769 | ZFYVE16   | magenta |
| ILMN_1903159 | PPM1A     | magenta |
| ILMN_2078334 | CNOT10    | magenta |
| ILMN_2053281 | C14orf149 | magenta |
| ILMN_1738346 | EFHA1     | magenta |
| ILMN_1748926 | TMEM209   | magenta |
| ILMN_1876266 | GJA3      | magenta |
| ILMN_1697585 | ACTR6     | magenta |
| ILMN_1735064 | PPP1R3E   | magenta |
| ILMN_1713006 | CDC34     | magenta |
| ILMN_1684834 | LBH       | magenta |
| ILMN_2228809 | YWHAG     | magenta |
| ILMN_1690138 | PHF10     | magenta |
| ILMN_1663132 | ADCK2     | magenta |
| ILMN_1690586 | HNRNPA1P4 | magenta |
| ILMN_2047206 | TMX3      | magenta |
| ILMN_1738420 | TMEM201   | magenta |

|              |          |         |
|--------------|----------|---------|
| ILMN_1658472 | APH1A    | magenta |
| ILMN_1704557 | RPS6KB1  | magenta |
| ILMN_1763404 | SRP9P1   | magenta |
| ILMN_1814526 | ADD3     | magenta |
| ILMN_1724544 | PPP4R1   | magenta |
| ILMN_1766657 | STOM     | magenta |
| ILMN_1799103 | SNRPB    | magenta |
| ILMN_1679800 | BRX1     | magenta |
| ILMN_1792078 | RNF114   | magenta |
| ILMN_1772798 | ARPP19   | magenta |
| ILMN_1762725 | EIF3L    | magenta |
| ILMN_1735151 | EIF5A2   | magenta |
| ILMN_2404085 | CLIP1    | magenta |
| ILMN_2380946 | EIF4G2   | magenta |
| ILMN_1782788 | CSDA     | magenta |
| ILMN_2391141 | UBE3A    | magenta |
| ILMN_1655068 | TOM1L2   | magenta |
| ILMN_1806804 | USP14    | magenta |
| ILMN_1700232 | FBXO30   | magenta |
| ILMN_2406313 | RBCK1    | magenta |
| ILMN_1665164 | CTR9     | magenta |
| ILMN_1727617 | XRN2     | magenta |
| ILMN_1737396 | PSMD14   | magenta |
| ILMN_2333594 | SUMO2    | magenta |
| ILMN_1685763 | WDR45L   | magenta |
| ILMN_1674282 | PPARD    | magenta |
| ILMN_1734198 | RNGTT    | magenta |
| ILMN_1710758 | RNF20    | magenta |
| ILMN_1694587 | EEF1B2   | magenta |
| ILMN_1747857 | SMARCE1  | magenta |
| ILMN_1761941 | FAM198B  | magenta |
| ILMN_1788223 | RSPH3    | magenta |
| ILMN_1697024 | STYX     | magenta |
| ILMN_1717154 | AQR      | magenta |
| ILMN_1713143 | MRPL3    | magenta |
| ILMN_2053567 | FASTKD2  | magenta |
| ILMN_1691425 | LDOC1L   | magenta |
| ILMN_1660844 | INTS4    | magenta |
| ILMN_1780937 | MUS81    | magenta |
| ILMN_1752281 | DNAJC13  | magenta |
| ILMN_1685258 | TMEM14B  | magenta |
| ILMN_2371825 | AGL      | magenta |
| ILMN_2123567 | SENP2    | magenta |
| ILMN_1826531 | ATXN7L3B | magenta |
| ILMN_1667883 | THOC5    | magenta |

|              |           |         |
|--------------|-----------|---------|
| ILMN_1749213 | SDF2L1    | magenta |
| ILMN_1656134 | CNOT7     | magenta |
| ILMN_1772821 | KIAA1671  | magenta |
| ILMN_1660585 | C15orf40  | magenta |
| ILMN_2054442 | ZNF146    | magenta |
| ILMN_2354381 | PON2      | magenta |
| ILMN_1811367 | MAT2B     | magenta |
| ILMN_1715680 | NEIL2     | magenta |
| ILMN_2337941 | COPS8     | magenta |
| ILMN_1711361 | ZNF319    | magenta |
| ILMN_2073235 | FTH1P12   | magenta |
| ILMN_1776352 | MUTED     | magenta |
| ILMN_2354547 | TUSC3     | magenta |
| ILMN_1737426 | PCMTD1    | magenta |
| ILMN_1696708 | C14orf166 | magenta |
| ILMN_1728684 | PELP1     | magenta |
| ILMN_1713322 | CCZ1B     | magenta |
| ILMN_1683811 | TNPO3     | magenta |
| ILMN_2246894 | EDF1      | magenta |
| ILMN_1701111 | GPCPD1    | magenta |
| ILMN_2373515 | HSP90AA1  | magenta |
| ILMN_2094106 | HSD17B12  | magenta |
| ILMN_1672287 | MYNN      | magenta |
| ILMN_1799744 | GALC      | magenta |
| ILMN_1777660 | RNF144A   | magenta |
| ILMN_1710482 | APLP2     | magenta |
| ILMN_1780302 | DYNC1H1   | magenta |
| ILMN_1787762 | HEATR1    | magenta |
| ILMN_2387553 | PSMA3     | magenta |
| ILMN_1674050 | COL8A2    | magenta |
| ILMN_1815707 | CALML4    | magenta |
| ILMN_1734826 | NUP88     | magenta |
| ILMN_1680193 | PAXIP1    | magenta |
| ILMN_1679555 | TIMM23    | magenta |
| ILMN_2189859 | TMEM192   | magenta |
| ILMN_2393994 | CSPP1     | magenta |
| ILMN_2357272 | BCLAF1    | magenta |
| ILMN_2063586 | CLIC4     | magenta |
| ILMN_1761120 | TM2D3     | magenta |
| ILMN_1814859 | DDX47     | magenta |
| ILMN_1714397 | CRYL1     | magenta |
| ILMN_2352121 | NT5C3     | magenta |
| ILMN_1751051 | C7orf25   | magenta |
| ILMN_1691570 | METTL5    | magenta |
| ILMN_2162328 | PTS       | magenta |

|              |          |         |
|--------------|----------|---------|
| ILMN_1736585 | TMED10   | magenta |
| ILMN_1790410 | DROSHA   | magenta |
| ILMN_1749752 | GAR1     | magenta |
| ILMN_2081988 | LANCL1   | magenta |
| ILMN_1716895 | RPA3     | magenta |
| ILMN_1859946 | UHMK1    | magenta |
| ILMN_1656482 | OSBPL2   | magenta |
| ILMN_1724718 | NCK2     | magenta |
| ILMN_2106902 | FOXN3    | magenta |
| ILMN_1756311 | UFSP2    | magenta |
| ILMN_2313730 | RHOC     | magenta |
| ILMN_1657968 | MAP2K2   | magenta |
| ILMN_1659415 | LAMTOR3  | magenta |
| ILMN_1690352 | ADO      | magenta |
| ILMN_2191681 | CHCHD2   | magenta |
| ILMN_2090558 | MMADHC   | magenta |
| ILMN_1765204 | ST13     | magenta |
| ILMN_2374164 | HERPUD1  | magenta |
| ILMN_1659027 | SLC2A1   | magenta |
| ILMN_1729033 | RPL9     | magenta |
| ILMN_1768282 | SNX21    | magenta |
| ILMN_1693310 | ITFG1    | magenta |
| ILMN_2339202 | KTN1     | magenta |
| ILMN_1675848 | MYL12A   | magenta |
| ILMN_1812976 | DDX54    | magenta |
| ILMN_2162234 | NEK1     | magenta |
| ILMN_1805474 | C1orf131 | magenta |
| ILMN_1803302 | CRK      | magenta |
| ILMN_1810514 | SLC25A44 | magenta |
| ILMN_1751692 | ZNF17    | magenta |
| ILMN_1718303 | PVRL2    | magenta |
| ILMN_1667857 | C12orf52 | magenta |
| ILMN_2054233 | SENP6    | magenta |
| ILMN_2146372 | KCTD6    | magenta |
| ILMN_1683146 | FTH1     | magenta |
| ILMN_1736888 | SAR1B    | magenta |
| ILMN_1652434 | MTHFD2L  | magenta |
| ILMN_1745423 | UTP3     | magenta |
| ILMN_1719864 | PACS2    | magenta |
| ILMN_1756162 | EXOSC8   | magenta |
| ILMN_1703140 | NEDD4    | magenta |
| ILMN_1786444 | LPL      | magenta |
| ILMN_1802157 | THOC1    | magenta |
| ILMN_1697906 | WBP4     | magenta |
| ILMN_2087528 | CPSF3    | magenta |

|              |          |         |
|--------------|----------|---------|
| ILMN_1713402 | FAM160A2 | magenta |
| ILMN_1797332 | NARS2    | magenta |
| ILMN_1718565 | CDKN1C   | magenta |
| ILMN_1753440 | DCAF16   | magenta |
| ILMN_2124816 | ZNF34    | magenta |
| ILMN_1723212 | SRSF3    | magenta |
| ILMN_1743662 | KBTBD3   | magenta |
| ILMN_1697286 | SF3A1    | magenta |
| ILMN_1745497 | C12orf26 | magenta |
| ILMN_1814113 | ZFR      | magenta |
| ILMN_1667839 | UBR7     | magenta |
| ILMN_1749109 | PSAP     | magenta |
| ILMN_2082810 | BRD7     | magenta |
| ILMN_1771620 | SNRPB2   | magenta |
| ILMN_1654516 | TMEM120A | magenta |
| ILMN_1715991 | SDPR     | magenta |
| ILMN_1784523 | ATP6V1G1 | magenta |
| ILMN_1716272 | KBTBD8   | magenta |
| ILMN_1805996 | SIN3A    | magenta |
| ILMN_1713454 | ZNF671   | magenta |
| ILMN_1756104 | LARP7    | magenta |
| ILMN_1711792 | GPBP1    | magenta |
| ILMN_1790650 | FOPNL    | magenta |
| ILMN_2186482 | TMED7    | magenta |
| ILMN_1764323 | METTL23  | magenta |
| ILMN_1651964 | ABCC5    | magenta |
| ILMN_2089329 | SPRY2    | magenta |
| ILMN_2332105 | WRNIP1   | magenta |
| ILMN_1801403 | DCUN1D4  | magenta |
| ILMN_2062381 | LCOR     | magenta |
| ILMN_1703949 | KPNB1    | magenta |
| ILMN_1660193 | ZNF529   | magenta |
| ILMN_1767747 | HDAC2    | magenta |
| ILMN_1673936 | KHSRP    | magenta |
| ILMN_1777113 | NEURL2   | magenta |
| ILMN_2373982 | PICK1    | magenta |
| ILMN_1715569 | CCDC53   | magenta |
| ILMN_1687858 | CALM2    | magenta |
| ILMN_1689059 | ZNF329   | magenta |
| ILMN_1723141 | OTUD1    | magenta |
| ILMN_1815656 | SERINC3  | magenta |
| ILMN_2229242 | LSM3     | magenta |
| ILMN_1701514 | TRAF3IP2 | magenta |
| ILMN_1769720 | STAU2    | magenta |
| ILMN_2187727 | NOC3L    | magenta |

|              |           |              |
|--------------|-----------|--------------|
| ILMN_1752283 | ITCH      | magenta      |
| ILMN_1773576 | CPNE3     | magenta      |
| ILMN_1706413 | RRNAD1    | magenta      |
| ILMN_1752968 | LAMB2     | magenta      |
| ILMN_1788184 | CIDEA     | midnightblue |
| ILMN_1773395 | RDH5      | midnightblue |
| ILMN_1667034 | PDPR      | midnightblue |
| ILMN_1657708 | MGLL      | midnightblue |
| ILMN_1750029 | GABPA     | midnightblue |
| ILMN_1720373 | SLC7A5    | midnightblue |
| ILMN_2127477 | G6PC3     | midnightblue |
| ILMN_1714567 | AHNAK     | midnightblue |
| ILMN_2174437 | CIDEC     | midnightblue |
| ILMN_1800225 | PPARG     | midnightblue |
| ILMN_1801443 | TSKU      | midnightblue |
| ILMN_1671731 | AVPI1     | midnightblue |
| ILMN_1684585 | ACSL1     | midnightblue |
| ILMN_2084353 | M6PR      | midnightblue |
| ILMN_1663399 | TIMP4     | midnightblue |
| ILMN_1787923 | PNPLA2    | midnightblue |
| ILMN_1777190 | CFD       | midnightblue |
| ILMN_1703142 | MARCH2    | midnightblue |
| ILMN_2186061 | PFKFB3    | midnightblue |
| ILMN_1729115 | UBE2SP1   | midnightblue |
| ILMN_1698554 | AACS      | midnightblue |
| ILMN_1698478 | SNAPC2    | midnightblue |
| ILMN_1672605 | C7orf41   | midnightblue |
| ILMN_1793384 | JAK1      | midnightblue |
| ILMN_1652754 | ZNF428    | midnightblue |
| ILMN_1795905 | ZBTB4     | midnightblue |
| ILMN_1689329 | SCD       | midnightblue |
| ILMN_1714167 | CYB5A     | midnightblue |
| ILMN_2331636 | ACACA     | midnightblue |
| ILMN_1763852 | ACACB     | midnightblue |
| ILMN_1713756 | GLUD1     | midnightblue |
| ILMN_1667711 | PLA2G16   | midnightblue |
| ILMN_1730032 | BOK       | midnightblue |
| ILMN_1699265 | TNFRSF10B | midnightblue |
| ILMN_2318811 | RANBP3    | midnightblue |
| ILMN_1666609 | USP22     | midnightblue |
| ILMN_1762835 | HELZ      | midnightblue |
| ILMN_1658759 | PEX19     | midnightblue |
| ILMN_1852022 | PLIN4     | midnightblue |
| ILMN_2352023 | DSTYK     | midnightblue |
| ILMN_1794165 | PGD       | midnightblue |

|              |          |              |
|--------------|----------|--------------|
| ILMN_1764166 | BCKDHB   | midnightblue |
| ILMN_1784287 | TGFBR3   | midnightblue |
| ILMN_1799106 | MARC1    | midnightblue |
| ILMN_1732176 | AGPAT2   | midnightblue |
| ILMN_1753931 | CDO1     | midnightblue |
| ILMN_1758213 | GPAM     | midnightblue |
| ILMN_1685855 | UBN2     | midnightblue |
| ILMN_1781536 | FAH      | midnightblue |
| ILMN_1659952 | MTMR2    | midnightblue |
| ILMN_1714197 | ACSS2    | midnightblue |
| ILMN_1655469 | TSPAN3   | midnightblue |
| ILMN_1728626 | WDR5     | midnightblue |
| ILMN_1683120 | UNG      | midnightblue |
| ILMN_1655654 | MPDU1    | midnightblue |
| ILMN_2355168 | MGST1    | midnightblue |
| ILMN_1795400 | TBCD     | midnightblue |
| ILMN_2131381 | PDE3B    | midnightblue |
| ILMN_1684158 | GPT2     | midnightblue |
| ILMN_1784871 | FASN     | midnightblue |
| ILMN_2412336 | AKR1C2   | midnightblue |
| ILMN_1740169 | TYRO3    | midnightblue |
| ILMN_1691846 | G0S2     | midnightblue |
| ILMN_1814120 | PECR     | midnightblue |
| ILMN_2091347 | IDH1     | midnightblue |
| ILMN_1792669 | HLCS     | midnightblue |
| ILMN_2410523 | DDR2     | midnightblue |
| ILMN_1766024 | PDCD10   | midnightblue |
| ILMN_2089073 | ATP9A    | midnightblue |
| ILMN_1802894 | VKORC1L1 | midnightblue |
| ILMN_1668065 | ELMOD3   | midnightblue |
| ILMN_1809456 | CNTRF    | midnightblue |
| ILMN_1792972 | ZNF439   | midnightblue |
| ILMN_1802167 | ALDH1L1  | midnightblue |
| ILMN_1744725 | BTBD6    | midnightblue |
| ILMN_1813671 | SLC25A1  | midnightblue |
| ILMN_1699357 | SLC22A5  | midnightblue |
| ILMN_1679382 | CCT2     | midnightblue |
| ILMN_1780170 | APOD     | midnightblue |
| ILMN_1659411 | POLR2C   | midnightblue |
| ILMN_2277099 | YWHAB    | midnightblue |
| ILMN_2289093 | RNF213   | midnightblue |
| ILMN_2114422 | NOD1     | midnightblue |
| ILMN_1791728 | SLC25A25 | pink         |
| ILMN_2317581 | SHANK3   | pink         |
| ILMN_1705210 | GRASP    | pink         |

|              |          |      |
|--------------|----------|------|
| ILMN_1741684 | SMPD1    | pink |
| ILMN_1658494 | RGCC     | pink |
| ILMN_2197519 | ZNF627   | pink |
| ILMN_1707484 | GEMIN6   | pink |
| ILMN_1794230 | SCAND1   | pink |
| ILMN_1734205 | RASSF1   | pink |
| ILMN_1775734 | SH2D3C   | pink |
| ILMN_2384056 | GPER     | pink |
| ILMN_1760347 | SRGN     | pink |
| ILMN_2187487 | HEATR5B  | pink |
| ILMN_1787567 | TSC22D1  | pink |
| ILMN_2094776 | CCNL1    | pink |
| ILMN_2356654 | LGALS8   | pink |
| ILMN_1664861 | ID1      | pink |
| ILMN_2199947 | REV3L    | pink |
| ILMN_1678493 | CHN1     | pink |
| ILMN_1803988 | MCL1     | pink |
| ILMN_1810214 | JUND     | pink |
| ILMN_1692865 | VPS37D   | pink |
| ILMN_1757467 | H1FO     | pink |
| ILMN_1806809 | ZNF189   | pink |
| ILMN_1786823 | ICAM2    | pink |
| ILMN_2053103 | SLC40A1  | pink |
| ILMN_1803367 | MECOM    | pink |
| ILMN_1718712 | FAM217B  | pink |
| ILMN_1776213 | RGMB     | pink |
| ILMN_1801307 | TNFSF10  | pink |
| ILMN_1762899 | EGR1     | pink |
| ILMN_1746408 | MIDN     | pink |
| ILMN_1745256 | CXXC5    | pink |
| ILMN_1758719 | NEDD9    | pink |
| ILMN_1770085 | BTG2     | pink |
| ILMN_1772522 | ZFP161   | pink |
| ILMN_1804642 | SMUG1    | pink |
| ILMN_1744268 | PLEC     | pink |
| ILMN_1745223 | CDC42EP4 | pink |
| ILMN_1724480 | AXIN2    | pink |
| ILMN_1677098 | YPEL2    | pink |
| ILMN_1687351 | ANKRA2   | pink |
| ILMN_1747305 | GIMAP8   | pink |
| ILMN_1806713 | ZNF18    | pink |
| ILMN_1657145 | MEOX1    | pink |
| ILMN_2305407 | ZBTB16   | pink |
| ILMN_2347068 | MKNK2    | pink |
| ILMN_1690610 | RALY     | pink |

|              |           |      |
|--------------|-----------|------|
| ILMN_2148668 | RCBTB2    | pink |
| ILMN_1788955 | PDLIM1    | pink |
| ILMN_1760245 | TMEM42    | pink |
| ILMN_2053415 | LDLR      | pink |
| ILMN_1684755 | KAZALD1   | pink |
| ILMN_1701789 | IFIT3     | pink |
| ILMN_1880280 | FOXP1-IT1 | pink |
| ILMN_2394498 | SYF2      | pink |
| ILMN_1789364 | ZNF789    | pink |
| ILMN_1689318 | NUAK1     | pink |
| ILMN_2131861 | SOCS2     | pink |
| ILMN_1723522 | APOLD1    | pink |
| ILMN_1776121 | C2orf55   | pink |
| ILMN_1772527 | C12orf44  | pink |
| ILMN_1745034 | SLC11A2   | pink |
| ILMN_2054297 | PTGS2     | pink |
| ILMN_1832208 | TMEM33    | pink |
| ILMN_1771385 | GBP4      | pink |
| ILMN_1756862 | APOL3     | pink |
| ILMN_1733851 | DACT3     | pink |
| ILMN_2107184 | SNRK      | pink |
| ILMN_2173611 | MT1E      | pink |
| ILMN_1651347 | SERTAD2   | pink |
| ILMN_1728934 | PRC1      | pink |
| ILMN_1811775 | CCDC124   | pink |
| ILMN_1786843 | KCTD13    | pink |
| ILMN_1672571 | TFIP11    | pink |
| ILMN_2374244 | DYRK2     | pink |
| ILMN_1752199 | LHPP      | pink |
| ILMN_1665559 | CDK2      | pink |
| ILMN_1763641 | ZNF614    | pink |
| ILMN_1740490 | ZFP82     | pink |
| ILMN_1708041 | PLEKHF1   | pink |
| ILMN_1775224 | NOS3      | pink |
| ILMN_2340259 | PDE4B     | pink |
| ILMN_2152429 | C12orf76  | pink |
| ILMN_1728230 | ZNF30     | pink |
| ILMN_2364852 | BTN2A1    | pink |
| ILMN_1683133 | KLF15     | pink |
| ILMN_1739428 | IFIT2     | pink |
| ILMN_1778444 | FKBP5     | pink |
| ILMN_1768534 | BHLHE40   | pink |
| ILMN_1771326 | C15orf44  | pink |
| ILMN_1758164 | STC1      | pink |
| ILMN_1805192 | ITPRIP    | pink |

|              |              |      |
|--------------|--------------|------|
| ILMN_1677402 | C11orf96     | pink |
| ILMN_1740426 | RASD1        | pink |
| ILMN_1688318 | FRG1B        | pink |
| ILMN_2137789 | KLF4         | pink |
| ILMN_1720829 | ZFP36        | pink |
| ILMN_1712636 | NVL          | pink |
| ILMN_1763524 | LZTS2        | pink |
| ILMN_1715508 | NNMT         | pink |
| ILMN_1751904 | EDNRB        | pink |
| ILMN_1736847 | MED8         | pink |
| ILMN_1720926 | PSMD5        | pink |
| ILMN_1695316 | SLC39A8      | pink |
| ILMN_1815023 | PIM1         | pink |
| ILMN_1798957 | MAPKAPK5-AS1 | pink |
| ILMN_1776678 | GIMAP7       | pink |
| ILMN_1783023 | C5orf51      | pink |
| ILMN_1661599 | DDIT4        | pink |
| ILMN_1791232 | SPRED2       | pink |
| ILMN_1683792 | LAP3         | pink |
| ILMN_1700183 | APLNR        | pink |
| ILMN_1765332 | TIMM10       | pink |
| ILMN_1684982 | PDK4         | pink |
| ILMN_2346649 | ZNF473       | pink |
| ILMN_1778523 | KLF9         | pink |
| ILMN_1683595 | MBD1         | pink |
| ILMN_1753627 | DOLK         | pink |
| ILMN_2197365 | RGS2         | pink |
| ILMN_1802205 | RHOB         | pink |
| ILMN_1679727 | CLK1         | pink |
| ILMN_2262444 | PDE7A        | pink |
| ILMN_1812795 | RUNX1T1      | pink |
| ILMN_1671092 | SOX17        | pink |
| ILMN_1772786 | KIF16B       | pink |
| ILMN_1728785 | GPR116       | pink |
| ILMN_1705093 | ORC5         | pink |
| ILMN_1658847 | NRARP        | pink |
| ILMN_1758906 | GNA13        | pink |
| ILMN_1654065 | ATOH8        | pink |
| ILMN_1735930 | KLF2         | pink |
| ILMN_2188264 | CYR61        | pink |
| ILMN_1723481 | CHST3        | pink |
| ILMN_1729217 | FAM131A      | pink |
| ILMN_1815924 | NUP107       | pink |
| ILMN_1664010 | ELF1         | pink |
| ILMN_2110167 | POLR1E       | pink |

|              |          |      |
|--------------|----------|------|
| ILMN_2395204 | SLTM     | pink |
| ILMN_1756573 | NDUFA4L2 | pink |
| ILMN_2198515 | ARRDC3   | pink |
| ILMN_1668283 | HYAL2    | pink |
| ILMN_1698259 | TMEM100  | pink |
| ILMN_1690454 | FAM212A  | pink |
| ILMN_1743352 | TBCC     | pink |
| ILMN_1699574 | NRP1     | pink |
| ILMN_1716728 | SAYSD1   | pink |
| ILMN_1784602 | CDKN1A   | pink |
| ILMN_1669523 | FOS      | pink |
| ILMN_1773154 | NFKBIA   | pink |
| ILMN_1796835 | RWDD3    | pink |
| ILMN_1794017 | SERTAD1  | pink |
| ILMN_1679771 | C2orf68  | pink |
| ILMN_1711450 | TH1L     | pink |
| ILMN_1702487 | SGK1     | pink |
| ILMN_1656300 | GFRA2    | pink |
| ILMN_1798706 | GPR183   | pink |
| ILMN_1791884 | SNHG11   | pink |
| ILMN_1727200 | SLCO4A1  | pink |
| ILMN_1678919 | YOD1     | pink |
| ILMN_2117323 | PIK3C2B  | pink |
| ILMN_2064902 | HAND2    | pink |
| ILMN_1719236 | CDH5     | pink |
| ILMN_2374865 | ATF3     | pink |
| ILMN_1746888 | PCOLCE2  | pink |
| ILMN_1803811 | TRIB1    | pink |
| ILMN_1757627 | ZMYND19  | pink |
| ILMN_2098418 | GATSL3   | pink |
| ILMN_1748473 | GIMAP4   | pink |
| ILMN_2352097 | GPR56    | pink |
| ILMN_1754489 | FBXL20   | pink |
| ILMN_1707339 | BTG3     | pink |
| ILMN_1741054 | SLC5A6   | pink |
| ILMN_2169966 | TM4SF18  | pink |
| ILMN_1694539 | MAP3K6   | pink |
| ILMN_1736176 | PLK1     | pink |
| ILMN_1728197 | CLDN5    | pink |
| ILMN_1811426 | TMTC1    | pink |
| ILMN_1687316 | NCDN     | pink |
| ILMN_1656057 | PLAU     | pink |
| ILMN_1752622 | PROX1    | pink |
| ILMN_1792384 | HABP4    | pink |
| ILMN_1813669 | ANKS1A   | pink |

|              |          |      |
|--------------|----------|------|
| ILMN_1743445 | FAM107A  | pink |
| ILMN_1680618 | MYC      | pink |
| ILMN_1782050 | CEBPD    | pink |
| ILMN_1652237 | CBR3     | pink |
| ILMN_1724863 | TICAM1   | pink |
| ILMN_1656369 | C8orf4   | pink |
| ILMN_1707631 | MED10    | pink |
| ILMN_1724609 | SLC2A8   | pink |
| ILMN_1739840 | LRRC8A   | pink |
| ILMN_1793360 | APITD1   | pink |
| ILMN_1700081 | FST      | pink |
| ILMN_1688953 | ARHGAP19 | pink |
| ILMN_1715674 | ITPK1    | pink |
| ILMN_2083469 | IRS2     | pink |
| ILMN_1677385 | C8orf40  | pink |
| ILMN_1691156 | MT1A     | pink |
| ILMN_1681703 | FOXO3    | pink |
| ILMN_2413650 | STIL     | pink |
| ILMN_1671263 | CACNA1H  | pink |
| ILMN_2380688 | B4GALT4  | pink |
| ILMN_1658677 | DTX3     | pink |
| ILMN_1699275 | VWDE     | pink |
| ILMN_1692754 | VMP1     | pink |
| ILMN_1789243 | VPS33B   | pink |
| ILMN_1756049 | NT5DC3   | pink |
| ILMN_2329429 | GIMAP6   | pink |
| ILMN_1776631 | KRBA1    | pink |
| ILMN_1716821 | GORASP1  | pink |
| ILMN_1782305 | NR4A2    | pink |
| ILMN_1658080 | ZNF573   | pink |
| ILMN_1762531 | FGF9     | pink |
| ILMN_1806023 | JUN      | pink |
| ILMN_1723123 | FGFR3    | pink |
| ILMN_1885165 | GTF3C4   | pink |
| ILMN_2183938 | LEMD3    | pink |
| ILMN_1752899 | BCL11A   | pink |
| ILMN_2348268 | IFFO1    | pink |
| ILMN_2405521 | MTHFD2   | pink |
| ILMN_1795228 | ZFAND5   | pink |
| ILMN_1797318 | HSPA14   | pink |
| ILMN_1765578 | TIPARP   | pink |
| ILMN_1797744 | TPPP3    | pink |
| ILMN_1701134 | PTEN     | pink |
| ILMN_1781285 | DUSP1    | pink |
| ILMN_1755657 | RASIP1   | pink |

|              |          |        |
|--------------|----------|--------|
| ILMN_1673566 | ADAMTS1  | pink   |
| ILMN_1771870 | FAM98C   | pink   |
| ILMN_2366790 | DDX52    | pink   |
| ILMN_2224833 | ADIPOR2  | pink   |
| ILMN_1738819 | EFTUD2   | pink   |
| ILMN_1740010 | PCNX     | pink   |
| ILMN_1714170 | SPSB1    | pink   |
| ILMN_1682368 | LRWD1    | pink   |
| ILMN_1665510 | ERRFI1   | pink   |
| ILMN_1737298 | MAT2A    | pink   |
| ILMN_1736015 | PHF17    | pink   |
| ILMN_1671265 | ING2     | pink   |
| ILMN_1711157 | NOTCH4   | pink   |
| ILMN_1762764 | SH3BGRL2 | pink   |
| ILMN_1892403 | SNORD13  | pink   |
| ILMN_2098616 | ANXA2R   | pink   |
| ILMN_1691864 | SEPT10   | pink   |
| ILMN_2210581 | B3GAT3   | pink   |
| ILMN_2086077 | JUNB     | pink   |
| ILMN_1703123 | CSRNP1   | pink   |
| ILMN_1695246 | KLHDC8B  | pink   |
| ILMN_1695590 | ADRB2    | pink   |
| ILMN_2382127 | PPFIA1   | pink   |
| ILMN_1813650 | INPP5F   | pink   |
| ILMN_1698995 | DES      | purple |
| ILMN_1709153 | PRR16    | purple |
| ILMN_1912737 | HIPK2    | purple |
| ILMN_1700144 | ITGA10   | purple |
| ILMN_1771697 | VRK3     | purple |
| ILMN_1772455 | HDAC3    | purple |
| ILMN_1743635 | ALG14    | purple |
| ILMN_1788538 | NCALD    | purple |
| ILMN_2064917 | AGGF1    | purple |
| ILMN_1705922 | BAIAP2   | purple |
| ILMN_1693270 | SUSD2    | purple |
| ILMN_2312587 | NRAP     | purple |
| ILMN_1847822 | KIAA0368 | purple |
| ILMN_1689800 | MRTO4    | purple |
| ILMN_1707077 | SORT1    | purple |
| ILMN_1659430 | PDE4DIP  | purple |
| ILMN_1774990 | C16orf13 | purple |
| ILMN_1680344 | MYOM1    | purple |
| ILMN_1704672 | NABP2    | purple |
| ILMN_1783120 | SLMAP    | purple |
| ILMN_1802557 | HEBP1    | purple |

|              |          |        |
|--------------|----------|--------|
| ILMN_1812616 | MYO1C    | purple |
| ILMN_1675927 | NEBL     | purple |
| ILMN_1754195 | RPL31    | purple |
| ILMN_1720850 | BAZ2B    | purple |
| ILMN_2337974 | PKIA     | purple |
| ILMN_2393497 | ATXN3    | purple |
| ILMN_1802799 | AKIRIN1  | purple |
| ILMN_1723158 | NOP2     | purple |
| ILMN_1729495 | TRIM41   | purple |
| ILMN_2182750 | DDX1     | purple |
| ILMN_2323087 | RBPMS    | purple |
| ILMN_1735220 | CAV2     | purple |
| ILMN_1685365 | ZNF773   | purple |
| ILMN_2396956 | AKAP13   | purple |
| ILMN_1654422 | ACTN2    | purple |
| ILMN_1765409 | STAM     | purple |
| ILMN_1726659 | THOP1    | purple |
| ILMN_2065273 | NPY6R    | purple |
| ILMN_1783598 | CAB39L   | purple |
| ILMN_1802160 | XIRP1    | purple |
| ILMN_1720755 | C10orf71 | purple |
| ILMN_1738482 | HAUS2    | purple |
| ILMN_1813386 | CORO6    | purple |
| ILMN_1746704 | TRIM8    | purple |
| ILMN_2051519 | RPL37A   | purple |
| ILMN_1699440 | ZBTB47   | purple |
| ILMN_1807540 | MICU1    | purple |
| ILMN_1813544 | OXCT1    | purple |
| ILMN_1745655 | PEX16    | purple |
| ILMN_1677962 | GPHN     | purple |
| ILMN_2366041 | ITM2C    | purple |
| ILMN_1780060 | FCN3     | purple |
| ILMN_1793770 | DNAJB6   | purple |
| ILMN_1709728 | SLC30A5  | purple |
| ILMN_1697448 | TXNIP    | purple |
| ILMN_1682572 | KIAA0528 | purple |
| ILMN_1664577 | DLD      | purple |
| ILMN_1728083 | EIF4EBP2 | purple |
| ILMN_2339825 | YME1L1   | purple |
| ILMN_1812559 | SLC7A6   | purple |
| ILMN_1745119 | MPLKIP   | purple |
| ILMN_1728047 | AKR1A1   | purple |
| ILMN_1726783 | RNASEH1  | purple |
| ILMN_2067656 | CCND2    | purple |
| ILMN_1738773 | HRC      | purple |

|              |            |        |
|--------------|------------|--------|
| ILMN_1769091 | PRCP       | purple |
| ILMN_1742569 | MTPAP      | purple |
| ILMN_1793832 | GRB14      | purple |
| ILMN_2353697 | HINFP      | purple |
| ILMN_2333766 | PIIP5K1    | purple |
| ILMN_1744239 | FEM1B      | purple |
| ILMN_1756501 | ST6GAL1    | purple |
| ILMN_1760628 | C9orf86    | purple |
| ILMN_1669703 | TNK2       | purple |
| ILMN_2052335 | MYOC       | purple |
| ILMN_1713688 | DHX32      | purple |
| ILMN_1808789 | MYO5C      | purple |
| ILMN_1711853 | MED24      | purple |
| ILMN_1760335 | ADPRHL1    | purple |
| ILMN_1780756 | RBM23      | purple |
| ILMN_2368617 | FKRP       | purple |
| ILMN_1768117 | RBM25      | purple |
| ILMN_1708064 | MAP4       | purple |
| ILMN_2392274 | CD82       | purple |
| ILMN_1655867 | HRASLS     | purple |
| ILMN_2412807 | DCTN1      | purple |
| ILMN_1655191 | CASZ1      | purple |
| ILMN_1736757 | GNPTAB     | purple |
| ILMN_2076640 | KHDRBS1    | purple |
| ILMN_1785424 | ABLIM1     | purple |
| ILMN_1733415 | MFAP5      | purple |
| ILMN_2381064 | TPD52      | purple |
| ILMN_1707137 | C17orf97   | purple |
| ILMN_1669599 | DENND4C    | purple |
| ILMN_2058795 | CPQ        | purple |
| ILMN_1762103 | WDR48      | purple |
| ILMN_2100689 | MAP2K4     | purple |
| ILMN_1656420 | KIAA0664L3 | purple |
| ILMN_1715625 | C20orf94   | purple |
| ILMN_2199389 | VIPR1      | purple |
| ILMN_1788160 | KIF5B      | purple |
| ILMN_1789839 | GTF3C1     | purple |
| ILMN_1757415 | SELRC1     | purple |
| ILMN_1664756 | KPNA4      | purple |
| ILMN_1748206 | C20orf160  | purple |
| ILMN_1691436 | BLVRA      | purple |
| ILMN_1776297 | GOLGA4     | purple |
| ILMN_1693664 | POMGNT1    | purple |
| ILMN_2159384 | SBDSP1     | purple |
| ILMN_1673798 | PPOX       | purple |

|              |          |        |
|--------------|----------|--------|
| ILMN_1781691 | TRAK2    | purple |
| ILMN_1754121 | CSK      | purple |
| ILMN_1756877 | IFT43    | purple |
| ILMN_1773407 | C16orf72 | purple |
| ILMN_1747506 | DHX34    | purple |
| ILMN_1761242 | COMMD1   | purple |
| ILMN_1701596 | RPS20    | purple |
| ILMN_1674506 | MED23    | purple |
| ILMN_1690035 | FLYWCH1  | purple |
| ILMN_2177413 | TBL3     | purple |
| ILMN_2332553 | MSRB3    | purple |
| ILMN_1676946 | AP3M2    | purple |
| ILMN_1672843 | FBXO8    | purple |
| ILMN_1809323 | TMEM246  | purple |
| ILMN_1703412 | LATS2    | purple |
| ILMN_1757388 | OCEL1    | purple |
| ILMN_1775508 | CYLD     | purple |
| ILMN_2311779 | TMUB2    | purple |
| ILMN_1785191 | TMEM14A  | purple |
| ILMN_1679217 | FAM110B  | purple |
| ILMN_1659703 | WWP2     | purple |
| ILMN_1666502 | SOBP     | purple |
| ILMN_1857017 | SNX8     | purple |
| ILMN_1729180 | GATM     | purple |
| ILMN_1653200 | SLC22A17 | purple |
| ILMN_2341229 | CD34     | purple |
| ILMN_1738793 | ZNF71    | purple |
| ILMN_1706839 | TCERG1   | purple |
| ILMN_1700733 | FAM214A  | purple |
| ILMN_1764571 | ARHGAP23 | purple |
| ILMN_1706706 | DCAF7    | purple |
| ILMN_2113807 | MYL2     | purple |
| ILMN_1705865 | XIRP2    | purple |
| ILMN_1676998 | SCN2B    | purple |
| ILMN_1813635 | KIAA1429 | purple |
| ILMN_1718706 | ERAL1    | purple |
| ILMN_1765606 | YAF2     | purple |
| ILMN_1788363 | MLH1     | purple |
| ILMN_1764729 | JAG2     | purple |
| ILMN_2198878 | INPP4B   | purple |
| ILMN_1815158 | GPS2     | purple |
| ILMN_2129388 | FAM190B  | purple |
| ILMN_1657064 | C6orf70  | purple |
| ILMN_1666192 | DCTN5    | purple |
| ILMN_2401618 | MLX      | purple |

|              |           |        |
|--------------|-----------|--------|
| ILMN_1772489 | NEMF      | purple |
| ILMN_2205245 | GPN2      | purple |
| ILMN_1674620 | SGCE      | purple |
| ILMN_2373763 | CASP7     | purple |
| ILMN_1701933 | SNCA      | purple |
| ILMN_1696054 | SMYD1     | purple |
| ILMN_1678579 | CPT2      | purple |
| ILMN_1748844 | CNKSR3    | purple |
| ILMN_1677080 | IFT46     | purple |
| ILMN_1651385 | MFN2      | purple |
| ILMN_1696284 | CLDN18    | purple |
| ILMN_1711289 | GYS1      | purple |
| ILMN_1740572 | TCN2      | purple |
| ILMN_1869897 | NEK7      | purple |
| ILMN_1811468 | IRX3      | purple |
| ILMN_2076940 | MEAF6     | purple |
| ILMN_1704245 | MYO18B    | purple |
| ILMN_1706434 | CSDAP1    | purple |
| ILMN_2151075 | ZNF821    | purple |
| ILMN_1778964 | CLIC5     | purple |
| ILMN_1724207 | IVD       | purple |
| ILMN_1725300 | MLL3      | purple |
| ILMN_1731174 | RPSAP56   | purple |
| ILMN_1748578 | RAD21     | purple |
| ILMN_1768973 | HIST2H2AC | purple |
| ILMN_1682957 | PACSIN3   | purple |
| ILMN_1705900 | ATXN10    | purple |
| ILMN_1717855 | PFDN1     | purple |
| ILMN_1670037 | POLR2L    | purple |
| ILMN_1685928 | WDR34     | purple |
| ILMN_1804207 | MRPL4     | purple |
| ILMN_1784447 | PLCE1     | purple |
| ILMN_1807919 | TNS1      | purple |
| ILMN_1793894 | ANAPC13   | purple |
| ILMN_1683082 | RPUUSD1   | purple |
| ILMN_1736103 | ITPR2     | purple |
| ILMN_1687092 | KBTBD4    | purple |
| ILMN_1675055 | MUL1      | purple |
| ILMN_1661888 | MEF2A     | purple |
| ILMN_1760174 | MCCC1     | purple |
| ILMN_1773228 | DLST      | purple |
| ILMN_1779376 | GSK3B     | purple |
| ILMN_1685540 | SHROOM3   | purple |
| ILMN_1797522 | DUSP3     | purple |
| ILMN_1704342 | UBE3C     | purple |

|              |          |        |
|--------------|----------|--------|
| ILMN_1721651 | UBE2HP1  | purple |
| ILMN_1769546 | RIN2     | purple |
| ILMN_1722329 | CASQ2    | purple |
| ILMN_1754423 | C3orf23  | purple |
| ILMN_2228453 | CEP104   | purple |
| ILMN_1797933 | MRPL17   | purple |
| ILMN_1697529 | RNF10    | purple |
| ILMN_1653529 | TEX10    | purple |
| ILMN_1775175 | RPL3L    | purple |
| ILMN_1760718 | ZMIZ2    | purple |
| ILMN_1776038 | UBXN2A   | purple |
| ILMN_1743499 | POLDIP2  | purple |
| ILMN_2360229 | MAPKAP1  | purple |
| ILMN_1704253 | C6orf106 | purple |
| ILMN_1790508 | KCNA5    | purple |
| ILMN_1686668 | GFM2     | purple |
| ILMN_1756767 | EIF5B    | purple |
| ILMN_2305225 | NDRG4    | purple |
| ILMN_1708672 | ACAT2    | purple |
| ILMN_1683678 | SPATS2L  | purple |
| ILMN_1750718 | GIGYF2   | purple |
| ILMN_1736500 | GNB2L1   | purple |
| ILMN_1688098 | TBC1D4   | purple |
| ILMN_1744534 | LYRM5    | red    |
| ILMN_1755047 | LRRC2    | red    |
| ILMN_1662038 | LARGE    | red    |
| ILMN_1692844 | TBC1D19  | red    |
| ILMN_2286800 | DNM1L    | red    |
| ILMN_2356311 | FAM165B  | red    |
| ILMN_2381397 | HSPD1    | red    |
| ILMN_1803775 | HSPE1    | red    |
| ILMN_1692121 | USO1     | red    |
| ILMN_1784178 | IFT172   | red    |
| ILMN_2111739 | MAN2C1   | red    |
| ILMN_1765649 | IRF3     | red    |
| ILMN_1814465 | UBE2G1   | red    |
| ILMN_1717180 | MTMR6    | red    |
| ILMN_1781752 | CLEC16A  | red    |
| ILMN_1651554 | RGS5     | red    |
| ILMN_1750961 | TM6SF1   | red    |
| ILMN_1756417 | ANKRD37  | red    |
| ILMN_1658464 | GTF3A    | red    |
| ILMN_1804498 | BRAT1    | red    |
| ILMN_1724700 | RIOK3    | red    |
| ILMN_1708721 | RABGAP1L | red    |

|              |          |     |
|--------------|----------|-----|
| ILMN_1652409 | SPATA7   | red |
| ILMN_1743097 | XRCC6    | red |
| ILMN_1759460 | TAF7     | red |
| ILMN_1815366 | ENGASE   | red |
| ILMN_1693471 | KLHL35   | red |
| ILMN_1810785 | RNF11    | red |
| ILMN_1701293 | COX7A2   | red |
| ILMN_1677885 | FMO4     | red |
| ILMN_1812312 | NDUFS4   | red |
| ILMN_1893909 | IKZF2    | red |
| ILMN_1722186 | C2orf56  | red |
| ILMN_1789405 | C22orf25 | red |
| ILMN_1717234 | CAST     | red |
| ILMN_1805800 | RAB5A    | red |
| ILMN_1805590 | NAA38    | red |
| ILMN_1656427 | C17orf39 | red |
| ILMN_1745513 | MCAT     | red |
| ILMN_1783728 | TBRG4    | red |
| ILMN_1679816 | HSPB7    | red |
| ILMN_1797893 | N4BP2L2  | red |
| ILMN_1661595 | C1orf53  | red |
| ILMN_1678652 | TCTN3    | red |
| ILMN_1800912 | ZFP106   | red |
| ILMN_1690179 | CRYM     | red |
| ILMN_1748291 | C1orf55  | red |
| ILMN_1690911 | C16orf87 | red |
| ILMN_1796094 | CD36     | red |
| ILMN_2354269 | ZC2HC1C  | red |
| ILMN_1741264 | MRPS33   | red |
| ILMN_2149226 | CAV1     | red |
| ILMN_1790062 | FAM105B  | red |
| ILMN_2377174 | SYPL1    | red |
| ILMN_1678004 | TMEM41B  | red |
| ILMN_1670638 | PITPNC1  | red |
| ILMN_1758827 | RTN4IP1  | red |
| ILMN_1653618 | ZZZ3     | red |
| ILMN_1701375 | FBXW5    | red |
| ILMN_2133675 | SGSH     | red |
| ILMN_1723116 | AMFR     | red |
| ILMN_1757742 | ZRANB1   | red |
| ILMN_2119774 | CYP2R1   | red |
| ILMN_1695706 | H3F3B    | red |
| ILMN_1789809 | RPL13AP6 | red |
| ILMN_1685917 | EMCN     | red |
| ILMN_1749792 | SORBS1   | red |

|              |          |     |
|--------------|----------|-----|
| ILMN_1796417 | ASNS     | red |
| ILMN_2324157 | UBA3     | red |
| ILMN_1670817 | GRPEL1   | red |
| ILMN_1729775 | OPA1     | red |
| ILMN_1811624 | THADA    | red |
| ILMN_1797310 | ATP6V1D  | red |
| ILMN_1700042 | TLN2     | red |
| ILMN_1746012 | MBD6     | red |
| ILMN_2110532 | RPL26L1  | red |
| ILMN_1662617 | PPP2R3C  | red |
| ILMN_1764871 | PIGP     | red |
| ILMN_1670542 | AK2      | red |
| ILMN_2226324 | BRP44L   | red |
| ILMN_1668484 | LRRC47   | red |
| ILMN_1866887 | LMBRD2   | red |
| ILMN_2370365 | RFC4     | red |
| ILMN_1701461 | TIMP3    | red |
| ILMN_1681812 | HIF1AN   | red |
| ILMN_2352295 | PRDM10   | red |
| ILMN_1691117 | DNTTIP1  | red |
| ILMN_1685079 | TELO2    | red |
| ILMN_1800634 | NME4     | red |
| ILMN_1679929 | KLF13    | red |
| ILMN_1671207 | IARS2    | red |
| ILMN_2045729 | WDR12    | red |
| ILMN_1664167 | RPF2     | red |
| ILMN_1757384 | RAN      | red |
| ILMN_2341952 | MRPL35   | red |
| ILMN_2105308 | DPM1     | red |
| ILMN_1793743 | DIRC2    | red |
| ILMN_1768115 | TSPAN12  | red |
| ILMN_1727045 | RASGRP3  | red |
| ILMN_1776858 | DUS4L    | red |
| ILMN_2213297 | C11orf54 | red |
| ILMN_1810826 | NAA35    | red |
| ILMN_1758272 | MYPN     | red |
| ILMN_2130411 | KDELR1   | red |
| ILMN_1653432 | HNRPDL   | red |
| ILMN_1734380 | DPF3     | red |
| ILMN_1656293 | GOSR2    | red |
| ILMN_1793290 | WDR60    | red |
| ILMN_1688971 | NOL11    | red |
| ILMN_1655734 | RPF1     | red |
| ILMN_1713668 | TSNAX    | red |
| ILMN_2337923 | TPD52L1  | red |

|              |         |     |
|--------------|---------|-----|
| ILMN_1685022 | CAPN7   | red |
| ILMN_1741613 | SERINC1 | red |
| ILMN_1688464 | MAP6D1  | red |
| ILMN_2169439 | ITGAV   | red |
| ILMN_1767470 | SCPEP1  | red |
| ILMN_1799819 | MARS    | red |
| ILMN_1708782 | MFAP3   | red |
| ILMN_1677138 | POLR2J3 | red |
| ILMN_1731612 | UCHL5   | red |
| ILMN_1659725 | EXOSC5  | red |
| ILMN_2142117 | LYPLAL1 | red |
| ILMN_1758543 | CNIH    | red |
| ILMN_2166865 | ENY2    | red |
| ILMN_1781761 | ENPP4   | red |
| ILMN_2142554 | NENF    | red |
| ILMN_1715113 | HARS2   | red |
| ILMN_2173294 | THNSL2  | red |
| ILMN_1715705 | SSNA1   | red |
| ILMN_1663616 | DNAJC7  | red |
| ILMN_1787879 | ARL2    | red |
| ILMN_2375973 | ALKBH1  | red |
| ILMN_1717420 | UBE2W   | red |
| ILMN_1746206 | AZI1    | red |
| ILMN_1691276 | CXXC1   | red |
| ILMN_1882590 | NACC2   | red |
| ILMN_2358202 | SRRT    | red |
| ILMN_1670899 | FBN2    | red |
| ILMN_2078264 | C3orf38 | red |
| ILMN_1728975 | SCO1    | red |
| ILMN_1690464 | SLC35G1 | red |
| ILMN_1765044 | CUTC    | red |
| ILMN_1812262 | DDR1    | red |
| ILMN_1748650 | MRPL45  | red |
| ILMN_2316236 | HOPX    | red |
| ILMN_1734486 | TSEN15  | red |
| ILMN_1736796 | RB1CC1  | red |
| ILMN_1754220 | SF3A2   | red |
| ILMN_1795918 | AGAP3   | red |
| ILMN_1740466 | FAM46A  | red |
| ILMN_1672884 | MTFMT   | red |
| ILMN_1747020 | SGK3    | red |
| ILMN_1810628 | PRUNE2  | red |
| ILMN_2345319 | PREPL   | red |
| ILMN_1750160 | FASTKD3 | red |
| ILMN_1763704 | RGS11   | red |

|              |           |     |
|--------------|-----------|-----|
| ILMN_1779177 | U2AF1L4   | red |
| ILMN_1805827 | PPA1      | red |
| ILMN_1686610 | APBA3     | red |
| ILMN_1747241 | IWS1      | red |
| ILMN_1782897 | CAPRIN1   | red |
| ILMN_1795007 | C2orf47   | red |
| ILMN_1703477 | ARHGEF2   | red |
| ILMN_1789186 | OBFC1     | red |
| ILMN_1666546 | DUSP14    | red |
| ILMN_1658094 | ZNF365    | red |
| ILMN_1731194 | STRAP     | red |
| ILMN_1720996 | SLC12A2   | red |
| ILMN_1799128 | SLC30A9   | red |
| ILMN_1691927 | BTBD1     | red |
| ILMN_1732071 | HIST2H2BE | red |
| ILMN_1683755 | SOX13     | red |
| ILMN_1680831 | BAZ1B     | red |
| ILMN_1779010 | MAP3K3    | red |
| ILMN_1690085 | STK11IP   | red |
| ILMN_1726516 | SCRIB     | red |
| ILMN_2323801 | MOCS1     | red |
| ILMN_2381758 | G3BP2     | red |
| ILMN_2211122 | TRAPPC2P1 | red |
| ILMN_2175601 | VDAC1     | red |
| ILMN_1782079 | ZFP3      | red |
| ILMN_1734184 | PLBD2     | red |
| ILMN_1656977 | HIBCH     | red |
| ILMN_1749892 | EGLN1     | red |
| ILMN_1889752 | C6orf228  | red |
| ILMN_2205935 | SFXN1     | red |
| ILMN_1704383 | TRIM37    | red |
| ILMN_2103720 | MRPL15    | red |
| ILMN_1767459 | POLR3B    | red |
| ILMN_2120340 | RUVBL2    | red |
| ILMN_1778734 | FAN1      | red |
| ILMN_1800697 | LDB2      | red |
| ILMN_1701507 | EHHADH    | red |
| ILMN_1727389 | CDC16     | red |
| ILMN_2311548 | PTRH2     | red |
| ILMN_1815733 | EIF5      | red |
| ILMN_1746561 | BCL2L2    | red |
| ILMN_1673518 | BRWD1     | red |
| ILMN_1802292 | WDFY2     | red |
| ILMN_2126239 | SMG5      | red |
| ILMN_2067032 | TRAF3IP1  | red |

|              |           |     |
|--------------|-----------|-----|
| ILMN_1777745 | FAM133B   | red |
| ILMN_1805643 | RILPL1    | red |
| ILMN_2411076 | MATR3     | red |
| ILMN_2158705 | ACYP2     | red |
| ILMN_1712035 | TMEM115   | red |
| ILMN_2344002 | GEMIN2    | red |
| ILMN_1733956 | IARS      | red |
| ILMN_2361862 | VLDLR     | red |
| ILMN_1745813 | KIAA1279  | red |
| ILMN_1781999 | ABCF2     | red |
| ILMN_1778587 | PPP2R2D   | red |
| ILMN_1812557 | CDK5RAP3  | red |
| ILMN_1805561 | SLC14A1   | red |
| ILMN_1659437 | TXNDC17   | red |
| ILMN_1812441 | FAM222B   | red |
| ILMN_1757406 | HIST1H1C  | red |
| ILMN_1651315 | HMG20B    | red |
| ILMN_1730523 | FAM195A   | red |
| ILMN_1675671 | ICOSLG    | red |
| ILMN_1712748 | C14orf129 | red |
| ILMN_1756572 | COQ2      | red |
| ILMN_2367782 | STARD7    | red |
| ILMN_1748616 | GTF2F1    | red |
| ILMN_1752273 | KIAA1143  | red |
| ILMN_1693233 | KIAA0513  | red |
| ILMN_1692272 | TEX261    | red |
| ILMN_1802355 | RBM18     | red |
| ILMN_1726873 | TPCN2     | red |
| ILMN_2155322 | ZNF652    | red |
| ILMN_1734096 | DCLRE1A   | red |
| ILMN_2401906 | CDAN1     | red |
| ILMN_2059886 | TTC38     | red |
| ILMN_1698189 | AASDHPPT  | red |
| ILMN_1754660 | ZCCHC24   | red |
| ILMN_2338785 | RPS14     | red |
| ILMN_1775448 | PFN2      | red |
| ILMN_1761981 | FAM96A    | red |
| ILMN_1760714 | RPS3      | red |
| ILMN_1770466 | ATP5G3    | red |
| ILMN_1781580 | BRI3      | red |
| ILMN_2130838 | UTP11L    | red |
| ILMN_1670218 | EXOSC6    | red |
| ILMN_1694711 | MAD2L1BP  | red |
| ILMN_1722089 | RNF217    | red |
| ILMN_1704571 | FAM53B    | red |

|              |           |        |
|--------------|-----------|--------|
| ILMN_1668721 | CCND3     | red    |
| ILMN_1714759 | CNIH4     | red    |
| ILMN_2340065 | UBL5      | red    |
| ILMN_1764383 | MCOLN1    | red    |
| ILMN_1778677 | MRS2      | red    |
| ILMN_2094905 | COMMD10   | red    |
| ILMN_1694219 | ARIH1     | red    |
| ILMN_1736670 | PPP1R3C   | red    |
| ILMN_1792689 | HIST1H2AC | red    |
| ILMN_1654421 | MPHOSPH9  | red    |
| ILMN_1781996 | NUDT16    | red    |
| ILMN_1805481 | TRMT11    | red    |
| ILMN_1709894 | CLPX      | red    |
| ILMN_1736130 | RBFA      | red    |
| ILMN_1742432 | COBRA1    | red    |
| ILMN_1814173 | SMARCA4   | red    |
| ILMN_1793201 | HAGHL     | red    |
| ILMN_1716071 | PAQR3     | red    |
| ILMN_1745076 | CLINT1    | red    |
| ILMN_1680208 | RPL13AP7  | red    |
| ILMN_1809951 | ZNF200    | red    |
| ILMN_1700955 | TCTEX1D2  | red    |
| ILMN_1684461 | CADPS2    | red    |
| ILMN_1651628 | EXOC6     | red    |
| ILMN_2355665 | MTFP1     | red    |
| ILMN_1656676 | ZYG11B    | red    |
| ILMN_1689119 | UNK       | red    |
| ILMN_1775761 | TSR1      | red    |
| ILMN_1772645 | AGK       | red    |
| ILMN_2118864 | RAB1A     | red    |
| ILMN_1739397 | GLMN      | red    |
| ILMN_1802380 | RERE      | salmon |
| ILMN_1792356 | DPYSL4    | salmon |
| ILMN_1654893 | SCAMP2    | salmon |
| ILMN_1683462 | GSS       | salmon |
| ILMN_1738632 | PRKAR1A   | salmon |
| ILMN_1785857 | ISY1      | salmon |
| ILMN_2370772 | EIF4G1    | salmon |
| ILMN_1739586 | FEZ2      | salmon |
| ILMN_1653861 | SCMH1     | salmon |
| ILMN_1664608 | INPP5A    | salmon |
| ILMN_1699489 | TUBB6     | salmon |
| ILMN_1684647 | ILKAP     | salmon |
| ILMN_1680196 | LAPTM4B   | salmon |
| ILMN_2301722 | PDE8B     | salmon |

|              |           |        |
|--------------|-----------|--------|
| ILMN_1733998 | DHRS9     | salmon |
| ILMN_2397880 | CSTF3     | salmon |
| ILMN_1738147 | NES       | salmon |
| ILMN_1715684 | LAMB3     | salmon |
| ILMN_2230025 | PDLIM3    | salmon |
| ILMN_2152581 | STK38     | salmon |
| ILMN_1773865 | HSPA5     | salmon |
| ILMN_1727194 | CALU      | salmon |
| ILMN_1661194 | CLDN14    | salmon |
| ILMN_1659874 | SCAF4     | salmon |
| ILMN_2355831 | FHL2      | salmon |
| ILMN_2305544 | DBI       | salmon |
| ILMN_1767422 | POLR1D    | salmon |
| ILMN_1815346 | TMEM136   | salmon |
| ILMN_1804735 | CBS       | salmon |
| ILMN_1716407 | SORBS2    | salmon |
| ILMN_1685170 | ANXA11    | salmon |
| ILMN_1794213 | ABHD14A   | salmon |
| ILMN_1690342 | LTA4H     | salmon |
| ILMN_1669714 | MYH7      | salmon |
| ILMN_2351466 | NTM       | salmon |
| ILMN_1705261 | CAPN1     | salmon |
| ILMN_1674402 | TMEM71    | salmon |
| ILMN_1763568 | ZDHHC16   | salmon |
| ILMN_1687743 | BTBD7     | salmon |
| ILMN_2119224 | KIFAP3    | salmon |
| ILMN_1843198 | AK4       | salmon |
| ILMN_1771987 | SLC44A2   | salmon |
| ILMN_1672496 | DNAJA1    | salmon |
| ILMN_2185845 | BRSK1     | salmon |
| ILMN_1685156 | ADCY6     | salmon |
| ILMN_2389582 | HNRNPL    | salmon |
| ILMN_1671106 | GJA4      | salmon |
| ILMN_1778347 | NUDT2     | salmon |
| ILMN_1734353 | GPX4      | salmon |
| ILMN_1774432 | DTD1      | salmon |
| ILMN_2054607 | CYP4V2    | salmon |
| ILMN_2049727 | C20orf111 | salmon |
| ILMN_1813530 | AGT       | salmon |
| ILMN_2367239 | RCAN1     | salmon |
| ILMN_1796339 | PLEKHA2   | salmon |
| ILMN_1716089 | KANK2     | salmon |
| ILMN_1788095 | SPRYD3    | salmon |
| ILMN_2320250 | NOL6      | salmon |
| ILMN_1706957 | BMPR1A    | salmon |

|              |          |        |
|--------------|----------|--------|
| ILMN_1780898 | PRKCH    | salmon |
| ILMN_1695797 | NCOA6    | salmon |
| ILMN_1793549 | PTPN4    | salmon |
| ILMN_1661376 | GRIK2    | salmon |
| ILMN_1710962 | TMEM97   | salmon |
| ILMN_1814333 | SERPINI1 | salmon |
| ILMN_1774207 | ANGPT2   | salmon |
| ILMN_2145116 | TMEM173  | salmon |
| ILMN_1691090 | MPV17    | salmon |
| ILMN_1808821 | COMMD9   | salmon |
| ILMN_1814022 | NR1H3    | salmon |
| ILMN_1714159 | LUZP1    | salmon |
| ILMN_1807455 | DHRS7    | salmon |
| ILMN_1679460 | PPFIBP1  | salmon |
| ILMN_1758939 | RIPK2    | salmon |
| ILMN_1756006 | ATG2A    | salmon |
| ILMN_1689989 | CDC42BPB | salmon |
| ILMN_1800733 | MANBA    | salmon |
| ILMN_1810725 | FAM129A  | salmon |
| ILMN_1730940 | KLHDC3   | salmon |
| ILMN_1680314 | TXN      | salmon |
| ILMN_1724897 | C14orf93 | salmon |
| ILMN_1760778 | ENG      | salmon |
| ILMN_1740742 | UROD     | salmon |
| ILMN_1750664 | PPT2     | salmon |
| ILMN_1662880 | C5orf27  | salmon |
| ILMN_2153332 | ATXN1    | salmon |
| ILMN_2143250 | FAR1     | salmon |
| ILMN_2406552 | PIDD     | salmon |
| ILMN_1657087 | ZNF385B  | salmon |
| ILMN_1757877 | HCFC1R1  | salmon |
| ILMN_1803788 | LGALS3   | salmon |
| ILMN_2186137 | RRAD     | salmon |
| ILMN_1728528 | ZNF655   | salmon |
| ILMN_1766925 | CDH13    | salmon |
| ILMN_1752755 | VWF      | salmon |
| ILMN_1744949 | RHOBTB3  | salmon |
| ILMN_1810225 | UVSSA    | salmon |
| ILMN_1682273 | SHISA3   | salmon |
| ILMN_1723843 | CSNK2A2  | salmon |
| ILMN_1798177 | CHURC1   | salmon |
| ILMN_1669851 | STAG3L4  | salmon |
| ILMN_1723874 | MRPS6    | salmon |
| ILMN_1765966 | CHGB     | salmon |
| ILMN_1770206 | GEMIN4   | salmon |

|              |            |        |
|--------------|------------|--------|
| ILMN_1776998 | DNAJA4     | salmon |
| ILMN_1708204 | COPG1      | salmon |
| ILMN_1660232 | PEX5       | salmon |
| ILMN_1780667 | POC1A      | salmon |
| ILMN_1719199 | TULP3      | salmon |
| ILMN_1708743 | NT5DC2     | salmon |
| ILMN_1658182 | MEX3C      | salmon |
| ILMN_1665212 | EDC4       | salmon |
| ILMN_1735584 | ST8SIA5    | salmon |
| ILMN_2192385 | TTC19      | salmon |
| ILMN_1708081 | LCLAT1     | salmon |
| ILMN_1748438 | POLR2G     | salmon |
| ILMN_1682799 | STAMBPL1   | salmon |
| ILMN_1674236 | HSPB1      | salmon |
| ILMN_1689237 | BVES       | salmon |
| ILMN_1715416 | NUP188     | salmon |
| ILMN_1704206 | NPSR1      | salmon |
| ILMN_1729767 | TARBP2     | salmon |
| ILMN_1694111 | PNKP       | salmon |
| ILMN_1690880 | CTAGE5     | salmon |
| ILMN_1792389 | RNF165     | tan    |
| ILMN_1778226 | EXTL3      | tan    |
| ILMN_2386818 | URGCP      | tan    |
| ILMN_1780861 | METRNL     | tan    |
| ILMN_1801833 | ARHGAP24   | tan    |
| ILMN_1661264 | SHMT2      | tan    |
| ILMN_1687857 | ST6GALNAC4 | tan    |
| ILMN_1745623 | EFCAB4A    | tan    |
| ILMN_1713964 | BTBD3      | tan    |
| ILMN_1733667 | DHX35      | tan    |
| ILMN_2046611 | MCOLN3     | tan    |
| ILMN_1743402 | SIX4       | tan    |
| ILMN_1723684 | DARC       | tan    |
| ILMN_1726288 | TMEM106B   | tan    |
| ILMN_1786278 | FAM149A    | tan    |
| ILMN_1792415 | GTDC2      | tan    |
| ILMN_1662658 | PUS1       | tan    |
| ILMN_1700461 | AARSD1     | tan    |
| ILMN_1759411 | C16orf79   | tan    |
| ILMN_1720771 | STX11      | tan    |
| ILMN_1766542 | RNPC3      | tan    |
| ILMN_1796377 | C14orf37   | tan    |
| ILMN_1715669 | TP53I11    | tan    |
| ILMN_2302118 | CCDC50     | tan    |
| ILMN_1769409 | C9orf123   | tan    |

|              |          |     |
|--------------|----------|-----|
| ILMN_1784766 | MCM3AP   | tan |
| ILMN_2364022 | SLC16A3  | tan |
| ILMN_1689431 | APCDD1L  | tan |
| ILMN_1679358 | ZDHHC5   | tan |
| ILMN_1808202 | R3HDM4   | tan |
| ILMN_1800447 | PHKB     | tan |
| ILMN_1873621 | NTN1     | tan |
| ILMN_1751559 | TMEM204  | tan |
| ILMN_1807304 | MBNL1    | tan |
| ILMN_1718177 | CYP20A1  | tan |
| ILMN_1736828 | CHST10   | tan |
| ILMN_1694223 | DGCR8    | tan |
| ILMN_1809101 | STEAP2   | tan |
| ILMN_1695719 | EIF2C2   | tan |
| ILMN_1721901 | CTNNAL1  | tan |
| ILMN_1776515 | MPPE1    | tan |
| ILMN_1696537 | DDIT4L   | tan |
| ILMN_1655614 | DSP      | tan |
| ILMN_2059211 | KIAA0195 | tan |
| ILMN_1705231 | SLCO2A1  | tan |
| ILMN_1723768 | NLRX1    | tan |
| ILMN_1768181 | TOR3A    | tan |
| ILMN_1747556 | CDK9     | tan |
| ILMN_1662795 | CA2      | tan |
| ILMN_1658176 | ABCG1    | tan |
| ILMN_1755589 | DIP2B    | tan |
| ILMN_1753010 | PET112   | tan |
| ILMN_1793630 | SLC4A3   | tan |
| ILMN_1761113 | GNL2     | tan |
| ILMN_2215545 | C3orf26  | tan |
| ILMN_1775498 | FAM100B  | tan |
| ILMN_1713901 | KDEL3    | tan |
| ILMN_1665964 | GAB2     | tan |
| ILMN_1656186 | SLC41A1  | tan |
| ILMN_1796216 | VASH1    | tan |
| ILMN_2120555 | ADCY1    | tan |
| ILMN_2325347 | B3GALNT1 | tan |
| ILMN_2075051 | PGS1     | tan |
| ILMN_1784678 | PBX1     | tan |
| ILMN_1735495 | TBC1D8   | tan |
| ILMN_1768662 | UCK2     | tan |
| ILMN_1730487 | CALD1    | tan |
| ILMN_2120210 | RCAN2    | tan |
| ILMN_2363591 | SDCBP    | tan |
| ILMN_1799589 | NOXA1    | tan |

|              |          |     |
|--------------|----------|-----|
| ILMN_1748970 | PRR15L   | tan |
| ILMN_2398926 | C17orf58 | tan |
| ILMN_1711089 | DNAJC21  | tan |
| ILMN_2052208 | GADD45A  | tan |
| ILMN_2116127 | NPEPPS   | tan |
| ILMN_1700834 | SLK      | tan |
| ILMN_1654118 | BCL2L1   | tan |
| ILMN_1738173 | METTL4   | tan |
| ILMN_1655563 | CTIF     | tan |
| ILMN_1767848 | PCMTD2   | tan |
| ILMN_1655884 | ATP2A2   | tan |
| ILMN_1754051 | RMI1     | tan |
| ILMN_1705144 | ULK1     | tan |
| ILMN_1813175 | LPHN1    | tan |
| ILMN_1674817 | C1orf115 | tan |
| ILMN_1718621 | TSPAN32  | tan |
| ILMN_1653133 | SH3D19   | tan |
| ILMN_1730611 | RTN4     | tan |
| ILMN_1767263 | FUBP3    | tan |
| ILMN_1720708 | CSNK1D   | tan |
| ILMN_1804476 | GMPPA    | tan |
| ILMN_2306540 | PDE9A    | tan |
| ILMN_1676984 | DDIT3    | tan |
| ILMN_1699723 | RARB     | tan |
| ILMN_1793859 | ALDH2    | tan |
| ILMN_1762207 | SGSM1    | tan |
| ILMN_2378376 | CYB561   | tan |
| ILMN_2063925 | CTNBL1   | tan |
| ILMN_1665331 | AMT      | tan |
| ILMN_1808590 | GUCY1A3  | tan |
| ILMN_1674135 | RALGPS1  | tan |
| ILMN_1733176 | LIMS1    | tan |
| ILMN_1722753 | GJA5     | tan |
| ILMN_1803256 | STOX2    | tan |
| ILMN_2191313 | FAM21A   | tan |
| ILMN_1685703 | ACOX2    | tan |
| ILMN_1682165 | NT5C2    | tan |
| ILMN_2210934 | NR3C2    | tan |
| ILMN_2160929 | FEN1     | tan |
| ILMN_1692267 | B4GALT3  | tan |
| ILMN_2343278 | PPAP2A   | tan |
| ILMN_1804629 | TPK1     | tan |
| ILMN_1682449 | ZNF518B  | tan |
| ILMN_2110252 | NPM3     | tan |
| ILMN_1786189 | MKI67IP  | tan |

|              |          |     |
|--------------|----------|-----|
| ILMN_2157240 | MNS1     | tan |
| ILMN_2214098 | BIVM     | tan |
| ILMN_1685679 | RNF146   | tan |
| ILMN_2290998 | CCS      | tan |
| ILMN_1729455 | EML1     | tan |
| ILMN_1770412 | AHCYL1   | tan |
| ILMN_1781198 | PPP1R3D  | tan |
| ILMN_1731546 | RPL26    | tan |
| ILMN_1712944 | AES      | tan |
| ILMN_2049693 | C11orf71 | tan |
| ILMN_1656560 | PARM1    | tan |
| ILMN_2237746 | ING3     | tan |
| ILMN_1806533 | PDE7B    | tan |
| ILMN_1692785 | KLHL21   | tan |
| ILMN_1742935 | ZNF33B   | tan |
| ILMN_2411963 | RBM39    | tan |
| ILMN_1745130 | RBFox2   | tan |
| ILMN_1666482 | SP2      | tan |
| ILMN_1772224 | KCNJ5    | tan |
| ILMN_1654541 | ATP6V1G2 | tan |
| ILMN_2387090 | CGGBP1   | tan |
| ILMN_2227790 | GRIN2C   | tan |
| ILMN_1690252 | ALKBH2   | tan |
| ILMN_1789463 | FXD1     | tan |
| ILMN_1668072 | PGAM2    | tan |
| ILMN_1667716 | TMEM101  | tan |
| ILMN_1768773 | EGLN2    | tan |
| ILMN_2129161 | LRRC32   | tan |
| ILMN_1769575 | JAM3     | tan |
| ILMN_1673185 | CPSF2    | tan |
| ILMN_1719518 | ARF4     | tan |
| ILMN_1703955 | FBXO32   | tan |
| ILMN_2210729 | STYXL1   | tan |
| ILMN_1690487 | PCM1     | tan |
| ILMN_1747058 | TRAPPC2L | tan |
| ILMN_1772113 | U2AF1    | tan |
| ILMN_1694514 | ZDHHC11  | tan |
| ILMN_1790173 | COL28A1  | tan |
| ILMN_1724293 | KDEL2    | tan |
| ILMN_1662174 | ORMDL3   | tan |
| ILMN_1709114 | TAB1     | tan |
| ILMN_1811823 | MED25    | tan |
| ILMN_1783304 | ATP1B3   | tan |
| ILMN_1711919 | SCYL2    | tan |
| ILMN_1801205 | GPNMB    | tan |

|              |          |     |
|--------------|----------|-----|
| ILMN_1733627 | NEDD4L   | tan |
| ILMN_1673682 | GATAD2A  | tan |
| ILMN_1805543 | ADAMTS9  | tan |
| ILMN_2283325 | WLS      | tan |
| ILMN_1679919 | ASCC2    | tan |
| ILMN_2360705 | ACSL3    | tan |
| ILMN_1717599 | CNTN3    | tan |
| ILMN_1671911 | MTA1     | tan |
| ILMN_1696767 | SERP2    | tan |
| ILMN_1664641 | MED4     | tan |
| ILMN_1682147 | HOOK2    | tan |
| ILMN_1787251 | DAAM1    | tan |
| ILMN_2392189 | CTDSPL   | tan |
| ILMN_1678037 | HIRIP3   | tan |
| ILMN_1799104 | SPAG9    | tan |
| ILMN_2139761 | LIMCH1   | tan |
| ILMN_1718907 | TSHZ1    | tan |
| ILMN_1771957 | MAN1B1   | tan |
| ILMN_1780698 | ZFYVE19  | tan |
| ILMN_1655557 | INTS6    | tan |
| ILMN_2335718 | HNRNPAB  | tan |
| ILMN_1741133 | NME1     | tan |
| ILMN_1765532 | RDBP     | tan |
| ILMN_2357730 | CDK20    | tan |
| ILMN_2199313 | NPDC1    | tan |
| ILMN_2326713 | CD151    | tan |
| ILMN_2174081 | ZNF133   | tan |
| ILMN_1813010 | VTA1     | tan |
| ILMN_1696065 | SDF4     | tan |
| ILMN_1770356 | POLRMT   | tan |
| ILMN_1657495 | MLEC     | tan |
| ILMN_1763640 | NCKAP5L  | tan |
| ILMN_1707695 | IFIT1    | tan |
| ILMN_2179717 | FAM189A2 | tan |
| ILMN_1766916 | RPAP3    | tan |
| ILMN_1703314 | KLHL36   | tan |
| ILMN_2178587 | ANKRD6   | tan |
| ILMN_1906187 | CAMK1D   | tan |
| ILMN_2329114 | COLQ     | tan |
| ILMN_1803611 | SNAPC3   | tan |
| ILMN_1685824 | B4GALT5  | tan |
| ILMN_2358541 | RBMS1    | tan |
| ILMN_1787648 | GPR125   | tan |
| ILMN_1663538 | CLYBL    | tan |
| ILMN_2227968 | NTHL1    | tan |

|              |          |     |
|--------------|----------|-----|
| ILMN_1694589 | PAQR8    | tan |
| ILMN_1734254 | ZNF770   | tan |
| ILMN_2049303 | ECI1     | tan |
| ILMN_1665049 | SPG11    | tan |
| ILMN_1693338 | CYP1B1   | tan |
| ILMN_1706539 | KDM3B    | tan |
| ILMN_2118472 | FAM213A  | tan |
| ILMN_1785732 | TNFAIP6  | tan |
| ILMN_1791226 | NXN      | tan |
| ILMN_2041577 | SLC52A2  | tan |
| ILMN_1678268 | VPS8     | tan |
| ILMN_1791366 | RCOR2    | tan |
| ILMN_1775573 | DPY19L4  | tan |
| ILMN_1691572 | TST      | tan |
| ILMN_1773650 | LRRN3    | tan |
| ILMN_2388155 | CASP3    | tan |
| ILMN_1715384 | B3GNT1   | tan |
| ILMN_1710906 | RNF145   | tan |
| ILMN_1708841 | GOLPH3   | tan |
| ILMN_1671568 | ECHDC2   | tan |
| ILMN_1724666 | INADL    | tan |
| ILMN_2383611 | PTPRE    | tan |
| ILMN_2220187 | GFPT1    | tan |
| ILMN_1656940 | ABLIM3   | tan |
| ILMN_1730670 | FSTL3    | tan |
| ILMN_1674034 | H2AFY    | tan |
| ILMN_1767960 | NSUN7    | tan |
| ILMN_2144088 | FDFT1    | tan |
| ILMN_1704154 | TNFRSF19 | tan |
| ILMN_1750912 | STXBP6   | tan |
| ILMN_2209748 | DERL1    | tan |
| ILMN_1655915 | MMP11    | tan |
| ILMN_1786347 | TNPO1    | tan |
| ILMN_1729430 | FBXO18   | tan |
| ILMN_2410909 | AKT1     | tan |
| ILMN_1810100 | PBX3     | tan |
| ILMN_1762466 | BBS4     | tan |
| ILMN_1726368 | ZNF135   | tan |
| ILMN_1656682 | AZIN1    | tan |
| ILMN_1815032 | SOX7     | tan |
| ILMN_1804150 | HIBADH   | tan |
| ILMN_1815719 | PLCG2    | tan |
| ILMN_1652065 | KCNMB1   | tan |
| ILMN_1678504 | RHOT1    | tan |
| ILMN_1718193 | MYLK3    | tan |

|              |          |     |
|--------------|----------|-----|
| ILMN_1662470 | C10orf35 | tan |
| ILMN_2395285 | SNRNP35  | tan |
| ILMN_1668514 | PIP5K1C  | tan |
| ILMN_2235283 | MAPK1    | tan |
| ILMN_2406892 | URI1     | tan |
| ILMN_2309228 | GPS1     | tan |
| ILMN_1753639 | MTAP     | tan |
| ILMN_1784238 | SEC22B   | tan |
| ILMN_1766408 | CBFB     | tan |
| ILMN_1757807 | AGXT2L1  | tan |
| ILMN_1785926 | ZNF621   | tan |
| ILMN_1717490 | RPL6     | tan |
| ILMN_2115125 | CTGF     | tan |
| ILMN_1678730 | NOMO1    | tan |
| ILMN_2201678 | FSTL1    | tan |
| ILMN_1769883 | IDE      | tan |
| ILMN_1781231 | SLC25A38 | tan |
| ILMN_1671693 | TPGS2    | tan |
| ILMN_1750722 | RPS7     | tan |
| ILMN_1737988 | PRNP     | tan |
| ILMN_1666385 | CALM3    | tan |
| ILMN_2056606 | PPP1R1A  | tan |
| ILMN_1735461 | DDX21    | tan |
| ILMN_2365881 | ATG16L1  | tan |
| ILMN_1728228 | ZNF548   | tan |
| ILMN_1760121 | RRAGC    | tan |
| ILMN_1657744 | FAM219B  | tan |
| ILMN_1695491 | WDYHV1   | tan |
| ILMN_2406106 | CACNB2   | tan |
| ILMN_1704353 | IGSF3    | tan |
| ILMN_1699545 | PCSK7    | tan |
| ILMN_1697962 | NSMCE1   | tan |
| ILMN_1766499 | HSPA2    | tan |
| ILMN_2308849 | MYADM    | tan |
| ILMN_1669032 | PPIC     | tan |
| ILMN_2285802 | SEC14L1  | tan |
| ILMN_1747577 | ALAD     | tan |
| ILMN_1777344 | RPS13    | tan |
| ILMN_1691559 | ELF2     | tan |
| ILMN_1679428 | CHIC2    | tan |
| ILMN_2088172 | POLR2B   | tan |
| ILMN_2289924 | TRAK1    | tan |
| ILMN_1737157 | GRAMD1A  | tan |
| ILMN_2404049 | RBM38    | tan |
| ILMN_1797475 | FAM216B  | tan |

|              |           |     |
|--------------|-----------|-----|
| ILMN_1707062 | REV1      | tan |
| ILMN_2225709 | PTCD1     | tan |
| ILMN_1725746 | CARNS1    | tan |
| ILMN_1811102 | LRSAM1    | tan |
| ILMN_1652753 | PAAF1     | tan |
| ILMN_1666122 | HEG1      | tan |
| ILMN_1797367 | TSC1      | tan |
| ILMN_1779071 | FEZ1      | tan |
| ILMN_1695959 | FAM176C   | tan |
| ILMN_1745778 | SLC45A4   | tan |
| ILMN_1702691 | TNFAIP3   | tan |
| ILMN_1753584 | KRT8      | tan |
| ILMN_1726108 | CERS2     | tan |
| ILMN_2415189 | ATP1A1    | tan |
| ILMN_1761531 | SGPL1     | tan |
| ILMN_1716019 | RHBDL3    | tan |
| ILMN_1651719 | MBTPS1    | tan |
| ILMN_1695276 | MAPRE2    | tan |
| ILMN_1750511 | NT5C3L    | tan |
| ILMN_1716507 | EPB41L1   | tan |
| ILMN_1739558 | CRELD1    | tan |
| ILMN_2047112 | DPCD      | tan |
| ILMN_2093389 | SNAPC1    | tan |
| ILMN_1680987 | HAND1     | tan |
| ILMN_1789171 | EEF2K     | tan |
| ILMN_2175465 | RSL24D1   | tan |
| ILMN_2410772 | KEAP1     | tan |
| ILMN_1753582 | RPA2      | tan |
| ILMN_1767446 | RNF150    | tan |
| ILMN_1749866 | GATA4     | tan |
| ILMN_1658333 | ECM1      | tan |
| ILMN_1764096 | CCBL1     | tan |
| ILMN_1679725 | PCYOX1    | tan |
| ILMN_1810274 | HOXB2     | tan |
| ILMN_1660793 | PAQR4     | tan |
| ILMN_2047599 | TMEM50B   | tan |
| ILMN_1767253 | RRP12     | tan |
| ILMN_1677200 | CYFIP2    | tan |
| ILMN_1696675 | CES2      | tan |
| ILMN_1708328 | RAB11FIP3 | tan |
| ILMN_1755954 | CPEB3     | tan |
| ILMN_1792176 | TADA3     | tan |
| ILMN_1673073 | WDR62     | tan |
| ILMN_2386016 | C2orf28   | tan |
| ILMN_1806692 | HEXB      | tan |

|              |           |     |
|--------------|-----------|-----|
| ILMN_2230683 | CDCA7L    | tan |
| ILMN_1710427 | VPS37B    | tan |
| ILMN_2399896 | SEC31A    | tan |
| ILMN_1743714 | CARD10    | tan |
| ILMN_2324056 | GNL3      | tan |
| ILMN_1710209 | MFSD6     | tan |
| ILMN_2399310 | MLLT10    | tan |
| ILMN_1727001 | DDX46     | tan |
| ILMN_1752932 | MPZL2     | tan |
| ILMN_2072973 | TOP3A     | tan |
| ILMN_1719143 | APOBEC2   | tan |
| ILMN_2050255 | UCKL1     | tan |
| ILMN_1699665 | CLIC6     | tan |
| ILMN_1785644 | AP5S1     | tan |
| ILMN_1801616 | EMP1      | tan |
| ILMN_2128770 | CDR2L     | tan |
| ILMN_1763228 | MEF2D     | tan |
| ILMN_2197128 | OSR1      | tan |
| ILMN_2321416 | DIAPH1    | tan |
| ILMN_1703246 | SBF1      | tan |
| ILMN_1777411 | ATP1A2    | tan |
| ILMN_1734830 | MTHFR     | tan |
| ILMN_2104106 | XPR1      | tan |
| ILMN_2069593 | SCAF11    | tan |
| ILMN_2352131 | ERBB2     | tan |
| ILMN_2402640 | DSC1      | tan |
| ILMN_1726928 | TCEA3     | tan |
| ILMN_1743373 | DLL1      | tan |
| ILMN_1783546 | CARKD     | tan |
| ILMN_1747227 | ADORA1    | tan |
| ILMN_1815673 | DKK3      | tan |
| ILMN_1715647 | VANGL2    | tan |
| ILMN_1808487 | PLA2G12B  | tan |
| ILMN_1784217 | SOX15     | tan |
| ILMN_1785756 | H2AFX     | tan |
| ILMN_1763461 | ALDH7A1   | tan |
| ILMN_1674380 | TRPC1     | tan |
| ILMN_1807031 | C14orf28  | tan |
| ILMN_2371379 | ACLY      | tan |
| ILMN_2215119 | SYNJ2     | tan |
| ILMN_1763144 | NEU1      | tan |
| ILMN_1689515 | CPLX3     | tan |
| ILMN_2180682 | MTPN      | tan |
| ILMN_1803279 | TMED5     | tan |
| ILMN_1680781 | C14orf135 | tan |

|              |               |     |
|--------------|---------------|-----|
| ILMN_1759513 | RND3          | tan |
| ILMN_1772605 | FRS3          | tan |
| ILMN_1812856 | ZSWIM1        | tan |
| ILMN_2222065 | FZD1          | tan |
| ILMN_1705049 | TMEM67        | tan |
| ILMN_1811178 | SCAPER        | tan |
| ILMN_1688152 | IL27RA        | tan |
| ILMN_1700044 | SAP130        | tan |
| ILMN_1657373 | LEPREL1       | tan |
| ILMN_1718070 | CASP9         | tan |
| ILMN_1763382 | NPPB          | tan |
| ILMN_1796900 | NUDCD3        | tan |
| ILMN_1707326 | TASP1         | tan |
| ILMN_1791847 | DAPK2         | tan |
| ILMN_1791967 | C20orf166-AS1 | tan |
| ILMN_1659688 | LGALS3BP      | tan |
| ILMN_1671427 | FBXW4         | tan |
| ILMN_1807767 | KIAA0182      | tan |
| ILMN_1770020 | PPIL3         | tan |
| ILMN_1715927 | VSTM2L        | tan |
| ILMN_2305721 | POMT1         | tan |
| ILMN_1681591 | PTPN1         | tan |
| ILMN_1751072 | SRPRB         | tan |
| ILMN_1673820 | HLTF          | tan |
| ILMN_1703754 | CEP192        | tan |
| ILMN_1805807 | SLC30A3       | tan |
| ILMN_2148819 | TUBA1A        | tan |
| ILMN_1710697 | BUD31         | tan |
| ILMN_2077886 | C1orf109      | tan |
| ILMN_1716488 | PACS1         | tan |
| ILMN_1761566 | CYSTM1        | tan |
| ILMN_1741032 | HERC3         | tan |
| ILMN_2136177 | CNOT6         | tan |
| ILMN_1780825 | RRAS          | tan |
| ILMN_1754839 | DHX15         | tan |
| ILMN_1712975 | YIF1A         | tan |
| ILMN_1734445 | PKDCC         | tan |
| ILMN_1812841 | C8orf34       | tan |
| ILMN_1784785 | COPS7B        | tan |
| ILMN_1721457 | RANBP1        | tan |
| ILMN_1671686 | EPB49         | tan |
| ILMN_1720344 | NIPA2         | tan |
| ILMN_1693951 | C14orf180     | tan |
| ILMN_1699644 | MARCH3        | tan |
| ILMN_1682781 | TEAD2         | tan |

|              |          |     |
|--------------|----------|-----|
| ILMN_1737965 | ELOVL4   | tan |
| ILMN_1681515 | CRLF1    | tan |
| ILMN_1734742 | ARHGDI1A | tan |
| ILMN_1693630 | C16orf7  | tan |
| ILMN_2047676 | OSGEPL1  | tan |
| ILMN_2148507 | ANKRD13C | tan |
| ILMN_1715463 | SOSTDC1  | tan |
| ILMN_1789058 | RNF207   | tan |
| ILMN_1766346 | ZNF512B  | tan |
| ILMN_1749218 | TOPORS   | tan |
| ILMN_1658499 | SYT13    | tan |
| ILMN_2375484 | CPEB2    | tan |
| ILMN_1780036 | WDR1     | tan |
| ILMN_1791067 | TESK1    | tan |
| ILMN_1692168 | UBE2Z    | tan |
| ILMN_1789436 | DENND1B  | tan |
| ILMN_1755588 | KANK3    | tan |
| ILMN_1747303 | DDX39A   | tan |
| ILMN_1667748 | ANKRD33  | tan |
| ILMN_1779486 | FAM126B  | tan |
| ILMN_1658399 | KLRG1    | tan |
| ILMN_1733811 | JUP      | tan |
| ILMN_1733221 | SEMA4D   | tan |
| ILMN_1727740 | SYNCRIP  | tan |
| ILMN_1776519 | RAP1GAP  | tan |
| ILMN_1664424 | ZBED5    | tan |
| ILMN_1659054 | CHKB     | tan |
| ILMN_1694426 | ROR2     | tan |
| ILMN_1734229 | SPPL2A   | tan |
| ILMN_1691112 | PIGN     | tan |
| ILMN_1711030 | OPLAH    | tan |
| ILMN_1750181 | TESC     | tan |
| ILMN_2403664 | POMC     | tan |
| ILMN_1672589 | SEMA4B   | tan |
| ILMN_2180239 | DOPEY2   | tan |
| ILMN_2232177 | ACTN1    | tan |
| ILMN_1731287 | ARFGAP3  | tan |
| ILMN_1738494 | AQP7     | tan |
| ILMN_2395043 | HSPA4    | tan |
| ILMN_2175447 | ZNF767   | tan |
| ILMN_1795338 | YPEL1    | tan |
| ILMN_1758337 | ZNF213   | tan |
| ILMN_1665066 | NOA1     | tan |
| ILMN_1653466 | HES4     | tan |
| ILMN_1680353 | NSF      | tan |

|              |          |     |
|--------------|----------|-----|
| ILMN_1781560 | ST3GAL6  | tan |
| ILMN_1782688 | THNSL1   | tan |
| ILMN_1753502 | IGSF11   | tan |
| ILMN_1667043 | EIF4A3   | tan |
| ILMN_1707649 | MPDZ     | tan |
| ILMN_1803855 | FAIM2    | tan |
| ILMN_1722059 | SAFB     | tan |
| ILMN_1732537 | HEATR2   | tan |
| ILMN_1731157 | MYOZ1    | tan |
| ILMN_1705390 | KLHL22   | tan |
| ILMN_1795428 | WDR59    | tan |
| ILMN_2343048 | ABCB9    | tan |
| ILMN_2064725 | METTTL7B | tan |
| ILMN_1694432 | CRIP2    | tan |
| ILMN_1733690 | AKAP7    | tan |
| ILMN_2334042 | THYN1    | tan |
| ILMN_1702501 | RPS6KA2  | tan |
| ILMN_1656501 | DUSP5    | tan |
| ILMN_1743655 | TMED9    | tan |
| ILMN_1794643 | ZGPAT    | tan |
| ILMN_1665871 | ANGEL1   | tan |
| ILMN_2341815 | TFG      | tan |
| ILMN_1723021 | ICMT     | tan |
| ILMN_1800590 | BBS1     | tan |
| ILMN_1797566 | SNAP47   | tan |
| ILMN_1661337 | SRM      | tan |
| ILMN_1741727 | QPCT     | tan |
| ILMN_1713037 | PFKL     | tan |
| ILMN_1878019 | DOK6     | tan |
| ILMN_1690040 | TM7SF2   | tan |
| ILMN_2111187 | ELOVL6   | tan |
| ILMN_1656136 | STAU1    | tan |
| ILMN_1678165 | LSM7     | tan |
| ILMN_1708934 | ADM      | tan |
| ILMN_1766814 | TK2      | tan |
| ILMN_1793732 | FARS2    | tan |
| ILMN_1771026 | GARS     | tan |
| ILMN_1778240 | GFOD1    | tan |
| ILMN_1661424 | THAP6    | tan |
| ILMN_1803652 | C9orf91  | tan |
| ILMN_2306955 | ACPL2    | tan |
| ILMN_1791511 | TMEM176A | tan |
| ILMN_1787691 | CITED4   | tan |
| ILMN_1754655 | TTLL5    | tan |
| ILMN_1709634 | CMBL     | tan |

|              |           |     |
|--------------|-----------|-----|
| ILMN_1712998 | CORIN     | tan |
| ILMN_1686116 | THBS1     | tan |
| ILMN_1813400 | CBR4      | tan |
| ILMN_1705213 | TMBIM1    | tan |
| ILMN_1787539 | ZNF177    | tan |
| ILMN_1688480 | CCND1     | tan |
| ILMN_1755504 | CALCOCO2  | tan |
| ILMN_1738652 | BAD       | tan |
| ILMN_1666894 | CSPG4     | tan |
| ILMN_1665945 | ACBD3     | tan |
| ILMN_1790026 | SFRP5     | tan |
| ILMN_1696330 | GUF1      | tan |
| ILMN_1735996 | NOX4      | tan |
| ILMN_1795300 | ARHGEF37  | tan |
| ILMN_1687978 | PHLDA1    | tan |
| ILMN_1778010 | IL32      | tan |
| ILMN_1687301 | VCAN      | tan |
| ILMN_1736077 | LIAS      | tan |
| ILMN_1723971 | SLC29A1   | tan |
| ILMN_1653028 | COL4A1    | tan |
| ILMN_1747775 | STX2      | tan |
| ILMN_2153373 | LRBA      | tan |
| ILMN_1815141 | MTR       | tan |
| ILMN_1745041 | TCF15     | tan |
| ILMN_1658884 | ATP11B    | tan |
| ILMN_1666503 | DENND2A   | tan |
| ILMN_2388539 | C17orf101 | tan |
| ILMN_1812968 | SOX18     | tan |
| ILMN_1707372 | RNF187    | tan |
| ILMN_1692219 | RAB11FIP1 | tan |
| ILMN_1690099 | ITGB1BP1  | tan |
| ILMN_1724333 | TOR1B     | tan |
| ILMN_2167616 | NACA      | tan |
| ILMN_2366388 | PRDX1     | tan |
| ILMN_1787718 | SLC27A1   | tan |
| ILMN_1682326 | PCP4      | tan |
| ILMN_2376958 | TBX5      | tan |
| ILMN_1736078 | THBS4     | tan |
| ILMN_2405018 | PPP1CB    | tan |
| ILMN_1785175 | SWAP70    | tan |
| ILMN_1731064 | ADCK3     | tan |
| ILMN_1768101 | HOXB6     | tan |
| ILMN_1804007 | NANOS3    | tan |
| ILMN_1657515 | RPS6KA5   | tan |
| ILMN_1755643 | MGAT4A    | tan |

|              |            |     |
|--------------|------------|-----|
| ILMN_1678290 | HMG20A     | tan |
| ILMN_1750689 | MPP5       | tan |
| ILMN_2378100 | FBXL5      | tan |
| ILMN_1797341 | ARID1A     | tan |
| ILMN_1704305 | NIP7       | tan |
| ILMN_2217935 | RFC1       | tan |
| ILMN_2141482 | SERPINF1   | tan |
| ILMN_1684352 | TRIM45     | tan |
| ILMN_2224143 | MCM3       | tan |
| ILMN_1792679 | ITGA5      | tan |
| ILMN_1730698 | ODF2       | tan |
| ILMN_1742330 | PLXNB1     | tan |
| ILMN_1692072 | CENPBD1    | tan |
| ILMN_1764431 | COPS6      | tan |
| ILMN_1770548 | CLASP2     | tan |
| ILMN_1752111 | SMARCAL1   | tan |
| ILMN_1804737 | RAVER2     | tan |
| ILMN_1682139 | RAI14      | tan |
| ILMN_1811921 | CSRP1      | tan |
| ILMN_1723706 | GRAMD4     | tan |
| ILMN_1684865 | GPR22      | tan |
| ILMN_1675797 | EPDR1      | tan |
| ILMN_1662667 | ANKRD20A8P | tan |
| ILMN_1755235 | XPO6       | tan |
| ILMN_1718769 | ITSN1      | tan |
| ILMN_2173835 | FTH1P3     | tan |
| ILMN_1732060 | ARHGAP1    | tan |
| ILMN_1800261 | TUBA1B     | tan |
| ILMN_1755741 | DACH1      | tan |
| ILMN_1688242 | C6         | tan |
| ILMN_1706523 | FCGR2A     | tan |
| ILMN_2104295 | TMEM178    | tan |
| ILMN_1655225 | C19orf25   | tan |
| ILMN_1802843 | PRCC       | tan |
| ILMN_1765146 | IFNAR2     | tan |
| ILMN_1713162 | GSTM2      | tan |
| ILMN_2156982 | IMP4       | tan |
| ILMN_1801302 | SCN1B      | tan |
| ILMN_1713993 | UBAC2      | tan |
| ILMN_1660063 | POLE4      | tan |
| ILMN_1762436 | UBB        | tan |
| ILMN_2186858 | ZNF839     | tan |
| ILMN_1775170 | MT1X       | tan |
| ILMN_2224486 | C3orf14    | tan |
| ILMN_1782551 | E2F5       | tan |

|              |            |     |
|--------------|------------|-----|
| ILMN_2050813 | CLGN       | tan |
| ILMN_1672022 | EPHA4      | tan |
| ILMN_1814315 | PBXIP1     | tan |
| ILMN_1667239 | INPP1      | tan |
| ILMN_1754045 | FANCL      | tan |
| ILMN_1773741 | GOLGA5     | tan |
| ILMN_2072091 | HNRNPUL2   | tan |
| ILMN_1731745 | NINJ2      | tan |
| ILMN_1773307 | NAP1L5     | tan |
| ILMN_1654639 | HERC6      | tan |
| ILMN_1751887 | PREP       | tan |
| ILMN_1653220 | PITPNM1    | tan |
| ILMN_2221673 | ASNSD1     | tan |
| ILMN_2149164 | SFRP1      | tan |
| ILMN_1749821 | MED28      | tan |
| ILMN_1766264 | PI16       | tan |
| ILMN_1693740 | DNAJC3-AS1 | tan |
| ILMN_1687315 | RXRA       | tan |
| ILMN_1807710 | HINT1      | tan |
| ILMN_1682332 | GYPE       | tan |
| ILMN_1741869 | WDR47      | tan |
| ILMN_1686968 | ZNF362     | tan |
| ILMN_1685140 | PRRC1      | tan |
| ILMN_1736533 | RND2       | tan |
| ILMN_1767111 | ANO10      | tan |
| ILMN_2336094 | ODZ3       | tan |
| ILMN_1701875 | ZYX        | tan |
| ILMN_1680874 | TUBB2B     | tan |
| ILMN_2358560 | TIAM2      | tan |
| ILMN_1713529 | SEMA6A     | tan |
| ILMN_1782829 | GLTSCR1    | tan |
| ILMN_1814971 | TCF25      | tan |
| ILMN_1786197 | NR2F1      | tan |
| ILMN_1793002 | C20orf196  | tan |
| ILMN_1796210 | PPRC1      | tan |
| ILMN_1691476 | MYLK       | tan |
| ILMN_1663379 | FBXL15     | tan |
| ILMN_2070044 | PPM1K      | tan |
| ILMN_1783843 | MIIP       | tan |
| ILMN_1733515 | LOXL3      | tan |
| ILMN_1668027 | NDUFB4     | tan |
| ILMN_2159859 | LYSMD4     | tan |
| ILMN_2123119 | MFSD8      | tan |
| ILMN_1691946 | FAM173B    | tan |
| ILMN_1693401 | KLHL28     | tan |

|              |          |           |
|--------------|----------|-----------|
| ILMN_1689001 | CDK4     | tan       |
| ILMN_2087989 | ZFAND1   | tan       |
| ILMN_2107933 | ZNF285   | tan       |
| ILMN_1718629 | NRIP1    | tan       |
| ILMN_1729980 | RNF216   | tan       |
| ILMN_1715189 | LHX6     | tan       |
| ILMN_1680652 | SELENBP1 | tan       |
| ILMN_1803180 | PRDX6    | tan       |
| ILMN_1691567 | GNPDA2   | tan       |
| ILMN_1674661 | CIRBP    | tan       |
| ILMN_1714737 | ASF1A    | tan       |
| ILMN_1801383 | SMG1     | tan       |
| ILMN_1708009 | LANCL2   | tan       |
| ILMN_1807372 | ADORA2A  | tan       |
| ILMN_1741881 | C9orf72  | tan       |
| ILMN_1744665 | EP300    | tan       |
| ILMN_1708101 | LMNB2    | tan       |
| ILMN_1716973 | POLM     | tan       |
| ILMN_1704795 | MARK3    | tan       |
| ILMN_2227757 | PCDHB2   | tan       |
| ILMN_1704753 | EPAS1    | tan       |
| ILMN_2245305 | ABHD12   | tan       |
| ILMN_1751028 | SERPINH1 | tan       |
| ILMN_1772612 | ANGPTL2  | tan       |
| ILMN_1800425 | SLC9A1   | turquoise |
| ILMN_1701854 | GNG5     | turquoise |
| ILMN_1737588 | C21orf33 | turquoise |
| ILMN_1760441 | MRPS5    | turquoise |
| ILMN_2170209 | RASD2    | turquoise |
| ILMN_1802654 | GLT8D2   | turquoise |
| ILMN_2384536 | ECI2     | turquoise |
| ILMN_2391419 | SYNE2    | turquoise |
| ILMN_1763447 | PLXNB2   | turquoise |
| ILMN_1812926 | ANTXR2   | turquoise |
| ILMN_2403906 | ARFIP1   | turquoise |
| ILMN_1768394 | ARPC5    | turquoise |
| ILMN_1788778 | SEPT11   | turquoise |
| ILMN_1763540 | PSME4    | turquoise |
| ILMN_1778374 | BSG      | turquoise |
| ILMN_2121282 | MRPS18B  | turquoise |
| ILMN_2314007 | TCF12    | turquoise |
| ILMN_1651776 | FHOD1    | turquoise |
| ILMN_2082585 | SNAI2    | turquoise |
| ILMN_1800958 | TMEM237  | turquoise |
| ILMN_2347145 | DCN      | turquoise |

|              |              |           |
|--------------|--------------|-----------|
| ILMN_1765796 | ENO2         | turquoise |
| ILMN_1838863 | CCDC85C      | turquoise |
| ILMN_1670807 | FAM84B       | turquoise |
| ILMN_1688753 | PTDSS1       | turquoise |
| ILMN_1678781 | ARHGAP33     | turquoise |
| ILMN_1718044 | ELAC2        | turquoise |
| ILMN_1735779 | KCNJ8        | turquoise |
| ILMN_1684391 | PLOD1        | turquoise |
| ILMN_1797534 | RIOK1        | turquoise |
| ILMN_1705447 | AFG3L1P      | turquoise |
| ILMN_1803997 | SDCCAG3      | turquoise |
| ILMN_1780334 | KCNJ2        | turquoise |
| ILMN_2347622 | TRIM55       | turquoise |
| ILMN_1711270 | SUGP2        | turquoise |
| ILMN_1721712 | SYNGR1       | turquoise |
| ILMN_2370872 | GRINA        | turquoise |
| ILMN_1702861 | SGCD         | turquoise |
| ILMN_1690703 | LINC00478    | turquoise |
| ILMN_1669966 | NDUFS7       | turquoise |
| ILMN_1813925 | NOL3         | turquoise |
| ILMN_2207363 | RABAC1       | turquoise |
| ILMN_1779558 | GAS6         | turquoise |
| ILMN_1669788 | NUDT14       | turquoise |
| ILMN_1730229 | CGNL1        | turquoise |
| ILMN_1681325 | GLTPD1       | turquoise |
| ILMN_1730906 | FILIP1L      | turquoise |
| ILMN_1708778 | ASS1         | turquoise |
| ILMN_1750693 | SSR1         | turquoise |
| ILMN_1718607 | TSPAN4       | turquoise |
| ILMN_2060086 | ADAM23       | turquoise |
| ILMN_1737586 | EIF4H        | turquoise |
| ILMN_2386354 | CSNK2A1      | turquoise |
| ILMN_1739805 | NDE1         | turquoise |
| ILMN_1776151 | OLFML1       | turquoise |
| ILMN_1744912 | CTTN         | turquoise |
| ILMN_1683950 | SNX11        | turquoise |
| ILMN_1771964 | GSTA4        | turquoise |
| ILMN_2361695 | BAG5         | turquoise |
| ILMN_1747968 | RBM33        | turquoise |
| ILMN_1779706 | TP53BP2      | turquoise |
| ILMN_1753393 | OSGEP        | turquoise |
| ILMN_1801226 | DOCK6        | turquoise |
| ILMN_1654609 | EPB41L4A-AS1 | turquoise |
| ILMN_2327090 | MAEA         | turquoise |
| ILMN_1687887 | PSMC4        | turquoise |

|              |           |           |
|--------------|-----------|-----------|
| ILMN_2083333 | PMS2P5    | turquoise |
| ILMN_1739508 | IGKV1-9   | turquoise |
| ILMN_1720965 | TULP4     | turquoise |
| ILMN_2366634 | PKM       | turquoise |
| ILMN_1768812 | FXYD6     | turquoise |
| ILMN_1674629 | C9orf3    | turquoise |
| ILMN_1770048 | DPH5      | turquoise |
| ILMN_2154052 | KDSR      | turquoise |
| ILMN_1732089 | MRI1      | turquoise |
| ILMN_1734276 | PMEPA1    | turquoise |
| ILMN_1676197 | LRP11     | turquoise |
| ILMN_1806667 | FRAS1     | turquoise |
| ILMN_1778611 | GBAS      | turquoise |
| ILMN_1795778 | P4HA2     | turquoise |
| ILMN_1725534 | ACTN4     | turquoise |
| ILMN_1763007 | HIAT1     | turquoise |
| ILMN_1854469 | BICC1     | turquoise |
| ILMN_2399300 | NAV2      | turquoise |
| ILMN_2121207 | FAM125A   | turquoise |
| ILMN_1728605 | TTC3      | turquoise |
| ILMN_2044572 | TBC1D20   | turquoise |
| ILMN_1651496 | HIST1H2BD | turquoise |
| ILMN_1793474 | INSIG1    | turquoise |
| ILMN_1744210 | SDHA      | turquoise |
| ILMN_1755222 | CAAP1     | turquoise |
| ILMN_1788347 | KIAA1737  | turquoise |
| ILMN_1810910 | CFH       | turquoise |
| ILMN_2412281 | PDLIM5    | turquoise |
| ILMN_1737580 | DES11     | turquoise |
| ILMN_2197030 | ZFYVE21   | turquoise |
| ILMN_1719403 | MTX1      | turquoise |
| ILMN_1691410 | BAMBI     | turquoise |
| ILMN_1659524 | NDUFAF4   | turquoise |
| ILMN_2081398 | KIF3B     | turquoise |
| ILMN_1712430 | ATP5G1    | turquoise |
| ILMN_1788053 | SLC25A12  | turquoise |
| ILMN_2138765 | PLIN2     | turquoise |
| ILMN_1814924 | NXPE3     | turquoise |
| ILMN_1804351 | FZD7      | turquoise |
| ILMN_2290618 | SEC22C    | turquoise |
| ILMN_1758315 | SLC9A9    | turquoise |
| ILMN_1669377 | AP4B1     | turquoise |
| ILMN_2373632 | IDH3B     | turquoise |
| ILMN_1720838 | DECR1     | turquoise |
| ILMN_1744649 | PSMB5     | turquoise |

|              |           |           |
|--------------|-----------|-----------|
| ILMN_1790973 | CDS2      | turquoise |
| ILMN_1791119 | NDUFA10   | turquoise |
| ILMN_1663541 | B4GALT7   | turquoise |
| ILMN_1669259 | ANKRD49   | turquoise |
| ILMN_1693352 | MRPL20    | turquoise |
| ILMN_2199022 | SAP30BP   | turquoise |
| ILMN_2119945 | NDUFB3    | turquoise |
| ILMN_2383975 | PRDX5     | turquoise |
| ILMN_1761010 | PCCB      | turquoise |
| ILMN_1718633 | LRP5L     | turquoise |
| ILMN_2100458 | RFESD     | turquoise |
| ILMN_1724406 | INO80E    | turquoise |
| ILMN_2240866 | MASP1     | turquoise |
| ILMN_1750062 | PPARGC1A  | turquoise |
| ILMN_1670145 | DFNA5     | turquoise |
| ILMN_1739496 | PRRX1     | turquoise |
| ILMN_1722294 | CPNE8     | turquoise |
| ILMN_1758034 | ETFDH     | turquoise |
| ILMN_2217212 | ZNF564    | turquoise |
| ILMN_1767068 | SMAD6     | turquoise |
| ILMN_1806408 | ACADVL    | turquoise |
| ILMN_1665428 | GSDMD     | turquoise |
| ILMN_2077680 | CLDND2    | turquoise |
| ILMN_1770667 | HECA      | turquoise |
| ILMN_2128967 | C11orf1   | turquoise |
| ILMN_1660021 | PLIN3     | turquoise |
| ILMN_1810436 | DNAJC27   | turquoise |
| ILMN_1745152 | UQCC      | turquoise |
| ILMN_1672878 | ABR       | turquoise |
| ILMN_1743367 | FZD4      | turquoise |
| ILMN_1764186 | ATXN1L    | turquoise |
| ILMN_1665909 | LASP1     | turquoise |
| ILMN_1786273 | C1orf122  | turquoise |
| ILMN_1694603 | SMARCC1   | turquoise |
| ILMN_1839051 | FER       | turquoise |
| ILMN_1675239 | NDUFA7    | turquoise |
| ILMN_1789510 | STIP1     | turquoise |
| ILMN_1742187 | MAN1A1    | turquoise |
| ILMN_1702775 | LRP5      | turquoise |
| ILMN_2050023 | CCDC23    | turquoise |
| ILMN_1687768 | NCOA7     | turquoise |
| ILMN_1803745 | SUOX      | turquoise |
| ILMN_1777794 | PRKCSH    | turquoise |
| ILMN_1683277 | KIAA0319L | turquoise |
| ILMN_1654552 | MRPS31    | turquoise |

|              |           |           |
|--------------|-----------|-----------|
| ILMN_2365711 | SEPT2     | turquoise |
| ILMN_2404065 | APP       | turquoise |
| ILMN_1715661 | TFAM      | turquoise |
| ILMN_1651228 | RPS28     | turquoise |
| ILMN_1693311 | TMBIM6    | turquoise |
| ILMN_1674160 | BIN1      | turquoise |
| ILMN_1658290 | METTL22   | turquoise |
| ILMN_1778668 | TAGLN     | turquoise |
| ILMN_1789733 | CLIP3     | turquoise |
| ILMN_1797964 | ARL6IP6   | turquoise |
| ILMN_1778173 | AK3       | turquoise |
| ILMN_1815121 | PLAGL1    | turquoise |
| ILMN_1737025 | PLCL2     | turquoise |
| ILMN_1797298 | ARMC7     | turquoise |
| ILMN_1658437 | SFXN4     | turquoise |
| ILMN_1789166 | SHD       | turquoise |
| ILMN_1717056 | TXNRD1    | turquoise |
| ILMN_1778924 | PDE1A     | turquoise |
| ILMN_1713744 | C14orf132 | turquoise |
| ILMN_1740938 | APOE      | turquoise |
| ILMN_2127605 | LRP3      | turquoise |
| ILMN_2086105 | SPRY4     | turquoise |
| ILMN_1792110 | C10orf76  | turquoise |
| ILMN_1675803 | FAM200B   | turquoise |
| ILMN_1676563 | HTRA1     | turquoise |
| ILMN_2329914 | SPRY1     | turquoise |
| ILMN_1721770 | PAPPA     | turquoise |
| ILMN_1803818 | NMNAT2    | turquoise |
| ILMN_1665831 | CLPTM1    | turquoise |
| ILMN_1784186 | C1orf170  | turquoise |
| ILMN_2223380 | PPWD1     | turquoise |
| ILMN_1741300 | ZNF407    | turquoise |
| ILMN_2409167 | ANXA2     | turquoise |
| ILMN_1739222 | ETV5      | turquoise |
| ILMN_1677404 | RAP2A     | turquoise |
| ILMN_1721876 | TIMP2     | turquoise |
| ILMN_1671295 | CCDC3     | turquoise |
| ILMN_1801853 | DPY19L2   | turquoise |
| ILMN_1757106 | MARCH6    | turquoise |
| ILMN_1700695 | SLC44A1   | turquoise |
| ILMN_1664068 | ERGIC1    | turquoise |
| ILMN_2224031 | CETN3     | turquoise |
| ILMN_1675448 | ZFP36L1   | turquoise |
| ILMN_1683817 | UBE2Q2    | turquoise |
| ILMN_1685097 | ASCC1     | turquoise |

|              |         |           |
|--------------|---------|-----------|
| ILMN_1782538 | VIM     | turquoise |
| ILMN_2087080 | RPL5    | turquoise |
| ILMN_1684594 | USP24   | turquoise |
| ILMN_1740185 | TPMT    | turquoise |
| ILMN_1752075 | MYBPC1  | turquoise |
| ILMN_1763891 | SSC5D   | turquoise |
| ILMN_1672350 | JAM2    | turquoise |
| ILMN_1765872 | SIPA1L3 | turquoise |
| ILMN_1685088 | RPL36   | turquoise |
| ILMN_1780799 | ENPP2   | turquoise |
| ILMN_2345015 | PTGES2  | turquoise |
| ILMN_2205211 | PPIAP29 | turquoise |
| ILMN_1740170 | CHCHD10 | turquoise |
| ILMN_2214144 | TWSG1   | turquoise |
| ILMN_1753370 | ABTB2   | turquoise |
| ILMN_1703374 | NAV1    | turquoise |
| ILMN_1651958 | MGP     | turquoise |
| ILMN_1740900 | BMP4    | turquoise |
| ILMN_2067708 | TFB2M   | turquoise |
| ILMN_2155998 | PSMD6   | turquoise |
| ILMN_2351930 | TRIM33  | turquoise |
| ILMN_1811313 | SLIT3   | turquoise |
| ILMN_1686748 | TMEM9   | turquoise |
| ILMN_1767448 | LHFP    | turquoise |
| ILMN_1720542 | POLR2I  | turquoise |
| ILMN_1691376 | JAG1    | turquoise |
| ILMN_1721989 | ATP5F1  | turquoise |
| ILMN_1792825 | ARIH2   | turquoise |
| ILMN_1672080 | NR2F6   | turquoise |
| ILMN_1763147 | NDUFB6  | turquoise |
| ILMN_2096405 | WDR37   | turquoise |
| ILMN_1795251 | SPARCL1 | turquoise |
| ILMN_1729142 | CENPV   | turquoise |
| ILMN_2358626 | ADK     | turquoise |
| ILMN_1681526 | SLC5A1  | turquoise |
| ILMN_1659564 | SEC61A1 | turquoise |
| ILMN_1812902 | CYYR1   | turquoise |
| ILMN_2316540 | MRPL11  | turquoise |
| ILMN_1739594 | ACOT11  | turquoise |
| ILMN_1701441 | LPAR1   | turquoise |
| ILMN_2194577 | PLVAP   | turquoise |
| ILMN_2200659 | SNHG5   | turquoise |
| ILMN_1666727 | ZNF586  | turquoise |
| ILMN_1785158 | HERPUD2 | turquoise |
| ILMN_1811433 | RPL8    | turquoise |

|              |           |           |
|--------------|-----------|-----------|
| ILMN_1790761 | POSTN     | turquoise |
| ILMN_1654324 | HEYL      | turquoise |
| ILMN_1707156 | LRRFIP2   | turquoise |
| ILMN_2339835 | PTGS1     | turquoise |
| ILMN_1794132 | NDUFS8    | turquoise |
| ILMN_1764239 | PMPCA     | turquoise |
| ILMN_1652407 | ZMYND8    | turquoise |
| ILMN_1688534 | EIF2B5    | turquoise |
| ILMN_2149566 | VPS25     | turquoise |
| ILMN_1801441 | RFTN2     | turquoise |
| ILMN_1726204 | SCRG1     | turquoise |
| ILMN_1777644 | INPP5J    | turquoise |
| ILMN_2326071 | MYL6      | turquoise |
| ILMN_1653599 | ATP5D     | turquoise |
| ILMN_1769779 | PTP4A3    | turquoise |
| ILMN_1778681 | EBF1      | turquoise |
| ILMN_1795419 | CNPPD1    | turquoise |
| ILMN_1691884 | STC2      | turquoise |
| ILMN_1750969 | FAM120AOS | turquoise |
| ILMN_2066124 | AFG3L2    | turquoise |
| ILMN_1806122 | CHD8      | turquoise |
| ILMN_1671191 | UQCRC1    | turquoise |
| ILMN_2363392 | TNFSF14   | turquoise |
| ILMN_1718646 | MMP15     | turquoise |
| ILMN_1663512 | COX5B     | turquoise |
| ILMN_1682717 | IER3      | turquoise |
| ILMN_1751034 | ITPRIPL2  | turquoise |
| ILMN_1816342 | MTRNR2L1  | turquoise |
| ILMN_2147105 | NPIPL2    | turquoise |
| ILMN_1671603 | MED30     | turquoise |
| ILMN_1681972 | TMEM69    | turquoise |
| ILMN_1735680 | TMEM30A   | turquoise |
| ILMN_1669390 | PPP1R13L  | turquoise |
| ILMN_1660204 | IGSF9B    | turquoise |
| ILMN_1664294 | LEPRE1    | turquoise |
| ILMN_1765994 | ZBP1      | turquoise |
| ILMN_2350634 | EFEMP1    | turquoise |
| ILMN_1793990 | ID2       | turquoise |
| ILMN_1740604 | RAB11FIP5 | turquoise |
| ILMN_1800390 | ZNF511    | turquoise |
| ILMN_1800787 | RFTN1     | turquoise |
| ILMN_1657683 | C1orf198  | turquoise |
| ILMN_2214910 | EPHB4     | turquoise |
| ILMN_1660723 | RDH13     | turquoise |
| ILMN_1658420 | DSCAM     | turquoise |

|              |           |           |
|--------------|-----------|-----------|
| ILMN_1683313 | ST3GAL1   | turquoise |
| ILMN_1707124 | TFPI      | turquoise |
| ILMN_1659766 | BAG3      | turquoise |
| ILMN_1746819 | C5        | turquoise |
| ILMN_1788738 | ZNRF3     | turquoise |
| ILMN_1710873 | ZNF330    | turquoise |
| ILMN_2261784 | CCNY      | turquoise |
| ILMN_1733932 | SNUPN     | turquoise |
| ILMN_1651987 | CCDC167   | turquoise |
| ILMN_1654690 | CECR5     | turquoise |
| ILMN_1747099 | LUC7L2    | turquoise |
| ILMN_1703891 | TBC1D9    | turquoise |
| ILMN_1732426 | CRHR1     | turquoise |
| ILMN_1679232 | KIDINS220 | turquoise |
| ILMN_1805999 | MYO1D     | turquoise |
| ILMN_1805773 | ART4      | turquoise |
| ILMN_2220739 | TMCO3     | turquoise |
| ILMN_1808939 | RPS6      | turquoise |
| ILMN_2321292 | WIPI2     | turquoise |
| ILMN_1698233 | RWDD2B    | turquoise |
| ILMN_1769031 | MTOR      | turquoise |
| ILMN_1696657 | LRRN2     | turquoise |
| ILMN_1721626 | ARID5B    | turquoise |
| ILMN_1657983 | TERF2IP   | turquoise |
| ILMN_1693009 | FGL2      | turquoise |
| ILMN_1756755 | LINGO1    | turquoise |
| ILMN_2330948 | ARF1      | turquoise |
| ILMN_1758895 | CTSK      | turquoise |
| ILMN_1721535 | COG5      | turquoise |
| ILMN_1758311 | NET1      | turquoise |
| ILMN_1724811 | PARN      | turquoise |
| ILMN_1913060 | CMKLR1    | turquoise |
| ILMN_1719661 | MSRB1     | turquoise |
| ILMN_1719627 | SLC27A3   | turquoise |
| ILMN_1732452 | MAPKAPK3  | turquoise |
| ILMN_1730019 | BRD1      | turquoise |
| ILMN_1720865 | OSBPL7    | turquoise |
| ILMN_1748281 | MAPK10    | turquoise |
| ILMN_1723978 | LGALS1    | turquoise |
| ILMN_1693220 | AKAP11    | turquoise |
| ILMN_2377496 | ERCC1     | turquoise |
| ILMN_2364131 | TTPAL     | turquoise |
| ILMN_1784717 | RPS19     | turquoise |
| ILMN_1807600 | NPLOC4    | turquoise |
| ILMN_1745282 | MOK       | turquoise |

|              |          |           |
|--------------|----------|-----------|
| ILMN_1709880 | RPLP0    | turquoise |
| ILMN_1675038 | PRMT2    | turquoise |
| ILMN_1736481 | SECISBP2 | turquoise |
| ILMN_1758674 | EMC6     | turquoise |
| ILMN_1709817 | SLC35A5  | turquoise |
| ILMN_2344956 | ACP1     | turquoise |
| ILMN_1737585 | VAR52    | turquoise |
| ILMN_1815682 | C3orf37  | turquoise |
| ILMN_1698072 | PITRM1   | turquoise |
| ILMN_1814247 | TCFL5    | turquoise |
| ILMN_2390162 | PHF11    | turquoise |
| ILMN_1683059 | SIRT5    | turquoise |
| ILMN_1745697 | MGRN1    | turquoise |
| ILMN_1723895 | GTF3C5   | turquoise |
| ILMN_2087702 | MYH9     | turquoise |
| ILMN_2123402 | CNPY2    | turquoise |
| ILMN_1793578 | ZFP37    | turquoise |
| ILMN_2155719 | NBPF10   | turquoise |
| ILMN_2212714 | TMEM39B  | turquoise |
| ILMN_1656691 | FBXO4    | turquoise |
| ILMN_1764489 | TBL2     | turquoise |
| ILMN_1683148 | PRICKLE2 | turquoise |
| ILMN_1697820 | HINT2    | turquoise |
| ILMN_1876924 | WNK1     | turquoise |
| ILMN_1703335 | LACTB    | turquoise |
| ILMN_1742379 | IFT122   | turquoise |
| ILMN_1671486 | HOMER2   | turquoise |
| ILMN_1782419 | GNG11    | turquoise |
| ILMN_1813389 | MRPS7    | turquoise |
| ILMN_1814316 | RBFOX1   | turquoise |
| ILMN_2098743 | ACOT13   | turquoise |
| ILMN_1705750 | TGM2     | turquoise |
| ILMN_1770479 | LMO7     | turquoise |
| ILMN_1659017 | C11orf74 | turquoise |
| ILMN_1677376 | CHD7     | turquoise |
| ILMN_1757521 | CKM      | turquoise |
| ILMN_1726603 | ATP5I    | turquoise |
| ILMN_1789616 | NUPL2    | turquoise |
| ILMN_1674032 | ABCD3    | turquoise |
| ILMN_1807969 | SNCAIP   | turquoise |
| ILMN_1784110 | CDK18    | turquoise |
| ILMN_1760798 | RYR2     | turquoise |
| ILMN_1678490 | RILPL2   | turquoise |
| ILMN_1670000 | DCAF6    | turquoise |
| ILMN_1763198 | STAT6    | turquoise |

|              |           |           |
|--------------|-----------|-----------|
| ILMN_1774272 | ESRRA     | turquoise |
| ILMN_2208413 | ARHGAP15  | turquoise |
| ILMN_1733103 | LINC00174 | turquoise |
| ILMN_1749667 | OBSCN     | turquoise |
| ILMN_1695829 | TTYH2     | turquoise |
| ILMN_1660519 | C3orf70   | turquoise |
| ILMN_1758067 | RGS4      | turquoise |
| ILMN_1756355 | NDUFS3    | turquoise |
| ILMN_1808404 | RHBDF1    | turquoise |
| ILMN_1703301 | MRPL45P2  | turquoise |
| ILMN_2319994 | RPL3      | turquoise |
| ILMN_1789639 | FMOD      | turquoise |
| ILMN_1743104 | RBM4B     | turquoise |
| ILMN_1804490 | PRKRIP1   | turquoise |
| ILMN_1778203 | CLN5      | turquoise |
| ILMN_1651799 | SLC38A2   | turquoise |
| ILMN_2108339 | THUMPD1   | turquoise |
| ILMN_1719581 | MYOM3     | turquoise |
| ILMN_1657746 | BPHL      | turquoise |
| ILMN_1683475 | TOMM40    | turquoise |
| ILMN_2173004 | RAB8B     | turquoise |
| ILMN_1716056 | LMF2      | turquoise |
| ILMN_1791483 | PDE4D     | turquoise |
| ILMN_2226304 | ANKRD50   | turquoise |
| ILMN_1741356 | PRICKLE1  | turquoise |
| ILMN_1810836 | PDE5A     | turquoise |
| ILMN_1731720 | PDRG1     | turquoise |
| ILMN_1815115 | CYC1      | turquoise |
| ILMN_1815154 | MYH10     | turquoise |
| ILMN_1739946 | VKORC1    | turquoise |
| ILMN_1709623 | MAPK7     | turquoise |
| ILMN_1693108 | RUVBL1    | turquoise |
| ILMN_1753467 | SAMD4B    | turquoise |
| ILMN_1801766 | CCDC109B  | turquoise |
| ILMN_1665696 | EFNA4     | turquoise |
| ILMN_1772731 | HAGH      | turquoise |
| ILMN_1719749 | PTGES3    | turquoise |
| ILMN_1656285 | METTL7A   | turquoise |
| ILMN_1780598 | PIAS1     | turquoise |
| ILMN_1815635 | C9orf62   | turquoise |
| ILMN_2279339 | WTAP      | turquoise |
| ILMN_1769633 | CTSO      | turquoise |
| ILMN_1664464 | PTGDS     | turquoise |
| ILMN_1787919 | PARVB     | turquoise |
| ILMN_1811754 | NDUFB10   | turquoise |

|              |         |           |
|--------------|---------|-----------|
| ILMN_1853876 | TMEM64  | turquoise |
| ILMN_2308689 | AGBL5   | turquoise |
| ILMN_1715931 | ISCA1   | turquoise |
| ILMN_2371964 | MRPS12  | turquoise |
| ILMN_1754149 | LETMD1  | turquoise |
| ILMN_2366710 | UQCR10  | turquoise |
| ILMN_1807359 | CLEC11A | turquoise |
| ILMN_1736548 | PHACTR4 | turquoise |
| ILMN_1737475 | ABHD11  | turquoise |
| ILMN_1707627 | TPI1    | turquoise |
| ILMN_1753547 | STAT5A  | turquoise |
| ILMN_2160764 | HBP1    | turquoise |
| ILMN_2153485 | NMNAT3  | turquoise |
| ILMN_1680675 | MRRF    | turquoise |
| ILMN_2345739 | CAPRIN2 | turquoise |
| ILMN_2366246 | SEC23B  | turquoise |
| ILMN_2206474 | SYNDIG1 | turquoise |
| ILMN_1658911 | AP3S1   | turquoise |
| ILMN_1779448 | EFHD1   | turquoise |
| ILMN_1745343 | ZMAT2   | turquoise |
| ILMN_1713985 | MAF1    | turquoise |
| ILMN_1809027 | ATP5SL  | turquoise |
| ILMN_1690282 | CRADD   | turquoise |
| ILMN_1752481 | COX6A2  | turquoise |
| ILMN_1800889 | FIG4    | turquoise |
| ILMN_1788547 | GCLM    | turquoise |
| ILMN_2189222 | KLHL8   | turquoise |
| ILMN_1783469 | FAM82B  | turquoise |
| ILMN_1669252 | CUL2    | turquoise |
| ILMN_2324584 | HFE2    | turquoise |
| ILMN_1655876 | TMEM159 | turquoise |
| ILMN_1805636 | PGAP3   | turquoise |
| ILMN_1764500 | BRK1    | turquoise |
| ILMN_1757237 | ASAP2   | turquoise |
| ILMN_2075818 | ZNF598  | turquoise |
| ILMN_1763828 | MTF1    | turquoise |
| ILMN_1796165 | GLRX5   | turquoise |
| ILMN_1663664 | MRPS10  | turquoise |
| ILMN_1658425 | DAG1    | turquoise |
| ILMN_1712577 | FAM174A | turquoise |
| ILMN_2330994 | NKTR    | turquoise |
| ILMN_1806634 | NNT     | turquoise |
| ILMN_1680714 | LIG4    | turquoise |
| ILMN_2214955 | CCDC127 | turquoise |
| ILMN_1706734 | ZNF451  | turquoise |

|              |          |           |
|--------------|----------|-----------|
| ILMN_1780769 | TUBB4B   | turquoise |
| ILMN_1797735 | C1orf21  | turquoise |
| ILMN_1800008 | ACAT1    | turquoise |
| ILMN_1707551 | AFMID    | turquoise |
| ILMN_2324998 | NGDN     | turquoise |
| ILMN_1703015 | ZRANB2   | turquoise |
| ILMN_1708107 | DPT      | turquoise |
| ILMN_1783846 | RAPH1    | turquoise |
| ILMN_2336609 | SYTL2    | turquoise |
| ILMN_1652722 | C14orf2  | turquoise |
| ILMN_2285112 | FBXO11   | turquoise |
| ILMN_1809850 | RCN3     | turquoise |
| ILMN_1730082 | RPUSD4   | turquoise |
| ILMN_1773079 | COL3A1   | turquoise |
| ILMN_1714510 | ZNF192P1 | turquoise |
| ILMN_1875342 | LNPEP    | turquoise |
| ILMN_1795342 | MLPH     | turquoise |
| ILMN_1658624 | UBXN6    | turquoise |
| ILMN_1714428 | FBXO17   | turquoise |
| ILMN_1751984 | PRKAG1   | turquoise |
| ILMN_1651826 | BASP1    | turquoise |
| ILMN_1720270 | CDR2     | turquoise |
| ILMN_1706057 | CS       | turquoise |
| ILMN_1754912 | GLE1     | turquoise |
| ILMN_2406043 | CHMP3    | turquoise |
| ILMN_1698307 | DBNL     | turquoise |
| ILMN_1797776 | PRSS23   | turquoise |
| ILMN_2307032 | OSBPL5   | turquoise |
| ILMN_1676588 | CEPT1    | turquoise |
| ILMN_2355042 | CLUAP1   | turquoise |
| ILMN_2383516 | WDR7     | turquoise |
| ILMN_1767475 | CERK     | turquoise |
| ILMN_1713892 | C4orf34  | turquoise |
| ILMN_1765520 | MTIF2    | turquoise |
| ILMN_1709809 | NHP2L1   | turquoise |
| ILMN_1795922 | ZNF830   | turquoise |
| ILMN_1664802 | WSB1     | turquoise |
| ILMN_1706326 | MRPL33   | turquoise |
| ILMN_1758825 | ABLIM2   | turquoise |
| ILMN_1729112 | CHPT1    | turquoise |
| ILMN_2386973 | PKP2     | turquoise |
| ILMN_1767139 | NDUFA13  | turquoise |
| ILMN_1746492 | IFT27    | turquoise |
| ILMN_1804479 | MRPL18   | turquoise |
| ILMN_2407434 | DCLK2    | turquoise |

|              |           |           |
|--------------|-----------|-----------|
| ILMN_2094061 | IMPA2     | turquoise |
| ILMN_2115633 | CD320     | turquoise |
| ILMN_1768719 | RDH11     | turquoise |
| ILMN_1766309 | ANKRD54   | turquoise |
| ILMN_2234709 | C12orf60  | turquoise |
| ILMN_1733562 | TFB1M     | turquoise |
| ILMN_1731742 | TNFRSF13C | turquoise |
| ILMN_1727220 | CRNN      | turquoise |
| ILMN_2182148 | CNRIP1    | turquoise |
| ILMN_1804283 | GNAS      | turquoise |
| ILMN_1760802 | MRE11A    | turquoise |
| ILMN_2405642 | DHDDS     | turquoise |
| ILMN_1682034 | HEY2      | turquoise |
| ILMN_2341690 | C17orf81  | turquoise |
| ILMN_1745798 | GTF2F2    | turquoise |
| ILMN_1715789 | DOCK1     | turquoise |
| ILMN_2334693 | NARF      | turquoise |
| ILMN_1690982 | DDT       | turquoise |
| ILMN_1788810 | NAA25     | turquoise |
| ILMN_2082314 | TOM1      | turquoise |
| ILMN_2337241 | RPS15A    | turquoise |
| ILMN_2087692 | CYBRD1    | turquoise |
| ILMN_1745607 | A2M       | turquoise |
| ILMN_1801043 | GSN       | turquoise |
| ILMN_1790909 | NFE2L2    | turquoise |
| ILMN_1777220 | VCP       | turquoise |
| ILMN_1707350 | TUSC1     | turquoise |
| ILMN_1708537 | RBPJ      | turquoise |
| ILMN_1786024 | POLR3H    | turquoise |
| ILMN_1763011 | C7orf10   | turquoise |
| ILMN_1706643 | COL6A3    | turquoise |
| ILMN_1738866 | DEXI      | turquoise |
| ILMN_1807972 | MICAL1    | turquoise |
| ILMN_2316599 | ZNF629    | turquoise |
| ILMN_2060115 | SORL1     | turquoise |
| ILMN_1777915 | STX6      | turquoise |
| ILMN_1680091 | POP7      | turquoise |
| ILMN_1693210 | NSMCE2    | turquoise |
| ILMN_1667948 | SPATA18   | turquoise |
| ILMN_1790529 | LUM       | turquoise |
| ILMN_1668374 | ITGB5     | turquoise |
| ILMN_1775823 | POFUT2    | turquoise |
| ILMN_1811598 | ADH1B     | turquoise |
| ILMN_1764970 | JMJD1C    | turquoise |
| ILMN_1703244 | MAP1LC3B  | turquoise |

|              |          |           |
|--------------|----------|-----------|
| ILMN_1725705 | CLPP     | turquoise |
| ILMN_1685433 | COL8A1   | turquoise |
| ILMN_2348090 | MRPL55   | turquoise |
| ILMN_1698605 | TMEM43   | turquoise |
| ILMN_1814194 | TCF4     | turquoise |
| ILMN_1677953 | OGFOD1   | turquoise |
| ILMN_1810797 | WASF3    | turquoise |
| ILMN_1728057 | C6orf57  | turquoise |
| ILMN_1667977 | TAF1B    | turquoise |
| ILMN_1702363 | SULF1    | turquoise |
| ILMN_1714700 | TRIB2    | turquoise |
| ILMN_2364864 | MB       | turquoise |
| ILMN_1721283 | HSPB6    | turquoise |
| ILMN_1678842 | THBS2    | turquoise |
| ILMN_2104924 | FAM207A  | turquoise |
| ILMN_1764207 | RPRD1A   | turquoise |
| ILMN_1700690 | VAT1     | turquoise |
| ILMN_1666364 | COQ10A   | turquoise |
| ILMN_1778478 | CCDC28B  | turquoise |
| ILMN_2310814 | MAPT     | turquoise |
| ILMN_1809467 | VAMP5    | turquoise |
| ILMN_1688526 | ARL5A    | turquoise |
| ILMN_1719641 | SMOC2    | turquoise |
| ILMN_1722583 | EMC8     | turquoise |
| ILMN_1764629 | SLC39A14 | turquoise |
| ILMN_1658709 | LAMB1    | turquoise |
| ILMN_1696749 | LMNA     | turquoise |
| ILMN_1343295 | GAPDH    | turquoise |
| ILMN_1736700 | ALDOA    | turquoise |
| ILMN_1697200 | MON2     | turquoise |
| ILMN_1678629 | DOCK7    | turquoise |
| ILMN_1718961 | BNIP3L   | turquoise |
| ILMN_2375879 | VEGFA    | turquoise |
| ILMN_1696099 | ALDH4A1  | turquoise |
| ILMN_1812934 | DIDO1    | turquoise |
| ILMN_1695792 | CUL4A    | turquoise |
| ILMN_1810172 | SFRP4    | turquoise |
| ILMN_1761808 | MCFD2    | turquoise |
| ILMN_1657478 | MAGEL2   | turquoise |
| ILMN_1764609 | PWWP2B   | turquoise |
| ILMN_1737604 | FGGY     | turquoise |
| ILMN_1658957 | DDX11L1  | turquoise |
| ILMN_2379375 | PPP1R12B | turquoise |
| ILMN_1672611 | CDH11    | turquoise |
| ILMN_1742025 | OLFM1    | turquoise |

|              |          |           |
|--------------|----------|-----------|
| ILMN_2234956 | LEPR     | turquoise |
| ILMN_1743130 | PTGFRN   | turquoise |
| ILMN_1682938 | ARF3     | turquoise |
| ILMN_1675979 | RBMS3    | turquoise |
| ILMN_1687359 | MRPS23   | turquoise |
| ILMN_1802553 | MRPS24   | turquoise |
| ILMN_1763695 | C9orf24  | turquoise |
| ILMN_1783231 | PLEKHB1  | turquoise |
| ILMN_1701998 | AFAP1    | turquoise |
| ILMN_1770035 | NCOA5    | turquoise |
| ILMN_1728331 | ACPT     | turquoise |
| ILMN_1716062 | MYL4     | turquoise |
| ILMN_1759030 | MAP4K5   | turquoise |
| ILMN_2306033 | PRAME    | turquoise |
| ILMN_1675612 | BLCAP    | turquoise |
| ILMN_2247594 | RPLP1    | turquoise |
| ILMN_2044927 | RNF5     | turquoise |
| ILMN_2326737 | PPIE     | turquoise |
| ILMN_1663119 | DSC2     | turquoise |
| ILMN_1743049 | PWP1     | turquoise |
| ILMN_2112493 | DAP      | turquoise |
| ILMN_1731596 | AP3S2    | turquoise |
| ILMN_2160727 | CYTH3    | turquoise |
| ILMN_1785179 | UBE2G2   | turquoise |
| ILMN_1801378 | COQ3     | turquoise |
| ILMN_1667086 | AP3M1    | turquoise |
| ILMN_1701855 | PPP1CC   | turquoise |
| ILMN_1734744 | CDH19    | turquoise |
| ILMN_2232520 | ANKRD28  | turquoise |
| ILMN_2119692 | CSAD     | turquoise |
| ILMN_2329834 | RBM12    | turquoise |
| ILMN_1770641 | KLHL3    | turquoise |
| ILMN_1672834 | SSH2     | turquoise |
| ILMN_1753782 | ZNF266   | turquoise |
| ILMN_2323385 | TRIM4    | turquoise |
| ILMN_2064606 | TBC1D2B  | turquoise |
| ILMN_1732725 | PPP6R3   | turquoise |
| ILMN_1759184 | C19orf48 | turquoise |
| ILMN_1667295 | VASN     | turquoise |
| ILMN_1776777 | ADAR     | turquoise |
| ILMN_1722309 | ENDOG    | turquoise |
| ILMN_1763036 | CLCN6    | turquoise |
| ILMN_1701386 | STRADB   | turquoise |
| ILMN_2387105 | OGN      | turquoise |
| ILMN_1700268 | QPRT     | turquoise |

|              |          |           |
|--------------|----------|-----------|
| ILMN_1770084 | TACC1    | turquoise |
| ILMN_2404385 | REPIN1   | turquoise |
| ILMN_2073592 | CAND2    | turquoise |
| ILMN_1781514 | PCDH17   | turquoise |
| ILMN_1777906 | MAP7D1   | turquoise |
| ILMN_1761560 | PHF13    | turquoise |
| ILMN_1733756 | COL12A1  | turquoise |
| ILMN_1791576 | CHSY1    | turquoise |
| ILMN_1754272 | GINS3    | turquoise |
| ILMN_1766914 | MFAP4    | turquoise |
| ILMN_1667016 | FAF1     | turquoise |
| ILMN_2393450 | INF2     | turquoise |
| ILMN_1739942 | FAM117B  | turquoise |
| ILMN_2319344 | APEX1    | turquoise |
| ILMN_1677723 | ANGPT1   | turquoise |
| ILMN_2065745 | RAMP3    | turquoise |
| ILMN_1789999 | SLC30A7  | turquoise |
| ILMN_1737992 | CRAT     | turquoise |
| ILMN_1807136 | CROCCP2  | turquoise |
| ILMN_1669310 | RHOT2    | turquoise |
| ILMN_2097954 | TSFM     | turquoise |
| ILMN_2399392 | SIL1     | turquoise |
| ILMN_1681949 | PDGFRA   | turquoise |
| ILMN_1795893 | TMEM167B | turquoise |
| ILMN_2190414 | ZNF83    | turquoise |
| ILMN_1707199 | WDR20    | turquoise |
| ILMN_1652806 | ATP5J    | turquoise |
| ILMN_1713990 | TRIP6    | turquoise |
| ILMN_1795906 | PCBD1    | turquoise |
| ILMN_1794085 | PPP6R1   | turquoise |
| ILMN_1757882 | PPP1R16A | turquoise |
| ILMN_1736911 | TMOD1    | turquoise |
| ILMN_1810289 | MYOF     | turquoise |
| ILMN_1661755 | FAM129B  | turquoise |
| ILMN_1781680 | DAP3     | turquoise |
| ILMN_2186877 | EBLN2    | turquoise |
| ILMN_1671116 | XXYLT1   | turquoise |
| ILMN_1684289 | PNPO     | turquoise |
| ILMN_1782579 | IMMT     | turquoise |
| ILMN_1708369 | EPS15L1  | turquoise |
| ILMN_2410975 | ATG9A    | turquoise |
| ILMN_1786328 | DCAF12   | turquoise |
| ILMN_1800897 | NRD1     | turquoise |
| ILMN_1782385 | POLR2A   | turquoise |
| ILMN_1669669 | KCMF1    | turquoise |

|              |            |           |
|--------------|------------|-----------|
| ILMN_2395932 | UNC45A     | turquoise |
| ILMN_1810488 | NFYC       | turquoise |
| ILMN_1672229 | FGF12      | turquoise |
| ILMN_1779163 | C11orf67   | turquoise |
| ILMN_1794707 | ATHL1      | turquoise |
| ILMN_1761764 | ALKBH7     | turquoise |
| ILMN_2053178 | ACTG1      | turquoise |
| ILMN_1689070 | COQ7       | turquoise |
| ILMN_1679483 | INTS10     | turquoise |
| ILMN_1676026 | MRPS26     | turquoise |
| ILMN_1758173 | TMEM99     | turquoise |
| ILMN_1687501 | MOXD1      | turquoise |
| ILMN_1759792 | CLIP4      | turquoise |
| ILMN_1681304 | PAN3       | turquoise |
| ILMN_1690826 | TNKS1BP1   | turquoise |
| ILMN_2061435 | MEG3       | turquoise |
| ILMN_1710752 | NAPRT1     | turquoise |
| ILMN_1815634 | COX4I2     | turquoise |
| ILMN_1688423 | FCER1A     | turquoise |
| ILMN_1738684 | NRXN2      | turquoise |
| ILMN_1690761 | SURF4      | turquoise |
| ILMN_1716246 | FRZB       | turquoise |
| ILMN_2148469 | RASL11B    | turquoise |
| ILMN_1791890 | SPON1      | turquoise |
| ILMN_1764309 | ADH1A      | turquoise |
| ILMN_2230178 | DAND5      | turquoise |
| ILMN_1734483 | BSDC1      | turquoise |
| ILMN_1777526 | MED20      | turquoise |
| ILMN_1774982 | CDC42EP5   | turquoise |
| ILMN_2343010 | BOLA3      | turquoise |
| ILMN_1794157 | CATSPER2P1 | turquoise |
| ILMN_1812571 | RAB35      | turquoise |
| ILMN_2225144 | EIF4E3     | turquoise |
| ILMN_1706959 | TIMM22     | turquoise |
| ILMN_1801852 | SEC61B     | turquoise |
| ILMN_1783909 | COL6A2     | turquoise |
| ILMN_1768809 | ZNF134     | turquoise |
| ILMN_1761084 | FNDC5      | turquoise |
| ILMN_2325574 | CASC4      | turquoise |
| ILMN_1758806 | C21orf2    | turquoise |
| ILMN_1772644 | EML3       | turquoise |
| ILMN_1754103 | CLDN11     | turquoise |
| ILMN_2062468 | IGFBP7     | turquoise |
| ILMN_1772796 | DYNLL2     | turquoise |
| ILMN_1728845 | SMARCD1    | turquoise |

|              |            |           |
|--------------|------------|-----------|
| ILMN_1676448 | WDFY1      | turquoise |
| ILMN_1680703 | MRPS15     | turquoise |
| ILMN_1714577 | OGDHL      | turquoise |
| ILMN_1807095 | MRPS36     | turquoise |
| ILMN_1748831 | PPP1R13B   | turquoise |
| ILMN_1720941 | EVC        | turquoise |
| ILMN_2307598 | SLC37A3    | turquoise |
| ILMN_2406501 | SOD2       | turquoise |
| ILMN_1696127 | KIAA0240   | turquoise |
| ILMN_1703132 | LYRM2      | turquoise |
| ILMN_1684446 | SPAG7      | turquoise |
| ILMN_1728403 | C21orf119  | turquoise |
| ILMN_1677237 | CHCHD2P9   | turquoise |
| ILMN_1657682 | GFM1       | turquoise |
| ILMN_1687080 | EEF1A1P27  | turquoise |
| ILMN_1677347 | MTUS2      | turquoise |
| ILMN_1658110 | FAM210A    | turquoise |
| ILMN_1759948 | RNF5P1     | turquoise |
| ILMN_1712687 | PAK2       | turquoise |
| ILMN_1764410 | C22orf13   | turquoise |
| ILMN_1672128 | ATF4       | turquoise |
| ILMN_1749115 | RTN2       | turquoise |
| ILMN_1658504 | CHKA       | turquoise |
| ILMN_1743103 | SH3PXD2A   | turquoise |
| ILMN_1690690 | SEC23IP    | turquoise |
| ILMN_1844919 | EBF2       | turquoise |
| ILMN_2321064 | BAX        | turquoise |
| ILMN_1805395 | LTBP3      | turquoise |
| ILMN_1753468 | CD63       | turquoise |
| ILMN_1804448 | MSI2       | turquoise |
| ILMN_1738921 | ACAA1      | turquoise |
| ILMN_1735045 | A4GALT     | turquoise |
| ILMN_1765371 | LUC7L      | turquoise |
| ILMN_1740920 | ACADSB     | turquoise |
| ILMN_1803005 | MMACHC     | turquoise |
| ILMN_1671933 | GPSM2      | turquoise |
| ILMN_1665192 | NUDT6      | turquoise |
| ILMN_2371055 | EFNA1      | turquoise |
| ILMN_1756541 | MXD4       | turquoise |
| ILMN_1781638 | HDDC3      | turquoise |
| ILMN_1674522 | HIGD1A     | turquoise |
| ILMN_1730048 | C7orf26    | turquoise |
| ILMN_1773850 | FXC1       | turquoise |
| ILMN_1691736 | ST6GALNAC6 | turquoise |
| ILMN_1779014 | TSPYL1     | turquoise |

|              |          |           |
|--------------|----------|-----------|
| ILMN_1716730 | BOD1     | turquoise |
| ILMN_1786598 | COL14A1  | turquoise |
| ILMN_2346727 | MTUS1    | turquoise |
| ILMN_1676893 | ADCY3    | turquoise |
| ILMN_1654109 | EGFLAM   | turquoise |
| ILMN_1766675 | CDH6     | turquoise |
| ILMN_1680774 | NLRP1    | turquoise |
| ILMN_1793615 | ME3      | turquoise |
| ILMN_1745148 | ZNFX1    | turquoise |
| ILMN_1698001 | NCK1     | turquoise |
| ILMN_1729281 | SPHK2    | turquoise |
| ILMN_2200503 | NIT2     | turquoise |
| ILMN_1809859 | PCGF2    | turquoise |
| ILMN_1764266 | CKMT2    | turquoise |
| ILMN_1788742 | RPL35P5  | turquoise |
| ILMN_1759453 | UQCRB    | turquoise |
| ILMN_1738116 | TMEM119  | turquoise |
| ILMN_1755862 | PFAS     | turquoise |
| ILMN_2103919 | LRFN3    | turquoise |
| ILMN_1780132 | PELI2    | turquoise |
| ILMN_1788099 | LSM4     | turquoise |
| ILMN_1733831 | PGBD5    | turquoise |
| ILMN_1811104 | POGLUT1  | turquoise |
| ILMN_2412046 | TRIM54   | turquoise |
| ILMN_1688089 | PEBP1    | turquoise |
| ILMN_1813938 | CHCHD4   | turquoise |
| ILMN_2231021 | TMEM185B | turquoise |
| ILMN_1701918 | KLHDC9   | turquoise |
| ILMN_1790881 | HNMT     | turquoise |
| ILMN_1729868 | SPRYD4   | turquoise |
| ILMN_1791447 | CXCL12   | turquoise |
| ILMN_1789338 | SORBS3   | turquoise |
| ILMN_1674874 | MFS10    | turquoise |
| ILMN_1663751 | CYCSP55  | turquoise |
| ILMN_1678362 | INO80    | turquoise |
| ILMN_1706305 | COX16    | turquoise |
| ILMN_2360784 | RRBP1    | turquoise |
| ILMN_1753890 | IFT20    | turquoise |
| ILMN_2160005 | NUMA1    | turquoise |
| ILMN_2346997 | RAB23    | turquoise |
| ILMN_1670901 | COX10    | turquoise |
| ILMN_1775939 | SF3B2    | turquoise |
| ILMN_2215640 | TUBA3D   | turquoise |
| ILMN_1689828 | DMPK     | turquoise |
| ILMN_1756402 | TMEM177  | turquoise |

|              |           |           |
|--------------|-----------|-----------|
| ILMN_1760727 | ANG       | turquoise |
| ILMN_1676891 | CDK19     | turquoise |
| ILMN_2364072 | CLCNKA    | turquoise |
| ILMN_1654861 | ACO2      | turquoise |
| ILMN_1656628 | WDR4      | turquoise |
| ILMN_1780663 | KLHL30    | turquoise |
| ILMN_2339028 | PKD1      | turquoise |
| ILMN_1763265 | CHMP1B    | turquoise |
| ILMN_1769601 | TBCK      | turquoise |
| ILMN_1808217 | PPP1R1C   | turquoise |
| ILMN_2234873 | NME1-NME2 | turquoise |
| ILMN_1708203 | OTUD4     | turquoise |
| ILMN_1765109 | TNFRSF25  | turquoise |
| ILMN_1695827 | PPP1CA    | turquoise |
| ILMN_1730294 | INO80C    | turquoise |
| ILMN_2163796 | RABGGTB   | turquoise |
| ILMN_1661653 | DET1      | turquoise |
| ILMN_1789505 | ITPR1     | turquoise |
| ILMN_1664071 | TNNT2     | turquoise |
| ILMN_1849013 | IL6ST     | turquoise |
| ILMN_1784427 | MYH7B     | turquoise |
| ILMN_1761969 | DERL2     | turquoise |
| ILMN_1772651 | CNOT2     | turquoise |
| ILMN_1672356 | ANKRD13D  | turquoise |
| ILMN_1773716 | MRPL9     | turquoise |
| ILMN_1657199 | NFASC     | turquoise |
| ILMN_1742382 | RIMS3     | turquoise |
| ILMN_1674394 | C20orf3   | turquoise |
| ILMN_1738821 | GOLGA2    | turquoise |
| ILMN_1779639 | IRAK1BP1  | turquoise |
| ILMN_2327860 | MAL       | turquoise |
| ILMN_1785272 | COL1A2    | turquoise |
| ILMN_1758457 | TBC1D16   | turquoise |
| ILMN_1660635 | LACTB2    | turquoise |
| ILMN_1716733 | MYOM2     | turquoise |
| ILMN_1808587 | ZFHX3     | turquoise |
| ILMN_1740861 | DTWD1     | turquoise |
| ILMN_1651680 | EEF1A1P12 | turquoise |
| ILMN_1688630 | RECK      | turquoise |
| ILMN_1652379 | SUCLG2    | turquoise |
| ILMN_1763638 | BCAR3     | turquoise |
| ILMN_1757338 | PLSCR4    | turquoise |
| ILMN_1732750 | CHCHD8    | turquoise |
| ILMN_1683927 | ITGAE     | turquoise |
| ILMN_1812461 | WISP2     | turquoise |

|              |           |           |
|--------------|-----------|-----------|
| ILMN_1657144 | IBA57     | turquoise |
| ILMN_1671478 | CKB       | turquoise |
| ILMN_1779616 | SUCLG1    | turquoise |
| ILMN_1771333 | CD47      | turquoise |
| ILMN_1704196 | DSG2      | turquoise |
| ILMN_1790689 | CRISPLD2  | turquoise |
| ILMN_2089167 | RHOD      | turquoise |
| ILMN_1693685 | LINC00116 | turquoise |
| ILMN_1751258 | NDUFA4    | turquoise |
| ILMN_2407824 | ATP1B1    | turquoise |
| ILMN_1718309 | COX15     | turquoise |
| ILMN_1691578 | GTF3C6    | turquoise |
| ILMN_1742031 | IFRD2     | turquoise |
| ILMN_1787109 | CLK2      | turquoise |
| ILMN_1712431 | PCED1B    | turquoise |
| ILMN_2054392 | PPIL1     | turquoise |
| ILMN_1725193 | IGFBP2    | turquoise |
| ILMN_1658289 | WDR54     | turquoise |
| ILMN_1652024 | CSNK1G3   | turquoise |
| ILMN_2174369 | ELOVL5    | turquoise |
| ILMN_1880012 | SEMA5A    | turquoise |
| ILMN_1741780 | DUSP28    | turquoise |
| ILMN_2361603 | NDRG2     | turquoise |
| ILMN_1836309 | MCF2L-AS1 | turquoise |
| ILMN_1810420 | DYSF      | turquoise |
| ILMN_1719290 | CRYZL1    | turquoise |
| ILMN_2129927 | EXT1      | turquoise |
| ILMN_2203891 | SMAD7     | turquoise |
| ILMN_1768551 | PATL2     | turquoise |
| ILMN_1805466 | SOX9      | turquoise |
| ILMN_1694888 | TAF2      | turquoise |
| ILMN_1800602 | GCA       | turquoise |
| ILMN_2370825 | ATM       | turquoise |
| ILMN_2134555 | KCTD3     | turquoise |
| ILMN_1731353 | CHPF      | turquoise |
| ILMN_1740407 | CHSY3     | turquoise |
| ILMN_2151541 | DNAJC10   | turquoise |
| ILMN_2192245 | PLN       | turquoise |
| ILMN_1740441 | CYB5R3    | turquoise |
| ILMN_1701731 | AKR1B1    | turquoise |
| ILMN_2192683 | DHX37     | turquoise |
| ILMN_1738438 | MAST4     | turquoise |
| ILMN_1750658 | HAX1      | turquoise |
| ILMN_1727479 | TPRG1L    | turquoise |
| ILMN_2333319 | PTBP1     | turquoise |

|              |           |           |
|--------------|-----------|-----------|
| ILMN_1753575 | GP1BA     | turquoise |
| ILMN_1709132 | ELP2      | turquoise |
| ILMN_1757646 | UFM1      | turquoise |
| ILMN_2154950 | ZNF423    | turquoise |
| ILMN_1722718 | BMP2      | turquoise |
| ILMN_1787186 | NOV       | turquoise |
| ILMN_2330371 | TATDN3    | turquoise |
| ILMN_1665219 | LTBP4     | turquoise |
| ILMN_1679262 | DPYSL3    | turquoise |
| ILMN_2151579 | HMG1      | turquoise |
| ILMN_1677239 | CCDC14    | turquoise |
| ILMN_1652826 | LRRC17    | turquoise |
| ILMN_1803094 | PDGFD     | turquoise |
| ILMN_1698715 | NHLRC2    | turquoise |
| ILMN_1745573 | TTC13     | turquoise |
| ILMN_1727134 | KLHDC5    | turquoise |
| ILMN_1729117 | COL5A2    | turquoise |
| ILMN_1807074 | MIF       | turquoise |
| ILMN_2387395 | SCN3A     | turquoise |
| ILMN_1711823 | C17orf70  | turquoise |
| ILMN_1730710 | ADORA3    | turquoise |
| ILMN_2070300 | LSM2      | turquoise |
| ILMN_2115218 | ANKRD10   | turquoise |
| ILMN_2170353 | PTPLB     | turquoise |
| ILMN_1808707 | FSCN1     | turquoise |
| ILMN_1687864 | POP5      | turquoise |
| ILMN_1653514 | RBBP4     | turquoise |
| ILMN_1781148 | ASB10     | turquoise |
| ILMN_1782635 | YARS2     | turquoise |
| ILMN_1742866 | F2R       | turquoise |
| ILMN_1778595 | SLN       | turquoise |
| ILMN_1798006 | ANKRD35   | turquoise |
| ILMN_1720430 | PPDPF     | turquoise |
| ILMN_1693645 | DPY19L2P4 | turquoise |
| ILMN_1790778 | PNMA2     | turquoise |
| ILMN_1749846 | OMD       | turquoise |
| ILMN_2140990 | CAMK1     | turquoise |
| ILMN_1676763 | PIPSL     | turquoise |
| ILMN_2174612 | CNOT8     | turquoise |
| ILMN_1716797 | CD302     | turquoise |
| ILMN_1654392 | KHNYN     | turquoise |
| ILMN_1764813 | B3GALTL   | turquoise |
| ILMN_1782439 | CNN3      | turquoise |
| ILMN_2310703 | RPS26P47  | turquoise |
| ILMN_1699737 | TRAP1     | turquoise |

|              |           |           |
|--------------|-----------|-----------|
| ILMN_1739798 | MALSU1    | turquoise |
| ILMN_2223941 | FBLN5     | turquoise |
| ILMN_1735548 | HIVEP1    | turquoise |
| ILMN_1741331 | AP5M1     | turquoise |
| ILMN_1714384 | PCCA      | turquoise |
| ILMN_1775743 | BTG1      | turquoise |
| ILMN_2048607 | ANKRD9    | turquoise |
| ILMN_1862909 | RORA      | turquoise |
| ILMN_2307883 | ATP5J2    | turquoise |
| ILMN_2338323 | CDC25B    | turquoise |
| ILMN_1670272 | LRP10     | turquoise |
| ILMN_1718071 | AGTPBP1   | turquoise |
| ILMN_1801118 | SNRNP25   | turquoise |
| ILMN_1705464 | MRPL41    | turquoise |
| ILMN_1658053 | DYNLRB1   | turquoise |
| ILMN_1718852 | PLCL1     | turquoise |
| ILMN_1760280 | NXT1      | turquoise |
| ILMN_1776363 | ANK2      | turquoise |
| ILMN_1680860 | LEMD2     | turquoise |
| ILMN_1752299 | RAB6B     | turquoise |
| ILMN_2299612 | TMEM150A  | turquoise |
| ILMN_1718924 | ETFA      | turquoise |
| ILMN_1810604 | ELMOD1    | turquoise |
| ILMN_1707634 | CMC1      | turquoise |
| ILMN_1746375 | CSNK2A1P  | turquoise |
| ILMN_1847965 | RNF168    | turquoise |
| ILMN_1720235 | ADSSL1    | turquoise |
| ILMN_1656111 | MYLIP     | turquoise |
| ILMN_2062687 | FARP2     | turquoise |
| ILMN_1764158 | NLGN2     | turquoise |
| ILMN_1813207 | MRPS9     | turquoise |
| ILMN_1695290 | FERMT2    | turquoise |
| ILMN_1757552 | PTRF      | turquoise |
| ILMN_1763663 | HEATR3    | turquoise |
| ILMN_1753322 | FGF1      | turquoise |
| ILMN_1790555 | CCDC146   | turquoise |
| ILMN_1740586 | PLA2G2A   | turquoise |
| ILMN_1741175 | RAB11FIP2 | turquoise |
| ILMN_1725090 | CTHRC1    | turquoise |
| ILMN_2179018 | NDUFAB1   | turquoise |
| ILMN_1746359 | RERG      | turquoise |
| ILMN_1691181 | TMX1      | turquoise |
| ILMN_1719205 | FBL       | turquoise |
| ILMN_1751753 | IDH2      | turquoise |
| ILMN_1704369 | LIMA1     | turquoise |

|              |          |           |
|--------------|----------|-----------|
| ILMN_1703617 | AHSA1    | turquoise |
| ILMN_2051867 | PTCD2    | turquoise |
| ILMN_1651788 | MAP3K11  | turquoise |
| ILMN_1791912 | SIDT2    | turquoise |
| ILMN_1759419 | ILVBL    | turquoise |
| ILMN_1806123 | MRPL23   | turquoise |
| ILMN_2065690 | GRAMD3   | turquoise |
| ILMN_1790603 | ATPAF1   | turquoise |
| ILMN_2059689 | TMEM54   | turquoise |
| ILMN_1665300 | TRMT1L   | turquoise |
| ILMN_1756826 | MORN2    | turquoise |
| ILMN_1744980 | ZCCHC7   | turquoise |
| ILMN_1787526 | C2orf88  | turquoise |
| ILMN_2157421 | STUB1    | turquoise |
| ILMN_1685661 | RRP15    | turquoise |
| ILMN_2182531 | TIMM21   | turquoise |
| ILMN_1704477 | COX5A    | turquoise |
| ILMN_1798270 | C11orf75 | turquoise |
| ILMN_1803977 | GALNT1   | turquoise |
| ILMN_1701558 | MAP1A    | turquoise |
| ILMN_1687848 | C7       | turquoise |
| ILMN_1655177 | PI4KA    | turquoise |
| ILMN_1706505 | COL5A1   | turquoise |
| ILMN_1784540 | KBTBD2   | turquoise |
| ILMN_1656477 | ARSA     | turquoise |
| ILMN_1813753 | PTN      | turquoise |
| ILMN_1782504 | MTERFD1  | turquoise |
| ILMN_1760360 | LTN1     | turquoise |
| ILMN_2230892 | IL10RB   | turquoise |
| ILMN_1796734 | SPARC    | turquoise |
| ILMN_1775814 | GHR      | turquoise |
| ILMN_1687247 | SPATA20  | turquoise |
| ILMN_1652989 | NUP160   | turquoise |
| ILMN_1719696 | PLD1     | turquoise |
| ILMN_1661994 | ESRRG    | turquoise |
| ILMN_1655595 | SERPINE2 | turquoise |
| ILMN_2408179 | PRRC2A   | turquoise |
| ILMN_1815043 | MRPS2    | turquoise |
| ILMN_1671932 | SAMM50   | turquoise |
| ILMN_1728163 | CTDSP1   | turquoise |
| ILMN_1724367 | NDUFB1   | turquoise |
| ILMN_2380237 | C1QTNF1  | turquoise |
| ILMN_1789599 | NBL1     | turquoise |
| ILMN_1733869 | OGDH     | turquoise |
| ILMN_1702837 | PSMD1    | turquoise |

|              |           |           |
|--------------|-----------|-----------|
| ILMN_1813256 | CRIP1     | turquoise |
| ILMN_1738401 | FOXC1     | turquoise |
| ILMN_1684576 | CLN8      | turquoise |
| ILMN_1666819 | PHLDB1    | turquoise |
| ILMN_1689585 | C20orf194 | turquoise |
| ILMN_1749882 | STRN      | turquoise |
| ILMN_1752269 | ACSS1     | turquoise |
| ILMN_1675695 | PDS5B     | turquoise |
| ILMN_1775182 | GSR       | turquoise |
| ILMN_1664922 | FLNB      | turquoise |
| ILMN_2093674 | GMFB      | turquoise |
| ILMN_1773200 | CCP110    | turquoise |
| ILMN_1654497 | ATAD1     | turquoise |
| ILMN_1690839 | PPAPDC3   | turquoise |
| ILMN_1709772 | SNX5      | turquoise |
| ILMN_1685580 | CBLB      | turquoise |
| ILMN_1703718 | CCT7      | turquoise |
| ILMN_1811238 | ALPK2     | turquoise |
| ILMN_2264011 | GRAP      | turquoise |
| ILMN_1704619 | VPS29     | turquoise |
| ILMN_1806733 | COL18A1   | turquoise |
| ILMN_1726930 | C5orf44   | turquoise |
| ILMN_1686562 | KIF13B    | turquoise |
| ILMN_1735347 | MCEE      | turquoise |
| ILMN_1756469 | GAMT      | turquoise |
| ILMN_1720513 | SETBP1    | turquoise |
| ILMN_1757343 | PABPC4    | turquoise |
| ILMN_1708728 | H2AFJ     | turquoise |
| ILMN_1665319 | NRTN      | turquoise |
| ILMN_1703305 | TWF2      | turquoise |
| ILMN_1805992 | KIAA1598  | turquoise |
| ILMN_1731215 | MYBPHL    | turquoise |
| ILMN_1777584 | KARS      | turquoise |
| ILMN_1807611 | PPIG      | turquoise |
| ILMN_1670708 | F10       | turquoise |
| ILMN_1801130 | STOML1    | turquoise |
| ILMN_1775579 | ACAD9     | turquoise |
| ILMN_1808783 | STRBP     | turquoise |
| ILMN_1660345 | NGRN      | turquoise |
| ILMN_1728570 | TCF21     | turquoise |
| ILMN_1813295 | LMO3      | turquoise |
| ILMN_1686906 | TP53INP2  | turquoise |
| ILMN_1653115 | ECH1      | turquoise |
| ILMN_2112599 | C16orf80  | turquoise |
| ILMN_1685636 | KCNN2     | turquoise |

|              |          |           |
|--------------|----------|-----------|
| ILMN_1684554 | COL16A1  | turquoise |
| ILMN_1709683 | RASSF2   | turquoise |
| ILMN_1712673 | SASH1    | turquoise |
| ILMN_1726025 | ASXL1    | turquoise |
| ILMN_1779182 | TMEM98   | turquoise |
| ILMN_2400947 | CELF2    | turquoise |
| ILMN_2228938 | ECM2     | turquoise |
| ILMN_1693985 | JPH1     | turquoise |
| ILMN_2043918 | DLEU1    | turquoise |
| ILMN_1727098 | PPP1R16B | turquoise |
| ILMN_1799280 | BDH1     | turquoise |
| ILMN_1753472 | SUMF1    | turquoise |
| ILMN_1735552 | KIF1B    | turquoise |
| ILMN_1770290 | CNN2     | turquoise |
| ILMN_1704084 | CMAHP    | turquoise |
| ILMN_1719316 | TMED3    | turquoise |
| ILMN_1733937 | MMD      | turquoise |
| ILMN_1727813 | BRP44    | turquoise |
| ILMN_1691575 | SNX2     | turquoise |
| ILMN_1679188 | ATP5S    | turquoise |
| ILMN_1689652 | RNMTL1   | turquoise |
| ILMN_1717052 | STARD10  | turquoise |
| ILMN_1742332 | KCTD12   | turquoise |
| ILMN_1717477 | PSD3     | turquoise |
| ILMN_2395974 | PRDX3    | turquoise |
| ILMN_1671905 | SFR1     | turquoise |
| ILMN_1661137 | SH3RF2   | turquoise |
| ILMN_2153466 | FAM50B   | turquoise |
| ILMN_1814573 | FTSJD1   | turquoise |
| ILMN_1653266 | DNAJB14  | turquoise |
| ILMN_1659649 | SGCG     | turquoise |
| ILMN_1718132 | ECHS1    | turquoise |
| ILMN_1710078 | TMEM181  | turquoise |
| ILMN_1669972 | NCR3LG1  | turquoise |
| ILMN_1717674 | PEPD     | turquoise |
| ILMN_1751084 | FSD2     | turquoise |
| ILMN_1709815 | PURG     | turquoise |
| ILMN_1655990 | CDK5RAP2 | turquoise |
| ILMN_1656145 | GOT1     | turquoise |
| ILMN_1753241 | SNTA1    | turquoise |
| ILMN_1712751 | HADHA    | turquoise |
| ILMN_2340721 | TMEM134  | turquoise |
| ILMN_1701603 | ALPL     | turquoise |
| ILMN_1685124 | TCTN1    | turquoise |
| ILMN_1811636 | IFT57    | turquoise |

|              |           |           |
|--------------|-----------|-----------|
| ILMN_2146657 | FAHD2B    | turquoise |
| ILMN_1779381 | SEC61A2   | turquoise |
| ILMN_1688000 | POLDIP3   | turquoise |
| ILMN_2176768 | SEPHS1    | turquoise |
| ILMN_1665235 | CRTAP     | turquoise |
| ILMN_1668417 | WIPF1     | turquoise |
| ILMN_1694325 | NFIX      | turquoise |
| ILMN_1801101 | ZBTB48    | turquoise |
| ILMN_1913678 | IRAK3     | turquoise |
| ILMN_1701551 | ABCA6     | turquoise |
| ILMN_1746494 | FNTA      | turquoise |
| ILMN_1733288 | C1RL      | turquoise |
| ILMN_1694840 | MATN2     | turquoise |
| ILMN_1700419 | TMEM208   | turquoise |
| ILMN_1667361 | COPZ2     | turquoise |
| ILMN_1795495 | ERCC5     | turquoise |
| ILMN_1691566 | CCDC140   | turquoise |
| ILMN_1665601 | THAP4     | turquoise |
| ILMN_1739236 | ZNF668    | turquoise |
| ILMN_1786021 | PRKAB2    | turquoise |
| ILMN_2117904 | ZNF22     | turquoise |
| ILMN_2405915 | MRPS11    | turquoise |
| ILMN_1778803 | ZFAND6    | turquoise |
| ILMN_1653797 | C6orf62   | turquoise |
| ILMN_1750008 | SUPV3L1   | turquoise |
| ILMN_1749410 | PKP4      | turquoise |
| ILMN_2186216 | GOLIM4    | turquoise |
| ILMN_1743933 | TSHZ3     | turquoise |
| ILMN_1755727 | KDM5B     | turquoise |
| ILMN_1738784 | PPP2R5A   | turquoise |
| ILMN_1669433 | KIAA0913  | turquoise |
| ILMN_1741688 | CPXM2     | turquoise |
| ILMN_1719985 | FEM1A     | turquoise |
| ILMN_1813139 | ANKDD1A   | turquoise |
| ILMN_1727592 | FRMD5     | turquoise |
| ILMN_1732612 | SHB       | turquoise |
| ILMN_1719938 | FGF11     | turquoise |
| ILMN_1684628 | ZFP90     | turquoise |
| ILMN_1675709 | ARFGAP1   | turquoise |
| ILMN_1717934 | SYT11     | turquoise |
| ILMN_1673899 | FAM57A    | turquoise |
| ILMN_1825640 | LINC00441 | turquoise |
| ILMN_1811264 | C15orf57  | turquoise |
| ILMN_1911042 | PIP4K2A   | turquoise |
| ILMN_1815057 | PDGFRB    | turquoise |

|              |           |           |
|--------------|-----------|-----------|
| ILMN_2092664 | ADSS      | turquoise |
| ILMN_1783681 | MRPL34    | turquoise |
| ILMN_2322552 | NCKAP1    | turquoise |
| ILMN_1749006 | RCSD1     | turquoise |
| ILMN_1752117 | TMEM55A   | turquoise |
| ILMN_1797425 | DDX55     | turquoise |
| ILMN_1767766 | PRDX2     | turquoise |
| ILMN_1808238 | RBPMS2    | turquoise |
| ILMN_2176251 | C20orf72  | turquoise |
| ILMN_1737205 | MCM4      | turquoise |
| ILMN_1785618 | SMTN      | turquoise |
| ILMN_1659523 | USP39     | turquoise |
| ILMN_1749540 | RBM20     | turquoise |
| ILMN_1717636 | RGMA      | turquoise |
| ILMN_2379560 | CDC14B    | turquoise |
| ILMN_1738095 | PER2      | turquoise |
| ILMN_1783985 | COQ6      | turquoise |
| ILMN_1696276 | ZNF653    | turquoise |
| ILMN_1676413 | VSNL1     | turquoise |
| ILMN_1766222 | LARP4B    | turquoise |
| ILMN_1751228 | TMEM74B   | turquoise |
| ILMN_2345872 | SUMF2     | turquoise |
| ILMN_1734440 | C14orf133 | turquoise |
| ILMN_1665205 | ZNF260    | turquoise |
| ILMN_1796179 | HIST1H2BK | turquoise |
| ILMN_1791332 | ATP5O     | turquoise |
| ILMN_2385672 | ELN       | turquoise |
| ILMN_1795257 | GPT       | turquoise |
| ILMN_1785095 | ATP6V0E2  | turquoise |
| ILMN_2354855 | OTUB1     | turquoise |
| ILMN_1704195 | FUK       | turquoise |
| ILMN_1791280 | HSPB8     | turquoise |
| ILMN_2192281 | CARD8     | turquoise |
| ILMN_2112638 | SVEP1     | turquoise |
| ILMN_1754421 | NDUFAF1   | turquoise |
| ILMN_1729748 | PEF1      | turquoise |
| ILMN_1662322 | ANXA7     | turquoise |
| ILMN_1732187 | TMEM143   | turquoise |
| ILMN_1793598 | APIP      | turquoise |
| ILMN_2053538 | RHBDL2    | turquoise |
| ILMN_1675186 | ME2       | turquoise |
| ILMN_1795243 | RPS4XP16  | turquoise |
| ILMN_1796962 | PPP3R1    | turquoise |
| ILMN_1734290 | MAPRE3    | turquoise |
| ILMN_2300186 | DYNLL1    | turquoise |

|              |            |           |
|--------------|------------|-----------|
| ILMN_1862018 | ATXN7L3    | turquoise |
| ILMN_1729374 | ETFB       | turquoise |
| ILMN_2277419 | SLC38A10   | turquoise |
| ILMN_1725862 | USP3       | turquoise |
| ILMN_1682910 | SLC35B3    | turquoise |
| ILMN_2228180 | MSRA       | turquoise |
| ILMN_1721022 | SHC1       | turquoise |
| ILMN_1733511 | GOLGA3     | turquoise |
| ILMN_1810055 | ITFG3      | turquoise |
| ILMN_1769412 | RAPGEF1    | turquoise |
| ILMN_1691747 | KHDRBS3    | turquoise |
| ILMN_1723235 | DUS3L      | turquoise |
| ILMN_1762678 | NMT1       | turquoise |
| ILMN_1668629 | C4orf48    | turquoise |
| ILMN_1713807 | MAN1C1     | turquoise |
| ILMN_1810962 | PTPRK      | turquoise |
| ILMN_1812297 | CYP26B1    | turquoise |
| ILMN_1737314 | BCL6       | turquoise |
| ILMN_1716237 | ACOT2      | turquoise |
| ILMN_1680110 | C10orf116  | turquoise |
| ILMN_1726181 | C19orf52   | turquoise |
| ILMN_1813604 | NDUFB7     | turquoise |
| ILMN_1772521 | MTHFD1L    | turquoise |
| ILMN_1775268 | HECW2      | turquoise |
| ILMN_1719906 | HADH       | turquoise |
| ILMN_1809439 | HMGB1P1    | turquoise |
| ILMN_2324672 | USF2       | turquoise |
| ILMN_1806651 | PARP8      | turquoise |
| ILMN_2208495 | CERS5      | turquoise |
| ILMN_1789351 | SUV39H2    | turquoise |
| ILMN_1730794 | SERTAD4    | turquoise |
| ILMN_1669094 | ZNF672     | turquoise |
| ILMN_1764619 | DICER1-AS1 | turquoise |
| ILMN_1706583 | DLAT       | turquoise |
| ILMN_1718334 | ITPA       | turquoise |
| ILMN_1669070 | MIPEP      | turquoise |
| ILMN_1686194 | CWC27      | turquoise |
| ILMN_1664920 | C19orf12   | turquoise |
| ILMN_1662417 | LRPPRC     | turquoise |
| ILMN_1662731 | COL4A3     | turquoise |
| ILMN_1664362 | SGIP1      | turquoise |
| ILMN_2139943 | RPS3A      | turquoise |
| ILMN_1751708 | ITM2B      | turquoise |
| ILMN_1767894 | POLB       | turquoise |
| ILMN_1716564 | INTU       | turquoise |

|              |            |           |
|--------------|------------|-----------|
| ILMN_1746013 | SPOCK1     | turquoise |
| ILMN_1695157 | CA4        | turquoise |
| ILMN_1773901 | STX12      | turquoise |
| ILMN_1781149 | INMT       | turquoise |
| ILMN_1671885 | MLF2       | turquoise |
| ILMN_1735658 | RTTN       | turquoise |
| ILMN_1720083 | EHD4       | turquoise |
| ILMN_2091310 | ANO1       | turquoise |
| ILMN_1670925 | CYB5D1     | turquoise |
| ILMN_1797031 | HSPBAP1    | turquoise |
| ILMN_1693538 | STK36      | turquoise |
| ILMN_1730612 | DBNDD2     | turquoise |
| ILMN_1705064 | NDEL1      | turquoise |
| ILMN_1763264 | MRPL2      | turquoise |
| ILMN_2081645 | RSPO2      | turquoise |
| ILMN_1737398 | PTPLAD1    | turquoise |
| ILMN_1722156 | RWDD2A     | turquoise |
| ILMN_1807633 | HRSP12     | turquoise |
| ILMN_2396982 | BCL2L12    | turquoise |
| ILMN_1700306 | OCIAD2     | turquoise |
| ILMN_1705124 | DHRS7C     | turquoise |
| ILMN_1736730 | LRRC16A    | turquoise |
| ILMN_1680132 | CADM1      | turquoise |
| ILMN_1718424 | MRPS28     | turquoise |
| ILMN_2055477 | EXOSC7     | turquoise |
| ILMN_1718207 | SETDB1     | turquoise |
| ILMN_2139396 | IGDCC4     | turquoise |
| ILMN_1770800 | PODN       | turquoise |
| ILMN_1699772 | RRAGD      | turquoise |
| ILMN_1769288 | MAGI2-AS3  | turquoise |
| ILMN_1770245 | EPB41L5    | turquoise |
| ILMN_1715947 | HNRNPA1P12 | turquoise |
| ILMN_1655117 | WDR19      | turquoise |
| ILMN_1753823 | IL17D      | turquoise |
| ILMN_1670130 | ARID3A     | turquoise |
| ILMN_1728698 | GDE1       | turquoise |
| ILMN_2184184 | ANXA1      | turquoise |
| ILMN_2120247 | SLC2A10    | turquoise |
| ILMN_1709043 | PLGRKT     | turquoise |
| ILMN_1706005 | GALT       | turquoise |
| ILMN_1693317 | TRAPPC12   | turquoise |
| ILMN_1761159 | ESYT1      | turquoise |
| ILMN_1688295 | ZNF219     | turquoise |
| ILMN_1776993 | COG2       | turquoise |
| ILMN_2344221 | IGSF5      | turquoise |

|              |          |           |
|--------------|----------|-----------|
| ILMN_1774602 | FBLN2    | turquoise |
| ILMN_1808110 | TCEB3    | turquoise |
| ILMN_1718271 | MTIF3    | turquoise |
| ILMN_1705116 | SLC22A23 | turquoise |
| ILMN_1790807 | XPC      | turquoise |
| ILMN_2077952 | GALNTL1  | turquoise |
| ILMN_1695110 | BCAT2    | turquoise |
| ILMN_1814917 | TLE2     | turquoise |
| ILMN_1720710 | HSPB3    | turquoise |
| ILMN_1692199 | RNF103   | turquoise |
| ILMN_1735367 | HSD17B11 | turquoise |
| ILMN_1736178 | AEBP1    | turquoise |
| ILMN_1656822 | DNM2     | turquoise |
| ILMN_1763412 | SPHKAP   | turquoise |
| ILMN_1813763 | SLC20A2  | turquoise |
| ILMN_1746085 | IGFBP3   | turquoise |
| ILMN_1652246 | NACAD    | turquoise |
| ILMN_1759023 | WFS1     | turquoise |
| ILMN_1660691 | RAB31    | turquoise |
| ILMN_1705876 | NAP1L1   | turquoise |
| ILMN_1772964 | CCL8     | turquoise |
| ILMN_1804656 | COX14    | turquoise |
| ILMN_1690523 | LRRC20   | turquoise |
| ILMN_1735432 | ISCU     | turquoise |
| ILMN_1685112 | TACO1    | turquoise |
| ILMN_1690320 | TTC23    | turquoise |
| ILMN_1676062 | DIP2C    | turquoise |
| ILMN_1667068 | ZC3HAV1  | turquoise |
| ILMN_1733377 | FASTKD5  | turquoise |
| ILMN_1651699 | EPS8     | turquoise |
| ILMN_1723418 | CEL      | turquoise |
| ILMN_1765523 | TOLLIP   | turquoise |
| ILMN_1737611 | VAMP1    | turquoise |
| ILMN_1669881 | TSPAN13  | turquoise |
| ILMN_1681437 | DCXR     | turquoise |
| ILMN_1764557 | FITM1    | turquoise |
| ILMN_1795383 | RPUSD3   | turquoise |
| ILMN_1786050 | RBBP9    | turquoise |
| ILMN_1734472 | PEBP4    | turquoise |
| ILMN_1769926 | DBN1     | turquoise |
| ILMN_1662964 | PRMT3    | turquoise |
| ILMN_1680948 | LMOD1    | turquoise |
| ILMN_1807596 | UBAP1    | turquoise |
| ILMN_1737089 | CAPN5    | turquoise |
| ILMN_1655663 | LEPREL4  | turquoise |

|              |          |           |
|--------------|----------|-----------|
| ILMN_1711439 | EMILIN1  | turquoise |
| ILMN_1709227 | CCDC84   | turquoise |
| ILMN_1794914 | UBTD1    | turquoise |
| ILMN_1652512 | C2CD2    | turquoise |
| ILMN_1714433 | MARCKSL1 | turquoise |
| ILMN_2400219 | SRI      | turquoise |
| ILMN_1681503 | MCM2     | turquoise |
| ILMN_1706200 | MED15    | turquoise |
| ILMN_1786684 | MTRF1L   | turquoise |
| ILMN_1738816 | FOXO1    | turquoise |
| ILMN_1737084 | TXLNA    | turquoise |
| ILMN_1806907 | PAWR     | turquoise |
| ILMN_1706664 | RIMKLA   | turquoise |
| ILMN_1810996 | COL24A1  | turquoise |
| ILMN_1698725 | FRMD3    | turquoise |
| ILMN_1755649 | SLC16A5  | turquoise |
| ILMN_1675656 | PPFIBP2  | turquoise |
| ILMN_1746393 | TSEN2    | turquoise |
| ILMN_1739497 | GTF2H5   | turquoise |
| ILMN_2186108 | DGCR6    | turquoise |
| ILMN_1709032 | FYCO1    | turquoise |
| ILMN_1797530 | CHCHD5   | turquoise |
| ILMN_1702065 | MFSD5    | turquoise |
| ILMN_1761277 | PDE4C    | turquoise |
| ILMN_2406586 | CC2D2A   | turquoise |
| ILMN_1735474 | R3HCC1   | turquoise |
| ILMN_1748881 | MRAS     | turquoise |
| ILMN_1760490 | ACVR1    | turquoise |
| ILMN_1845037 | TRIM69   | turquoise |
| ILMN_1685289 | C16orf58 | turquoise |
| ILMN_1781184 | MYBPC3   | turquoise |
| ILMN_1680673 | NT5DC1   | turquoise |
| ILMN_1701308 | COL1A1   | turquoise |
| ILMN_1736752 | COMTD1   | turquoise |
| ILMN_1726352 | THSD4    | turquoise |
| ILMN_1673363 | CD97     | turquoise |
| ILMN_1801348 | GOT2     | turquoise |
| ILMN_1790533 | PHACTR2  | turquoise |
| ILMN_1661537 | LEPROT   | turquoise |
| ILMN_1756701 | DHRS11   | turquoise |
| ILMN_1673639 | ABI3BP   | turquoise |
| ILMN_1803476 | KCTD20   | turquoise |
| ILMN_1788689 | PHIP     | turquoise |
| ILMN_1704876 | USP38    | turquoise |
| ILMN_1814213 | PQLC3    | turquoise |

|              |          |           |
|--------------|----------|-----------|
| ILMN_2386008 | MPZL1    | turquoise |
| ILMN_2395156 | PRELP    | turquoise |
| ILMN_1743910 | PANK4    | turquoise |
| ILMN_2367469 | CARS     | turquoise |
| ILMN_2374633 | ZWILCH   | turquoise |
| ILMN_1675936 | HIGD1B   | turquoise |
| ILMN_2283388 | C20orf24 | turquoise |
| ILMN_2068747 | OAT      | turquoise |
| ILMN_1802082 | PRDM8    | turquoise |
| ILMN_1704094 | PSMA6    | turquoise |
| ILMN_1693218 | ART3     | turquoise |
| ILMN_1674941 | ANO6     | turquoise |
| ILMN_2044085 | RQCD1    | turquoise |
| ILMN_1706764 | GOLPH3L  | turquoise |
| ILMN_2150258 | ZFP36L2  | turquoise |
| ILMN_1714335 | RDH10    | turquoise |
| ILMN_2043809 | PFKM     | turquoise |
| ILMN_1664175 | VAMP4    | turquoise |
| ILMN_1706935 | CCDC136  | turquoise |
| ILMN_1736021 | PRPF4B   | turquoise |
| ILMN_1798826 | MRPS25   | turquoise |
| ILMN_1756942 | SP3      | turquoise |
| ILMN_1655311 | C15orf61 | turquoise |
| ILMN_1695946 | TRNP1    | turquoise |
| ILMN_1800058 | NKX2-5   | turquoise |
| ILMN_1813028 | CBX5     | turquoise |
| ILMN_1756784 | NCS1     | turquoise |
| ILMN_1795442 | LAMA4    | turquoise |
| ILMN_1792072 | FUT4     | turquoise |
| ILMN_2399503 | UBN1     | turquoise |
| ILMN_1669273 | PPT1     | turquoise |
| ILMN_1801124 | MSANTD4  | turquoise |
| ILMN_1805448 | EPB41L2  | turquoise |
| ILMN_1653494 | S100A1   | turquoise |
| ILMN_1668996 | C1QBP    | turquoise |
| ILMN_2274923 | MOCS2    | turquoise |
| ILMN_1726743 | MRPS30   | turquoise |
| ILMN_2234229 | PRMT6    | turquoise |
| ILMN_1757336 | LRCH3    | turquoise |
| ILMN_1743303 | TTC1     | turquoise |
| ILMN_1706498 | DSE      | turquoise |
| ILMN_1678353 | FARP1    | turquoise |
| ILMN_1785988 | CSNK1A1  | turquoise |
| ILMN_1676336 | NCEH1    | turquoise |
| ILMN_2380588 | C6orf108 | turquoise |

|              |          |           |
|--------------|----------|-----------|
| ILMN_2171640 | UBR3     | turquoise |
| ILMN_1713124 | AKR1C3   | turquoise |
| ILMN_1651767 | MKL1     | turquoise |
| ILMN_1670926 | CHST15   | turquoise |
| ILMN_1789244 | SOX8     | turquoise |
| ILMN_1692706 | DCUN1D2  | turquoise |
| ILMN_1676986 | NPIPP1   | turquoise |
| ILMN_2389876 | TGFB1I1  | turquoise |
| ILMN_2231911 | AUH      | turquoise |
| ILMN_1815169 | MCM5     | turquoise |
| ILMN_1727051 | DDX19A   | turquoise |
| ILMN_1755974 | ALDOC    | turquoise |
| ILMN_1660577 | ATP5G2   | turquoise |
| ILMN_1738239 | RBM6     | turquoise |
| ILMN_1763941 | LRRC49   | turquoise |
| ILMN_2122420 | HMGCL    | turquoise |
| ILMN_1814589 | KIF22    | turquoise |
| ILMN_1790136 | C20orf20 | turquoise |
| ILMN_1673604 | YIPF3    | turquoise |
| ILMN_1703041 | IDUA     | turquoise |
| ILMN_1694479 | WDR18    | turquoise |
| ILMN_1770719 | KIAA0664 | turquoise |
| ILMN_1701749 | UQCRFS1  | turquoise |
| ILMN_1762990 | KIAA0141 | turquoise |
| ILMN_1722056 | ATP7B    | turquoise |
| ILMN_1677038 | CPED1    | turquoise |
| ILMN_2393254 | CAPNS1   | turquoise |
| ILMN_1736448 | VWC2     | turquoise |
| ILMN_2138589 | MERTK    | turquoise |
| ILMN_1752923 | IFNAR1   | turquoise |
| ILMN_1782938 | SLC16A10 | turquoise |
| ILMN_1669940 | TMEM38B  | turquoise |
| ILMN_2395375 | GABBR1   | turquoise |
| ILMN_1657632 | ZMYM6    | turquoise |
| ILMN_1755674 | EDDM3A   | turquoise |
| ILMN_2217809 | TMEM126A | turquoise |
| ILMN_1733991 | UBL7     | turquoise |
| ILMN_1698209 | AGPS     | turquoise |
| ILMN_1668451 | LMOD2    | turquoise |
| ILMN_1798288 | MOB3C    | turquoise |
| ILMN_2066151 | TEK      | turquoise |
| ILMN_1770936 | COQ5     | turquoise |
| ILMN_1732151 | COL6A1   | turquoise |
| ILMN_2347807 | EXOC1    | turquoise |
| ILMN_1795181 | DDX60    | turquoise |

|              |         |           |
|--------------|---------|-----------|
| ILMN_1814789 | UBAP2L  | turquoise |
| ILMN_1858599 | RBM43   | turquoise |
| ILMN_1698777 | ADCK1   | turquoise |
| ILMN_2372639 | TRAPPC5 | turquoise |
| ILMN_1763129 | DCTPP1  | turquoise |
| ILMN_2334989 | CCT3    | turquoise |

## Supplemental References

1. Zhang B, Horvath S. A general framework for weighted gene co-expression network analysis. *Stat Appl Genet Mol Biol*. 2005;4:Article17.
2. Albert R. Scale-free networks in cell biology. *J Cell Sci*. 2005;118(Pt 21):4947-4957.
3. Ravasz E, Somera AL, Mongru DA, Oltvai ZN, Barabasi AL. Hierarchical organization of modularity in metabolic networks. *Science*. 2002;297(5586):1551-1555.
